# Supplementary material for: Identification of genes for salt tolerance and yield-related traits in rice plants grown hydroponically and under saline field conditions by genome-wide association study
Source: Rice (N Y). 2019 Dec 2;12:88. doi: 10.1186/s12284-019-0349-z (PMC6889114; doi:10.1186/s12284-019-0349-z)
Supplement: Supplementary file 1 — Additional file 1: Table S1. Rice accessions included in the ST association panel. Table S2. All identified marker-trait associations and the corresponding annotated genes. Table S3. Known genes involved in rice salt stress recorded in the QTARO and funricegenes databases. Table S4. The promising candidate genes for ST showed the same functional annotations and GO terms as genes known to be involved in salt stress. Table S5. ANOVA for haplotypes of 43 genes with the target traits. Table S6. ANOVA for haplotypes of the 15 promising genes with GY in each subgroup grown in two environments. Table S7. Well performing accessions carrying favorable haplotypes of four genes associated with GY and two genes associated with SSI and SSD [file 12284_2019_349_MOESM1_ESM.xlsx]

## Sheet: Table S1
Table S1 The matrials of the association panel
DNA_UNIQUE_ID	Name	ORI_COUNTRY	Variety type	Group attribution
B009	Vietnam Zaodao	Vietnam	Indica	Xian
B013	Sri Lanka 1	Sri lanka	Indica	Xian
B027	C 894-21	Phillipines	Indica	Xian
B028	IR 10179-23-1-3	Phillipines	Indica	Xian
B032	Rohini	India	Indica	Xian
B033	BW 293-2	Sri lanka	Indica	Xian
B035	American Rice	United States	Indica	Xian
B039	IRAT 10	Ivory Coast	Intermediate type	Xian
B040	K 24	Uganda	Indica	Xian
B048	CISOKAN	Indonesia	Indica	Xian
B051	GZ 1368-5-4	Egypt	Indica	Xian
B052	J34	Madagascar	Indica	Xian
B058	Erjiunan 1	China	Indica	Xian
B059	Nanjing 11	China	Indica	Xian
B060	Aijiaonante	China	Indica	Xian
B063	Guizhao 2	China	Indica	Xian
B064	Xiangzaoxian 7	China	Indica	Xian
B067	Funingzipigengzi	China	Indica	Xian
B083	Dongtingwanxian	China	Indica	Xian
B085	Xugunuo	China	Indica	Xian
B087	Zhongnong 4	China	Indica	Xian
B088	San**Qishiluo	China	Indica	Xian
B092	Gongju 73	China	Indica	Xian
B112	Liusha 1	China	Indica	Xian
B113	Chenwan 3	China	Indica	Xian
B114	Chengduai 3	China	Indica	Xian
B115	Aimakang	China	Indica	Xian
B116	Shufeng 101	China	Indica	Xian
B120	Hongwan 1	China	Indica	Xian
B121	Luke 3	China	Indica	Xian
B125	Xiangwanxian 3	China	Indica	Xian
B127	Dangyu 5	China	Indica	Xian
B128	Sibeitizhao 6	China	Indica	Xian
B138	Gu 154	China	Indica	Xian
B145	Teqingxuanhui	China	Indica	Xian
B146	JWR 221	China	Indica	Xian
B150	L 301B	China	Indica	Xian
B151	Jinnante 43B	China	Indica	Xian
B153	Qingsiai 16B	China	Indica	Xian
B155	Baoxie -7B	China	Indica	Xian
B156	G珍汕97B	China	Indica	Xian
B157	88B	China	Indica	Xian
B159	Taizhongzailai 1/taizhong65	China	Indica	Xian
B176	BRC 25-146-2-1	Bangladesh	Indica	Xian
B180	P1790-5-1M-4-5M-1B-3M-B	Columbia	Indica	Xian
B181	71011	Australia	Indica	Xian
B185	SLK 2-18-2	Laos	Indica	Xian
B187	RP 1570-44-1	India	Indica	Xian
B193	C.MEDIO 7	Cuba	Indica	Xian
B194	ECIA 179-S13	Cuba	Indica	Xian
B195	PMS 10B	India	Indica	Xian
B197	Taizhongxianxuan 2	China	Indica	Xian
B200	Jinyou 1	China	Indica	Xian
B201	Chengnongshuijing	China	Indica	Xian
B202	Baoxie 123B	China	Indica	Xian
B229	Menjiading 2	China	Indica	Xian
B232	Xiangaizao 10hao	China	Indica	Xian
B233	Xiangwanxian 1	China	Indica	Xian
B234	Aituogu 151	China	Indica	Xian
B239	Zhendao 232	China	Indica	Xian
B242	Gui 630	China	Indica	Xian
B243	Huhui 91269	China	Aus	Xian
B248	Zhuzhen B	China	Indica	Xian
B253	Jiangnongzao 1 B	China	Indica	Xian
B254	Jinghu3 B	China	Indica	Xian
B255	Dianrui 409B	China	Indica	Xian
CX10	Gang 46B	China	Indica	Xian
CX100	Palung 2	Nepal	Indica	Xian
CX107	Tun Sart	Vietnam	Indica	Xian
CX114	Guang Lu Ai 4	China	Indica	Xian
CX115	Yun hui 72	China	Indica	Xian
CX117	IR65600-27-1-2-2	Phillipines	Indica	Xian
CX118	Yetuozai	China	Indica	Xian
CX119	P59279		Indica	Xian
CX12	Huagengxian 74	China	Indica	Xian
CX121	Guang122	China	Indica	Xian
CX122	Tai-Zhong-Xian 10	Taiwan	Indica	Xian
CX125	CAOZHAO-2	China	Indica	Xian
CX126	IRBB60	Phillipines	Indica	Xian
CX13	R644	China	Indica	Xian
CX133	Zhengshan97	China	Indica	Xian
CX134	IRBB7	Phillipines	Indica	Xian
CX145	Minghui 63	China	Indica	Xian
CX147	Seberang		Indica	Xian
CX15	Y134	China	Indica	Xian
CX150	Chorofa	Phillipines	Indica	Xian
CX152	Cisadane		Indica	Xian
CX162	TN1	Taiwan	Indica	Xian
CX182	SLG1	Japan	Indica	Xian
CX19	Zhong 413	China	Indica	Xian
CX2	BR11	Bangladesh	Indica	Xian
CX206	IR2061-522-6-9	Phillipines	Indica	Xian
CX21	Bg90-2	Sri Lanka	Indica	Xian
CX210	Qb_604	China	Indica	Xian
CX219	FL478	Phillipines	Indica	Xian
CX22	PR106	India	Indica	Xian
CX221	Zhongyouzao 81	China	Indica	Xian
CX225	IR77298-14-1-2	Phillipines	Indica	Xian
CX226	IR06G113	Phillipines	Indica	Xian
CX228	Bala	India	Indica	Xian
CX230	IR64-IL	China	Indica	Xian
CX232	IR55419-04	Phillipines	Indica	Xian
CX234	IR62266-42-6-2	Phillipines	Intermediate type	Xian
CX235	NSIC RC9 (APO)	Phillipines	Indica	Xian
CX238	BW311-9	Phillipines	Indica	Xian
CX24	TKM 9	India	Indica	Xian
CX247	IRAT144	Indonesia	Indica	Xian
CX249	2004	China	Indica	Xian
CX25	Cisanggarung	Indonesia	Indica	Xian
CX250	829	China	Intermediate type	Xian
CX263	PADISENEMOK		Intermediate type	Xian
CX265	MONOLAYA	United States	Intermediate type	Xian
CX267	IET1444	India	Indica	Xian
CX27	Khazar	Iran	Indica	Xian
CX276	IR8192-200-3-3-1-1	Phillipines	Indica	Xian
CX278	IR68	Phillipines	Indica	Xian
CX28	Gayabyeo	Korea	Intermediate type	Xian
CX288	D11	China	Indica	Xian
CX290	Duo 57	China	Indica	Xian
CX291	D15	China	Indica	Xian
CX296	IR74	Phillipines	Indica	Xian
CX30	MR185	Malaysia	Intermediate type	Xian
CX303	LX2007	China	Indica	Xian
CX305	ZH5	China	Intermediate type	Xian
CX31	Hnankar	Myanmar	Indica	Xian
CX313	R106	China	Indica	Xian
CX328	Baoxuan 21	China	Indica	Xian
CX33	Shwe Thwe Yin Hyv	Myanmar	Intermediate type	Xian
CX34	Bg 300	Sri Lanka	Intermediate type	Xian
CX340	Hua 564	China	Indica	Xian
CX341	Hua 565	China	Indica	Xian
CX342	Wanxian 763	China	Intermediate type	Xian
CX343	Wanxian 77	China	Indica	Xian
CX346	SAGC－4	China	Indica	Xian
CX347	SAGC－7	China	Intermediate type	Xian
CX348	Zhonghua 1	China	Indica	Xian
CX349	KCD1		Indica	Xian
CX35	Bg 94-1	Sri Lanka	Indica	Xian
CX357	PSBRC80	Phillipines	Indica	Xian
CX358	PSBRC82	Phillipines	Indica	Xian
CX360	Y075		Indica	Xian
CX361	G341		Indica	Xian
CX362	YZX1		Indica	Xian
CX363	YZX2		Indica	Xian
CX364	42686		Indica	Xian
CX365	Compact Plant Type Material	China	Intermediate type	Xian
CX366	Ganwanxian 37（926）	China	Indica	Xian
CX368	N22	India	Aus	Xian
CX369	IRBB62	Phillipines	Indica	Xian
CX37	OM997	Vietnam	Aus	Xian
CX370	Chenghui 727	China	Intermediate type	Xian
CX375	NERICA-L-1	Africa	Indica	Xian
CX377	NERICA-L-27	Africa	Indica	Xian
CX378	Huhan 15	China	Indica	Xian
CX379	Nionoka	Mali	Indica	Xian
CX381	Adny 11		Indica	Xian
CX382	Kogomg 1-1		Indica	Xian
CX385	NPT-100	China	Intermediate type	Xian
CX386	NPT-114	China	Indica	Xian
CX388	KR200	Thailand	Indica	Xian
CX392	SARD		Indica	Xian
CX393	Huangsizhan	China	Indica	Xian
CX394	Molizhanxuan	China	Indica	Xian
CX395	YSBR1	China	Indica	Xian
CX399	Matatag2	Phillipines	Indica	Xian
CX4	93072	China	Intermediate type	Xian
CX403	IR64a	Phillipines	Indica	Xian
CX42	IR68552-55-3-2	Phillipines	Indica	Xian
CX43	IR66897B	Phillipines	Indica	Xian
CX44	IR58025B	Phillipines	Indica	Xian
CX45	Dhan4	India	Intermediate type	Xian
CX46	Pusa(Basmati 1)	India	Intermediate type	Xian
CX48	PT60	China	Intermediate type	Xian
CX5	108S	China	Indica	Xian
CX50	Ai Zi DAO	China	Indica	Xian
CX52	Diandun 502	China	Indica	Xian
CX53	Jiangxisimiao	China	Indica	Xian
CX542	RR2-6	China	Indica	Xian
CX548	Zhongjian 100	China	Indica	Xian
CX64	IRAT 352	Phillipines	Indica	Xian
CX68	MR106	Malaysia	Indica	Xian
CX69	MR167	Malaysia	Indica	Xian
CX70	MR77(Seberang )	Malaysia	Indica	Xian
CX72	Basmati 385	Pakistan	Intermediate type	Xian
CX73	IR6	Phillipines	Indica	Xian
CX76	BG304	Sri Lanka	Indica	Xian
CX79	Cs94	Vietnam	Indica	Xian
CX8	Chenghui 448	China	Indica	Xian
CX80	OM1706	Vietnam	Indica	Xian
CX82	X21	Vietnam	Indica	Xian
CX83	X22	Vietnam	Indica	Xian
CX84	X23	Vietnam	Indica	Xian
CX85	C71	Vietnam	Indica	Xian
CX86	C70	Vietnam	Indica	Xian
CX87	Q5	Vietnam	Indica	Xian
CX89	M202	United States	Intermediate type	Xian
CX9	Fengaizhan	China	Indica	Xian
CX90	Chhomromg	Nepal	Indica	Xian
CX91	Govind	india	Indica	Xian
CX92	UPR 191-66	india	Indica	Xian
CX93	TGMS29	india	Indica	Xian
CX96	Ajaya	india	Indica	Xian
CX97	Budda	india	Indica	Xian
IRIS 313-10000	SUWEON 311	South Korea	Indica	Xian
IRIS 313-10001	C 662083	Taiwan	Indica	Xian
IRIS 313-10002	BW295-5	Sri Lanka	Indica	Xian
IRIS 313-10016	BOHOTO BALOOCHESTAN	Iran	Basmati/sadri	Xian
IRIS 313-10040	MILYANG 77	South Korea	Indica	Xian
IRIS 313-10046	CHAMA(DWARF)	Zambia	Indica	Xian
IRIS 313-10047	EX MARABA-GURUKU	Nigeria	Indica	Xian
IRIS 313-10077	TAMASHIRO HIKARI	Japan	Japonica	Xian
IRIS 313-10103	DALSUNG 41	South Korea	Indica	Xian
IRIS 313-10113	EX FOILAEIN(NAPUTO)	Mozambique	Indica	Xian
IRIS 313-10148	CAUVERY	India	Indica	Xian
IRIS 313-10161	BR-IRGA-409	Brazil	Indica	Xian
IRIS 313-10167	IR 56	Philippines	Indica	Xian
IRIS 313-10171	YA NONG ZAO 4	China	Indica	Xian
IRIS 313-10191	MIN KE ZHAN	China	Indica	Xian
IRIS 313-10220	EPEAL 102	Brazil	Indica	Xian
IRIS 313-10234	PSBRC50	Philippines	Indica	Xian
IRIS 313-10235	PSBRC68	Philippines	Indica	Xian
IRIS 313-10247	AMISTAD 82	Cuba	Indica	Xian
IRIS 313-10260	CEA 3	Paraguay	Indica	Xian
IRIS 313-10263	CUYAMEL 3820	Mexico	Indica	Xian
IRIS 313-10268	FONAIAP 2	Venezuela	Indica	Xian
IRIS 313-10271	IA CUBA 17	Cuba	Indica	Xian
IRIS 313-10274	ICTA CRISPO 38	Guatemala	Indica	Xian
IRIS 313-10275	ICTA MOTAGUA	Guatemala	Indica	Xian
IRIS 313-10279	JUMA 62	Dominican Republic	Indica	Xian
IRIS 313-10285	SICAN	Peru	Indica	Xian
IRIS 313-10287	UQUIHUA	Peru	Indica	Xian
IRIS 313-10289	ARAURE 1	Venezuela	Indica	Xian
IRIS 313-10290	ELONI	Suriname	Indica	Xian
IRIS 313-10293	ECIA 24-107-1	Cuba	Japonica	Xian
IRIS 313-10294	IR 21015-72-3-3-3-1	Philippines	Indica	Xian
IRIS 313-10298	3210	Sri Lanka	Indica	Xian
IRIS 313-10300	CT 9506-18-7-1T-2	Colombia	Indica	Xian
IRIS 313-10301	IRGA 959-1-2-2F-4-1-4A-6-CA-6X	Brazil	Indica	Xian
IRIS 313-10307	INIAP 6	Ecuador	Indica	Xian
IRIS 313-10314	INIAP 10	Ecuador	Tropical japonica	Xian
IRIS 313-10318	RUSTIC	Guyana	Indica	Xian
IRIS 313-10333	B 6136-3-TB-0-1-5	Indonesia	Indica	Xian
IRIS 313-10353	HP 3319-2WX-6-4-1-B	South Korea	Indica	Xian
IRIS 313-10359	IR 53650-2B-10-1-2-1	Philippines	Temperate japonica	Xian
IRIS 313-10361	IR 63295-AC 209-7	Philippines	Indica	Xian
IRIS 313-10366	IR 65483-111-5-9-2-11	Philippines	Indica	Xian
IRIS 313-10371	IR 67518-B-11-1-B	Philippines	Indica	Xian
IRIS 313-10374	IR 69502-6-SRN-3-UBN-1-B	Philippines	Indica	Xian
IRIS 313-10380	IR 73690-7-2-1-1-3-2-2-1	Philippines	Temperate japonica	Xian
IRIS 313-10385	IR 75870-5-8-5-B-1	Philippines	Indica	Xian
IRIS 313-10394	IR 80310-12-B-1-3-B	Philippines	Indica	Xian
IRIS 313-10396	IR 80340-23-B-12-6-B	Philippines	Indica	Xian
IRIS 313-10397	IRGA 318-11-6-9-2B	Colombia	Indica	Xian
IRIS 313-10398	IRGA 318-11-9-2A	Colombia	Indica	Xian
IRIS 313-10400	IRGA 370-38-1-1F-C4-2	Colombia	Indica	Xian
IRIS 313-10402	IRGA 411-1-6-1F-A	Colombia	Indica	Xian
IRIS 313-10404	K 479-2-3	India	Indica	Xian
IRIS 313-10412	RR 272-17-829	Indonesia	Indica	Xian
IRIS 313-10417	UPR 1201-1-20-1	India	Indica	Xian
IRIS 313-10544	DONGREM	India	Indica	Xian
IRIS 313-10561	NAN-TEO 14	China	Indica	Xian
IRIS 313-10628		India	Indica	Xian
IRIS 313-10662	KAHATAWEE	Sri Lanka	Indica	Xian
IRIS 313-10716	MURUNGA	Sri Lanka	Indica	Xian
IRIS 313-10721	HALSUDU HEENATI	Sri Lanka	Indica	Xian
IRIS 313-10753	ZACATEPEC	United States	Indica	Xian
IRIS 313-10754	KH998	India	Indica	Xian
IRIS 313-10833	EDAKKADAN 0-69-27	India	Indica	Xian
IRIS 313-10842	LUBUK LINGGAU	Indonesia	Indica	Xian
IRIS 313-10849	ARC 7001	India	Aus/boro	Xian
IRIS 313-10897	ARC 13373	India	Indica	Xian
IRIS 313-10927	SUGA PANKHA	Nepal	Aus/boro	Xian
IRIS 313-10928	KHAO' SIM	Thailand	Indica	Xian
IRIS 313-10932	CHINA 1039 MUTANT(DWARF)	China	Indica	Xian
IRIS 313-10996	BAKASI	Indonesia	Indica	Xian
IRIS 313-11011	SUNAR	Indonesia	Indica	Xian
IRIS 313-11038	AI-NAN-TSAO 39	China	Indica	Xian
IRIS 313-11039	KWANG-LU-AI 4	China	Indica	Xian
IRIS 313-11080	Phae meun lan	Laos	Indica	Xian
IRIS 313-11089	SRAU THMOR	Cambodia	Indica	Xian
IRIS 313-11108		Liberia	Indica	Xian
IRIS 313-11158	NAN-ERH-AI 5	China	Indica	Xian
IRIS 313-11162	SABRAN	Indonesia	Indica	Xian
IRIS 313-11181	TAMBA PERAK	Indonesia	Indica	Xian
IRIS 313-11197	K 17-9-1-1	India	Indica	Xian
IRIS 313-11233	SPR7284-57-5	Thailand	Indica	Xian
IRIS 313-11237	TAICHUNG SEN-YU 214	Taiwan	Indica	Xian
IRIS 313-11240	CR157-392-4	India	Indica	Xian
IRIS 313-11243	RATNAGIRI 45-2	India	Aus/boro	Xian
IRIS 313-11245	RP20-12	India	Indica	Xian
IRIS 313-11254	TIEN SOM	Vietnam	Indica	Xian
IRIS 313-11318	TUBU	Indonesia	Indica	Xian
IRIS 313-11355	CN44-40-7	India	Indica	Xian
IRIS 313-11357	CR579-1-3	India	Indica	Xian
IRIS 313-11422	13946(GUANG-QIU 15)	China	Indica	Xian
IRIS 313-11431	C 166-135	Philippines	Indica	Xian
IRIS 313-11433	MR136-1	India	Tropical japonica	Xian
IRIS 313-11437	CAMPECHE A79	Mexico	Temperate japonica	Xian
IRIS 313-11453	ZINYA KOLAMBA	India	Aus/boro	Xian
IRIS 313-11458	KARAHANI	India	Temperate japonica	Xian
IRIS 313-11476	KALIPINCH	India	Aus/boro	Xian
IRIS 313-11480	PR106	India	Aus/boro	Xian
IRIS 313-11493	AR 133	India	Tropical japonica	Xian
IRIS 313-11507	TV30	Vietnam	Indica	Xian
IRIS 313-11510	A 69-1	Sri Lanka	Tropical japonica	Xian
IRIS 313-11513	CHATO	Ecuador	Tropical japonica	Xian
IRIS 313-11516	IR 3839-1	Philippines	Indica	Xian
IRIS 313-11517	IR 4432-28-5	Philippines	Indica	Xian
IRIS 313-11538	J 6 IR520(WC693)	Philippines	Tropical japonica	Xian
IRIS 313-11570	GENG 77-4	China	Temperate japonica	Xian
IRIS 313-11596	BHAINSA MUNDARIYA	India	Indica	Xian
IRIS 313-11597	BHATA PYAGI	India	Aus/boro	Xian
IRIS 313-11600	KOTODESHI	India	Aus/boro	Xian
IRIS 313-11604	SUGARKAND	India	Indica	Xian
IRIS 313-11622	JUAN YE LAI	China	Tropical japonica	Xian
IRIS 313-11636	NCS271 A	India	Indica	Xian
IRIS 313-11639	NCS349	India	Indica	Xian
IRIS 313-11664	CUN GU NUO	China	Indica	Xian
IRIS 313-11666	LONG GE 33	China	Indica	Xian
IRIS 313-11667	LUO AI ZAO 3	China	Indica	Xian
IRIS 313-11668	RONG DAO 4	China	Indica	Xian
IRIS 313-11712	GORA DHAN 2	India	Indica	Xian
IRIS 313-11714	CHAMPION	Guyana	Indica	Xian
IRIS 313-11722	KABERI	Bangladesh	Indica	Xian
IRIS 313-11727	HONG YANG ZAO 3	China	Indica	Xian
IRIS 313-11729	MEI LIU ZAO 5	China	Indica	Xian
IRIS 313-11731	QING TAI AI	China	Indica	Xian
IRIS 313-11732	QING ZAO 3	China	Indica	Xian
IRIS 313-11733	SHUANG BAI AI 2	China	Indica	Xian
IRIS 313-11734	SI CHAO 1	China	Indica	Xian
IRIS 313-11738	PAUNDRI	India	Tropical japonica	Xian
IRIS 313-11742	KALIBAJARI	India	Basmati/sadri	Xian
IRIS 313-11746	E 2070	China	Indica	Xian
IRIS 313-11747	E 4197	China	Temperate japonica	Xian
IRIS 313-11751	L 10833	China	Indica	Xian
IRIS 313-11752	M 6034-1	China	Indica	Xian
IRIS 313-11763	PJ110	Cameroon	Indica	Xian
IRIS 313-11784	MBEIMBEIHUN	Sierra Leone	Indica	Xian
IRIS 313-11795	DA GU AI 7	China	Indica	Xian
IRIS 313-11797	E ZI 32	China	Indica	Xian
IRIS 313-11798	E ZI 100	China	Indica	Xian
IRIS 313-11799	E ZI 110	China	Indica	Xian
IRIS 313-11801	FAN WU	China	Indica	Xian
IRIS 313-11804	QUN XUAN ZAO	China	Indica	Xian
IRIS 313-11806	78 XUAN WU	China	Indica	Xian
IRIS 313-11807	R 582	Colombia	Indica	Xian
IRIS 313-11808	R 762	Colombia	Aus/boro	Xian
IRIS 313-11865	HUO QING	China	Indica	Xian
IRIS 313-11866	JIANG ER ZAO	China	Indica	Xian
IRIS 313-11886	IR 4683-54-2	Philippines	Indica	Xian
IRIS 313-11887	IR 19058-107-1	Philippines	Indica	Xian
IRIS 313-11937	KUNJUKUNJU	India	Indica	Xian
IRIS 313-11941	MOUI SAMBA	Burkina Fasso	Indica	Xian
IRIS 313-11960	PORONG	Indonesia	Indica	Xian
IRIS 313-11963	KARANGI	India	Aus/boro	Xian
IRIS 313-11965	GUANG XUAN LIU HAO	China	Indica	Xian
IRIS 313-11968	ZHAO DAN AI	China	Indica	Xian
IRIS 313-11979	IR 19661-364-1-2-3	Philippines	Indica	Xian
IRIS 313-11980	HSINCHU AI CHIO CHIENG	Taiwan	Indica	Xian
IRIS 313-11986	LIANG GUANG	China	Indica	Xian
IRIS 313-11987	IR 10120-7-2-1-4	Philippines	Indica	Xian
IRIS 313-11990	TAISEN GLUTINOUS YU 1157	Taiwan	Indica	Xian
IRIS 313-11991	CHON	Laos	Indica	Xian
IRIS 313-11992	Chao lao soung	Laos	Indica	Xian
IRIS 313-12043	SAMBOK ANGKRANG	Cambodia	Indica	Xian
IRIS 313-12067		Philippines	Indica	Xian
IRIS 313-12128	Hma gneng	Laos	Indica	Xian
IRIS 313-12135	PERUBAK LUEY	Malaysia	Indica	Xian
IRIS 313-12229	TAM	Laos	Indica	Xian
IRIS 313-12232	TE SAN AI 2	China	Indica	Xian
IRIS 313-12249	DAMNOUEB PHDAU PEN	Cambodia	Indica	Xian
IRIS 313-12273	AIJIAONANTE	China	Indica	Xian
IRIS 313-12334	Do khaw	Laos	Indica	Xian
IRIS 313-12355	Nasaeng	Laos	Indica	Xian
IRIS 313-15896	FEDEARROZ 50	Colombia	Indica	Xian
IRIS 313-15897	SANHUANGZHAN NO 2	China	Indica	Xian
IRIS 313-15900	IR 84196-12-32(SAMBHA MAHSURI + SUB1)	Philippines	Indica	Xian
IRIS 313-15901	IR 77298-14-1-2-10	Philippines	Indica	Xian
IRIS 313-15906	IR 73571-3B-11-3-K2	Philippines	Indica	Xian
IRIS 313-7636	ADNY 11	Mali	Indica	Xian
IRIS 313-7654	BOUAKE 189	Ivory Coast	Indica	Xian
IRIS 313-7664	CICA 8	Colombia	Tropical japonica	Xian
IRIS 313-7665	CT 6510-24-1-2	Colombia	Indica	Xian
IRIS 313-7668	DANAU LAUT TAWAR	Indonesia	Indica	Xian
IRIS 313-7684	IR 1561-228-3-3	Philippines	Indica	Xian
IRIS 313-7691	IR 28	Philippines	Indica	Xian
IRIS 313-7766	SAHEL 108	Senegal	Indica	Xian
IRIS 313-7770	SAMBALA MALO	Mali	Indica	Xian
IRIS 313-7773	SEBERANG MR77	Mali	Indica	Xian
IRIS 313-7780	SONA(IET 1991)	India	Indica	Xian
IRIS 313-7797	UPL RI-7	Philippines	Intermediate type	Xian
IRIS 313-7807	WAS 170-B-B-1-1	Senegal	Indica	Xian
IRIS 313-7808	WAS 173-B-B-6-2-2	Senegal	Indica	Xian
IRIS 313-7809	WAS 174-B-3-5	Senegal	Indica	Xian
IRIS 313-7815	WAS 198-B-3-1-3	Senegal	Indica	Xian
IRIS 313-7820	WAS 206-B-B-2-2-1	Senegal	Indica	Xian
IRIS 313-7824	WAS 21-B-B-20-4-3-3	Senegal	Indica	Xian
IRIS 313-7826	WAS 33-B-B-15-1-4-5	Senegal	Indica	Xian
IRIS 313-7832	WAS 63-22-5-9-10-1	Senegal	Indica	Xian
IRIS 313-7911	IR 72967-12-2-3	Philippines	Tropical japonica	Xian
IRIS 313-8067	MEDUSA	Italy	Temperate japonica	Xian
IRIS 313-8068	ORIONE	Italy	Temperate japonica	Xian
IRIS 313-8212	GIZA 178	Egypt	Indica	Xian
IRIS 313-8265	CO 39	India	Indica	Xian
IRIS 313-8392	IR 2003-P7-7-4-2	Philippines	Indica	Xian
IRIS 313-8398	KHARSU 80	Pakistan	Aus/boro	Xian
IRIS 313-8412	FEI GAI 122	China	Indica	Xian
IRIS 313-8433	CHANG LE SAN SHU ZAO	China	Indica	Xian
IRIS 313-8514	DAA MANSA	Ghana	Indica	Xian
IRIS 313-8568	LARHA MUGAD	India	Indica	Xian
IRIS 313-8621	ARC 11663	India	Indica	Xian
IRIS 313-8660	KOTTEYARAN	Sri Lanka	Indica	Xian
IRIS 313-8674	HAWM KRUA	Thailand	Indica	Xian
IRIS 313-8859	E ZI 96	China	Intermediate type	Xian
IRIS 313-8903	BPI 76 NON-SENSITIVE(GREEN)	Philippines	Indica	Xian
IRIS 313-8932	PATISAIL	Bangladesh	Indica	Xian
IRIS 313-8940	FU ZAO XIAN	China	Indica	Xian
IRIS 313-9023	CR60-10	India	Indica	Xian
IRIS 313-9032	KHAO GRADOOK CHAHNG	Thailand	Indica	Xian
IRIS 313-9065	PAI-CHUEH-CHIU-LIU	China	Indica	Xian
IRIS 313-9111	XIA-ZHI-BAI	China	Indica	Xian
IRIS 313-9187	WANGKOD	Malaysia	Tropical japonica	Xian
IRIS 313-9227	WP65	Thailand	Indica	Xian
IRIS 313-9253	YONG JIN ZAO 3	China	Indica	Xian
IRIS 313-9384	BARIK KUDI	India	Indica	Xian
IRIS 313-9388	VARY MALADY MENA	Madagascar	Indica	Xian
IRIS 313-9464	SML ACORNI	Suriname	Tropical japonica	Xian
IRIS 313-9482	E 2024	China	Indica	Xian
IRIS 313-9503	BINUHANGIN	Philippines	Intermediate type	Xian
IRIS 313-9522	RPW9-4(SS1)	India	Indica	Xian
IRIS 313-9566	RP9-4	India	Indica	Xian
IRIS 313-9570	NX 3533	China	Indica	Xian
IRIS 313-9604	RPA5929(K 45)	India	Indica	Xian
IRIS 313-9623	PESAGRO 102	Brazil	Indica	Xian
IRIS 313-9841	SML AWINI	Suriname	Indica	Xian
IRIS 313-9917	CHANDINA	Sri Lanka	Indica	Xian
IRIS 313-9922	IRI 339	South Korea	Indica	Xian
IRIS 313-9925	MILYANG 30	South Korea	Indica	Xian
IRIS 313-9939	CIWINI SML	Suriname	Basmati/sadri	Xian
IRIS 313-9940	TIKAL 3	Guatemala	Indica	Xian
IRIS 313-9953	BAMOA A75	Mexico	Indica	Xian
IRIS 313-9966	CICA 9	Colombia	Indica	Xian
IRIS 313-9970	RACE PERUMAL	Sri Lanka	Indica	Xian
B001	Heibiao	China	Temperate japonica	Geng
B002	Sansuijin	China	Temperate japonica	Geng
B004	Qiuguangtengxi 104	Japan	Temperate japonica	Geng
B005	Wanshi	Japan	Temperate japonica	Geng
B023	Gaoliqiu	North Korea	Temperate japonica	Geng
B038	Nabated A Smar	Egypt	Temperate japonica	Geng
B043	YR 83-23-11	Australia	Tropical japonica	Geng
B045	Gongchengxiang	Japan	Temperate japonica	Geng
B046	Qiutianxiaoting	Japan	Temperate japonica	Geng
B047	Zhenfu 8	Japan	Intermediate type	Geng
B053	80A97YR303-304-1-3	Australia	Tropical japonica	Geng
B054	80050YR72136-43	Australia	Tropical japonica	Geng
B055	YR196	Australia	japonica	Geng
B068	Gaoyangdiandao dahongmang	China	Temperate japonica	Geng
B071	Muxiqiu	China	Temperate japonica	Geng
B084	Bawangbian 1	China	Intermediate type	Geng
B122	Liaogeng 287	China	Temperate japonica	Geng
B144	Huhui 628	China	japonica	Geng
B152	Zaoshunonghu 6	China	Intermediate type	Geng
B154	Liming B	China	Temperate japonica	Geng
B166	Jianghuadao	North Korea	Temperate japonica	Geng
B168	Zhuyuan	Japan	Temperate japonica	Geng
B169	Ailuyu	Japan	Temperate japonica	Geng
B170	Hongse 90	Russia	Temperate japonica	Geng
B171	Linguo	Italy	Temperate japonica	Geng
B182	Chimao	Japan	Temperate japonica	Geng
B183	Qingnuo Kyohatamochi	Japan	Temperate japonica	Geng
B205	Cunsanli	China	Temperate japonica	Geng
B263	Weiguo	China	Temperate japonica	Geng
B266	Haomake (K)	China	Tropical japonica	Geng
CX110	UP15	Japan	Aromatic (basmati/sandri type	Geng
CX138	Qd_441	China	japonica	Geng
CX139	Amareles	Portugal	japonica	Geng
CX140	Nipponbare	Japan	Temperate japonica	Geng
CX142	Ai Yeh Lu	China	Temperate japonica	Geng
CX149	Karnal Local	India	Aromatic (basmati/sandri type	Geng
CX16	Yuan jing 7	China	Temperate japonica	Geng
CX165	Wuyugeng 3	China	Temperate japonica	Geng
CX205	IR69428-6-1-1-3-3	Phillipines	japonica	Geng
CX211	M3122	China	Temperate japonica	Geng
CX212	Nongken 58	Japan	Temperate japonica	Geng
CX213	Chennong 89366	China	Temperate japonica	Geng
CX220	IRAT109	Brazil	Tropical japonica	Geng
CX251	Xudao 4	China	japonica	Geng
CX277	02428-IL	China	japonica	Geng
CX284	Han 502	China	Intermediate type	Geng
CX287	C52	China	japonica	Geng
CX306	Mongolia Rice	China	Temperate japonica	Geng
CX307	HP121	China	Intermediate type	Geng
CX315	Zidao	North Korea	Temperate japonica	Geng
CX316	MR39	China	Indica	Geng
CX317	MR19	China	Intermediate type	Geng
CX32	Manauthukha	Myanmar	japonica	Geng
CX329	Jinchuanyihao	China	Temperate japonica	Geng
CX330	Yueguang	Japan	Intermediate type	Geng
CX344	Hexi 41	China	Temperate japonica	Geng
CX345	Yungeng 23	China	Temperate japonica	Geng
CX350	Wuyugeng 20	China	Temperate japonica	Geng
CX351	053A-3	China	japonica	Geng
CX352	BD007	China	Intermediate type	Geng
CX353	CAU1	China	japonica	Geng
CX354	CAU2	China	Temperate japonica	Geng
CX355	Yunlu 102	China	japonica	Geng
CX356	Yandao 8	China	Temperate japonica	Geng
CX359	Yunlu 103	China	Tropical japonica	Geng
CX371	NERICA 1	Africa	japonica	Geng
CX372	NERICA 2	Africa	Intermediate type	Geng
CX373	NERICA 8	Africa	Tropical japonica	Geng
CX374	NERICA 9	Africa	Tropical japonica	Geng
CX380	Yandao 9	China	Temperate japonica	Geng
CX389	Jinyuan 85	China	japonica	Geng
CX391	YJ30	China	Temperate japonica	Geng
CX396	Guandong 194（Soft Rice）	Japan	Temperate japonica	Geng
CX397	Nangeng 46（Soft Rice）	China	Temperate japonica	Geng
CX534	Tongnian 1	China	Temperate japonica	Geng
CX56	Yunguang 8	China	Temperate japonica	Geng
CX57	Zhongchao 123	China	Intermediate type	Geng
CX58	Giza159	Egypt	Temperate japonica	Geng
CX6	C418	China	Intermediate type	Geng
CX74	JP-5	Pakistan	Intermediate type	Geng
CX78	M401	United States	Temperate japonica	Geng
IRIS 313-10056	HOKURIKU 52	Japan	Temperate japonica	Geng
IRIS 313-10059	DACHEONGBYEO	South Korea	Temperate japonica	Geng
IRIS 313-10061	ESTRELA A	Portugal	Japonica	Geng
IRIS 313-10062	REA	Greece	Japonica	Geng
IRIS 313-10067	JEONBUKGUNGWEONNA	South Korea	Japonica	Geng
IRIS 313-10074	RIKU AIKOKU	Japan	Japonica	Geng
IRIS 313-10078	YOSHINO MOCHI	Japan	Japonica	Geng
IRIS 313-10079	DANGO MOCHI	Japan	Japonica	Geng
IRIS 313-10080	HIRAKAWA OKUTE	Japan	Japonica	Geng
IRIS 313-10082	KYUUSHUU	Japan	Japonica	Geng
IRIS 313-10083	BETIS	Spain	Temperate japonica	Geng
IRIS 313-10084	SENIA	Spain	Temperate japonica	Geng
IRIS 313-10089	KALIN	Bulgaria	Temperate japonica	Geng
IRIS 313-10097	MAEKJO	South Korea	Temperate japonica	Geng
IRIS 313-10295	PDR 34-2-1-2	Pakistan	Indica	Geng
IRIS 313-10373	IR 68333-R-R-B-19	Philippines	Tropical japonica	Geng
IRIS 313-10379	IR 73688-57-2	Philippines	Temperate japonica	Geng
IRIS 313-10430	GINMASARI	Japan	Temperate japonica	Geng
IRIS 313-10469	KINUGASAWASE	Japan	Temperate japonica	Geng
IRIS 313-10558	LITCHIKIANG	China	Temperate japonica	Geng
IRIS 313-10564	250 KUNGANI 1	Japan	Temperate japonica	Geng
IRIS 313-10568	OITA-MII 120	Japan	Temperate japonica	Geng
IRIS 313-10569	BEN-KEI	Japan	Temperate japonica	Geng
IRIS 313-10570	CHUSEI HONEN	Japan	Temperate japonica	Geng
IRIS 313-10583	TSAO-SIAO-PEH-TAO	China	Temperate japonica	Geng
IRIS 313-10618	CHINES		Temperate japonica	Geng
IRIS 313-10631	SHINCHIKU-IKU 97	Taiwan	Temperate japonica	Geng
IRIS 313-10677	DEWAMINORI	Japan	Temperate japonica	Geng
IRIS 313-10840	YE ZO	South Korea	Temperate japonica	Geng
IRIS 313-10865	ARC 11424	India	Tropical japonica	Geng
IRIS 313-11093	KHAO TAM	Laos	Tropical japonica	Geng
IRIS 313-11153	CT45	India	Japonica	Geng
IRIS 313-11155	K 113	India	Temperate japonica	Geng
IRIS 313-11156		India	Tropical japonica	Geng
IRIS 313-11424	SINAPLED	Philippines	Tropical japonica	Geng
IRIS 313-11465	DINORADO	Philippines	Indica	Geng
IRIS 313-11536		Georgia	Tropical japonica	Geng
IRIS 313-11571	BAI MANG AI ZHONG	China	Indica	Geng
IRIS 313-11584	YI SUI QI	China	Indica	Geng
IRIS 313-11651	FEI ZHAO 12	China	Temperate japonica	Geng
IRIS 313-11652	GONG SHE 9	China	Temperate japonica	Geng
IRIS 313-11653	MA SHE 8	China	Temperate japonica	Geng
IRIS 313-11654	PL 3165	China	Indica	Geng
IRIS 313-11655	SI WAN 14	China	Indica	Geng
IRIS 313-11689	DECHANGBYEO	South Korea	Intermediate type	Geng
IRIS 313-11698	TAIPEI 167	Taiwan	Indica	Geng
IRIS 313-11702	CN1067	United States	Indica	Geng
IRIS 313-11725	ZUIHOU	Japan	Indica	Geng
IRIS 313-11739	NAKPUI	Ghana	Indica	Geng
IRIS 313-11829	MUNJI	Pakistan	Indica	Geng
IRIS 313-11890	C 722323	Taiwan	Temperate japonica	Geng
IRIS 313-11915	IB95	Ghana	Tropical japonica	Geng
IRIS 313-12054	HUA 24	China	Temperate japonica	Geng
IRIS 313-12060	LIJIAN 942	China	Temperate japonica	Geng
IRIS 313-12061	YUNLEN 13	China	Temperate japonica	Geng
IRIS 313-12217	WEONJU 8	South Korea	Temperate japonica	Geng
IRIS 313-12227	Set	Laos	Tropical japonica	Geng
IRIS 313-12271	BATIBATIKAN	Philippines	Tropical japonica	Geng
IRIS 313-15905	WAB 56-125	Ivory Coast	Tropical japonica	Geng
IRIS 313-15907	INIA TACUARI	Uruguay	Tropical japonica	Geng
IRIS 313-7863	CIRAD 403		Indica	Geng
IRIS 313-7866	CNA-7\BO\1\1>33-13-6-1	Colombia	Tropical japonica	Geng
IRIS 313-7868	CT13582-15-5-M	Colombia	Tropical japonica	Geng
IRIS 313-7902	IR 63380-16	Philippines	Tropical japonica	Geng
IRIS 313-7907	IR 68704-145-1-1-B	Philippines	Tropical japonica	Geng
IRIS 313-7912	IRAT 104	Ivory Coast	Tropical japonica	Geng
IRIS 313-7924	IRAT 335	Bolivia	Japonica	Geng
IRIS 313-8010	IR 71524-44-1-1	Philippines	Tropical japonica	Geng
IRIS 313-8023	RIZZOTTO 51-1	Italy	Temperate japonica	Geng
IRIS 313-8024	RIBE 253	Italy	Temperate japonica	Geng
IRIS 313-8025	ITALPATNA 48	Italy	Temperate japonica	Geng
IRIS 313-8027	ANSEATICO	Italy	Tropical japonica	Geng
IRIS 313-8031	RUBINO	Italy	Tropical japonica	Geng
IRIS 313-8032	PIEMONTE	Italy	Temperate japonica	Geng
IRIS 313-8033	LOMELLINO	Italy	Temperate japonica	Geng
IRIS 313-8044	GOLFO	Italy	Temperate japonica	Geng
IRIS 313-8048	RONCOLO	Italy	Temperate japonica	Geng
IRIS 313-8050	MIARA	Italy	Japonica	Geng
IRIS 313-8052	SMERALDO	Italy	Tropical japonica	Geng
IRIS 313-8053	RUBIDIO	Italy	Temperate japonica	Geng
IRIS 313-8057	79 UPLA	Argentina	Japonica	Geng
IRIS 313-8058	91 UPLA	Argentina	Temperate japonica	Geng
IRIS 313-8060	77 UPLA	Argentina	Japonica	Geng
IRIS 313-8061	75 UPLA	Argentina	Japonica	Geng
IRIS 313-8063	104 UPLA	Argentina	Indica	Geng
IRIS 313-8064	32 UPLA	Argentina	Japonica	Geng
IRIS 313-8065	SAMBA	Italy	Temperate japonica	Geng
IRIS 313-8066	GHIBLI	Italy	Temperate japonica	Geng
IRIS 313-8074	GOOLARAH	Australia	Temperate japonica	Geng
IRIS 313-8085	CLOT	Spain	Temperate japonica	Geng
IRIS 313-8087	FRANCES	Spain	Temperate japonica	Geng
IRIS 313-8090	MARENY	Spain	Temperate japonica	Geng
IRIS 313-8095	SHSS 53	Spain	Tropical japonica	Geng
IRIS 313-8096	SR 113	Spain	Temperate japonica	Geng
IRIS 313-8099	FLIPPER	Italy	Temperate japonica	Geng
IRIS 313-8105	THAIPERLA	United States	Temperate japonica	Geng
IRIS 313-8109	CAMPINO	Portugal	Tropical japonica	Geng
IRIS 313-8111	CARRICO	Portugal	Temperate japonica	Geng
IRIS 313-8112	CHIPKA	Bulgaria	Temperate japonica	Geng
IRIS 313-8113	ESCARLATE	Portugal	Temperate japonica	Geng
IRIS 313-8114	FAISCA	Portugal	Temperate japonica	Geng
IRIS 313-8115	FAMILIA 181	Portugal	Temperate japonica	Geng
IRIS 313-8119	JUBILIENI	Bulgaria	Temperate japonica	Geng
IRIS 313-8121	MESTRE	Italy	Temperate japonica	Geng
IRIS 313-8123	MUGA	Portugal	Temperate japonica	Geng
IRIS 313-8129	RODINA	Bulgaria	Temperate japonica	Geng
IRIS 313-8134	S 102-2	Portugal	Tropical japonica	Geng
IRIS 313-8135	SAEDINENIE	Bulgaria	Tropical japonica	Geng
IRIS 313-8138	SALOIO	Portugal	Temperate japonica	Geng
IRIS 313-8142	SETTANTUNO	Portugal	Temperate japonica	Geng
IRIS 313-8143	SLAVA	Bulgaria	Indica	Geng
IRIS 313-8145	SUPER	Portugal	Temperate japonica	Geng
IRIS 313-8148	TIMICH 108	Romania	Temperate japonica	Geng
IRIS 313-8155	KULON	Russia	Tropical japonica	Geng
IRIS 313-8158	CT 23	Colombia	Temperate japonica	Geng
IRIS 313-8160	CT 58	Colombia	Japonica	Geng
IRIS 313-8164	YRM 6-2	Australia	Japonica	Geng
IRIS 313-8165	CIGALON	France	Temperate japonica	Geng
IRIS 313-8166	CALENDAL	France	Temperate japonica	Geng
IRIS 313-8167	DELTA	France	Indica	Geng
IRIS 313-8170	MEJANES 2	France	Tropical japonica	Geng
IRIS 313-8172	FIDJI	Philippines	Indica	Geng
IRIS 313-8173	A 201	United States	Temperate japonica	Geng
IRIS 313-8177	AUGUSTO	Italy	Temperate japonica	Geng
IRIS 313-8180	DELLMONT	United States	Temperate japonica	Geng
IRIS 313-8184	FRAGRANCE	Italy	Indica	Geng
IRIS 313-8185	GLADIO	Italy	Indica	Geng
IRIS 313-8186	JACINTO	United States	Temperate japonica	Geng
IRIS 313-8192	L 205	United States	Temperate japonica	Geng
IRIS 313-8193	LACASSINE	United States	Japonica	Geng
IRIS 313-8195	LUXOR	Italy	Temperate japonica	Geng
IRIS 313-8200	OPALE	Italy	Temperate japonica	Geng
IRIS 313-8202	REXMONT	United States	Temperate japonica	Geng
IRIS 313-8204	S 102	United States	Temperate japonica	Geng
IRIS 313-8208	LUSITO IRRADIADO 859-85-2	Portugal	Temperate japonica	Geng
IRIS 313-8209	ALEXANDROS	Greece	Temperate japonica	Geng
IRIS 313-8213	GRAAL	France	Tropical japonica	Geng
IRIS 313-8214	MELAS	Greece	Temperate japonica	Geng
IRIS 313-8216	ROXANI	Greece	Indica	Geng
IRIS 313-8217	SAKHA 102	Egypt	Japonica	Geng
IRIS 313-8218	SAKHA 103	Egypt	Aus/boro	Geng
IRIS 313-8285	KATY	United States	Tropical japonica	Geng
IRIS 313-8339	BOND	United States	Japonica	Geng
IRIS 313-8399	68-2	France	Temperate japonica	Geng
IRIS 313-8400	RIKUTO NORIN MOCHI 20	Japan	Tropical japonica	Geng
IRIS 313-8481	DAN-YAN-NUO	China	Temperate japonica	Geng
IRIS 313-8658	CP231	United States	Tropical japonica	Geng
IRIS 313-8665	M 7	United States	Temperate japonica	Geng
IRIS 313-8669	CALROSE 76	United States	Temperate japonica	Geng
IRIS 313-8923	CALIFORNIA BELLE	United States	Basmati/sadri	Geng
IRIS 313-8976	SKY BONNET	United States	Tropical japonica	Geng
IRIS 313-9002	KOTOBUKI MOCHI	Japan	Temperate japonica	Geng
IRIS 313-9081	TAKAO MOCHI	Japan	Tropical japonica	Geng
IRIS 313-9140	81 A 32	China	Intermediate type	Geng
IRIS 313-9228	HOKUSETSU	Japan	Temperate japonica	Geng
IRIS 313-9346	SHINCHIKU-IKU 103	Taiwan	Temperate japonica	Geng
IRIS 313-9379	HWANGJO	South Korea	Temperate japonica	Geng
IRIS 313-9410	CA2914A(SEL2400)/CALO	United States	Temperate japonica	Geng
IRIS 313-9423	AGUYOD	Philippines	Tropical japonica	Geng
IRIS 313-9463	CI 1600	United States	Temperate japonica	Geng
IRIS 313-9491	BLUE BELLE	United States	Temperate japonica	Geng
IRIS 313-9523	RIKUTO KEMOCHI	Japan	Japonica	Geng
IRIS 313-9701	TAICHUNG 65	Taiwan	Temperate japonica	Geng
IRIS 313-9702	TAICHUNG 179	Taiwan	Temperate japonica	Geng
IRIS 313-9724	AI DA ZHONG	China	Temperate japonica	Geng
IRIS 313-9725	DA DAO TOU	China	Temperate japonica	Geng
IRIS 313-9769	MURASAHITSUTSURI	Japan	Temperate japonica	Geng
IRIS 313-9771	BERGREIS	Austria	Tropical japonica	Geng
IRIS 313-9774	EGYPTIAN	Turkey	Temperate japonica	Geng
IRIS 313-9782	BENLLOK	Peru	Temperate japonica	Geng
IRIS 313-9789	RIKUTO TAUKI MOCHI 27	Japan	Tropical japonica	Geng
IRIS 313-9790	JAPONES BALILLA	Uruguay	Temperate japonica	Geng
IRIS 313-9811	KOPANCSI KEREK	Hungary	Tropical japonica	Geng
IRIS 313-9814	AMARELO	Hungary	Intermediate type	Geng
IRIS 313-9838	TEPUKE	New Zealand	Temperate japonica	Geng
IRIS 313-9880	SZEGEDI SZAKALLAS 28	Hungary	Tropical japonica	Geng
IRIS 313-9884	FUKUSHIMA-MOCHI(GLUT.)	Japan	Temperate japonica	Geng
IRIS 313-9886	HUK ZO	South Korea	Temperate japonica	Geng
IRIS 313-9937	ROCCA	Italy	Aus/boro	Geng
IRIS 313-9961	WIR884	Norway	Temperate japonica	Geng
IRIS 313-9964	WIR1951	Georgia	Temperate japonica	Geng
IRIS 313-9974	HEUKSANJO	South Korea	Temperate japonica	Geng
IRIS 313-9995	NONGLIMNA 1	South Korea	Temperate japonica	Geng
IRIS 313-9996	SUWEON 295	South Korea	Tropical japonica	Geng

## Sheet: Table S2
Table S2 All identified marker-trait associatioins and the corresponding annoatated genes
MSU	Symbol	Function	Chr	Start	End	rs.	alleles	Chromosome	Position	P.value	maf	nobs	Rsquare.of.Model.without.SNP	Rsquare.of.Model.with.SNP	effect	Trait	Group	Env
LOC_Os01g01484	OsDET1	light-mediated development protein DET1, putative, expressed	1	248706	256878	S1_254527	A/C	1	254527	8.10112e-05	0.365385	416	0.0825746	0.117872	-0.0192866	SE	Group2	Seedling
LOC_Os01g40930	NA	expressed protein	1	23153160	23156321	S1_23153509	G/C	1	23153509	3.02893e-05	0.0521236	259	0.0749619	0.140425	-0.0303622	SE	Group1	Seedling
LOC_Os01g41360	NA	expressed protein	1	23402326	23404122	S1_23402523	A/G	1	23402523	1.54938e-05	0.0501931	259	0.0749619	0.145406	-0.175396	SE	Group1	Seedling
LOC_Os01g41360	NA	expressed protein	1	23402326	23404122	S1_23402810	T/G	1	23402810	7.54887e-05	0.0540541	259	0.0749619	0.133707	-0.0215273	SE	Group1	Seedling
LOC_Os01g41360	NA	expressed protein	1	23402326	23404122	S1_23402819	T/A	1	23402819	7.54887e-05	0.0540541	259	0.0749619	0.133707	NA	SE	Group1	Seedling
LOC_Os02g01700	NA	RNA recognition motif containing protein, putative, expressed	2	385738	386864	S2_386315	G/C	2	386315	9.98243e-05	0.0540541	259	0.0749619	0.131668	1.11958	SE	Group1	Seedling
LOC_Os02g09270	NA	cytochrome P450 71A1, putative, expressed	2	4774336	4776362	S2_4774596	T/C	2	4774596	7.99199e-05	0.128425	292	0.0688976	0.120684	0.202541	SSD	Group2	Seedling
LOC_Os02g11960	NA	ABC transporter, ATP-binding protein, putative, expressed	2	6197353	6204374	S2_6203170	A/T	2	6203170	4.91852e-05	0.144231	416	0.0825746	0.120062	0.146585	SE	Group2	Seedling
LOC_Os02g16030	NA	harpin-induced protein 1 domain containing protein, expressed	2	9106572	9111711	S2_9109018	A/T	2	9109018	3.21535e-05	0.0830116	259	0.0749619	0.139983	-0.275708	SE	Group1	Seedling
LOC_Os02g16030	NA	harpin-induced protein 1 domain containing protein, expressed	2	9106572	9111711	S2_9109169	A/C	2	9109169	3.37458e-05	0.100386	259	0.0749619	0.139626	-0.333447	SE	Group1	Seedling
LOC_Os02g16030	NA	harpin-induced protein 1 domain containing protein, expressed	2	9106572	9111711	S2_9111310	T/C	2	9111310	6.00205e-05	0.0675676	259	0.0749619	0.135387	-0.110703	SE	Group1	Seedling
LOC_Os02g16490	NA	expressed protein	2	9409107	9413648	S2_9411174	C/A	2	9411174	7.82058e-05	0.0772201	259	0.0749619	0.133449	-0.21062	SE	Group1	Seedling
LOC_Os02g32460	NA	ThiF family domain containing protein, putative, expressed	2	19192500	19197127	S2_19192754	A/G	2	19192754	5.98136e-05	0.194712	416	0.0825746	0.119202	-0.0623831	SE	Group2	Seedling
LOC_Os02g47480	NA	expressed protein	2	29003343	29015194	S2_29007870	T/C	2	29007870	3.05794e-05	0.121394	416	0.0825746	0.122158	0.357272	SE	Group2	Seedling
LOC_Os02g47510	OsNCED1	9-cis-epoxycarotenoid dioxygenase 1, chloroplast precursor, putative, expressed	2	29026070	29028259	S2_29027975	A/G	2	29027975	7.13748e-05	0.13101	416	0.0825746	0.118427	-0.143571	SE	Group2	Seedling
LOC_Os02g47570	NA	phosphatase, putative, expressed	2	29069440	29072124	S2_29071068	T/A	2	29071068	7.85514e-05	0.110577	416	0.0825746	0.118007	-0.189447	SE	Group2	Seedling
LOC_Os02g47600	NA	soluble inorganic pyrophosphatase, putative, expressed	2	29081821	29086715	S2_29085092	A/G	2	29085092	4.99054e-05	0.112981	416	0.0825746	0.119998	0.176522	SE	Group2	Seedling
LOC_Os02g56280	NA	zinc finger family protein, putative, expressed	2	34439761	34444762	S2_34442382	G/C	2	34442382	5.95549e-05	0.202055	292	0.0688976	0.122589	0.0860049	SSD	Group2	Seedling
LOC_Os02g56310	NA	calcium-dependent protein kinase isoform AK1, putative, expressed	2	34468752	34470197	S2_34468810	T/C	2	34468810	7.9042e-05	0.226027	292	0.0688976	0.120756	-0.195956	SSD	Group2	Seedling
LOC_Os02g56310	NA	calcium-dependent protein kinase isoform AK1, putative, expressed	2	34468752	34470197	S2_34468853	T/C	2	34468853	9.33704e-05	0.229452	292	0.0688976	0.11968	0.0981507	SSD	Group2	Seedling
LOC_Os02g56310	NA	calcium-dependent protein kinase isoform AK1, putative, expressed	2	34468752	34470197	S2_34468974	G/C	2	34468974	6.81446e-05	0.229452	292	0.0688976	0.121716	0.0131044	SSD	Group2	Seedling
LOC_Os02g56310	NA	calcium-dependent protein kinase isoform AK1, putative, expressed	2	34468752	34470197	S2_34469197	G/A	2	34469197	5.26483e-05	0.231164	292	0.0688976	0.12339	-0.475523	SSD	Group2	Seedling
LOC_Os02g56310	NA	calcium-dependent protein kinase isoform AK1, putative, expressed	2	34468752	34470197	S2_34469239	G/A	2	34469239	8.72152e-05	0.234589	292	0.0688976	0.12012	0.0821009	SSD	Group2	Seedling
LOC_Os02g56310	NA	calcium-dependent protein kinase isoform AK1, putative, expressed	2	34468752	34470197	S2_34469258	C/T	2	34469258	3.49929e-05	0.229452	292	0.0688976	0.126051	0.154942	SSD	Group2	Seedling
LOC_Os02g56310	NA	calcium-dependent protein kinase isoform AK1, putative, expressed	2	34468752	34470197	S2_34469304	C/T	2	34469304	5.00071e-05	0.231164	292	0.0688976	0.123724	-0.37999	SSD	Group2	Seedling
LOC_Os02g56310	NA	calcium-dependent protein kinase isoform AK1, putative, expressed	2	34468752	34470197	S2_34469328	T/C	2	34469328	3.22573e-05	0.231164	292	0.0688976	0.126583	-0.363801	SSD	Group2	Seedling
LOC_Os02g56310	NA	calcium-dependent protein kinase isoform AK1, putative, expressed	2	34468752	34470197	S2_34469697	T/C	2	34469697	1.02606e-05	0.248288	292	0.0688976	0.134118	-0.126537	SSD	Group2	Seedling
LOC_Os02g56310	NA	calcium-dependent protein kinase isoform AK1, putative, expressed	2	34468752	34470197	S2_34469718	C/G	2	34469718	3.24417e-05	0.239726	292	0.0688976	0.126545	-0.340503	SSD	Group2	Seedling
LOC_Os02g56310	NA	calcium-dependent protein kinase isoform AK1, putative, expressed	2	34468752	34470197	S2_34469721	G/C	2	34469721	9.92398e-05	0.248288	292	0.0688976	0.119287	-0.0165465	SSD	Group2	Seedling
LOC_Os02g56334	NA	OsWAK18b - OsWAK short gene, expressed	2	34483996	34486095	S2_34484322	T/C	2	34484322	4.14859e-05	0.205479	292	0.0688976	0.12494	0.0349793	SSD	Group2	Seedling
LOC_Os02g56510	OsPHO1;2	phosphate transporter 1, putative, expressed	2	34609408	34615666	S2_34612222	A/T	2	34612222	4.5159e-05	0.472603	292	0.0688976	0.124388	0.331707	SSD	Group2	Seedling
LOC_Os02g56520	NA	expressed protein	2	34614570	34618723	S2_34615610	A/C	2	34615610	9.25012e-05	0.347603	292	0.0688976	0.11974	0.0872326	SSD	Group2	Seedling
LOC_Os02g57140	NA	expressed protein	2	34991200	34996641	S2_34993495	G/T	2	34993495	7.36369e-05	0.34589	292	0.0688976	0.121214	0.0786387	SSD	Group2	Seedling
LOC_Os02g57150	NA	tubulin-specific chaperone A, putative, expressed	2	35002742	35004795	S2_35003498	G/A	2	35003498	5.13653e-05	0.333904	292	0.0688976	0.12355	-0.627289	SSD	Group2	Seedling
LOC_Os02g57150	NA	tubulin-specific chaperone A, putative, expressed	2	35002742	35004795	S2_35003552	T/A	2	35003552	8.8283e-05	0.339041	292	0.0688976	0.120042	-0.0857682	SSD	Group2	Seedling
LOC_Os02g57160	NA	ELMO/CED-12 family protein, putative, expressed	2	35004914	35009538	S2_35005168	C/T	2	35005168	6.67327e-05	0.342466	292	0.0688976	0.121852	0.139698	SSD	Group2	Seedling
LOC_Os02g57160	NA	ELMO/CED-12 family protein, putative, expressed	2	35004914	35009538	S2_35005521	A/T	2	35005521	7.26583e-05	0.337329	292	0.0688976	0.121301	0.186931	SSD	Group2	Seedling
LOC_Os02g57160	NA	ELMO/CED-12 family protein, putative, expressed	2	35004914	35009538	S2_35006334	A/G	2	35006334	8.43192e-05	0.342466	292	0.0688976	0.120338	-0.123187	SSD	Group2	Seedling
LOC_Os02g57170	NA	expressed protein	2	35011392	35013385	S2_35011885	T/C	2	35011885	6.6394e-05	0.337329	292	0.0688976	0.121885	-0.0433274	SSD	Group2	Seedling
LOC_Os02g57170	NA	expressed protein	2	35011392	35013385	S2_35011925	G/A	2	35011925	9.9113e-05	0.339041	292	0.0688976	0.119295	-0.0191213	SSD	Group2	Seedling
LOC_Os02g57170	NA	expressed protein	2	35011392	35013385	S2_35012132	T/G	2	35012132	7.44788e-05	0.344178	292	0.0688976	0.121141	0.0510491	SSD	Group2	Seedling
LOC_Os02g57180	NA	NADH dehydrogenase 1 alpha subcomplex subunit 9,mitochondrial precursor, putative, expressed	2	35013566	35017652	S2_35015204	A/G	2	35015204	7.76131e-05	0.340753	292	0.0688976	0.120874	-0.0337405	SSD	Group2	Seedling
LOC_Os02g57180	NA	NADH dehydrogenase 1 alpha subcomplex subunit 9,mitochondrial precursor, putative, expressed	2	35013566	35017652	S2_35015996	T/C	2	35015996	9.62194e-05	0.344178	292	0.0688976	0.119486	-0.0455542	SSD	Group2	Seedling
LOC_Os02g57180	NA	NADH dehydrogenase 1 alpha subcomplex subunit 9,mitochondrial precursor, putative, expressed	2	35013566	35017652	S2_35016392	C/T	2	35016392	8.33912e-05	0.297945	292	0.0688976	0.12041	-0.0727483	SSD	Group2	Seedling
LOC_Os02g57180	NA	NADH dehydrogenase 1 alpha subcomplex subunit 9,mitochondrial precursor, putative, expressed	2	35013566	35017652	S2_35016394	T/G	2	35016394	9.43016e-05	0.287671	292	0.0688976	0.119616	-0.0784201	SSD	Group2	Seedling
LOC_Os02g57180	NA	NADH dehydrogenase 1 alpha subcomplex subunit 9,mitochondrial precursor, putative, expressed	2	35013566	35017652	S2_35016400	G/A	2	35016400	9.80421e-05	0.308219	292	0.0688976	0.119365	-0.142041	SSD	Group2	Seedling
LOC_Os02g57180	NA	NADH dehydrogenase 1 alpha subcomplex subunit 9,mitochondrial precursor, putative, expressed	2	35013566	35017652	S2_35016798	T/C	2	35016798	3.96617e-05	0.332192	292	0.0688976	0.125234	0.150286	SSD	Group2	Seedling
LOC_Os02g57210	NA	expressed protein	2	35052914	35054343	S2_35053375	A/G	2	35053375	4.2402e-05	0.340753	292	0.0688976	0.124798	-0.0823561	SSD	Group2	Seedling
LOC_Os02g57220	NA	WD domain, G-beta repeat domain containing protein, expressed	2	35056930	35062529	S2_35056988	T/C	2	35056988	1.87606e-05	0.433219	292	0.0688976	0.130136	0.1435	SSD	Group2	Seedling
LOC_Os02g57240	KOB1	oxidoreductase, aldo/keto reductase family protein, putative, expressed	2	35067976	35072613	S2_35071064	A/G	2	35071064	2.90699e-05	0.443493	292	0.0688976	0.127263	-0.214048	SSD	Group2	Seedling
LOC_Os02g57260	Osl57	3-ketoacyl-CoA thiolase, peroxisomal precursor, putative, expressed	2	35080879	35085201	S2_35082792	G/A	2	35082792	7.43263e-05	0.332192	292	0.0688976	0.121154	-0.107952	SSD	Group2	Seedling
LOC_Os02g57270	RTBP1	MYB family transcription factor, putative, expressed	2	35086087	35090659	S2_35087246	T/C	2	35087246	3.07766e-05	0.366438	292	0.0688976	0.12689	0.0888383	SSD	Group2	Seedling
LOC_Os02g57270	RTBP1	MYB family transcription factor, putative, expressed	2	35086087	35090659	S2_35088480	A/G	2	35088480	2.06535e-05	0.366438	292	0.0688976	0.129504	0.0295761	SSD	Group2	Seedling
LOC_Os02g57270	RTBP1	MYB family transcription factor, putative, expressed	2	35086087	35090659	S2_35089746	A/G	2	35089746	8.90765e-05	0.357877	292	0.0688976	0.119984	-0.139004	SSD	Group2	Seedling
LOC_Os02g57290	CYP97A4	cytochrome P450, putative, expressed	2	35091194	35099291	S2_35091909	A/T	2	35091909	5.6881e-05	0.393836	292	0.0688976	0.122888	0.0379408	SSD	Group2	Seedling
LOC_Os03g13350	NA	retrotransposon protein, putative, unclassified, expressed	3	7202338	7206835	S3_7204553	C/T	3	7204553	2.55127e-05	0.143836	292	0.0688976	0.128118	0.234929	SSD	Group2	Seedling
LOC_Os03g14760	NA	retrotransposon protein, putative, unclassified, expressed	3	8024487	8027420	S3_8026253	C/A	3	8026253	7.98922e-05	0.0513699	292	0.0688976	0.120687	0.148395	SSD	Group2	Seedling
LOC_Os03g56020	NA	RNA recognition motif containing protein, putative, expressed	3	31888363	31896406	S3_31891444	A/C	3	31891444	3.30066e-05	0.0675676	259	0.0749619	0.13979	-0.239758	SE	Group1	Seedling
LOC_Os03g56942	NA	hypothetical protein	3	32427006	32427425	S3_32427329	C/T	3	32427329	7.41595e-05	0.0579151	259	0.0749619	0.133837	-0.462667	SE	Group1	Seedling
LOC_Os03g56942	NA	hypothetical protein	3	32427006	32427425	S3_32427343	A/C	3	32427343	8.19697e-06	0.0521236	259	0.0749619	0.150173	-0.0681214	SE	Group1	Seedling
LOC_Os03g56942	NA	hypothetical protein	3	32427006	32427425	S3_32427344	T/C	3	32427344	2.77079e-05	0.0559846	259	0.0749619	0.141085	0.185731	SE	Group1	Seedling
LOC_Os04g05104	NA	retrotransposon protein, putative, unclassified, expressed	4	2523883	2535289	S4_2524258	T/C	4	2524258	5.58644e-05	0.0684932	292	0.0688976	0.123005	-0.336063	SSD	Group2	Seedling
LOC_Os04g06330	NA	retrotransposon, putative, centromere-specific	4	3309185	3309664	S4_3309439	T/C	4	3309439	2.59231e-05	0.236301	292	0.0688976	0.128013	0.410465	SSD	Group2	Seedling
LOC_Os04g06330	NA	retrotransposon, putative, centromere-specific	4	3309185	3309664	S4_3309446	T/C	4	3309446	8.35489e-06	0.241438	292	0.0688976	0.13548	NA	SSD	Group2	Seedling
LOC_Os04g06980	NA	retrotransposon protein, putative, Ty3-gypsy subclass	4	3678686	3681162	S4_3680199	A/G	4	3680199	1.34576e-05	0.111301	292	0.0688976	0.132325	0.165932	SSD	Group2	Seedling
LOC_Os04g10460	NA	amidase, putative, expressed	4	5686452	5689491	S4_5689300	C/G	4	5689300	8.96992e-05	0.0673759	141	0.0830241	0.192148	0.594791	SSD	Group1	Seedling
LOC_Os04g19360	NA	retrotransposon protein, putative, Ty3-gypsy subclass, expressed	4	10770530	10777285	S4_10776301	T/C	4	10776301	9.34621e-05	0.155822	292	0.0688976	0.119674	-0.22818	SSD	Group2	Seedling
LOC_Os04g32860	NA	expressed protein	4	19841565	19844276	S4_19843101	A/G	4	19843101	1.82593e-07	0.0888031	259	0.0749619	0.179361	0.0174513	SE	Group1	Seedling
LOC_Os04g49970	NA	U-box, putative, expressed	4	29809222	29810808	S4_29809856	A/G	4	29809856	6.90043e-05	0.173759	141	0.0830241	0.195885	0.751499	SSD	Group1	Seedling
LOC_Os04g49990	NA	AT hook motif domain containing protein, expressed	4	29814033	29818148	S4_29816308	C/T	4	29816308	7.15566e-05	0.170213	141	0.0830241	0.195367	-0.194058	SSD	Group1	Seedling
LOC_Os04g50000	NA	retrotransposon protein, putative, unclassified, expressed	4	29818728	29823082	S4_29818740	G/A	4	29818740	2.47481e-05	0.170213	141	0.0830241	0.210683	-0.421346	SSD	Group1	Seedling
LOC_Os04g50000	NA	retrotransposon protein, putative, unclassified, expressed	4	29818728	29823082	S4_29818880	C/A	4	29818880	3.38543e-05	0.173759	141	0.0830241	0.206131	-0.547149	SSD	Group1	Seedling
LOC_Os04g50000	NA	retrotransposon protein, putative, unclassified, expressed	4	29818728	29823082	S4_29819029	C/T	4	29819029	5.70693e-05	0.177305	141	0.0830241	0.198604	0.955303	SSD	Group1	Seedling
LOC_Os04g50000	NA	retrotransposon protein, putative, unclassified, expressed	4	29818728	29823082	S4_29821046	C/T	4	29821046	7.15566e-05	0.170213	141	0.0830241	0.195367	0.63519	SSD	Group1	Seedling
LOC_Os04g50000	NA	retrotransposon protein, putative, unclassified, expressed	4	29818728	29823082	S4_29821754	C/T	4	29821754	7.15566e-05	0.170213	141	0.0830241	0.195367	-0.298063	SSD	Group1	Seedling
LOC_Os04g50000	NA	retrotransposon protein, putative, unclassified, expressed	4	29818728	29823082	S4_29822169	G/A	4	29822169	5.92645e-05	0.173759	141	0.0830241	0.198063	0.782951	SSD	Group1	Seedling
LOC_Os04g50000	NA	retrotransposon protein, putative, unclassified, expressed	4	29818728	29823082	S4_29822429	G/A	4	29822429	6.52331e-05	0.177305	141	0.0830241	0.196689	-0.424311	SSD	Group1	Seedling
LOC_Os04g50000	NA	retrotransposon protein, putative, unclassified, expressed	4	29818728	29823082	S4_29822489	G/A	4	29822489	4.56824e-05	0.173759	141	0.0830241	0.201802	-0.508867	SSD	Group1	Seedling
LOC_Os04g50000	NA	retrotransposon protein, putative, unclassified, expressed	4	29818728	29823082	S4_29822907	C/T	4	29822907	4.05723e-05	0.166667	141	0.0830241	0.203513	0.427448	SSD	Group1	Seedling
LOC_Os04g50010	NA	hypothetical protein	4	29823542	29823757	S4_29823544	G/A	4	29823544	8.1394e-05	0.170213	141	0.0830241	0.19353	-0.608195	SSD	Group1	Seedling
LOC_Os04g50010	NA	hypothetical protein	4	29823542	29823757	S4_29823587	C/T	4	29823587	8.86733e-05	0.173759	141	0.0830241	0.192311	-0.405227	SSD	Group1	Seedling
LOC_Os04g54670	NA	retrotransposon protein, putative, unclassified, expressed	4	32523177	32530936	S4_32524861	G/T	4	32524861	1.19427e-05	0.115385	416	0.0825746	0.126333	-0.172796	SE	Group2	Seedling
LOC_Os05g05280	PTB1	zinc finger family protein, putative, expressed	5	2598338	2604167	S5_2599341	C/T	5	2599341	9.41186e-06	0.0804795	292	0.0688976	0.13469	1.8524	SSD	Group2	Seedling
LOC_Os05g06140	NA	lipase, putative, expressed	5	3069643	3074392	S5_3072512	T/C	5	3072512	1.43038e-05	0.0579151	259	0.0749619	0.146002	NA	SE	Group1	Seedling
LOC_Os05g07720	OsTAR1	alliin lyase precursor, putative, expressed	5	4152905	4155895	S5_4154892	T/C	5	4154892	5.29836e-05	0.0567376	141	0.0830241	0.19967	1.22554	SSD	Group1	Seedling
LOC_Os05g07720	OsTAR1	alliin lyase precursor, putative, expressed	5	4152905	4155895	S5_4155140	C/A	5	4155140	6.52343e-05	0.0521236	259	0.0749619	0.134776	-0.196827	SE	Group1	Seedling
LOC_Os05g07720	OsTAR1	alliin lyase precursor, putative, expressed	5	4152905	4155895	S5_4155140	C/A	5	4155140	6.64803e-05	0.070922	141	0.0830241	0.196418	0.561036	SSD	Group1	Seedling
LOC_Os05g07740	NA	receptor-like protein kinase 2 precursor, putative, expressed	5	4172714	4176808	S5_4174959	G/A	5	4174959	7.75397e-05	0.0540541	259	0.0749619	0.133511	-0.671829	SE	Group1	Seedling
LOC_Os05g07764	NA	carboxyl-terminal proteinase, putative, expressed	5	4179894	4185986	S5_4182861	T/A	5	4182861	3.42436e-06	0.0501931	259	0.0749619	0.156766	-0.510694	SE	Group1	Seedling
LOC_Os05g07790	BC10|FC116	DNA binding protein, putative, expressed	5	4195278	4200491	S5_4197687	C/T	5	4197687	8.54926e-05	0.0567376	141	0.0830241	0.192831	-1.35683	SSD	Group1	Seedling
LOC_Os05g31630	NA	transposon protein, putative, unclassified, expressed	5	18417897	18423241	S5_18418941	T/C	5	18418941	8.90224e-05	0.497596	416	0.0825746	0.117459	0.0752865	SE	Group2	Seedling
LOC_Os05g31690	NA	expressed protein	5	18448000	18452206	S5_18449354	C/T	5	18449354	1.23119e-06	0.454327	416	0.0825746	0.136561	-0.0342342	SE	Group2	Seedling
LOC_Os05g31690	NA	expressed protein	5	18448000	18452206	S5_18449354	C/T	5	18449354	6.51949e-06	0.494863	292	0.0688976	0.137128	0.000420094	SSD	Group2	Seedling
LOC_Os05g31690	NA	expressed protein	5	18448000	18452206	S5_18450115	T/C	5	18450115	3.53462e-05	0.472603	292	0.0688976	0.125985	-0.177724	SSD	Group2	Seedling
LOC_Os05g31690	NA	expressed protein	5	18448000	18452206	S5_18450115	T/C	5	18450115	4.04119e-05	0.426683	416	0.0825746	0.120927	0.146053	SE	Group2	Seedling
LOC_Os05g31690	NA	expressed protein	5	18448000	18452206	S5_18450132	T/C	5	18450132	1.69942e-05	0.47089	292	0.0688976	0.130787	-0.162624	SSD	Group2	Seedling
LOC_Os05g31690	NA	expressed protein	5	18448000	18452206	S5_18450132	T/C	5	18450132	3.21462e-05	0.425481	416	0.0825746	0.121937	0.149759	SE	Group2	Seedling
LOC_Os05g31690	NA	expressed protein	5	18448000	18452206	S5_18450602	G/A	5	18450602	1.12497e-06	0.459135	416	0.0825746	0.136971	0.205753	SE	Group2	Seedling
LOC_Os05g31690	NA	expressed protein	5	18448000	18452206	S5_18450602	G/A	5	18450602	4.44634e-06	0.486301	292	0.0688976	0.139679	-0.216553	SSD	Group2	Seedling
LOC_Os05g31690	NA	expressed protein	5	18448000	18452206	S5_18450673	G/A	5	18450673	3.5677e-05	0.429087	416	0.0825746	0.121477	-0.0753864	SE	Group2	Seedling
LOC_Os05g31690	NA	expressed protein	5	18448000	18452206	S5_18450673	G/A	5	18450673	4.4638e-05	0.472603	292	0.0688976	0.124463	-0.000152953	SSD	Group2	Seedling
LOC_Os05g31690	NA	expressed protein	5	18448000	18452206	S5_18451380	A/G	5	18451380	1.63726e-05	0.491438	292	0.0688976	0.131032	-0.0334427	SSD	Group2	Seedling
LOC_Os05g31690	NA	expressed protein	5	18448000	18452206	S5_18451380	A/G	5	18451380	1.51352e-06	0.453125	416	0.0825746	0.135624	-0.0467517	SE	Group2	Seedling
LOC_Os05g31690	NA	expressed protein	5	18448000	18452206	S5_18451664	A/G	5	18451664	8.97752e-06	0.489726	292	0.0688976	0.135003	0.0252767	SSD	Group2	Seedling
LOC_Os05g31690	NA	expressed protein	5	18448000	18452206	S5_18451664	A/G	5	18451664	9.18036e-07	0.454327	416	0.0825746	0.137896	0.0850259	SE	Group2	Seedling
LOC_Os05g31690	NA	expressed protein	5	18448000	18452206	S5_18451684	G/T	5	18451684	1.65473e-05	0.493151	292	0.0688976	0.130962	-0.0260296	SSD	Group2	Seedling
LOC_Os05g31690	NA	expressed protein	5	18448000	18452206	S5_18451684	G/T	5	18451684	1.41067e-06	0.453125	416	0.0825746	0.135943	-0.0818989	SE	Group2	Seedling
LOC_Os05g31700	NA	transposon protein, putative, CACTA, En/Spm sub-class, expressed	5	18456922	18457134	S5_18457063	C/T	5	18457063	2.28702e-06	0.451923	416	0.0825746	0.133755	-0.089574	SE	Group2	Seedling
LOC_Os05g31700	NA	transposon protein, putative, CACTA, En/Spm sub-class, expressed	5	18456922	18457134	S5_18457063	C/T	5	18457063	4.01263e-05	0.498288	292	0.0688976	0.125158	-0.102486	SSD	Group2	Seedling
LOC_Os05g31710	NA	expressed protein	5	18463381	18464778	S5_18463594	G/A	5	18463594	9.66932e-06	0.498288	292	0.0688976	0.134511	-0.0597034	SSD	Group2	Seedling
LOC_Os05g31710	NA	expressed protein	5	18463381	18464778	S5_18463594	G/A	5	18463594	6.03478e-07	0.449519	416	0.0825746	0.139809	0.150856	SE	Group2	Seedling
LOC_Os05g31710	NA	expressed protein	5	18463381	18464778	S5_18463754	T/A	5	18463754	1.00747e-05	0.496575	292	0.0688976	0.134239	0.104167	SSD	Group2	Seedling
LOC_Os05g31710	NA	expressed protein	5	18463381	18464778	S5_18463754	T/A	5	18463754	6.32345e-07	0.448317	416	0.0825746	0.139596	0.0104942	SE	Group2	Seedling
LOC_Os05g31710	NA	expressed protein	5	18463381	18464778	S5_18464182	C/A	5	18464182	1.22595e-05	0.494863	292	0.0688976	0.132941	NA	SSD	Group2	Seedling
LOC_Os05g31710	NA	expressed protein	5	18463381	18464778	S5_18464182	C/A	5	18464182	4.94794e-07	0.449519	416	0.0825746	0.140716	NA	SE	Group2	Seedling
LOC_Os05g31710	NA	expressed protein	5	18463381	18464778	S5_18464212	G/T	5	18464212	1.64916e-06	0.449519	416	0.0825746	0.135235	-0.0572003	SE	Group2	Seedling
LOC_Os05g31710	NA	expressed protein	5	18463381	18464778	S5_18464212	G/T	5	18464212	3.42103e-05	0.496575	292	0.0688976	0.126199	-0.0908078	SSD	Group2	Seedling
LOC_Os05g31710	NA	expressed protein	5	18463381	18464778	S5_18464218	G/A	5	18464218	1.08538e-06	0.450721	416	0.0825746	0.137134	0.0510433	SE	Group2	Seedling
LOC_Os05g31710	NA	expressed protein	5	18463381	18464778	S5_18464218	G/A	5	18464218	3.07359e-05	0.494863	292	0.0688976	0.126898	-0.304082	SSD	Group2	Seedling
LOC_Os05g31720	NA	stromal membrane-associated protein, putative, expressed	5	18466963	18470649	S5_18467495	G/T	5	18467495	1.12431e-05	0.496575	292	0.0688976	0.133513	0.0876547	SSD	Group2	Seedling
LOC_Os05g31720	NA	stromal membrane-associated protein, putative, expressed	5	18466963	18470649	S5_18467495	G/T	5	18467495	8.07399e-07	0.450721	416	0.0825746	0.138481	-0.131249	SE	Group2	Seedling
LOC_Os05g31720	NA	stromal membrane-associated protein, putative, expressed	5	18466963	18470649	S5_18467664	G/A	5	18467664	6.31054e-06	0.447115	416	0.0825746	0.129185	-0.104087	SE	Group2	Seedling
LOC_Os05g31720	NA	stromal membrane-associated protein, putative, expressed	5	18466963	18470649	S5_18467664	G/A	5	18467664	5.13269e-05	0.496575	292	0.0688976	0.123555	0.0816231	SSD	Group2	Seedling
LOC_Os05g31720	NA	stromal membrane-associated protein, putative, expressed	5	18466963	18470649	S5_18467764	G/A	5	18467764	2.21548e-05	0.498288	292	0.0688976	0.129044	0.141404	SSD	Group2	Seedling
LOC_Os05g31720	NA	stromal membrane-associated protein, putative, expressed	5	18466963	18470649	S5_18467764	G/A	5	18467764	6.56275e-07	0.450721	416	0.0825746	0.139426	-0.146734	SE	Group2	Seedling
LOC_Os05g31720	NA	stromal membrane-associated protein, putative, expressed	5	18466963	18470649	S5_18468197	G/A	5	18468197	1.53511e-05	0.482877	292	0.0688976	0.131457	-0.411797	SSD	Group2	Seedling
LOC_Os05g31720	NA	stromal membrane-associated protein, putative, expressed	5	18466963	18470649	S5_18468197	G/A	5	18468197	1.66158e-06	0.436298	416	0.0825746	0.135201	0.316392	SE	Group2	Seedling
LOC_Os05g31720	NA	stromal membrane-associated protein, putative, expressed	5	18466963	18470649	S5_18468428	A/G	5	18468428	8.64628e-07	0.423077	416	0.0825746	0.138169	0.101862	SE	Group2	Seedling
LOC_Os05g31730	NA	transporter, monovalent cation:proton antiporter-2 family, putative, expressed	5	18475523	18479480	S5_18475547	T/A	5	18475547	8.03735e-07	0.441106	416	0.0825746	0.138502	-0.107945	SE	Group2	Seedling
LOC_Os05g31730	NA	transporter, monovalent cation:proton antiporter-2 family, putative, expressed	5	18475523	18479480	S5_18475562	G/A	5	18475562	1.25297e-06	0.44351	416	0.0825746	0.136482	-0.103012	SE	Group2	Seedling
LOC_Os05g31730	NA	transporter, monovalent cation:proton antiporter-2 family, putative, expressed	5	18475523	18479480	S5_18475562	G/A	5	18475562	9.09745e-05	0.494863	292	0.0688976	0.119848	0.0165223	SSD	Group2	Seedling
LOC_Os05g31730	NA	transporter, monovalent cation:proton antiporter-2 family, putative, expressed	5	18475523	18479480	S5_18477469	G/A	5	18477469	3.83238e-05	0.445913	416	0.0825746	0.121161	-0.0997479	SE	Group2	Seedling
LOC_Os05g31730	NA	transporter, monovalent cation:proton antiporter-2 family, putative, expressed	5	18475523	18479480	S5_18478045	C/G	5	18478045	2.45242e-05	0.496575	292	0.0688976	0.128377	-0.0335041	SSD	Group2	Seedling
LOC_Os05g31730	NA	transporter, monovalent cation:proton antiporter-2 family, putative, expressed	5	18475523	18479480	S5_18478045	C/G	5	18478045	1.08694e-06	0.450721	416	0.0825746	0.137128	-0.127575	SE	Group2	Seedling
LOC_Os05g31730	NA	transporter, monovalent cation:proton antiporter-2 family, putative, expressed	5	18475523	18479480	S5_18478079	G/A	5	18478079	2.11641e-07	0.453125	416	0.0825746	0.144612	-0.153889	SE	Group2	Seedling
LOC_Os05g31730	NA	transporter, monovalent cation:proton antiporter-2 family, putative, expressed	5	18475523	18479480	S5_18478079	G/A	5	18478079	2.00987e-05	0.491438	292	0.0688976	0.129683	0.0644135	SSD	Group2	Seedling
LOC_Os05g31730	NA	transporter, monovalent cation:proton antiporter-2 family, putative, expressed	5	18475523	18479480	S5_18478137	G/A	5	18478137	3.81678e-06	0.447115	416	0.0825746	0.131444	0.261136	SE	Group2	Seedling
LOC_Os05g31730	NA	transporter, monovalent cation:proton antiporter-2 family, putative, expressed	5	18475523	18479480	S5_18478137	G/A	5	18478137	6.84498e-05	0.498288	292	0.0688976	0.121687	-0.0905592	SSD	Group2	Seedling
LOC_Os05g31730	NA	transporter, monovalent cation:proton antiporter-2 family, putative, expressed	5	18475523	18479480	S5_18479098	A/T	5	18479098	6.79282e-05	0.457192	292	0.0688976	0.121737	-0.012453	SSD	Group2	Seedling
LOC_Os05g31730	NA	transporter, monovalent cation:proton antiporter-2 family, putative, expressed	5	18475523	18479480	S5_18479187	A/G	5	18479187	5.97805e-06	0.451923	416	0.0825746	0.129428	-0.0476589	SE	Group2	Seedling
LOC_Os05g31730	NA	transporter, monovalent cation:proton antiporter-2 family, putative, expressed	5	18475523	18479480	S5_18479187	A/G	5	18479187	4.49905e-05	0.493151	292	0.0688976	0.124412	-0.0941607	SSD	Group2	Seedling
LOC_Os05g31740	NA	cytochrome P450 86A2, putative, expressed	5	18487281	18489223	S5_18487429	A/G	5	18487429	1.46756e-05	0.498798	416	0.0825746	0.125415	-0.184148	SE	Group2	Seedling
LOC_Os05g31740	NA	cytochrome P450 86A2, putative, expressed	5	18487281	18489223	S5_18489014	T/A	5	18489014	1.49538e-06	0.487981	416	0.0825746	0.135679	0.223873	SE	Group2	Seedling
LOC_Os05g31744	NA	expressed protein	5	18489775	18490672	S5_18490236	T/G	5	18490236	1.6954e-05	0.418269	416	0.0825746	0.124773	0.1353	SE	Group2	Seedling
LOC_Os05g31744	NA	expressed protein	5	18489775	18490672	S5_18490394	A/G	5	18490394	1.6581e-05	0.489183	416	0.0825746	0.124872	0.147415	SE	Group2	Seedling
LOC_Os05g31744	NA	expressed protein	5	18489775	18490672	S5_18490509	T/C	5	18490509	2.04699e-06	0.484375	416	0.0825746	0.134256	-0.0402535	SE	Group2	Seedling
LOC_Os05g31744	NA	expressed protein	5	18489775	18490672	S5_18490665	A/G	5	18490665	8.65737e-05	0.491587	416	0.0825746	0.117581	-0.0524437	SE	Group2	Seedling
LOC_Os05g31760	NA	annexin, putative, expressed	5	18500678	18503121	S5_18502427	A/C	5	18502427	3.10135e-05	0.369863	292	0.0688976	0.12684	-0.162255	SSD	Group2	Seedling
LOC_Os05g31760	NA	annexin, putative, expressed	5	18500678	18503121	S5_18502427	A/C	5	18502427	1.24618e-06	0.405048	416	0.0825746	0.136506	0.180278	SE	Group2	Seedling
LOC_Os05g31760	NA	annexin, putative, expressed	5	18500678	18503121	S5_18502432	T/C	5	18502432	2.01386e-06	0.40625	416	0.0825746	0.13433	0.0500118	SE	Group2	Seedling
LOC_Os05g31760	NA	annexin, putative, expressed	5	18500678	18503121	S5_18502432	T/C	5	18502432	4.73629e-05	0.371575	292	0.0688976	0.124078	0.0113893	SSD	Group2	Seedling
LOC_Os05g31785	NA	expressed protein	5	18516997	18517584	S5_18517182	T/C	5	18517182	1.41782e-07	0.395433	416	0.0825746	0.146458	-0.0381883	SE	Group2	Seedling
LOC_Os05g31810	NA	retrotransposon protein, putative, unclassified	5	18527650	18527961	S5_18527694	A/G	5	18527694	3.66573e-05	0.398973	292	0.0688976	0.125747	0.0731234	SSD	Group2	Seedling
LOC_Os05g31810	NA	retrotransposon protein, putative, unclassified	5	18527650	18527961	S5_18527694	A/G	5	18527694	8.76705e-06	0.43149	416	0.0825746	0.127713	-0.130814	SE	Group2	Seedling
LOC_Os05g31810	NA	retrotransposon protein, putative, unclassified	5	18527650	18527961	S5_18527766	T/C	5	18527766	1.52908e-05	0.435096	416	0.0825746	0.125232	NA	SE	Group2	Seedling
LOC_Os05g31810	NA	retrotransposon protein, putative, unclassified	5	18527650	18527961	S5_18527766	T/C	5	18527766	6.74147e-05	0.40411	292	0.0688976	0.121786	NA	SSD	Group2	Seedling
LOC_Os05g31810	NA	retrotransposon protein, putative, unclassified	5	18527650	18527961	S5_18527774	A/G	5	18527774	5.32046e-05	0.205529	416	0.0825746	0.119716	0.0367863	SE	Group2	Seedling
LOC_Os05g31810	NA	retrotransposon protein, putative, unclassified	5	18527650	18527961	S5_18527920	T/C	5	18527920	2.1211e-05	0.393836	292	0.0688976	0.129329	-0.011118	SSD	Group2	Seedling
LOC_Os05g31810	NA	retrotransposon protein, putative, unclassified	5	18527650	18527961	S5_18527920	T/C	5	18527920	8.37361e-07	0.423077	416	0.0825746	0.138315	-0.0536377	SE	Group2	Seedling
LOC_Os05g31820	NA	expressed protein	5	18534123	18534677	S5_18534654	A/G	5	18534654	3.79329e-05	0.215144	416	0.0825746	0.121206	0.0261837	SE	Group2	Seedling
LOC_Os05g31830	NA	aspartyl protease family protein, putative, expressed	5	18535358	18536883	S5_18536210	A/G	5	18536210	4.26699e-05	0.412671	292	0.0688976	0.124757	-0.0674505	SSD	Group2	Seedling
LOC_Os05g31830	NA	aspartyl protease family protein, putative, expressed	5	18535358	18536883	S5_18536210	A/G	5	18536210	2.11082e-05	0.441106	416	0.0825746	0.123799	0.122216	SE	Group2	Seedling
LOC_Os05g31850	NA	retrotransposon protein, putative, unclassified, expressed	5	18542137	18545194	S5_18542612	T/C	5	18542612	1.36381e-05	0.365385	416	0.0825746	0.125741	-0.117107	SE	Group2	Seedling
LOC_Os05g31850	NA	retrotransposon protein, putative, unclassified, expressed	5	18542137	18545194	S5_18542754	T/C	5	18542754	1.15857e-05	0.4375	416	0.0825746	0.126468	0.168149	SE	Group2	Seedling
LOC_Os05g31850	NA	retrotransposon protein, putative, unclassified, expressed	5	18542137	18545194	S5_18542754	T/C	5	18542754	5.91928e-05	0.400685	292	0.0688976	0.122629	-0.0878639	SSD	Group2	Seedling
LOC_Os05g31850	NA	retrotransposon protein, putative, unclassified, expressed	5	18542137	18545194	S5_18543635	A/C	5	18543635	9.07197e-05	0.40411	292	0.0688976	0.119866	0.0285048	SSD	Group2	Seedling
LOC_Os05g31850	NA	retrotransposon protein, putative, unclassified, expressed	5	18542137	18545194	S5_18543635	A/C	5	18543635	1.28913e-05	0.433894	416	0.0825746	0.125992	-0.114771	SE	Group2	Seedling
LOC_Os05g31850	NA	retrotransposon protein, putative, unclassified, expressed	5	18542137	18545194	S5_18544323	A/G	5	18544323	1.89467e-06	0.4375	416	0.0825746	0.134606	-0.0917786	SE	Group2	Seedling
LOC_Os05g31850	NA	retrotransposon protein, putative, unclassified, expressed	5	18542137	18545194	S5_18544323	A/G	5	18544323	8.56495e-05	0.405822	292	0.0688976	0.120237	0.185104	SSD	Group2	Seedling
LOC_Os05g31850	NA	retrotransposon protein, putative, unclassified, expressed	5	18542137	18545194	S5_18544652	G/A	5	18544652	2.6647e-05	0.407534	292	0.0688976	0.127833	0.0621309	SSD	Group2	Seedling
LOC_Os05g31850	NA	retrotransposon protein, putative, unclassified, expressed	5	18542137	18545194	S5_18544652	G/A	5	18544652	1.27934e-06	0.444712	416	0.0825746	0.136387	-0.129052	SE	Group2	Seedling
LOC_Os05g31850	NA	retrotransposon protein, putative, unclassified, expressed	5	18542137	18545194	S5_18545162	T/C	5	18545162	4.6855e-05	0.433894	416	0.0825746	0.120276	0.0295955	SE	Group2	Seedling
LOC_Os05g31860	NA	retrotransposon protein, putative, unclassified, expressed	5	18546049	18551258	S5_18549357	A/G	5	18549357	3.48592e-05	0.324519	416	0.0825746	0.121579	-0.156315	SE	Group2	Seedling
LOC_Os05g31860	NA	retrotransposon protein, putative, unclassified, expressed	5	18546049	18551258	S5_18550517	A/G	5	18550517	3.11306e-05	0.402397	292	0.0688976	0.126815	0.0241077	SSD	Group2	Seedling
LOC_Os05g31860	NA	retrotransposon protein, putative, unclassified, expressed	5	18546049	18551258	S5_18550517	A/G	5	18550517	3.539e-06	0.436298	416	0.0825746	0.131785	-0.0732075	SE	Group2	Seedling
LOC_Os05g31860	NA	retrotransposon protein, putative, unclassified, expressed	5	18546049	18551258	S5_18551101	C/G	5	18551101	3.9487e-05	0.424279	416	0.0825746	0.121029	0.0772229	SE	Group2	Seedling
LOC_Os05g31890	NA	aspartyl protease family protein, putative, expressed	5	18564025	18565651	S5_18564056	T/A	5	18564056	1.57523e-05	0.412671	292	0.0688976	0.131287	-0.00854777	SSD	Group2	Seedling
LOC_Os05g31890	NA	aspartyl protease family protein, putative, expressed	5	18564025	18565651	S5_18564056	T/A	5	18564056	8.99147e-06	0.441106	416	0.0825746	0.1276	0.00441971	SE	Group2	Seedling
LOC_Os05g31890	NA	aspartyl protease family protein, putative, expressed	5	18564025	18565651	S5_18564584	A/G	5	18564584	6.99889e-07	0.47476	416	0.0825746	0.139132	-0.0539951	SE	Group2	Seedling
LOC_Os05g31890	NA	aspartyl protease family protein, putative, expressed	5	18564025	18565651	S5_18564651	G/C	5	18564651	8.51376e-05	0.407534	292	0.0688976	0.120276	-0.0342432	SSD	Group2	Seedling
LOC_Os05g31890	NA	aspartyl protease family protein, putative, expressed	5	18564025	18565651	S5_18564651	G/C	5	18564651	3.82437e-05	0.436298	416	0.0825746	0.12117	0.044368	SE	Group2	Seedling
LOC_Os05g31890	NA	aspartyl protease family protein, putative, expressed	5	18564025	18565651	S5_18564684	G/A	5	18564684	5.08825e-05	0.409247	292	0.0688976	0.123612	0.0718115	SSD	Group2	Seedling
LOC_Os05g31890	NA	aspartyl protease family protein, putative, expressed	5	18564025	18565651	S5_18564684	G/A	5	18564684	3.99653e-06	0.439904	416	0.0825746	0.131237	-0.211504	SE	Group2	Seedling
LOC_Os05g31890	NA	aspartyl protease family protein, putative, expressed	5	18564025	18565651	S5_18564840	C/A	5	18564840	4.03716e-06	0.419471	416	0.0825746	0.131192	0.0477619	SE	Group2	Seedling
LOC_Os05g31890	NA	aspartyl protease family protein, putative, expressed	5	18564025	18565651	S5_18565184	A/G	5	18565184	6.24795e-05	0.409247	292	0.0688976	0.122278	-0.0936354	SSD	Group2	Seedling
LOC_Os05g31890	NA	aspartyl protease family protein, putative, expressed	5	18564025	18565651	S5_18565184	A/G	5	18565184	1.44894e-05	0.441106	416	0.0825746	0.125471	0.0732602	SE	Group2	Seedling
LOC_Os05g31890	NA	aspartyl protease family protein, putative, expressed	5	18564025	18565651	S5_18565272	G/A	5	18565272	3.27262e-05	0.439904	416	0.0825746	0.121858	0.0179031	SE	Group2	Seedling
LOC_Os05g31890	NA	aspartyl protease family protein, putative, expressed	5	18564025	18565651	S5_18565458	A/C	5	18565458	1.21291e-06	0.472356	416	0.0825746	0.136629	0.0380033	SE	Group2	Seedling
LOC_Os05g31890	NA	aspartyl protease family protein, putative, expressed	5	18564025	18565651	S5_18565612	G/C	5	18565612	3.82097e-05	0.434932	292	0.0688976	0.125477	0.27841	SSD	Group2	Seedling
LOC_Os05g31890	NA	aspartyl protease family protein, putative, expressed	5	18564025	18565651	S5_18565612	G/C	5	18565612	7.99178e-07	0.472356	416	0.0825746	0.138528	-0.265189	SE	Group2	Seedling
LOC_Os05g31900	NA	expressed protein	5	18569089	18569958	S5_18569097	T/C	5	18569097	9.08803e-06	0.412671	292	0.0688976	0.134922	-0.36424	SSD	Group2	Seedling
LOC_Os05g31900	NA	expressed protein	5	18569089	18569958	S5_18569097	T/C	5	18569097	1.46021e-06	0.441106	416	0.0825746	0.135787	0.0781645	SE	Group2	Seedling
LOC_Os05g31900	NA	expressed protein	5	18569089	18569958	S5_18569143	G/T	5	18569143	1.082e-05	0.432692	416	0.0825746	0.126773	-0.113075	SE	Group2	Seedling
LOC_Os05g31900	NA	expressed protein	5	18569089	18569958	S5_18569175	C/T	5	18569175	3.40194e-06	0.472356	416	0.0825746	0.131963	-0.0526985	SE	Group2	Seedling
LOC_Os05g31900	NA	expressed protein	5	18569089	18569958	S5_18569182	C/T	5	18569182	1.29254e-05	0.435096	416	0.0825746	0.12598	-0.0645967	SE	Group2	Seedling
LOC_Os05g31900	NA	expressed protein	5	18569089	18569958	S5_18569338	T/C	5	18569338	3.11595e-06	0.479567	416	0.0825746	0.132358	-0.307709	SE	Group2	Seedling
LOC_Os05g31900	NA	expressed protein	5	18569089	18569958	S5_18569377	T/C	5	18569377	8.73359e-05	0.44863	292	0.0688976	0.120111	0.322761	SSD	Group2	Seedling
LOC_Os05g31900	NA	expressed protein	5	18569089	18569958	S5_18569377	T/C	5	18569377	3.84809e-06	0.484375	416	0.0825746	0.131407	-0.36238	SE	Group2	Seedling
LOC_Os05g31900	NA	expressed protein	5	18569089	18569958	S5_18569532	A/G	5	18569532	2.02911e-06	0.477163	416	0.0825746	0.134296	-0.0529683	SE	Group2	Seedling
LOC_Os05g31900	NA	expressed protein	5	18569089	18569958	S5_18569533	T/C	5	18569533	1.58282e-06	0.47476	416	0.0825746	0.135421	-0.291639	SE	Group2	Seedling
LOC_Os05g31900	NA	expressed protein	5	18569089	18569958	S5_18569579	A/G	5	18569579	4.08246e-06	0.471154	416	0.0825746	0.131141	-0.374424	SE	Group2	Seedling
LOC_Os05g31900	NA	expressed protein	5	18569089	18569958	S5_18569616	A/G	5	18569616	4.47447e-07	0.471154	416	0.0825746	0.141177	0.179424	SE	Group2	Seedling
LOC_Os05g31900	NA	expressed protein	5	18569089	18569958	S5_18569616	A/G	5	18569616	3.39428e-05	0.429795	292	0.0688976	0.12625	-0.110487	SSD	Group2	Seedling
LOC_Os05g31900	NA	expressed protein	5	18569089	18569958	S5_18569884	T/C	5	18569884	5.10549e-05	0.407534	292	0.0688976	0.12359	0.118347	SSD	Group2	Seedling
LOC_Os05g31900	NA	expressed protein	5	18569089	18569958	S5_18569884	T/C	5	18569884	4.35524e-06	0.438702	416	0.0825746	0.13085	0.0206859	SE	Group2	Seedling
LOC_Os05g31900	NA	expressed protein	5	18569089	18569958	S5_18569896	G/A	5	18569896	4.28804e-05	0.410959	292	0.0688976	0.124725	-0.160729	SSD	Group2	Seedling
LOC_Os05g31900	NA	expressed protein	5	18569089	18569958	S5_18569896	G/A	5	18569896	5.6414e-06	0.439904	416	0.0825746	0.129688	0.0276506	SE	Group2	Seedling
LOC_Os05g31910	NA	white-brown complex homolog protein 16, putative, expressed	5	18575666	18578864	S5_18576348	T/C	5	18576348	6.86391e-05	0.409247	292	0.0688976	0.121669	0.411054	SSD	Group2	Seedling
LOC_Os05g31910	NA	white-brown complex homolog protein 16, putative, expressed	5	18575666	18578864	S5_18576348	T/C	5	18576348	7.93048e-06	0.438702	416	0.0825746	0.128162	-0.25365	SE	Group2	Seedling
LOC_Os05g31910	NA	white-brown complex homolog protein 16, putative, expressed	5	18575666	18578864	S5_18576596	T/C	5	18576596	5.75316e-05	0.405822	292	0.0688976	0.122814	-0.195348	SSD	Group2	Seedling
LOC_Os05g31910	NA	white-brown complex homolog protein 16, putative, expressed	5	18575666	18578864	S5_18576596	T/C	5	18576596	7.61836e-06	0.438702	416	0.0825746	0.128341	0.0659938	SE	Group2	Seedling
LOC_Os05g31920	NA	FYVE zinc finger domain containing protein, expressed	5	18586998	18595443	S5_18587961	T/C	5	18587961	5.29118e-05	0.378425	292	0.0688976	0.123357	-0.101605	SSD	Group2	Seedling
LOC_Os05g31920	NA	FYVE zinc finger domain containing protein, expressed	5	18586998	18595443	S5_18587961	T/C	5	18587961	4.77069e-06	0.413462	416	0.0825746	0.130441	0.10591	SE	Group2	Seedling
LOC_Os05g31920	NA	FYVE zinc finger domain containing protein, expressed	5	18586998	18595443	S5_18589842	G/A	5	18589842	5.36595e-05	0.378425	292	0.0688976	0.123266	0.17902	SSD	Group2	Seedling
LOC_Os05g31920	NA	FYVE zinc finger domain containing protein, expressed	5	18586998	18595443	S5_18589842	G/A	5	18589842	2.2978e-06	0.414663	416	0.0825746	0.133734	-0.0299986	SE	Group2	Seedling
LOC_Os06g01730	NA	DNA ligase I, putative, expressed	6	426063	430601	S6_429255	A/T	6	429255	8.08731e-05	0.0540541	259	0.0749619	0.133204	-0.458197	SE	Group1	Seedling
LOC_Os06g01730	NA	DNA ligase I, putative, expressed	6	426063	430601	S6_430446	T/C	6	430446	9.5474e-05	0.0637066	259	0.0749619	0.131993	0.231989	SE	Group1	Seedling
LOC_Os06g01740	NA	expressed protein	6	430837	434797	S6_432242	G/T	6	432242	6.47516e-05	0.0637066	259	0.0749619	0.13483	-0.311539	SE	Group1	Seedling
LOC_Os06g02019	KAO	cytochrome P450, putative, expressed	6	580665	586450	S6_584840	T/C	6	584840	2.10609e-05	0.0714286	259	0.0749619	0.14312	-0.00105001	SE	Group1	Seedling
LOC_Os06g18820	NA	serine threonine kinase, putative, expressed	6	10685596	10690032	S6_10687475	G/A	6	10687475	7.29068e-05	0.0637066	259	0.0749619	0.133962	-0.0629917	SE	Group1	Seedling
LOC_Os06g19740	NA	expressed protein	6	11283478	11292982	S6_11286795	C/T	6	11286795	6.34127e-05	0.0694981	259	0.0749619	0.134984	-0.541313	SE	Group1	Seedling
LOC_Os06g29994	NA	MATE efflux family protein, putative, expressed	6	17257330	17269681	S6_17264973	G/A	6	17264973	7.67628e-05	0.0564904	416	0.0825746	0.118108	-0.331099	SE	Group2	Seedling
LOC_Os06g37610	NA	Cyclopropane-fatty-acyl-phospholipid synthase, putative, expressed	6	22266800	22271149	S6_22267334	C/T	6	22267334	4.97571e-05	0.0579151	259	0.0749619	0.136764	-0.503306	SE	Group1	Seedling
LOC_Os06g37860	NA	transposon protein, putative, CACTA, En/Spm sub-class, expressed	6	22416503	22419644	S6_22417389	A/G	6	22417389	8.41575e-05	0.0559846	259	0.0749619	0.132913	NA	SE	Group1	Seedling
LOC_Os06g40240	NA	retrotransposon protein, putative, unclassified, expressed	6	23967708	23976387	S6_23975110	T/C	6	23975110	9.90369e-05	0.1139	259	0.0749619	0.131726	-0.0230495	SE	Group1	Seedling
LOC_Os06g42070	NA	expressed protein	6	25271744	25273844	S6_25273797	A/G	6	25273797	8.49113e-05	0.172945	292	0.0688976	0.120293	-0.0630367	SSD	Group2	Seedling
LOC_Os06g42130	NA	leucoanthocyanidin dioxygenase, putative, expressed	6	25295991	25297316	S6_25296413	A/G	6	25296413	7.93699e-05	0.280822	292	0.0688976	0.120729	-1.23821	SSD	Group2	Seedling
LOC_Os06g42180	NA	expressed protein	6	25322420	25324328	S6_25323661	T/C	6	25323661	5.91681e-05	0.166096	292	0.0688976	0.122632	-0.121195	SSD	Group2	Seedling
LOC_Os06g42230	NA	transposon protein, putative, unclassified, expressed	6	25357468	25359927	S6_25357657	A/G	6	25357657	4.27959e-05	0.169521	292	0.0688976	0.124738	-1.23821	SSD	Group2	Seedling
LOC_Os06g42320	NA	expressed protein	6	25419131	25419361	S6_25419208	G/C	6	25419208	7.99277e-05	0.166096	292	0.0688976	0.120684	-0.966338	SSD	Group2	Seedling
LOC_Os06g42370	NA	retrotransposon protein, putative, unclassified, expressed	6	25458983	25468466	S6_25462505	A/G	6	25462505	7.33199e-05	0.160959	292	0.0688976	0.121242	-0.0624388	SSD	Group2	Seedling
LOC_Os06g42380	NA	retrotransposon protein, putative, unclassified, expressed	6	25471430	25476080	S6_25474727	T/G	6	25474727	4.99372e-05	0.130137	292	0.0688976	0.123733	-0.315467	SSD	Group2	Seedling
LOC_Os06g42390	NA	expressed protein	6	25478609	25479510	S6_25478696	A/G	6	25478696	6.0662e-05	0.167808	292	0.0688976	0.12247	-0.529089	SSD	Group2	Seedling
LOC_Os06g43320	NA	cytochrome P450, putative, expressed	6	26034857	26038356	S6_26037167	T/A	6	26037167	2.03168e-05	0.138221	416	0.0825746	0.123969	0.135563	SE	Group2	Seedling
LOC_Os06g44180	NA	NAD dependent epimerase/dehydratase family protein, putative, expressed	6	26652829	26659263	S6_26653535	T/C	6	26653535	1.69992e-05	0.405048	416	0.0825746	0.124761	-0.168035	SE	Group2	Seedling
LOC_Os06g44180	NA	NAD dependent epimerase/dehydratase family protein, putative, expressed	6	26652829	26659263	S6_26656677	T/A	6	26656677	7.21595e-05	0.41226	416	0.0825746	0.118379	-0.27926	SE	Group2	Seedling
LOC_Os06g44180	NA	NAD dependent epimerase/dehydratase family protein, putative, expressed	6	26652829	26659263	S6_26656805	A/C	6	26656805	6.28311e-05	0.391827	416	0.0825746	0.118986	-0.191414	SE	Group2	Seedling
LOC_Os06g44180	NA	NAD dependent epimerase/dehydratase family protein, putative, expressed	6	26652829	26659263	S6_26656842	A/C	6	26656842	4.4313e-05	0.393029	416	0.0825746	0.120521	0.0804913	SE	Group2	Seedling
LOC_Os06g44180	NA	NAD dependent epimerase/dehydratase family protein, putative, expressed	6	26652829	26659263	S6_26656901	T/C	6	26656901	2.91731e-05	0.395433	416	0.0825746	0.122366	-0.104343	SE	Group2	Seedling
LOC_Os06g44180	NA	NAD dependent epimerase/dehydratase family protein, putative, expressed	6	26652829	26659263	S6_26656923	C/T	6	26656923	6.04133e-05	0.397837	416	0.0825746	0.119158	-0.203779	SE	Group2	Seedling
LOC_Os06g44180	NA	NAD dependent epimerase/dehydratase family protein, putative, expressed	6	26652829	26659263	S6_26657088	T/C	6	26657088	8.97479e-05	0.405048	416	0.0825746	0.117424	-0.0513745	SE	Group2	Seedling
LOC_Os06g44180	NA	NAD dependent epimerase/dehydratase family protein, putative, expressed	6	26652829	26659263	S6_26658211	T/C	6	26658211	7.71143e-05	0.415865	416	0.0825746	0.118088	-0.370896	SE	Group2	Seedling
LOC_Os06g44180	NA	NAD dependent epimerase/dehydratase family protein, putative, expressed	6	26652829	26659263	S6_26658587	A/G	6	26658587	4.73109e-05	0.417808	292	0.0688976	0.124085	0.170502	SSD	Group2	Seedling
LOC_Os06g44180	NA	NAD dependent epimerase/dehydratase family protein, putative, expressed	6	26652829	26659263	S6_26658614	G/A	6	26658614	5.39122e-05	0.451923	416	0.0825746	0.119658	0.153527	SE	Group2	Seedling
LOC_Os06g44190	NA	expressed protein	6	26660027	26660357	S6_26660274	A/G	6	26660274	5.69902e-05	0.40625	416	0.0825746	0.119414	0.261555	SE	Group2	Seedling
LOC_Os06g44200	NA	ZOS6-06 - C2H2 zinc finger protein, expressed	6	26660938	26664595	S6_26663148	T/C	6	26663148	4.95342e-05	0.403846	416	0.0825746	0.120031	0.375604	SE	Group2	Seedling
LOC_Os07g05450	NA	sulfotransferase domain containing protein, expressed	7	2509289	2510671	S7_2509936	T/C	7	2509936	9.91739e-05	0.0501931	259	0.0749619	0.131716	0.0682849	SE	Group1	Seedling
LOC_Os07g32100	NA	expressed protein	7	19073362	19074783	S7_19073666	G/T	7	19073666	5.49552e-05	0.190068	292	0.0688976	0.123111	0.549958	SSD	Group2	Seedling
LOC_Os07g32280	NA	hypothetical protein	7	19183976	19184711	S7_19184027	G/A	7	19184027	8.40137e-05	0.214041	292	0.0688976	0.120362	0.374584	SSD	Group2	Seedling
LOC_Os07g33410	NA	ATPase, AAA family protein, expressed	7	19970525	19974170	S7_19970533	G/C	7	19970533	7.57684e-05	0.0579151	259	0.0749619	0.13368	-0.00031497	SE	Group1	Seedling
LOC_Os07g36290	NA	OsFBX242 - F-box domain containing protein, expressed	7	21701620	21705667	S7_21704727	A/G	7	21704727	6.35254e-05	0.195913	416	0.0825746	0.118938	-0.334681	SE	Group2	Seedling
LOC_Os07g44080	NA	expressed protein	7	26347352	26350226	S7_26347801	T/C	7	26347801	9.89629e-05	0.340426	141	0.0830241	0.190752	1.30185	SSD	Group1	Seedling
LOC_Os08g10340	NA	OsFBX278 - F-box domain containing protein, expressed	8	6055587	6059017	S8_6056236	A/G	8	6056236	5.59924e-05	0.0540541	259	0.0749619	0.135896	-0.116391	SE	Group1	Seedling
LOC_Os08g42690	NA	ankyrin repeat domain containing protein, expressed	8	26982655	26986692	S8_26982892	A/G	8	26982892	9.87e-05	0.0772201	259	0.0749619	0.131751	-0.142807	SE	Group1	Seedling
LOC_Os08g42870	NA	expressed protein	8	27103314	27109475	S8_27103783	A/G	8	27103783	6.10099e-05	0.0656371	259	0.0749619	0.135267	0.139547	SE	Group1	Seedling
LOC_Os08g43090	NA	bZIP family transcription factor, putative, expressed	8	27237284	27241447	S8_27237301	C/T	8	27237301	1.4483e-05	0.0810811	259	0.0749619	0.145909	-0.0417061	SE	Group1	Seedling
LOC_Os08g43430	NA	CXE carboxylesterase, putative, expressed	8	27473382	27475042	S8_27473706	G/T	8	27473706	7.50327e-05	0.0637066	259	0.0749619	0.133752	-0.0469242	SE	Group1	Seedling
LOC_Os08g43560	OsAPX4	OsAPx4 - Peroxisomal Ascorbate Peroxidase encoding gene 5,8,9, expressed	8	27555021	27559370	S8_27557646	T/C	8	27557646	3.40806e-05	0.429087	416	0.0825746	0.121679	0.0828938	SE	Group2	Seedling
LOC_Os08g43560	OsAPX4	OsAPx4 - Peroxisomal Ascorbate Peroxidase encoding gene 5,8,9, expressed	8	27555021	27559370	S8_27557836	C/G	8	27557836	5.19648e-05	0.435096	416	0.0825746	0.11982	-0.0590392	SE	Group2	Seedling
LOC_Os08g44170	NA	transposon protein, putative, unclassified, expressed	8	27803034	27810005	S8_27808832	G/A	8	27808832	8.79397e-05	0.0579151	259	0.0749619	0.132592	-0.273899	SE	Group1	Seedling
LOC_Os08g44220	NA	GLTP domain containing protein, putative, expressed	8	27834547	27838106	S8_27835593	A/G	8	27835593	1.48101e-05	0.0714286	259	0.0749619	0.145743	0.239499	SE	Group1	Seedling
LOC_Os08g44220	NA	GLTP domain containing protein, putative, expressed	8	27834547	27838106	S8_27835609	G/T	8	27835609	2.73838e-05	0.0637066	259	0.0749619	0.141172	0.026846	SE	Group1	Seedling
LOC_Os09g11020	NA	NBS-LRR disease resistance protein, putative, expressed	9	6117013	6123691	S9_6123480	G/A	9	6123480	2.18006e-05	0.0851064	141	0.0830241	0.212533	NA	SSD	Group1	Seedling
LOC_Os09g11880	NA	retrotransposon protein, putative, unclassified, expressed	9	6665743	6666826	S9_6666650	T/C	9	6666650	3.30927e-06	0.247596	416	0.0825746	0.132087	-0.220513	SE	Group2	Seedling
LOC_Os09g12430	NA	hypothetical protein	9	7116134	7117458	S9_7117281	T/C	9	7117281	8.57344e-05	0.0851064	141	0.0830241	0.192791	NA	SSD	Group1	Seedling
LOC_Os09g13010	NA	hypothetical protein	9	7510531	7511835	S9_7511595	A/G	9	7511595	9.38818e-05	0.138221	416	0.0825746	0.117227	-0.132886	SE	Group2	Seedling
LOC_Os09g16260	NA	expressed protein	9	9921533	9926715	S9_9925453	A/T	9	9925453	5.47427e-05	0.391892	259	0.0749619	0.136062	0.396833	SE	Group1	Seedling
LOC_Os10g08754	NA	expressed protein	10	4744350	4747440	S10_4747233	A/G	10	4747233	4.79387e-05	0.111969	259	0.0749619	0.137038	-0.584381	SE	Group1	Seedling
LOC_Os10g37810	NA	transposon protein, putative, CACTA, En/Spm sub-class, expressed	10	20235382	20239138	S10_20237479	C/T	10	20237479	6.5771e-05	0.0873288	292	0.0688976	0.121946	-0.0823702	SSD	Group2	Seedling
LOC_Os10g39140	NA	flavonol synthase/flavanone 3-hydroxylase, putative, expressed	10	20886352	20892217	S10_20888897	A/G	10	20888897	1.22969e-05	0.240385	416	0.0825746	0.126202	-0.285717	SE	Group2	Seedling
LOC_Os11g05760	NA	OsProCP5 - Putative Lysosomal Pro-x Carboxypeptidase homologue, expressed	11	2640627	2646302	S11_2644663	T/C	11	2644663	1.64585e-06	0.0598456	259	0.0749619	0.162348	-0.847893	SE	Group1	Seedling
LOC_Os11g12830	NA	transposon protein, putative, CACTA, En/Spm sub-class, expressed	11	7278598	7280890	S11_7278790	G/T	11	7278790	8.73355e-05	0.0637066	259	0.0749619	0.132643	0.187864	SE	Group1	Seedling
LOC_Os11g30000	NA	retrotransposon protein, putative, unclassified, expressed	11	17440192	17449335	S11_17444364	A/G	11	17444364	4.41755e-05	0.070922	141	0.0830241	0.202285	0.0835905	SSD	Group1	Seedling
LOC_Os11g30000	NA	retrotransposon protein, putative, unclassified, expressed	11	17440192	17449335	S11_17444484	A/G	11	17444484	5.93552e-05	0.0921986	141	0.0830241	0.198041	-2.60852	SSD	Group1	Seedling
LOC_Os11g30000	NA	retrotransposon protein, putative, unclassified, expressed	11	17440192	17449335	S11_17444758	G/A	11	17444758	3.45938e-05	0.070922	141	0.0830241	0.205818	-1.55509	SSD	Group1	Seedling
LOC_Os11g30020	NA	retrotransposon protein, putative, Ty1-copia subclass, expressed	11	17456515	17464115	S11_17462701	C/G	11	17462701	7.91774e-05	0.117021	141	0.0830241	0.193923	-0.995584	SSD	Group1	Seedling
LOC_Os11g30170	NA	transposon protein, putative, unclassified, expressed	11	17538094	17543811	S11_17541467	T/C	11	17541467	7.39533e-05	0.219858	141	0.0830241	0.194896	1.52237	SSD	Group1	Seedling
LOC_Os11g30830	NA	expressed protein	11	17952858	17953400	S11_17953280	T/C	11	17953280	7.75808e-05	0.106178	259	0.0749619	0.133508	-0.227265	SE	Group1	Seedling
LOC_Os11g30840	NA	retrotransposon protein, putative, unclassified, expressed	11	17953632	17957208	S11_17954192	T/C	11	17954192	8.32218e-05	0.102317	259	0.0749619	0.132995	0.299479	SE	Group1	Seedling
LOC_Os11g30840	NA	retrotransposon protein, putative, unclassified, expressed	11	17953632	17957208	S11_17954304	A/G	11	17954304	7.75808e-05	0.106178	259	0.0749619	0.133508	0.162355	SE	Group1	Seedling
LOC_Os11g30840	NA	retrotransposon protein, putative, unclassified, expressed	11	17953632	17957208	S11_17955604	A/G	11	17955604	5.12942e-05	0.104247	259	0.0749619	0.13654	0.211415	SE	Group1	Seedling
LOC_Os11g30840	NA	retrotransposon protein, putative, unclassified, expressed	11	17953632	17957208	S11_17955729	G/T	11	17955729	1.39405e-06	0.106178	259	0.0749619	0.16362	-0.0614345	SE	Group1	Seedling
LOC_Os11g30840	NA	retrotransposon protein, putative, unclassified, expressed	11	17953632	17957208	S11_17956029	C/T	11	17956029	5.12942e-05	0.104247	259	0.0749619	0.13654	-0.740421	SE	Group1	Seedling
LOC_Os11g30840	NA	retrotransposon protein, putative, unclassified, expressed	11	17953632	17957208	S11_17956148	G/A	11	17956148	8.05723e-05	0.106178	259	0.0749619	0.133231	-0.0779052	SE	Group1	Seedling
LOC_Os11g30840	NA	retrotransposon protein, putative, unclassified, expressed	11	17953632	17957208	S11_17956260	A/C	11	17956260	5.12942e-05	0.104247	259	0.0749619	0.13654	-0.167359	SE	Group1	Seedling
LOC_Os11g30840	NA	retrotransposon protein, putative, unclassified, expressed	11	17953632	17957208	S11_17957021	C/T	11	17957021	1.62465e-05	0.102317	259	0.0749619	0.145052	-0.364464	SE	Group1	Seedling
LOC_Os11g30850	NA	retrotransposon protein, putative, Ty3-gypsy subclass	11	17960537	17961750	S11_17961294	A/G	11	17961294	9.08422e-05	0.106178	259	0.0749619	0.132355	0.552947	SE	Group1	Seedling
LOC_Os11g30850	NA	retrotransposon protein, putative, Ty3-gypsy subclass	11	17960537	17961750	S11_17961519	C/T	11	17961519	7.75808e-05	0.106178	259	0.0749619	0.133508	-0.546197	SE	Group1	Seedling
LOC_Os11g30860	NA	retrotransposon protein, putative, Ty3-gypsy subclass, expressed	11	17961928	17964939	S11_17962339	A/G	11	17962339	6.57782e-05	0.104247	259	0.0749619	0.134715	0.213643	SE	Group1	Seedling
LOC_Os11g30860	NA	retrotransposon protein, putative, Ty3-gypsy subclass, expressed	11	17961928	17964939	S11_17962746	A/G	11	17962746	7.36565e-06	0.108108	259	0.0749619	0.150977	-0.151234	SE	Group1	Seedling
LOC_Os11g30860	NA	retrotransposon protein, putative, Ty3-gypsy subclass, expressed	11	17961928	17964939	S11_17963154	A/G	11	17963154	1.78602e-05	0.100386	259	0.0749619	0.144346	0.0741709	SE	Group1	Seedling
LOC_Os11g30860	NA	retrotransposon protein, putative, Ty3-gypsy subclass, expressed	11	17961928	17964939	S11_17964737	G/A	11	17964737	2.52743e-05	0.108108	259	0.0749619	0.141766	-0.298623	SE	Group1	Seedling
LOC_Os11g35840	NA	expressed protein	11	21031351	21036754	S11_21036744	T/G	11	21036744	9.06554e-05	0.157452	416	0.0825746	0.11738	0.00413412	SE	Group2	Seedling
LOC_Os11g37100	NA	expressed protein	11	21906342	21909267	S11_21909012	G/T	11	21909012	2.05107e-05	0.108108	259	0.0749619	0.143317	0.243806	SE	Group1	Seedling
LOC_Os11g37170	NA	retrotransposon protein, putative, Ty3-gypsy subclass, expressed	11	21944547	21951020	S11_21947453	T/C	11	21947453	6.90504e-05	0.0907336	259	0.0749619	0.13436	-0.207511	SE	Group1	Seedling
LOC_Os11g45940	NA	expressed protein	11	27799133	27800295	S11_27799243	A/G	11	27799243	2.92758e-05	0.144231	416	0.0825746	0.122351	0.0101307	SE	Group2	Seedling
LOC_Os12g01574	NA	expressed protein	12	346323	350645	S12_349432	A/G	12	349432	6.8136e-05	0.320463	259	0.0749619	0.134457	-0.274346	SE	Group1	Seedling
LOC_Os12g01610	NA	retrotransposon protein, putative, unclassified, expressed	12	366357	366983	S12_366574	T/C	12	366574	6.89701e-05	0.320463	259	0.0749619	0.134368	1.22861	SE	Group1	Seedling
LOC_Os12g01620	NA	expressed protein	12	374598	379382	S12_377557	G/T	12	377557	5.81744e-05	0.314672	259	0.0749619	0.135616	-0.20445	SE	Group1	Seedling
LOC_Os12g01690	NA	prenylated rab acceptor, putative, expressed	12	414959	415621	S12_415562	A/G	12	415562	8.50411e-05	0.328185	259	0.0749619	0.132837	-0.64796	SE	Group1	Seedling
LOC_Os12g01710	NA	expressed protein	12	422126	425359	S12_423274	T/C	12	423274	9.52594e-05	0.316602	259	0.0749619	0.132009	-0.43178	SE	Group1	Seedling
LOC_Os12g01710	NA	expressed protein	12	422126	425359	S12_424056	T/C	12	424056	6.60945e-05	0.318533	259	0.0749619	0.13468	NA	SE	Group1	Seedling
LOC_Os12g01780	NA	retrotransposon protein, putative, Ty1-copia subclass, expressed	12	473751	477819	S12_475496	A/C	12	475496	4.52605e-05	0.252896	259	0.0749619	0.137461	-0.324784	SE	Group1	Seedling
LOC_Os12g01780	NA	retrotransposon protein, putative, Ty1-copia subclass, expressed	12	473751	477819	S12_477551	T/C	12	477551	4.51628e-05	0.241313	259	0.0749619	0.137477	-0.599594	SE	Group1	Seedling
LOC_Os12g01790	NA	retrotransposon protein, putative, unclassified, expressed	12	478528	482911	S12_478823	A/G	12	478823	5.73587e-05	0.243243	259	0.0749619	0.13572	NA	SE	Group1	Seedling
LOC_Os12g01790	NA	retrotransposon protein, putative, unclassified, expressed	12	478528	482911	S12_481418	T/C	12	481418	8.59593e-05	0.235521	259	0.0749619	0.132758	-0.542582	SE	Group1	Seedling
LOC_Os12g01790	NA	retrotransposon protein, putative, unclassified, expressed	12	478528	482911	S12_481593	T/C	12	481593	2.0115e-05	0.22973	259	0.0749619	0.143462	-0.597442	SE	Group1	Seedling
LOC_Os12g01800	NA	DNA cytosine methyltransferase Zmet3, putative, expressed	12	483987	486738	S12_485113	T/C	12	485113	9.92927e-05	0.247104	259	0.0749619	0.131707	-0.306589	SE	Group1	Seedling
LOC_Os12g01820	NA	ATCHX, putative, expressed	12	490788	493834	S12_493403	T/G	12	493403	3.66309e-05	0.245174	259	0.0749619	0.13902	NA	SE	Group1	Seedling
LOC_Os12g01850	NA	pentatricopeptide, putative, expressed	12	496700	502261	S12_497040	G/A	12	497040	4.45416e-05	0.247104	259	0.0749619	0.137579	-0.331495	SE	Group1	Seedling
LOC_Os12g01850	NA	pentatricopeptide, putative, expressed	12	496700	502261	S12_501847	T/C	12	501847	3.76921e-05	0.239382	259	0.0749619	0.138809	NA	SE	Group1	Seedling
LOC_Os12g01900	NA	retrotransposon protein, putative, unclassified, expressed	12	524051	530565	S12_529110	T/C	12	529110	1.39579e-05	0.237452	259	0.0749619	0.146185	-0.183774	SE	Group1	Seedling
LOC_Os12g01900	NA	retrotransposon protein, putative, unclassified, expressed	12	524051	530565	S12_529218	T/C	12	529218	4.5438e-06	0.235521	259	0.0749619	0.154622	-0.365498	SE	Group1	Seedling
LOC_Os12g01900	NA	retrotransposon protein, putative, unclassified, expressed	12	524051	530565	S12_529577	T/C	12	529577	5.77653e-05	0.200772	259	0.0749619	0.135668	NA	SE	Group1	Seedling
LOC_Os12g01922	NA	WD domain and HEAT domain containing protein, putative, expressed	12	541268	550495	S12_547945	T/G	12	547945	4.39426e-05	0.237452	259	0.0749619	0.137678	0.0354609	SE	Group1	Seedling
LOC_Os12g01922	NA	WD domain and HEAT domain containing protein, putative, expressed	12	541268	550495	S12_549376	C/T	12	549376	2.25085e-05	0.235521	259	0.0749619	0.142626	0.0132103	SE	Group1	Seedling
LOC_Os12g02094	NA	saposin-like type B, region 1 family protein, putative, expressed	12	628305	630983	S12_629709	C/T	12	629709	9.37489e-05	0.243243	259	0.0749619	0.132126	0.414291	SE	Group1	Seedling
LOC_Os12g02100	NA	expressed protein	12	632401	638030	S12_635931	A/T	12	635931	8.06026e-05	0.247104	259	0.0749619	0.133228	0.244227	SE	Group1	Seedling
LOC_Os12g02120	NA	dual specificity protein phosphatase, putative, expressed	12	639746	646685	S12_643236	C/T	12	643236	4.9938e-05	0.233591	259	0.0749619	0.136737	0.603788	SE	Group1	Seedling
LOC_Os12g39170	NA	OsSCP66 - Putative Serine Carboxypeptidase homologue, expressed	12	24108583	24114702	S12_24113690	G/A	12	24113690	7.93894e-05	0.0637066	259	0.0749619	0.133339	0.661211	SE	Group1	Seedling
LOC_Os12g41200	NA	KIP1, putative, expressed	12	25536085	25544911	S12_25536474	G/C	12	25536474	2.97986e-07	0.0521236	259	0.0749619	0.175538	-0.393091	SE	Group1	Seedling
LOC_Os01g01900	NA	retrotransposon protein, putative, unclassified, expressed	1	488085	492952	S1_488697	G/T	1	488697	6.38714e-05	0.0625	184	0.0118261	0.103881	0.361764	PN	Group1	Stress_Y16
LOC_Os01g01920	WFSL1	HD domain containing protein 2, putative, expressed	1	498454	506264	S1_498834	A/T	1	498834	5.0747e-05	0.0652174	184	0.0118261	0.106508	0.474402	PN	Group1	Stress_Y16
LOC_Os01g02050	NA	phosphoenolpyruvate carboxylase, putative, expressed	1	562056	572138	S1_563378	A/G	1	563378	9.85145e-05	0.0679348	184	0.0118261	0.0989596	0.144149	PN	Group1	Stress_Y16
LOC_Os01g03300	NA	seven in absentia protein family protein, expressed	1	1335864	1337407	S1_1335949	G/C	1	1335949	3.55944e-05	0.0516304	184	0.0118261	0.110577	1.29514	PN	Group1	Stress_Y16
LOC_Os01g03300	NA	seven in absentia protein family protein, expressed	1	1335864	1337407	S1_1335951	C/G	1	1335951	3.55944e-05	0.0516304	184	0.0118261	0.110577	-1.48243	PN	Group1	Stress_Y16
LOC_Os01g04250	NA	expressed protein	1	1876913	1879903	S1_1877384	A/G	1	1877384	9.19243e-05	0.0923913	184	0.0118261	0.0997435	0.511061	PN	Group1	Stress_Y16
LOC_Os01g05040	NA	expressed protein	1	2369529	2371316	S1_2370376	G/A	1	2370376	4.70201e-05	0.109756	205	0.076618	0.156161	NA	FGN	Group1	Stress_Y16
LOC_Os01g05710	NA	expressed protein	1	2722518	2724797	S1_2723439	T/C	1	2723439	7.19349e-05	0.0839416	137	-0.0194531	0.109361	-0.120135	GY	Group1	Stress_Y16
LOC_Os01g06160	NA	retrotransposon protein, putative, Ty3-gypsy subclass, expressed	1	2934728	2937718	S1_2937062	A/G	1	2937062	4.04981e-06	0.115142	317	0.046649	0.11371	3.04621	SSR	Group2	Stress_Y16
LOC_Os01g06490	NA	OsSCP1 - Putative Serine Carboxypeptidase homologue, expressed	1	3054465	3057198	S1_3056834	A/G	1	3056834	8.30287e-05	0.375912	137	-0.0194531	0.107011	NA	GY	Group1	Stress_Y16
LOC_Os01g06560	NA	transcription factor HBP-1b, putative, expressed	1	3091123	3092865	S1_3091319	A/G	1	3091319	8.39e-05	0.346715	137	-0.0194531	0.10684	NA	GY	Group1	Stress_Y16
LOC_Os01g06560	NA	transcription factor HBP-1b, putative, expressed	1	3091123	3092865	S1_3091340	A/T	1	3091340	7.81796e-05	0.364964	137	-0.0194531	0.107996	NA	GY	Group1	Stress_Y16
LOC_Os01g06730	NA	verticillium wilt disease resistance protein, putative, expressed	1	3181950	3185346	S1_3184964	A/G	1	3184964	4.63829e-05	0.0865633	387	0.00708178	0.0510985	0.0692751	SN	Group2	Stress_Y16
LOC_Os01g06820	NA	hcr2-0B, putative, expressed	1	3235987	3237799	S1_3236865	G/A	1	3236865	9.58595e-05	0.100775	387	0.00708178	0.0473801	-0.659054	SN	Group2	Stress_Y16
LOC_Os01g06836	NA	disease resistance protein SlVe2 precursor, putative, expressed	1	3241127	3243315	S1_3241542	C/T	1	3241542	9.47e-05	0.0671835	387	0.00708178	0.0474422	0.0608998	SN	Group2	Stress_Y16
LOC_Os01g07070	NA	transposon protein, putative, CACTA, En/Spm sub-class, expressed	1	3322774	3328256	S1_3323697	C/A	1	3323697	9.98924e-05	0.0852713	387	0.00708178	0.0471699	-0.311182	SN	Group2	Stress_Y16
LOC_Os01g08960	NA	phosducin-like protein 3, putative, expressed	1	4494598	4497627	S1_4497391	C/G	1	4497391	3.72785e-05	0.23817	317	0.046649	0.099969	4.07184	SSR	Group2	Stress_Y16
LOC_Os01g09300	NA	oxidoreductase, putative, expressed	1	4726659	4731243	S1_4727652	A/G	1	4727652	7.91403e-05	0.119565	184	0.0118261	0.101442	-0.126049	PN	Group1	Stress_Y16
LOC_Os01g16200	NA	serpin domain containing protein, putative, expressed	1	9171628	9172899	S1_9172024	T/C	1	9172024	1.62906e-05	0.0541872	203	0.0411146	0.135225	0.32302	TSN	Group1	Stress_Y16
LOC_Os01g18130	NA	expressed protein	1	10156418	10158682	S1_10157814	C/T	1	10157814	6.0391e-05	0.0907692	325	0.0606353	0.109003	-0.139731	PN	Group2	Stress_Y16
LOC_Os01g18130	NA	expressed protein	1	10156418	10158682	S1_10158164	G/A	1	10158164	9.91751e-05	0.0907692	325	0.0606353	0.106116	0.131305	PN	Group2	Stress_Y16
LOC_Os01g18130	NA	expressed protein	1	10156418	10158682	S1_10158222	T/C	1	10158222	6.96392e-05	0.0907692	325	0.0606353	0.108172	-0.156094	PN	Group2	Stress_Y16
LOC_Os01g18180	NA	transposon protein, putative, CACTA, En/Spm sub-class, expressed	1	10174741	10177583	S1_10175093	C/A	1	10175093	9.20726e-05	0.0830769	325	0.0606353	0.106547	-0.37044	PN	Group2	Stress_Y16
LOC_Os01g18180	NA	transposon protein, putative, CACTA, En/Spm sub-class, expressed	1	10174741	10177583	S1_10175485	A/G	1	10175485	3.99985e-05	0.0923077	325	0.0606353	0.111413	0.379444	PN	Group2	Stress_Y16
LOC_Os01g18200	NA	transposon protein, putative, CACTA, En/Spm sub-class	1	10185178	10188342	S1_10187253	A/G	1	10187253	5.91179e-05	0.12	325	0.0606353	0.109127	0.466515	PN	Group2	Stress_Y16
LOC_Os01g18200	NA	transposon protein, putative, CACTA, En/Spm sub-class	1	10185178	10188342	S1_10187275	A/G	1	10187275	8.00406e-05	0.107692	325	0.0606353	0.107361	0.235142	PN	Group2	Stress_Y16
LOC_Os01g18200	NA	transposon protein, putative, CACTA, En/Spm sub-class	1	10185178	10188342	S1_10187965	A/G	1	10187965	7.90538e-05	0.0923077	325	0.0606353	0.107433	0.277811	PN	Group2	Stress_Y16
LOC_Os01g18200	NA	transposon protein, putative, CACTA, En/Spm sub-class	1	10185178	10188342	S1_10187995	A/G	1	10187995	5e-05	0.0892308	325	0.0606353	0.110106	-0.141358	PN	Group2	Stress_Y16
LOC_Os01g18200	NA	transposon protein, putative, CACTA, En/Spm sub-class	1	10185178	10188342	S1_10188024	T/C	1	10188024	3.34548e-05	0.0907692	325	0.0606353	0.112462	-0.419399	PN	Group2	Stress_Y16
LOC_Os01g18200	NA	transposon protein, putative, CACTA, En/Spm sub-class	1	10185178	10188342	S1_10188120	T/C	1	10188120	4.77848e-05	0.0876923	325	0.0606353	0.110371	-0.248607	PN	Group2	Stress_Y16
LOC_Os01g18200	NA	transposon protein, putative, CACTA, En/Spm sub-class	1	10185178	10188342	S1_10188158	T/C	1	10188158	8.52787e-05	0.0876923	325	0.0606353	0.106992	-0.131793	PN	Group2	Stress_Y16
LOC_Os01g18200	NA	transposon protein, putative, CACTA, En/Spm sub-class	1	10185178	10188342	S1_10188316	T/C	1	10188316	6.28392e-05	0.0892308	325	0.0606353	0.108771	-0.339348	PN	Group2	Stress_Y16
LOC_Os01g18210	NA	peptidyl-prolyl cis-trans isomerase, putative, expressed	1	10193643	10196775	S1_10195388	A/G	1	10195388	7.20209e-05	0.0923077	325	0.0606353	0.107976	-0.337631	PN	Group2	Stress_Y16
LOC_Os01g18210	NA	peptidyl-prolyl cis-trans isomerase, putative, expressed	1	10193643	10196775	S1_10195949	C/T	1	10195949	6.28392e-05	0.0892308	325	0.0606353	0.108771	0.399057	PN	Group2	Stress_Y16
LOC_Os01g18220	NA	expressed protein	1	10200476	10203694	S1_10200611	T/G	1	10200611	8.87989e-05	0.0923077	325	0.0606353	0.106757	0.474544	PN	Group2	Stress_Y16
LOC_Os01g18220	NA	expressed protein	1	10200476	10203694	S1_10202041	T/A	1	10202041	4.19926e-05	0.0892308	325	0.0606353	0.111128	-0.184668	PN	Group2	Stress_Y16
LOC_Os01g18240	MYB61|OsMYB61	MYB family transcription factor, putative, expressed	1	10217247	10219696	S1_10217743	C/T	1	10217743	6.28392e-05	0.0892308	325	0.0606353	0.108771	0.385147	PN	Group2	Stress_Y16
LOC_Os01g18240	MYB61|OsMYB61	MYB family transcription factor, putative, expressed	1	10217247	10219696	S1_10218069	A/T	1	10218069	3.96488e-05	0.0907692	325	0.0606353	0.111465	-0.259335	PN	Group2	Stress_Y16
LOC_Os01g18250	NA	subtilase, putative, expressed	1	10234933	10236023	S1_10235075	A/G	1	10235075	1.00637e-05	0.104615	325	0.0606353	0.119566	0.103035	PN	Group2	Stress_Y16
LOC_Os01g18270	NA	transposon protein, putative, CACTA, En/Spm sub-class, expressed	1	10254826	10260612	S1_10259147	A/T	1	10259147	4.77848e-05	0.0876923	325	0.0606353	0.110371	0.198107	PN	Group2	Stress_Y16
LOC_Os01g18270	NA	transposon protein, putative, CACTA, En/Spm sub-class, expressed	1	10254826	10260612	S1_10259701	T/G	1	10259701	4.68629e-05	0.1	325	0.0606353	0.110485	0.361863	PN	Group2	Stress_Y16
LOC_Os01g18280	NA	SNF7 domain containing protein, putative, expressed	1	10262946	10267962	S1_10262996	T/C	1	10262996	8.53729e-05	0.135385	325	0.0606353	0.106986	-0.450471	PN	Group2	Stress_Y16
LOC_Os01g18280	NA	SNF7 domain containing protein, putative, expressed	1	10262946	10267962	S1_10266603	C/T	1	10266603	8.73516e-05	0.0938462	325	0.0606353	0.106853	0.437994	PN	Group2	Stress_Y16
LOC_Os01g18280	NA	SNF7 domain containing protein, putative, expressed	1	10262946	10267962	S1_10267129	A/G	1	10267129	4.9117e-05	0.0876923	325	0.0606353	0.11021	0.0715606	PN	Group2	Stress_Y16
LOC_Os01g18280	NA	SNF7 domain containing protein, putative, expressed	1	10262946	10267962	S1_10267334	A/G	1	10267334	9.45636e-05	0.0923077	325	0.0606353	0.106392	0.316528	PN	Group2	Stress_Y16
LOC_Os01g18300	NA	expressed protein	1	10283535	10283921	S1_10283633	G/A	1	10283633	1.12624e-05	0.193846	325	0.0606353	0.118897	0.383074	PN	Group2	Stress_Y16
LOC_Os01g18300	NA	expressed protein	1	10283535	10283921	S1_10283739	G/A	1	10283739	1.8437e-05	0.193846	325	0.0606353	0.115974	-0.42711	PN	Group2	Stress_Y16
LOC_Os01g18300	NA	expressed protein	1	10283535	10283921	S1_10283793	G/A	1	10283793	5.52122e-05	0.184615	325	0.0606353	0.109526	0.244295	PN	Group2	Stress_Y16
LOC_Os01g18300	NA	expressed protein	1	10283535	10283921	S1_10283803	T/C	1	10283803	2.44655e-05	0.158462	325	0.0606353	0.114304	-0.406506	PN	Group2	Stress_Y16
LOC_Os01g18300	NA	expressed protein	1	10283535	10283921	S1_10283817	G/A	1	10283817	5.52122e-05	0.184615	325	0.0606353	0.109526	-0.341061	PN	Group2	Stress_Y16
LOC_Os01g18300	NA	expressed protein	1	10283535	10283921	S1_10283818	C/T	1	10283818	3.18601e-05	0.16	325	0.0606353	0.112749	0.390568	PN	Group2	Stress_Y16
LOC_Os01g18300	NA	expressed protein	1	10283535	10283921	S1_10283844	T/C	1	10283844	2.31719e-05	0.16	325	0.0606353	0.114624	2.61618	PN	Group2	Stress_Y16
LOC_Os01g18300	NA	expressed protein	1	10283535	10283921	S1_10283878	G/A	1	10283878	2.59525e-05	0.16	325	0.0606353	0.113956	0.162465	PN	Group2	Stress_Y16
LOC_Os01g18320	NA	protoporphyrinogen oxidase, chloroplast precursor, putative, expressed	1	10291889	10295536	S1_10294211	T/C	1	10294211	7.22933e-05	0.0907692	325	0.0606353	0.107954	0.314193	PN	Group2	Stress_Y16
LOC_Os01g18320	NA	protoporphyrinogen oxidase, chloroplast precursor, putative, expressed	1	10291889	10295536	S1_10294708	T/C	1	10294708	8.18311e-05	0.0938462	325	0.0606353	0.107232	0.189812	PN	Group2	Stress_Y16
LOC_Os01g18320	NA	protoporphyrinogen oxidase, chloroplast precursor, putative, expressed	1	10291889	10295536	S1_10295394	G/A	1	10295394	6.28392e-05	0.0892308	325	0.0606353	0.108771	-0.280487	PN	Group2	Stress_Y16
LOC_Os01g18700	NA	retrotransposon protein, putative, unclassified, expressed	1	10544971	10547148	S1_10546733	T/C	1	10546733	2.1669e-05	0.06	325	0.0606353	0.11502	-0.258492	PN	Group2	Stress_Y16
LOC_Os01g22810	NA	hypothetical protein	1	12819228	12820200	S1_12820118	T/C	1	12820118	3.49242e-05	0.05625	80	-0.0411047	0.224434	NA	TGW	Group1	Stress_Y16
LOC_Os01g22830	NA	retrotransposon protein, putative, Ty3-gypsy subclass, expressed	1	12827289	12830974	S1_12830176	A/G	1	12830176	4.71755e-05	0.05625	80	-0.0411047	0.214571	-0.623132	TGW	Group1	Stress_Y16
LOC_Os01g22840	NA	retrotransposon protein, putative, Ty3-gypsy subclass, expressed	1	12832002	12835327	S1_12832772	A/G	1	12832772	4.45899e-05	0.05	80	-0.0411047	0.216413	-0.765117	TGW	Group1	Stress_Y16
LOC_Os01g22850	NA	retrotransposon protein, putative, Ty3-gypsy subclass	1	12838715	12840323	S1_12840139	T/C	1	12840139	8.55635e-05	0.05	80	-0.0411047	0.195309	1.33177	TGW	Group1	Stress_Y16
LOC_Os01g22880	NA	expressed protein	1	12858637	12859368	S1_12858709	G/C	1	12858709	5.00999e-05	0.170543	387	0.00708178	0.0507023	-0.144175	SN	Group2	Stress_Y16
LOC_Os01g22910	NA	retrotransposon protein, putative, unclassified, expressed	1	12875498	12882540	S1_12877188	C/T	1	12877188	1.32074e-05	0.05625	80	-0.0411047	0.256956	1.19437	TGW	Group1	Stress_Y16
LOC_Os01g23640	NA	mov34/MPN/PAD-1 family protein, expressed	1	13296332	13305295	S1_13297509	G/C	1	13297509	4.45899e-05	0.05	80	-0.0411047	0.216413	-0.366467	TGW	Group1	Stress_Y16
LOC_Os01g23670	NA	retrotransposon protein, putative, unclassified	1	13314434	13315391	S1_13315312	A/T	1	13315312	4.45899e-05	0.05	80	-0.0411047	0.216413	-0.265673	TGW	Group1	Stress_Y16
LOC_Os01g25090	NA	transposon protein, putative, CACTA, En/Spm sub-class, expressed	1	14163295	14165284	S1_14164955	T/C	1	14164955	6.09849e-05	0.169463	298	0.0223987	0.0774291	-0.383747	GY	Group2	Stress_Y16
LOC_Os01g41400	NA	transmembrane amino acid transporter protein, putative, expressed	1	23439509	23441397	S1_23441160	G/C	1	23441160	1.59269e-05	0.0662461	317	0.046649	0.105196	-0.371913	SSR	Group2	Stress_Y16
LOC_Os01g41400	NA	transmembrane amino acid transporter protein, putative, expressed	1	23439509	23441397	S1_23441161	G/A	1	23441161	6.99416e-06	0.0662461	317	0.046649	0.110298	-0.380201	SSR	Group2	Stress_Y16
LOC_Os01g41400	NA	transmembrane amino acid transporter protein, putative, expressed	1	23439509	23441397	S1_23441162	T/C	1	23441162	2.33578e-05	0.0646688	317	0.046649	0.102836	-1.42231	SSR	Group2	Stress_Y16
LOC_Os01g41400	NA	transmembrane amino acid transporter protein, putative, expressed	1	23439509	23441397	S1_23441163	G/C	1	23441163	2.64014e-05	0.0646688	317	0.046649	0.102084	0.0496651	SSR	Group2	Stress_Y16
LOC_Os01g41960	NA	retrotransposon protein, putative, unclassified, expressed	1	23787960	23796972	S1_23790681	A/G	1	23790681	7.47198e-05	0.433498	203	0.0411146	0.119985	-13.5691	TSN	Group1	Stress_Y16
LOC_Os01g41980	NA	retrotransposon protein, putative, unclassified, expressed	1	23806124	23808853	S1_23806838	A/G	1	23806838	8.09536e-05	0.190244	205	0.076618	0.151026	-1.75148	FGN	Group1	Stress_Y16
LOC_Os01g47400	NA	OsMan01 - Endo-Beta-Mannanase, expressed	1	27081806	27085681	S1_27082320	T/C	1	27082320	5.65661e-05	0.0555556	387	0.00708178	0.050079	-0.027021	SN	Group2	Stress_Y16
LOC_Os01g47420	NA	pterin-4-alpha-carbinolamine dehydratase, putative, expressed	1	27095458	27100314	S1_27095867	G/C	1	27095867	8.09602e-05	0.0594315	387	0.00708178	0.0482428	0.0700182	SN	Group2	Stress_Y16
LOC_Os01g47430	NA	protein of unknown function DUF1296 domain containing protein, expressed	1	27102119	27110016	S1_27103601	A/T	1	27103601	1.43116e-05	0.0555556	387	0.00708178	0.0571803	-0.120643	SN	Group2	Stress_Y16
LOC_Os01g47450	NA	OsCttP1 - Putative C-terminal processing peptidase homologue, expressed	1	27115662	27121178	S1_27119014	T/C	1	27119014	2.98725e-05	0.0594315	387	0.00708178	0.053366	-0.463283	SN	Group2	Stress_Y16
LOC_Os01g47460	NA	expressed protein	1	27123486	27129401	S1_27123715	T/C	1	27123715	3.36076e-05	0.0607235	387	0.00708178	0.0527579	0.171258	SN	Group2	Stress_Y16
LOC_Os01g47460	NA	expressed protein	1	27123486	27129401	S1_27124620	T/G	1	27124620	6.77915e-05	0.0581395	387	0.00708178	0.049151	-0.147887	SN	Group2	Stress_Y16
LOC_Os01g47460	NA	expressed protein	1	27123486	27129401	S1_27125130	T/G	1	27125130	7.366e-05	0.0620155	387	0.00708178	0.048726	-0.0775033	SN	Group2	Stress_Y16
LOC_Os01g47460	NA	expressed protein	1	27123486	27129401	S1_27128323	T/C	1	27128323	7.96715e-05	0.0607235	387	0.00708178	0.0483248	0.150882	SN	Group2	Stress_Y16
LOC_Os01g47490	NA	Lg106, putative, expressed	1	27144907	27149034	S1_27146001	G/A	1	27146001	7.07302e-05	0.0594315	387	0.00708178	0.0489337	-0.125027	SN	Group2	Stress_Y16
LOC_Os01g47500	NA	expressed protein	1	27151992	27153258	S1_27152997	G/A	1	27152997	4.16551e-05	0.0710594	387	0.00708178	0.0516516	-0.176447	SN	Group2	Stress_Y16
LOC_Os01g47510	NA	retrotransposon protein, putative, unclassified, expressed	1	27155525	27158677	S1_27155709	G/A	1	27155709	7.13303e-05	0.0633075	387	0.00708178	0.0488905	0.0207353	SN	Group2	Stress_Y16
LOC_Os01g47520	NA	hypothetical protein	1	27159277	27162221	S1_27161790	G/A	1	27161790	8.57917e-05	0.142119	387	0.00708178	0.0479466	-0.0255322	SN	Group2	Stress_Y16
LOC_Os01g47520	NA	hypothetical protein	1	27159277	27162221	S1_27161792	C/T	1	27161792	8.62471e-05	0.143411	387	0.00708178	0.0479195	0.0361872	SN	Group2	Stress_Y16
LOC_Os01g49065	NA	expressed protein	1	28193378	28196715	S1_28193605	G/C	1	28193605	8.01889e-05	0.108527	387	0.00708178	0.0482917	-0.103284	SN	Group2	Stress_Y16
LOC_Os01g49420	NA	retrotransposon protein, putative, unclassified, expressed	1	28423023	28425166	S1_28423824	T/C	1	28423824	7.17888e-05	0.157623	387	0.00708178	0.0488577	0.0617239	SN	Group2	Stress_Y16
LOC_Os01g51190	NA	expressed protein	1	29423421	29428115	S1_29425539	G/T	1	29425539	4.08373e-05	0.0968992	387	0.00708178	0.0517537	-0.0132476	SN	Group2	Stress_Y16
LOC_Os01g51190	NA	expressed protein	1	29423421	29428115	S1_29425540	G/T	1	29425540	3.85282e-05	0.0956072	387	0.00708178	0.0520535	0.106791	SN	Group2	Stress_Y16
LOC_Os01g51190	NA	expressed protein	1	29423421	29428115	S1_29425543	C/T	1	29425543	4.81638e-05	0.0968992	387	0.00708178	0.0509048	-0.0996098	SN	Group2	Stress_Y16
LOC_Os01g51360	NA	lipase, putative, expressed	1	29529726	29532847	S1_29530774	T/C	1	29530774	4.12782e-05	0.0981912	387	0.00708178	0.0516984	0.148353	SN	Group2	Stress_Y16
LOC_Os01g51380	NA	ATP synthase, putative, expressed	1	29536683	29542409	S1_29540467	G/A	1	29540467	8.51002e-05	0.0762274	387	0.00708178	0.0479879	-0.107938	SN	Group2	Stress_Y16
LOC_Os01g51380	NA	ATP synthase, putative, expressed	1	29536683	29542409	S1_29540742	C/T	1	29540742	8.55724e-05	0.0813953	387	0.00708178	0.0479597	0.170817	SN	Group2	Stress_Y16
LOC_Os01g51410	NA	glycine dehydrogenase, putative, expressed	1	29560350	29567065	S1_29563210	A/T	1	29563210	7.52831e-05	0.0775194	387	0.00708178	0.0486145	-0.0958924	SN	Group2	Stress_Y16
LOC_Os01g51950	NA	retrotransposon protein, putative, unclassified, expressed	1	29860846	29866424	S1_29862646	C/A	1	29862646	5.89989e-05	0.121447	387	0.00708178	0.049863	-0.11737	SN	Group2	Stress_Y16
LOC_Os01g57073	NA	insulin-degrading enzyme, putative, expressed	1	32965305	32977407	S1_32966770	T/A	1	32966770	5.1256e-05	0.103359	387	0.00708178	0.0505851	0.294516	SN	Group2	Stress_Y16
LOC_Os01g67330	NA	nucleotide-sugar transporter family protein, putative, expressed	1	39085081	39091029	S1_39085203	T/G	1	39085203	3.38499e-05	0.0590909	220	0.0298025	0.11037	0.186128	TGW	Group2	Stress_Y16
LOC_Os01g71200	NA	RNA recognition motif containing protein, putative, expressed	1	41193350	41198976	S1_41193578	A/C	1	41193578	3.64675e-05	0.146688	317	0.046649	0.100104	1.94154	SSR	Group2	Stress_Y16
LOC_Os02g01740	NA	U5 small nuclear ribonucleoprotein 200 kDa helicase, putative, expressed	2	410661	418523	S2_411591	T/C	2	411591	9.04306e-05	0.239377	353	0.204667	0.240427	1.19485	TSN	Group2	Stress_Y16
LOC_Os02g01740	NA	U5 small nuclear ribonucleoprotein 200 kDa helicase, putative, expressed	2	410661	418523	S2_414222	T/C	2	414222	8.78102e-05	0.240793	353	0.204667	0.24056	-1.39278	TSN	Group2	Stress_Y16
LOC_Os02g01820	NA	ABC2 homolog 4, putative, expressed	2	451471	454309	S2_452911	C/T	2	452911	8.18876e-05	0.140227	353	0.204667	0.240875	-2.34003	TSN	Group2	Stress_Y16
LOC_Os02g03870	NA	periplasmic beta-glucosidase precursor, putative, expressed	2	1643966	1648808	S2_1648268	G/C	2	1648268	8.48582e-05	0.147287	387	0.00708178	0.0480025	0.582161	SN	Group2	Stress_Y16
LOC_Os02g08020	NA	hypothetical protein	2	4214155	4215194	S2_4214594	A/G	2	4214594	4.3067e-05	0.0597826	184	0.0118261	0.108387	-0.54152	PN	Group1	Stress_Y16
LOC_Os02g08020	NA	hypothetical protein	2	4214155	4215194	S2_4215183	T/C	2	4215183	2.68646e-05	0.0543478	184	0.0118261	0.113821	-0.218158	PN	Group1	Stress_Y16
LOC_Os02g08020	NA	hypothetical protein	2	4214155	4215194	S2_4215187	G/A	2	4215187	7.73074e-05	0.0516304	184	0.0118261	0.101708	-0.439499	PN	Group1	Stress_Y16
LOC_Os02g17440	NA	retrotransposon protein, putative, unclassified, expressed	2	10034584	10038862	S2_10037080	A/G	2	10037080	5.03051e-05	0.0878187	353	0.204667	0.243079	0.605002	TSN	Group2	Stress_Y16
LOC_Os02g17550	NA	transposon protein, putative, unclassified, expressed	2	10100556	10104503	S2_10100834	G/C	2	10100834	5.58956e-05	0.23796	353	0.204667	0.242601	2.97109	TSN	Group2	Stress_Y16
LOC_Os02g17580	NA	retrotransposon protein, putative, unclassified, expressed	2	10110996	10113781	S2_10112626	C/T	2	10112626	6.55015e-05	0.229462	353	0.204667	0.241883	-2.48427	TSN	Group2	Stress_Y16
LOC_Os02g22290	NA	retrotransposon protein, putative, Ty3-gypsy subclass, expressed	2	13318073	13323010	S2_13322137	G/A	2	13322137	9.32969e-05	0.0723077	325	0.0606353	0.10647	-0.115613	PN	Group2	Stress_Y16
LOC_Os02g29160	NA	ankyrin, putative, expressed	2	17277253	17290200	S2_17280814	A/G	2	17280814	1.02603e-05	0.236434	387	0.00708178	0.0589141	-0.181208	SN	Group2	Stress_Y16
LOC_Os02g30714	NA	dehydrogenase/reductase, putative, expressed	2	18296252	18310135	S2_18307626	T/C	2	18307626	6.43099e-05	0.400383	261	0.014456	0.0777804	0.151376	SN	Group1	Stress_Y16
LOC_Os02g30714	NA	dehydrogenase/reductase, putative, expressed	2	18296252	18310135	S2_18307658	A/G	2	18307658	4.41869e-05	0.394636	261	0.014456	0.0806933	0.11795	SN	Group1	Stress_Y16
LOC_Os02g30714	NA	dehydrogenase/reductase, putative, expressed	2	18296252	18310135	S2_18307815	A/G	2	18307815	7.5852e-05	0.409962	261	0.014456	0.0765037	-0.422725	SN	Group1	Stress_Y16
LOC_Os02g30714	NA	dehydrogenase/reductase, putative, expressed	2	18296252	18310135	S2_18308016	G/C	2	18308016	6.26358e-05	0.40613	261	0.014456	0.0779847	-0.138516	SN	Group1	Stress_Y16
LOC_Os02g30714	NA	dehydrogenase/reductase, putative, expressed	2	18296252	18310135	S2_18308283	T/C	2	18308283	6.62467e-05	0.415709	261	0.014456	0.0775507	-0.126537	SN	Group1	Stress_Y16
LOC_Os02g33970	NA	retrotransposon protein, putative, Ty1-copia subclass	2	20241573	20243339	S2_20242479	A/G	2	20242479	3.63181e-06	0.133333	330	0.0572766	0.1215	5.45062	FGN	Group2	Stress_Y16
LOC_Os02g37260	NA	hypothetical protein	2	22529385	22531323	S2_22529953	C/A	2	22529953	3.39314e-05	0.0679348	184	0.0118261	0.111127	NA	PN	Group1	Stress_Y16
LOC_Os02g37260	NA	hypothetical protein	2	22529385	22531323	S2_22529958	T/C	2	22529958	3.39314e-05	0.0679348	184	0.0118261	0.111127	-1.56709	PN	Group1	Stress_Y16
LOC_Os02g37260	NA	hypothetical protein	2	22529385	22531323	S2_22529960	G/A	2	22529960	2.29673e-05	0.0652174	184	0.0118261	0.115635	-0.938404	PN	Group1	Stress_Y16
LOC_Os02g38430	NA	steroid nuclear receptor, ligand-binding, putative, expressed	2	23237153	23241425	S2_23238562	G/A	2	23238562	8.38749e-05	0.141956	317	0.046649	0.0950315	0.849012	SSR	Group2	Stress_Y16
LOC_Os02g38470	NA	B3 DNA binding domain containing protein, expressed	2	23255086	23262297	S2_23259721	T/C	2	23259721	4.77629e-05	0.132492	317	0.046649	0.098455	-3.9334	SSR	Group2	Stress_Y16
LOC_Os02g38710	NA	protein phosphatase 2C containing protein, expressed	2	23398397	23404718	S2_23402943	A/G	2	23402943	8.44732e-05	0.146688	317	0.046649	0.0949884	3.82331	SSR	Group2	Stress_Y16
LOC_Os02g43090	NA	myristoyl-acyl carrier protein thioesterase, chloroplast precursor, putative, expressed	2	25946390	25955327	S2_25950174	G/A	2	25950174	4.74199e-05	0.246305	203	0.0411146	0.124499	11.2494	TSN	Group1	Stress_Y16
LOC_Os02g49060	NA	amino acid transporter, putative, expressed	2	29991786	29998805	S2_29995913	T/C	2	29995913	9.78132e-05	0.103359	387	0.00708178	0.0472772	0.0544691	SN	Group2	Stress_Y16
LOC_Os02g49090	NA	WD domain, G-beta repeat domain containing protein, expressed	2	30015996	30025935	S2_30019859	G/A	2	30019859	9.77291e-05	0.120155	387	0.00708178	0.0472816	0.0838224	SN	Group2	Stress_Y16
LOC_Os02g49120	NA	retrotransposon protein, putative, unclassified, expressed	2	30034696	30039832	S2_30035836	G/A	2	30035836	7.81079e-05	0.0762274	387	0.00708178	0.0484261	0.0892486	SN	Group2	Stress_Y16
LOC_Os02g49160	NA	OsIAA8 - Auxin-responsive Aux/IAA gene family member, expressed	2	30064481	30066157	S2_30065044	G/T	2	30065044	7.06609e-05	0.0555556	387	0.00708178	0.0489388	0.0807891	SN	Group2	Stress_Y16
LOC_Os02g49180	NA	RNA polymerase subunit, putative, expressed	2	30067771	30071645	S2_30068354	C/T	2	30068354	7.66502e-05	0.0956072	387	0.00708178	0.0485225	0.0932585	SN	Group2	Stress_Y16
LOC_Os02g49326	NA	SET domain-containing protein, putative, expressed	2	30144260	30148692	S2_30144406	G/C	2	30144406	1.8687e-05	0.107235	387	0.00708178	0.0557945	0.0606043	SN	Group2	Stress_Y16
LOC_Os02g49390	NA	retrotransposon protein, putative, Ty3-gypsy subclass, expressed	2	30176277	30182503	S2_30179290	T/G	2	30179290	6.10181e-06	0.102067	387	0.00708178	0.061632	-0.160106	SN	Group2	Stress_Y16
LOC_Os02g49555	NA	expressed protein	2	30290562	30293723	S2_30291601	A/G	2	30291601	6.45174e-05	0.0749354	387	0.00708178	0.0494046	0.0675445	SN	Group2	Stress_Y16
LOC_Os02g49590	NA	ASC1, putative, expressed	2	30310537	30313421	S2_30311429	C/T	2	30311429	6.79771e-05	0.0581395	387	0.00708178	0.049137	-0.0543016	SN	Group2	Stress_Y16
LOC_Os02g49620	NA	expressed protein	2	30325784	30329466	S2_30329415	C/T	2	30329415	9.7425e-05	0.0555556	387	0.00708178	0.0472975	-0.0685435	SN	Group2	Stress_Y16
LOC_Os02g50550	BC3|OsDRP2B	dynamin, putative, expressed	2	30861491	30871171	S2_30862840	C/T	2	30862840	3.02315e-05	0.0568475	387	0.00708178	0.0533043	0.0823857	SN	Group2	Stress_Y16
LOC_Os02g50560	NA	DSHCT domain containing protein, expressed	2	30872771	30882871	S2_30879382	C/A	2	30879382	6.03851e-05	0.0542636	387	0.00708178	0.0497439	-0.226762	SN	Group2	Stress_Y16
LOC_Os02g50580	NA	expressed protein	2	30891298	30892010	S2_30891381	G/C	2	30891381	9.95033e-05	0.0581395	387	0.00708178	0.0471898	0.0334303	SN	Group2	Stress_Y16
LOC_Os02g50610	NA	retrotransposon protein, putative, Ty3-gypsy subclass, expressed	2	30904778	30909159	S2_30905927	T/C	2	30905927	9.2251e-05	0.0671835	387	0.00708178	0.0475759	-0.0123363	SN	Group2	Stress_Y16
LOC_Os02g50610	NA	retrotransposon protein, putative, Ty3-gypsy subclass, expressed	2	30904778	30909159	S2_30905969	G/A	2	30905969	6.08881e-06	0.0788114	387	0.00708178	0.0616432	0.00257074	SN	Group2	Stress_Y16
LOC_Os02g50610	NA	retrotransposon protein, putative, Ty3-gypsy subclass, expressed	2	30904778	30909159	S2_30909007	C/T	2	30909007	7.98002e-05	0.0594315	387	0.00708178	0.0483165	NA	SN	Group2	Stress_Y16
LOC_Os02g50610	NA	retrotransposon protein, putative, Ty3-gypsy subclass, expressed	2	30904778	30909159	S2_30909157	T/G	2	30909157	2.33237e-05	0.121447	387	0.00708178	0.0546457	-0.617544	SN	Group2	Stress_Y16
LOC_Os02g50620	NA	dehydrogenase E1 component domain containing protein, expressed	2	30918757	30922964	S2_30919871	A/G	2	30919871	5.71506e-05	0.0529716	387	0.00708178	0.0500263	0.0767501	SN	Group2	Stress_Y16
LOC_Os02g50650	NA	transposon protein, putative, CACTA, En/Spm sub-class	2	30940358	30942075	S2_30940606	T/C	2	30940606	8.22161e-05	0.310198	353	0.204667	0.240857	NA	TSN	Group2	Stress_Y16
LOC_Os02g50660	NA	transposon protein, putative, CACTA, En/Spm sub-class, expressed	2	30943536	30948223	S2_30947412	G/A	2	30947412	2.7634e-05	0.48017	353	0.204667	0.245805	-1.2091	TSN	Group2	Stress_Y16
LOC_Os02g50660	NA	transposon protein, putative, CACTA, En/Spm sub-class, expressed	2	30943536	30948223	S2_30948028	G/T	2	30948028	1.60157e-05	0.388102	353	0.204667	0.248302	4.84105	TSN	Group2	Stress_Y16
LOC_Os02g50680	NA	AAA-type ATPase family protein, putative, expressed	2	30958609	30965278	S2_30961261	G/A	2	30961261	6.22393e-05	0.385269	353	0.204667	0.242114	-0.390899	TSN	Group2	Stress_Y16
LOC_Os02g50680	NA	AAA-type ATPase family protein, putative, expressed	2	30958609	30965278	S2_30962949	G/A	2	30962949	3.21775e-05	0.376771	353	0.204667	0.245111	-2.77641	TSN	Group2	Stress_Y16
LOC_Os02g50680	NA	AAA-type ATPase family protein, putative, expressed	2	30958609	30965278	S2_30963161	A/T	2	30963161	1.68213e-05	0.373938	353	0.204667	0.248077	-0.0628427	TSN	Group2	Stress_Y16
LOC_Os02g50690	NA	GDSL-like lipase/acylhydrolase, putative, expressed	2	30965582	30967599	S2_30965691	A/T	2	30965691	3.71499e-05	0.378187	353	0.204667	0.244456	0.945149	TSN	Group2	Stress_Y16
LOC_Os02g50710	NA	expressed protein	2	30974227	30974784	S2_30974275	G/A	2	30974275	6.93025e-05	0.0594315	387	0.00708178	0.0490381	-0.0790078	SN	Group2	Stress_Y16
LOC_Os02g50710	NA	expressed protein	2	30974227	30974784	S2_30974596	C/T	2	30974596	2.4203e-05	0.412181	353	0.204667	0.24641	-2.07473	TSN	Group2	Stress_Y16
LOC_Os02g50730	OsMMP1	metalloendoproteinase 1 precursor, putative, expressed	2	30980865	30982959	S2_30981034	T/G	2	30981034	8.26975e-05	0.0503876	387	0.00708178	0.0481343	0.0493169	SN	Group2	Stress_Y16
LOC_Os02g50730	OsMMP1	metalloendoproteinase 1 precursor, putative, expressed	2	30980865	30982959	S2_30981088	C/T	2	30981088	1.59398e-05	0.373938	353	0.204667	0.248324	0.454083	TSN	Group2	Stress_Y16
LOC_Os02g50730	OsMMP1	metalloendoproteinase 1 precursor, putative, expressed	2	30980865	30982959	S2_30982788	C/T	2	30982788	2.19625e-05	0.379603	353	0.204667	0.246855	-1.8994	TSN	Group2	Stress_Y16
LOC_Os02g50760	NA	heat shock protein DnaJ, putative, expressed	2	30994374	30998999	S2_30994896	C/T	2	30994896	5.81437e-05	0.390935	353	0.204667	0.242423	14.2801	TSN	Group2	Stress_Y16
LOC_Os02g50780	NA	glycosyl hydrolase family 47 domain contain protein, expressed	2	31003959	31008703	S2_31003974	C/A	2	31003974	5.50177e-05	0.406516	353	0.204667	0.242673	0.138496	TSN	Group2	Stress_Y16
LOC_Os02g50780	NA	glycosyl hydrolase family 47 domain contain protein, expressed	2	31003959	31008703	S2_31005452	C/T	2	31005452	1.71803e-05	0.379603	353	0.204667	0.24798	1.26752	TSN	Group2	Stress_Y16
LOC_Os02g50780	NA	glycosyl hydrolase family 47 domain contain protein, expressed	2	31003959	31008703	S2_31005682	C/A	2	31005682	3.9755e-05	0.38102	353	0.204667	0.244148	-0.0136581	TSN	Group2	Stress_Y16
LOC_Os02g50780	NA	glycosyl hydrolase family 47 domain contain protein, expressed	2	31003959	31008703	S2_31005734	T/A	2	31005734	4.08342e-05	0.386686	353	0.204667	0.244026	0.323756	TSN	Group2	Stress_Y16
LOC_Os02g50780	NA	glycosyl hydrolase family 47 domain contain protein, expressed	2	31003959	31008703	S2_31006307	G/C	2	31006307	1.68827e-05	0.390935	353	0.204667	0.24806	1.83244	TSN	Group2	Stress_Y16
LOC_Os02g50790	NA	nuclear-pore anchor, putative, expressed	2	31009161	31014905	S2_31009356	T/C	2	31009356	3.65616e-05	0.395184	353	0.204667	0.244529	-7.46274	TSN	Group2	Stress_Y16
LOC_Os02g50790	NA	nuclear-pore anchor, putative, expressed	2	31009161	31014905	S2_31010249	A/T	2	31010249	3.62765e-05	0.385269	353	0.204667	0.244564	-1.70824	TSN	Group2	Stress_Y16
LOC_Os02g50790	NA	nuclear-pore anchor, putative, expressed	2	31009161	31014905	S2_31010970	T/C	2	31010970	5.85134e-05	0.383853	353	0.204667	0.242394	2.35832	TSN	Group2	Stress_Y16
LOC_Os02g50790	NA	nuclear-pore anchor, putative, expressed	2	31009161	31014905	S2_31012223	A/C	2	31012223	8.84878e-05	0.325779	353	0.204667	0.240525	-3.67661	TSN	Group2	Stress_Y16
LOC_Os02g50790	NA	nuclear-pore anchor, putative, expressed	2	31009161	31014905	S2_31013570	G/C	2	31013570	1.17868e-05	0.392351	353	0.204667	0.249711	0.160545	TSN	Group2	Stress_Y16
LOC_Os02g50790	NA	nuclear-pore anchor, putative, expressed	2	31009161	31014905	S2_31013745	G/A	2	31013745	2.80344e-05	0.383853	353	0.204667	0.245739	-0.454721	TSN	Group2	Stress_Y16
LOC_Os02g50799	NA	nuclear-pore anchor, putative, expressed	2	31023241	31033605	S2_31024503	T/C	2	31024503	5.63038e-05	0.379603	353	0.204667	0.242568	-0.455792	TSN	Group2	Stress_Y16
LOC_Os02g50799	NA	nuclear-pore anchor, putative, expressed	2	31023241	31033605	S2_31024534	G/A	2	31024534	2.4932e-05	0.38102	353	0.204667	0.246275	-0.781063	TSN	Group2	Stress_Y16
LOC_Os02g50799	NA	nuclear-pore anchor, putative, expressed	2	31023241	31033605	S2_31024549	T/C	2	31024549	1.77566e-05	0.383853	353	0.204667	0.247828	-0.196252	TSN	Group2	Stress_Y16
LOC_Os02g50799	NA	nuclear-pore anchor, putative, expressed	2	31023241	31033605	S2_31025084	A/G	2	31025084	2.56093e-05	0.385269	353	0.204667	0.246152	-0.321386	TSN	Group2	Stress_Y16
LOC_Os02g50799	NA	nuclear-pore anchor, putative, expressed	2	31023241	31033605	S2_31025303	A/G	2	31025303	8.17559e-05	0.320113	353	0.204667	0.240882	0.399139	TSN	Group2	Stress_Y16
LOC_Os02g50799	NA	nuclear-pore anchor, putative, expressed	2	31023241	31033605	S2_31025434	A/T	2	31025434	3.59542e-05	0.398017	353	0.204667	0.244605	0.162403	TSN	Group2	Stress_Y16
LOC_Os02g50799	NA	nuclear-pore anchor, putative, expressed	2	31023241	31033605	S2_31026565	T/C	2	31026565	1.2268e-05	0.386686	353	0.204667	0.249527	-0.488311	TSN	Group2	Stress_Y16
LOC_Os02g50799	NA	nuclear-pore anchor, putative, expressed	2	31023241	31033605	S2_31026889	T/G	2	31026889	4.76176e-05	0.38102	353	0.204667	0.243328	-0.0664985	TSN	Group2	Stress_Y16
LOC_Os02g50799	NA	nuclear-pore anchor, putative, expressed	2	31023241	31033605	S2_31027616	A/C	2	31027616	9.20255e-05	0.372521	353	0.204667	0.240349	0.506653	TSN	Group2	Stress_Y16
LOC_Os02g50799	NA	nuclear-pore anchor, putative, expressed	2	31023241	31033605	S2_31030113	C/T	2	31030113	6.39933e-06	0.393768	353	0.204667	0.252531	0.506528	TSN	Group2	Stress_Y16
LOC_Os02g50799	NA	nuclear-pore anchor, putative, expressed	2	31023241	31033605	S2_31030490	A/G	2	31030490	1.93452e-05	0.393768	353	0.204667	0.247436	-0.0662252	TSN	Group2	Stress_Y16
LOC_Os02g50799	NA	nuclear-pore anchor, putative, expressed	2	31023241	31033605	S2_31031430	A/G	2	31031430	4.44902e-05	0.383853	353	0.204667	0.243636	0.809159	TSN	Group2	Stress_Y16
LOC_Os02g50799	NA	nuclear-pore anchor, putative, expressed	2	31023241	31033605	S2_31032028	A/G	2	31032028	2.28008e-05	0.382436	353	0.204667	0.246683	-0.526995	TSN	Group2	Stress_Y16
LOC_Os02g50799	NA	nuclear-pore anchor, putative, expressed	2	31023241	31033605	S2_31032494	T/C	2	31032494	1.31793e-05	0.378187	353	0.204667	0.249197	-0.440683	TSN	Group2	Stress_Y16
LOC_Os02g50810	NA	expressed protein	2	31038501	31040540	S2_31039509	T/C	2	31039509	1.87994e-05	0.389518	353	0.204667	0.247567	0.952532	TSN	Group2	Stress_Y16
LOC_Os02g50830	NA	expressed protein	2	31054852	31059281	S2_31056081	T/C	2	31056081	9.98394e-05	0.38102	353	0.204667	0.239982	-12.4125	TSN	Group2	Stress_Y16
LOC_Os02g50830	NA	expressed protein	2	31054852	31059281	S2_31057626	T/C	2	31057626	4.37177e-06	0.373938	353	0.204667	0.254299	0.668181	TSN	Group2	Stress_Y16
LOC_Os02g50840	NA	BAH domain containing protein, putative, expressed	2	31064064	31071265	S2_31065456	G/A	2	31065456	1.17316e-05	0.373938	353	0.204667	0.249733	0.673233	TSN	Group2	Stress_Y16
LOC_Os02g50850	NA	BAH domain containing protein, putative, expressed	2	31078543	31083937	S2_31079411	G/A	2	31079411	5.85848e-05	0.379603	353	0.204667	0.242388	0.282925	TSN	Group2	Stress_Y16
LOC_Os02g50850	NA	BAH domain containing protein, putative, expressed	2	31078543	31083937	S2_31082760	A/G	2	31082760	1.37708e-05	0.376771	353	0.204667	0.248995	2.52714	TSN	Group2	Stress_Y16
LOC_Os02g50860	NA	ras-related protein, putative, expressed	2	31084424	31088184	S2_31085216	G/A	2	31085216	2.44837e-05	0.373938	353	0.204667	0.246358	0.389347	TSN	Group2	Stress_Y16
LOC_Os02g50870	NA	expressed protein	2	31089308	31093641	S2_31091982	T/A	2	31091982	7.88655e-05	0.332861	353	0.204667	0.241045	0.0893595	TSN	Group2	Stress_Y16
LOC_Os02g50870	NA	expressed protein	2	31089308	31093641	S2_31092372	T/C	2	31092372	3.33989e-05	0.382436	353	0.204667	0.244941	0.166447	TSN	Group2	Stress_Y16
LOC_Os02g50870	NA	expressed protein	2	31089308	31093641	S2_31092380	T/C	2	31092380	8.69383e-05	0.382436	353	0.204667	0.240605	-22.3866	TSN	Group2	Stress_Y16
LOC_Os02g50870	NA	expressed protein	2	31089308	31093641	S2_31092433	T/C	2	31092433	2.19209e-05	0.373938	353	0.204667	0.246863	-0.31548	TSN	Group2	Stress_Y16
LOC_Os02g50870	NA	expressed protein	2	31089308	31093641	S2_31093629	T/C	2	31093629	3.83443e-05	0.389518	353	0.204667	0.244312	-0.594688	TSN	Group2	Stress_Y16
LOC_Os02g50880	NA	OsDegp3 - Putative Deg protease homologue, expressed	2	31096163	31101189	S2_31097097	T/C	2	31097097	4.10839e-05	0.38102	353	0.204667	0.243998	-1.15283	TSN	Group2	Stress_Y16
LOC_Os02g50880	NA	OsDegp3 - Putative Deg protease homologue, expressed	2	31096163	31101189	S2_31098604	A/G	2	31098604	5.38657e-05	0.389518	353	0.204667	0.242769	0.0754245	TSN	Group2	Stress_Y16
LOC_Os02g50880	NA	OsDegp3 - Putative Deg protease homologue, expressed	2	31096163	31101189	S2_31099469	T/C	2	31099469	1.62279e-05	0.390935	353	0.204667	0.248241	-0.956581	TSN	Group2	Stress_Y16
LOC_Os02g50890	NA	hypothetical protein	2	31106227	31106462	S2_31106308	A/G	2	31106308	4.54253e-05	0.368272	353	0.204667	0.243542	-0.107581	TSN	Group2	Stress_Y16
LOC_Os02g50900	NA	expressed protein	2	31111840	31114614	S2_31113784	C/T	2	31113784	1.56054e-05	0.386686	353	0.204667	0.248421	0.587255	TSN	Group2	Stress_Y16
LOC_Os02g50910	NA	expressed protein	2	31120608	31124019	S2_31123813	G/A	2	31123813	1.66381e-05	0.382436	353	0.204667	0.248127	13.5799	TSN	Group2	Stress_Y16
LOC_Os02g50950	NA	expressed protein	2	31150338	31151860	S2_31150941	C/T	2	31150941	4.00152e-05	0.393768	353	0.204667	0.244118	0.985264	TSN	Group2	Stress_Y16
LOC_Os02g50950	NA	expressed protein	2	31150338	31151860	S2_31150971	G/A	2	31150971	5.46883e-05	0.345609	353	0.204667	0.2427	-1.98767	TSN	Group2	Stress_Y16
LOC_Os02g50950	NA	expressed protein	2	31150338	31151860	S2_31150986	A/G	2	31150986	2.64284e-05	0.389518	353	0.204667	0.246008	1.82147	TSN	Group2	Stress_Y16
LOC_Os02g50950	NA	expressed protein	2	31150338	31151860	S2_31150989	A/G	2	31150989	2.24307e-05	0.389518	353	0.204667	0.246758	-2.20223	TSN	Group2	Stress_Y16
LOC_Os02g50960	OsPIN1|REH1|PIN1b	auxin efflux carrier component, putative, expressed	2	31158903	31162062	S2_31161310	A/G	2	31161310	5.29388e-06	0.390935	353	0.204667	0.25341	-4.55403	TSN	Group2	Stress_Y16
LOC_Os02g50960	OsPIN1|REH1|PIN1b	auxin efflux carrier component, putative, expressed	2	31158903	31162062	S2_31162025	A/G	2	31162025	7.623e-06	0.388102	353	0.204667	0.251722	-1.04061	TSN	Group2	Stress_Y16
LOC_Os02g50970	DSM1	protein kinase domain containing protein, expressed	2	31171936	31180182	S2_31178528	G/C	2	31178528	5.95584e-05	0.351275	353	0.204667	0.242314	-2.30268	TSN	Group2	Stress_Y16
LOC_Os02g50990	NA	RING-H2 finger protein ATL1Q, putative, expressed	2	31190742	31195241	S2_31190783	G/A	2	31190783	2.193e-05	0.32153	353	0.204667	0.246861	0.0842642	TSN	Group2	Stress_Y16
LOC_Os02g51770	NA	TLD family protein, putative, expressed	2	31707658	31710991	S2_31708687	T/G	2	31708687	2.52845e-05	0.27762	353	0.204667	0.246211	1.74232	TSN	Group2	Stress_Y16
LOC_Os02g51780	NA	ribonuclease protein, putative, expressed	2	31711352	31716394	S2_31715582	G/A	2	31715582	4.78225e-05	0.274788	353	0.204667	0.243308	-1.4455	TSN	Group2	Stress_Y16
LOC_Os02g51790	NA	ribosomal protein L29, putative, expressed	2	31719721	31722499	S2_31720375	G/A	2	31720375	1.19565e-05	0.276204	353	0.204667	0.249645	-1.50736	TSN	Group2	Stress_Y16
LOC_Os02g51799	NA	MYB family transcription factor, putative, expressed	2	31724820	31726321	S2_31725636	A/G	2	31725636	2.85201e-05	0.276204	353	0.204667	0.245661	0.773795	TSN	Group2	Stress_Y16
LOC_Os02g51810	NA	expressed protein	2	31739493	31747386	S2_31742056	A/C	2	31742056	2.61189e-05	0.279037	353	0.204667	0.246062	1.08636	TSN	Group2	Stress_Y16
LOC_Os02g51830	NA	tRNA synthetase class II core domain containing protein, expressed	2	31748768	31754456	S2_31750823	A/T	2	31750823	9.51627e-05	0.280453	353	0.204667	0.240198	-1.28462	TSN	Group2	Stress_Y16
LOC_Os02g51830	NA	tRNA synthetase class II core domain containing protein, expressed	2	31748768	31754456	S2_31752526	T/C	2	31752526	6.70239e-05	0.28187	353	0.204667	0.241779	1.00683	TSN	Group2	Stress_Y16
LOC_Os02g51830	NA	tRNA synthetase class II core domain containing protein, expressed	2	31748768	31754456	S2_31753732	A/G	2	31753732	5.98376e-05	0.276204	353	0.204667	0.242293	0.0428551	TSN	Group2	Stress_Y16
LOC_Os02g51880	NA	amine oxidase, putative, expressed	2	31773341	31776421	S2_31773877	C/T	2	31773877	2.26008e-05	0.276204	353	0.204667	0.246724	-0.657408	TSN	Group2	Stress_Y16
LOC_Os02g51890	NA	RNA recognition motif containing protein, putative, expressed	2	31781325	31787892	S2_31784040	G/A	2	31784040	2.82163e-05	0.279037	353	0.204667	0.24571	-0.746559	TSN	Group2	Stress_Y16
LOC_Os02g51890	NA	RNA recognition motif containing protein, putative, expressed	2	31781325	31787892	S2_31784668	T/G	2	31784668	7.79714e-05	0.273371	353	0.204667	0.241096	-0.732673	TSN	Group2	Stress_Y16
LOC_Os02g51890	NA	RNA recognition motif containing protein, putative, expressed	2	31781325	31787892	S2_31785043	T/C	2	31785043	5.32429e-05	0.273371	353	0.204667	0.242822	-1.03271	TSN	Group2	Stress_Y16
LOC_Os02g51900	NA	cytokinin-O-glucosyltransferase 2, putative, expressed	2	31786801	31789031	S2_31786923	T/C	2	31786923	2.08607e-05	0.279037	353	0.204667	0.24709	0.359996	TSN	Group2	Stress_Y16
LOC_Os02g51900	NA	cytokinin-O-glucosyltransferase 2, putative, expressed	2	31786801	31789031	S2_31787301	A/G	2	31787301	1.76024e-05	0.27762	353	0.204667	0.247868	1.13051	TSN	Group2	Stress_Y16
LOC_Os02g51900	NA	cytokinin-O-glucosyltransferase 2, putative, expressed	2	31786801	31789031	S2_31787766	T/C	2	31787766	2.26401e-05	0.279037	353	0.204667	0.246716	0.892111	TSN	Group2	Stress_Y16
LOC_Os02g51910	NA	cytokinin-O-glucosyltransferase 2, putative, expressed	2	31791009	31793891	S2_31791507	T/C	2	31791507	5.58572e-06	0.280453	353	0.204667	0.253161	-3.22242	TSN	Group2	Stress_Y16
LOC_Os02g51910	NA	cytokinin-O-glucosyltransferase 2, putative, expressed	2	31791009	31793891	S2_31791549	G/A	2	31791549	1.05134e-05	0.279037	353	0.204667	0.250238	2.01025	TSN	Group2	Stress_Y16
LOC_Os02g51910	NA	cytokinin-O-glucosyltransferase 2, putative, expressed	2	31791009	31793891	S2_31791567	G/T	2	31791567	4.73597e-05	0.290368	353	0.204667	0.243353	-5.39645	TSN	Group2	Stress_Y16
LOC_Os02g51910	NA	cytokinin-O-glucosyltransferase 2, putative, expressed	2	31791009	31793891	S2_31791568	T/A	2	31791568	5.10762e-05	0.293201	353	0.204667	0.24301	0.120751	TSN	Group2	Stress_Y16
LOC_Os02g51910	NA	cytokinin-O-glucosyltransferase 2, putative, expressed	2	31791009	31793891	S2_31791569	A/G	2	31791569	6.60796e-05	0.291785	353	0.204667	0.241844	2.36541	TSN	Group2	Stress_Y16
LOC_Os02g51910	NA	cytokinin-O-glucosyltransferase 2, putative, expressed	2	31791009	31793891	S2_31791574	G/C	2	31791574	8.46384e-05	0.288952	353	0.204667	0.240726	0.565302	TSN	Group2	Stress_Y16
LOC_Os02g51910	NA	cytokinin-O-glucosyltransferase 2, putative, expressed	2	31791009	31793891	S2_31791575	T/A	2	31791575	8.46384e-05	0.288952	353	0.204667	0.240726	-0.56014	TSN	Group2	Stress_Y16
LOC_Os02g51910	NA	cytokinin-O-glucosyltransferase 2, putative, expressed	2	31791009	31793891	S2_31791620	C/T	2	31791620	3.32805e-05	0.27762	353	0.204667	0.244957	-1.01389	TSN	Group2	Stress_Y16
LOC_Os02g51910	NA	cytokinin-O-glucosyltransferase 2, putative, expressed	2	31791009	31793891	S2_31791712	T/C	2	31791712	7.08414e-05	0.284703	353	0.204667	0.241529	0.914391	TSN	Group2	Stress_Y16
LOC_Os02g51910	NA	cytokinin-O-glucosyltransferase 2, putative, expressed	2	31791009	31793891	S2_31793157	A/G	2	31793157	2.20638e-05	0.273371	353	0.204667	0.246834	-0.995954	TSN	Group2	Stress_Y16
LOC_Os02g51910	NA	cytokinin-O-glucosyltransferase 2, putative, expressed	2	31791009	31793891	S2_31793609	T/C	2	31793609	7.43208e-05	0.279037	353	0.204667	0.241312	-0.505337	TSN	Group2	Stress_Y16
LOC_Os02g51910	NA	cytokinin-O-glucosyltransferase 2, putative, expressed	2	31791009	31793891	S2_31793688	T/C	2	31793688	2.02239e-05	0.276204	353	0.204667	0.247232	1.5112	TSN	Group2	Stress_Y16
LOC_Os02g51910	NA	cytokinin-O-glucosyltransferase 2, putative, expressed	2	31791009	31793891	S2_31793871	T/C	2	31793871	6.93243e-05	0.270538	353	0.204667	0.241627	0.0571209	TSN	Group2	Stress_Y16
LOC_Os02g51960	NA	transposon protein, putative, unclassified, expressed	2	31818498	31821865	S2_31818641	G/C	2	31818641	9.50335e-05	0.232295	353	0.204667	0.240204	NA	TSN	Group2	Stress_Y16
LOC_Os02g51960	NA	transposon protein, putative, unclassified, expressed	2	31818498	31821865	S2_31819265	A/T	2	31819265	2.26551e-05	0.300283	353	0.204667	0.246713	-0.247024	TSN	Group2	Stress_Y16
LOC_Os02g52000	NA	phosphate-induced protein 1 conserved region domain containing protein, expressed	2	31834808	31836353	S2_31834910	G/A	2	31834910	7.56564e-05	0.269122	353	0.204667	0.241232	0.647471	TSN	Group2	Stress_Y16
LOC_Os02g52000	NA	phosphate-induced protein 1 conserved region domain containing protein, expressed	2	31834808	31836353	S2_31834947	T/G	2	31834947	5.06499e-05	0.26204	353	0.204667	0.243048	0.0463066	TSN	Group2	Stress_Y16
LOC_Os02g52010	NA	phosphate-induced protein 1 conserved region domain containing protein, expressed	2	31840427	31841847	S2_31840514	T/C	2	31840514	6.57896e-05	0.266289	353	0.204667	0.241863	0.72657	TSN	Group2	Stress_Y16
LOC_Os02g52020	NA	retrotransposon protein, putative, Ty1-copia subclass, expressed	2	31842860	31846978	S2_31846920	T/A	2	31846920	7.96241e-05	0.364023	353	0.204667	0.241001	-1.01797	TSN	Group2	Stress_Y16
LOC_Os02g52040	OsPHI-1	phosphate-induced protein 1 conserved region domain containing protein, expressed	2	31851356	31852646	S2_31851593	A/C	2	31851593	3.68623e-05	0.267705	353	0.204667	0.244491	-0.109633	TSN	Group2	Stress_Y16
LOC_Os02g52060	NA	peptide transporter like protein, putative, expressed	2	31864920	31865884	S2_31865037	A/G	2	31865037	4.55629e-05	0.274788	353	0.204667	0.243528	1.40389	TSN	Group2	Stress_Y16
LOC_Os02g52220	NA	PPR repeat domain containing protein, putative, expressed	2	31975598	31978222	S2_31976166	G/A	2	31976166	2.50397e-05	0.25779	353	0.204667	0.246255	-1.04517	TSN	Group2	Stress_Y16
LOC_Os02g52290	NA	peptidyl-prolyl cis-trans isomerase, FKBP-type, putative, expressed	2	32017733	32019895	S2_32018365	A/G	2	32018365	8.00952e-05	0.264873	353	0.204667	0.240975	-1.45232	TSN	Group2	Stress_Y16
LOC_Os02g52340	OsMADS22	OsMADS22 - MADS-box family gene with MIKCc type-box, expressed	2	32038902	32045130	S2_32042461	C/T	2	32042461	6.03593e-05	0.269122	353	0.204667	0.242253	-0.00981912	TSN	Group2	Stress_Y16
LOC_Os02g52350	NA	expressed protein	2	32046208	32047210	S2_32046312	G/T	2	32046312	2.26082e-05	0.267705	353	0.204667	0.246722	-0.490933	TSN	Group2	Stress_Y16
LOC_Os02g52360	NA	peptidyl-prolyl cis-trans isomerase CYP40, putative, expressed	2	32047766	32052325	S2_32048351	C/T	2	32048351	8.78727e-05	0.267705	353	0.204667	0.240557	1.74639	TSN	Group2	Stress_Y16
LOC_Os02g52390	NA	M16 domain containing zinc peptidase, putative, expressed	2	32062238	32070456	S2_32062828	C/G	2	32062828	2.9729e-05	0.270538	353	0.204667	0.245471	2.04291	TSN	Group2	Stress_Y16
LOC_Os02g52390	NA	M16 domain containing zinc peptidase, putative, expressed	2	32062238	32070456	S2_32066171	C/T	2	32066171	2.77708e-06	0.270538	353	0.204667	0.256412	-1.59684	TSN	Group2	Stress_Y16
LOC_Os02g52390	NA	M16 domain containing zinc peptidase, putative, expressed	2	32062238	32070456	S2_32066845	A/G	2	32066845	6.99126e-05	0.273371	353	0.204667	0.241589	1.98956	TSN	Group2	Stress_Y16
LOC_Os02g52410	NA	expressed protein	2	32071208	32080488	S2_32073583	T/G	2	32073583	9.68409e-05	0.28187	353	0.204667	0.240119	1.9707	TSN	Group2	Stress_Y16
LOC_Os02g52410	NA	expressed protein	2	32071208	32080488	S2_32073631	T/C	2	32073631	5.45386e-05	0.269122	353	0.204667	0.242713	-0.640138	TSN	Group2	Stress_Y16
LOC_Os02g52410	NA	expressed protein	2	32071208	32080488	S2_32075185	A/G	2	32075185	8.74897e-05	0.260623	353	0.204667	0.240576	0.196456	TSN	Group2	Stress_Y16
LOC_Os02g52410	NA	expressed protein	2	32071208	32080488	S2_32075506	T/G	2	32075506	7.70587e-05	0.144476	353	0.204667	0.241149	2.50411	TSN	Group2	Stress_Y16
LOC_Os02g52410	NA	expressed protein	2	32071208	32080488	S2_32076981	A/G	2	32076981	6.93872e-05	0.29745	353	0.204667	0.241623	1.90523	TSN	Group2	Stress_Y16
LOC_Os02g52420	NA	peptidase, M24 family protein, putative, expressed	2	32081282	32085569	S2_32083255	G/A	2	32083255	2.24374e-05	0.271955	353	0.204667	0.246757	-1.46826	TSN	Group2	Stress_Y16
LOC_Os02g52430	NA	regulator of ribonuclease, putative, expressed	2	32088082	32090304	S2_32090083	T/A	2	32090083	2.00611e-05	0.286119	353	0.204667	0.247269	1.22407	TSN	Group2	Stress_Y16
LOC_Os02g52430	NA	regulator of ribonuclease, putative, expressed	2	32088082	32090304	S2_32090249	A/G	2	32090249	7.50749e-05	0.290368	353	0.204667	0.241267	2.1879	TSN	Group2	Stress_Y16
LOC_Os02g52430	NA	regulator of ribonuclease, putative, expressed	2	32088082	32090304	S2_32090270	G/A	2	32090270	5.12524e-05	0.290368	353	0.204667	0.242994	0.815859	TSN	Group2	Stress_Y16
LOC_Os02g52430	NA	regulator of ribonuclease, putative, expressed	2	32088082	32090304	S2_32090300	T/G	2	32090300	6.18797e-05	0.304533	353	0.204667	0.242141	-1.23307	TSN	Group2	Stress_Y16
LOC_Os02g52440	NA	hypothetical protein	2	32091515	32091955	S2_32091674	A/G	2	32091674	2.31588e-05	0.273371	353	0.204667	0.246612	1.4062	TSN	Group2	Stress_Y16
LOC_Os02g52440	NA	hypothetical protein	2	32091515	32091955	S2_32091679	G/A	2	32091679	2.31588e-05	0.273371	353	0.204667	0.246612	-2.54236	TSN	Group2	Stress_Y16
LOC_Os02g52440	NA	hypothetical protein	2	32091515	32091955	S2_32091707	C/T	2	32091707	7.72077e-06	0.273371	353	0.204667	0.251663	-1.0467	TSN	Group2	Stress_Y16
LOC_Os02g52440	NA	hypothetical protein	2	32091515	32091955	S2_32091726	G/A	2	32091726	7.53421e-05	0.271955	353	0.204667	0.241251	-0.71071	TSN	Group2	Stress_Y16
LOC_Os02g52440	NA	hypothetical protein	2	32091515	32091955	S2_32091727	A/G	2	32091727	9.12481e-05	0.273371	353	0.204667	0.240387	-1.66016	TSN	Group2	Stress_Y16
LOC_Os02g52440	NA	hypothetical protein	2	32091515	32091955	S2_32091820	G/A	2	32091820	2.90044e-05	0.267705	353	0.204667	0.245584	1.49078	TSN	Group2	Stress_Y16
LOC_Os02g52440	NA	hypothetical protein	2	32091515	32091955	S2_32091850	A/G	2	32091850	1.89498e-05	0.269122	353	0.204667	0.24753	0.869298	TSN	Group2	Stress_Y16
LOC_Os02g52440	NA	hypothetical protein	2	32091515	32091955	S2_32091879	T/C	2	32091879	1.74231e-05	0.269122	353	0.204667	0.247915	0.843845	TSN	Group2	Stress_Y16
LOC_Os02g52450	NA	regulator of ribonuclease, putative, expressed	2	32092648	32094809	S2_32092772	T/A	2	32092772	7.50209e-05	0.280453	353	0.204667	0.24127	-1.45628	TSN	Group2	Stress_Y16
LOC_Os02g52450	NA	regulator of ribonuclease, putative, expressed	2	32092648	32094809	S2_32092875	A/G	2	32092875	1.15112e-05	0.269122	353	0.204667	0.24982	-2.7925	TSN	Group2	Stress_Y16
LOC_Os02g52450	NA	regulator of ribonuclease, putative, expressed	2	32092648	32094809	S2_32092919	G/A	2	32092919	1.35333e-05	0.266289	353	0.204667	0.249075	-2.19051	TSN	Group2	Stress_Y16
LOC_Os02g52450	NA	regulator of ribonuclease, putative, expressed	2	32092648	32094809	S2_32093024	G/A	2	32093024	5.28304e-05	0.273371	353	0.204667	0.242857	-0.374337	TSN	Group2	Stress_Y16
LOC_Os02g52450	NA	regulator of ribonuclease, putative, expressed	2	32092648	32094809	S2_32093195	G/T	2	32093195	1.52579e-05	0.267705	353	0.204667	0.248524	1.17266	TSN	Group2	Stress_Y16
LOC_Os02g52450	NA	regulator of ribonuclease, putative, expressed	2	32092648	32094809	S2_32093517	T/G	2	32093517	2.28849e-05	0.269122	353	0.204667	0.246666	-2.17417	TSN	Group2	Stress_Y16
LOC_Os02g52450	NA	regulator of ribonuclease, putative, expressed	2	32092648	32094809	S2_32093785	T/C	2	32093785	8.7655e-05	0.290368	353	0.204667	0.240568	-0.688872	TSN	Group2	Stress_Y16
LOC_Os02g52450	NA	regulator of ribonuclease, putative, expressed	2	32092648	32094809	S2_32093801	A/G	2	32093801	6.26145e-05	0.293201	353	0.204667	0.242087	-2.39158	TSN	Group2	Stress_Y16
LOC_Os02g52450	NA	regulator of ribonuclease, putative, expressed	2	32092648	32094809	S2_32093914	C/T	2	32093914	5.3751e-05	0.27762	353	0.204667	0.242778	0.374846	TSN	Group2	Stress_Y16
LOC_Os02g52450	NA	regulator of ribonuclease, putative, expressed	2	32092648	32094809	S2_32093935	T/A	2	32093935	3.30242e-05	0.274788	353	0.204667	0.244992	0.750828	TSN	Group2	Stress_Y16
LOC_Os02g52450	NA	regulator of ribonuclease, putative, expressed	2	32092648	32094809	S2_32093965	A/G	2	32093965	6.61648e-05	0.271955	353	0.204667	0.241838	-1.10723	TSN	Group2	Stress_Y16
LOC_Os02g52450	NA	regulator of ribonuclease, putative, expressed	2	32092648	32094809	S2_32093971	G/A	2	32093971	5.00044e-05	0.271955	353	0.204667	0.243106	2.90691	TSN	Group2	Stress_Y16
LOC_Os02g52450	NA	regulator of ribonuclease, putative, expressed	2	32092648	32094809	S2_32094007	A/G	2	32094007	8.40863e-05	0.274788	353	0.204667	0.240755	0.582382	TSN	Group2	Stress_Y16
LOC_Os02g52450	NA	regulator of ribonuclease, putative, expressed	2	32092648	32094809	S2_32094267	G/C	2	32094267	5.79921e-05	0.270538	353	0.204667	0.242434	-1.0224	TSN	Group2	Stress_Y16
LOC_Os02g52450	NA	regulator of ribonuclease, putative, expressed	2	32092648	32094809	S2_32094328	C/A	2	32094328	2.05487e-05	0.287535	353	0.204667	0.247159	0.471278	TSN	Group2	Stress_Y16
LOC_Os02g52450	NA	regulator of ribonuclease, putative, expressed	2	32092648	32094809	S2_32094496	G/A	2	32094496	8.6034e-05	0.279037	353	0.204667	0.240652	1.39911	TSN	Group2	Stress_Y16
LOC_Os02g52450	NA	regulator of ribonuclease, putative, expressed	2	32092648	32094809	S2_32094525	C/A	2	32094525	7.3412e-05	0.269122	353	0.204667	0.241368	0.479367	TSN	Group2	Stress_Y16
LOC_Os02g52450	NA	regulator of ribonuclease, putative, expressed	2	32092648	32094809	S2_32094527	G/A	2	32094527	7.3412e-05	0.269122	353	0.204667	0.241368	1.1541	TSN	Group2	Stress_Y16
LOC_Os02g52450	NA	regulator of ribonuclease, putative, expressed	2	32092648	32094809	S2_32094557	G/C	2	32094557	5.73013e-05	0.269122	353	0.204667	0.242489	-0.810352	TSN	Group2	Stress_Y16
LOC_Os02g52450	NA	regulator of ribonuclease, putative, expressed	2	32092648	32094809	S2_32094562	G/A	2	32094562	7.70771e-05	0.273371	353	0.204667	0.241148	0.713492	TSN	Group2	Stress_Y16
LOC_Os02g52450	NA	regulator of ribonuclease, putative, expressed	2	32092648	32094809	S2_32094587	G/A	2	32094587	7.33824e-05	0.271955	353	0.204667	0.24137	-1.43474	TSN	Group2	Stress_Y16
LOC_Os02g52450	NA	regulator of ribonuclease, putative, expressed	2	32092648	32094809	S2_32094596	C/T	2	32094596	6.36919e-05	0.273371	353	0.204667	0.24201	1.51601	TSN	Group2	Stress_Y16
LOC_Os02g52450	NA	regulator of ribonuclease, putative, expressed	2	32092648	32094809	S2_32094609	G/A	2	32094609	3.75486e-05	0.27762	353	0.204667	0.244408	0.760431	TSN	Group2	Stress_Y16
LOC_Os02g52450	NA	regulator of ribonuclease, putative, expressed	2	32092648	32094809	S2_32094628	C/T	2	32094628	6.60424e-05	0.273371	353	0.204667	0.241846	1.28946	TSN	Group2	Stress_Y16
LOC_Os02g52450	NA	regulator of ribonuclease, putative, expressed	2	32092648	32094809	S2_32094649	G/A	2	32094649	3.47045e-05	0.276204	353	0.204667	0.244766	-1.26016	TSN	Group2	Stress_Y16
LOC_Os02g52450	NA	regulator of ribonuclease, putative, expressed	2	32092648	32094809	S2_32094651	C/A	2	32094651	1.91637e-05	0.274788	353	0.204667	0.247479	1.14743	TSN	Group2	Stress_Y16
LOC_Os02g52450	NA	regulator of ribonuclease, putative, expressed	2	32092648	32094809	S2_32094721	T/C	2	32094721	3.07791e-05	0.283286	353	0.204667	0.245313	0.728126	TSN	Group2	Stress_Y16
LOC_Os02g52450	NA	regulator of ribonuclease, putative, expressed	2	32092648	32094809	S2_32094763	T/C	2	32094763	1.43667e-05	0.27762	353	0.204667	0.248801	0.720936	TSN	Group2	Stress_Y16
LOC_Os02g52460	NA	zinc knuckle domain containing protein, expressed	2	32095322	32098710	S2_32095383	G/A	2	32095383	3.68375e-05	0.270538	353	0.204667	0.244495	2.15742	TSN	Group2	Stress_Y16
LOC_Os02g52460	NA	zinc knuckle domain containing protein, expressed	2	32095322	32098710	S2_32095390	A/T	2	32095390	8.0948e-06	0.269122	353	0.204667	0.251444	-0.680538	TSN	Group2	Stress_Y16
LOC_Os02g52460	NA	zinc knuckle domain containing protein, expressed	2	32095322	32098710	S2_32095421	G/C	2	32095421	3.09351e-05	0.273371	353	0.204667	0.24529	2.74568	TSN	Group2	Stress_Y16
LOC_Os02g52460	NA	zinc knuckle domain containing protein, expressed	2	32095322	32098710	S2_32095660	A/G	2	32095660	1.59561e-05	0.269122	353	0.204667	0.248319	0.420253	TSN	Group2	Stress_Y16
LOC_Os02g52460	NA	zinc knuckle domain containing protein, expressed	2	32095322	32098710	S2_32095689	C/G	2	32095689	7.77207e-06	0.270538	353	0.204667	0.251632	-0.64196	TSN	Group2	Stress_Y16
LOC_Os02g52460	NA	zinc knuckle domain containing protein, expressed	2	32095322	32098710	S2_32095773	T/C	2	32095773	2.20389e-05	0.274788	353	0.204667	0.246839	1.18904	TSN	Group2	Stress_Y16
LOC_Os02g52460	NA	zinc knuckle domain containing protein, expressed	2	32095322	32098710	S2_32095781	G/C	2	32095781	8.26273e-05	0.271955	353	0.204667	0.240834	-0.330982	TSN	Group2	Stress_Y16
LOC_Os02g52460	NA	zinc knuckle domain containing protein, expressed	2	32095322	32098710	S2_32095808	T/C	2	32095808	4.79012e-05	0.279037	353	0.204667	0.243301	0.770452	TSN	Group2	Stress_Y16
LOC_Os02g52460	NA	zinc knuckle domain containing protein, expressed	2	32095322	32098710	S2_32095820	C/T	2	32095820	5.17409e-05	0.279037	353	0.204667	0.242951	-1.76689	TSN	Group2	Stress_Y16
LOC_Os02g52460	NA	zinc knuckle domain containing protein, expressed	2	32095322	32098710	S2_32096138	A/G	2	32096138	5.42001e-05	0.269122	353	0.204667	0.242741	-0.509145	TSN	Group2	Stress_Y16
LOC_Os02g52460	NA	zinc knuckle domain containing protein, expressed	2	32095322	32098710	S2_32096173	T/C	2	32096173	5.33881e-05	0.279037	353	0.204667	0.242809	-1.47705	TSN	Group2	Stress_Y16
LOC_Os02g52460	NA	zinc knuckle domain containing protein, expressed	2	32095322	32098710	S2_32096258	T/C	2	32096258	8.88467e-05	0.27762	353	0.204667	0.240507	1.80994	TSN	Group2	Stress_Y16
LOC_Os02g52460	NA	zinc knuckle domain containing protein, expressed	2	32095322	32098710	S2_32096285	A/C	2	32096285	8.88511e-05	0.279037	353	0.204667	0.240507	2.14741	TSN	Group2	Stress_Y16
LOC_Os02g52460	NA	zinc knuckle domain containing protein, expressed	2	32095322	32098710	S2_32096338	G/A	2	32096338	6.91071e-05	0.276204	353	0.204667	0.241641	-2.689	TSN	Group2	Stress_Y16
LOC_Os02g52460	NA	zinc knuckle domain containing protein, expressed	2	32095322	32098710	S2_32096479	A/T	2	32096479	7.82201e-05	0.279037	353	0.204667	0.241082	-3.66842	TSN	Group2	Stress_Y16
LOC_Os02g52460	NA	zinc knuckle domain containing protein, expressed	2	32095322	32098710	S2_32096582	A/G	2	32096582	7.57609e-05	0.283286	353	0.204667	0.241226	-2.15497	TSN	Group2	Stress_Y16
LOC_Os02g52460	NA	zinc knuckle domain containing protein, expressed	2	32095322	32098710	S2_32096595	C/A	2	32096595	3.67006e-05	0.284703	353	0.204667	0.244511	2.31506	TSN	Group2	Stress_Y16
LOC_Os02g52460	NA	zinc knuckle domain containing protein, expressed	2	32095322	32098710	S2_32096613	A/G	2	32096613	3.68396e-05	0.279037	353	0.204667	0.244494	-3.4854	TSN	Group2	Stress_Y16
LOC_Os02g52460	NA	zinc knuckle domain containing protein, expressed	2	32095322	32098710	S2_32096659	T/A	2	32096659	8.37812e-05	0.273371	353	0.204667	0.240772	2.43534	TSN	Group2	Stress_Y16
LOC_Os02g52460	NA	zinc knuckle domain containing protein, expressed	2	32095322	32098710	S2_32096764	C/T	2	32096764	9.37366e-05	0.279037	353	0.204667	0.240266	-2.10092	TSN	Group2	Stress_Y16
LOC_Os02g52460	NA	zinc knuckle domain containing protein, expressed	2	32095322	32098710	S2_32096826	G/A	2	32096826	6.30191e-05	0.27762	353	0.204667	0.242058	-2.45257	TSN	Group2	Stress_Y16
LOC_Os02g52460	NA	zinc knuckle domain containing protein, expressed	2	32095322	32098710	S2_32096842	A/G	2	32096842	6.0578e-05	0.274788	353	0.204667	0.242237	-2.48618	TSN	Group2	Stress_Y16
LOC_Os02g52460	NA	zinc knuckle domain containing protein, expressed	2	32095322	32098710	S2_32096853	A/G	2	32096853	6.93811e-05	0.274788	353	0.204667	0.241623	2.67582	TSN	Group2	Stress_Y16
LOC_Os02g52460	NA	zinc knuckle domain containing protein, expressed	2	32095322	32098710	S2_32096883	A/G	2	32096883	1.5874e-05	0.284703	353	0.204667	0.248343	2.72383	TSN	Group2	Stress_Y16
LOC_Os02g52460	NA	zinc knuckle domain containing protein, expressed	2	32095322	32098710	S2_32096914	A/G	2	32096914	9.14828e-05	0.280453	353	0.204667	0.240375	2.14989	TSN	Group2	Stress_Y16
LOC_Os02g52460	NA	zinc knuckle domain containing protein, expressed	2	32095322	32098710	S2_32096955	A/G	2	32096955	2.29233e-05	0.274788	353	0.204667	0.246659	NA	TSN	Group2	Stress_Y16
LOC_Os02g52460	NA	zinc knuckle domain containing protein, expressed	2	32095322	32098710	S2_32097025	A/G	2	32097025	8.4711e-05	0.28187	353	0.204667	0.240722	-2.93366	TSN	Group2	Stress_Y16
LOC_Os02g52460	NA	zinc knuckle domain containing protein, expressed	2	32095322	32098710	S2_32097090	C/T	2	32097090	7.26063e-05	0.287535	353	0.204667	0.241418	-0.970254	TSN	Group2	Stress_Y16
LOC_Os02g52460	NA	zinc knuckle domain containing protein, expressed	2	32095322	32098710	S2_32097091	T/C	2	32097091	3.85848e-05	0.283286	353	0.204667	0.244284	0.258735	TSN	Group2	Stress_Y16
LOC_Os02g52460	NA	zinc knuckle domain containing protein, expressed	2	32095322	32098710	S2_32097180	T/C	2	32097180	7.90871e-05	0.274788	353	0.204667	0.241032	1.96368	TSN	Group2	Stress_Y16
LOC_Os02g52460	NA	zinc knuckle domain containing protein, expressed	2	32095322	32098710	S2_32097262	T/C	2	32097262	2.31632e-05	0.273371	353	0.204667	0.246611	2.74507	TSN	Group2	Stress_Y16
LOC_Os02g52460	NA	zinc knuckle domain containing protein, expressed	2	32095322	32098710	S2_32097313	G/A	2	32097313	5.70689e-05	0.28187	353	0.204667	0.242507	2.60755	TSN	Group2	Stress_Y16
LOC_Os02g52460	NA	zinc knuckle domain containing protein, expressed	2	32095322	32098710	S2_32097629	A/T	2	32097629	6.09009e-05	0.28187	353	0.204667	0.242213	-2.15986	TSN	Group2	Stress_Y16
LOC_Os02g52460	NA	zinc knuckle domain containing protein, expressed	2	32095322	32098710	S2_32097743	C/G	2	32097743	9.36892e-06	0.27762	353	0.204667	0.250769	-2.10954	TSN	Group2	Stress_Y16
LOC_Os02g52460	NA	zinc knuckle domain containing protein, expressed	2	32095322	32098710	S2_32097753	C/A	2	32097753	9.33706e-06	0.28187	353	0.204667	0.250785	2.71029	TSN	Group2	Stress_Y16
LOC_Os02g52460	NA	zinc knuckle domain containing protein, expressed	2	32095322	32098710	S2_32097759	C/A	2	32097759	3.48776e-05	0.313031	353	0.204667	0.244743	3.07173	TSN	Group2	Stress_Y16
LOC_Os02g52460	NA	zinc knuckle domain containing protein, expressed	2	32095322	32098710	S2_32097760	A/G	2	32097760	2.5508e-05	0.313031	353	0.204667	0.24617	2.34309	TSN	Group2	Stress_Y16
LOC_Os02g52460	NA	zinc knuckle domain containing protein, expressed	2	32095322	32098710	S2_32097885	A/C	2	32097885	3.1427e-05	0.293201	353	0.204667	0.245218	-1.58511	TSN	Group2	Stress_Y16
LOC_Os02g52460	NA	zinc knuckle domain containing protein, expressed	2	32095322	32098710	S2_32098165	A/T	2	32098165	7.0547e-05	0.291785	353	0.204667	0.241548	3.38815	TSN	Group2	Stress_Y16
LOC_Os02g52470	NA	ATP-binding domain-containing protein, putative, expressed	2	32099086	32102975	S2_32099170	A/G	2	32099170	7.80718e-05	0.28187	353	0.204667	0.24109	1.96517	TSN	Group2	Stress_Y16
LOC_Os02g52470	NA	ATP-binding domain-containing protein, putative, expressed	2	32099086	32102975	S2_32099860	A/G	2	32099860	5.11521e-05	0.240793	353	0.204667	0.243003	-3.43155	TSN	Group2	Stress_Y16
LOC_Os02g52470	NA	ATP-binding domain-containing protein, putative, expressed	2	32099086	32102975	S2_32099891	G/A	2	32099891	1.86305e-05	0.27762	353	0.204667	0.247608	2.41667	TSN	Group2	Stress_Y16
LOC_Os02g52470	NA	ATP-binding domain-containing protein, putative, expressed	2	32099086	32102975	S2_32100288	G/A	2	32100288	1.33149e-05	0.274788	353	0.204667	0.24915	-2.67189	TSN	Group2	Stress_Y16
LOC_Os02g52470	NA	ATP-binding domain-containing protein, putative, expressed	2	32099086	32102975	S2_32102504	C/T	2	32102504	6.45859e-05	0.232295	353	0.204667	0.241947	4.11861	TSN	Group2	Stress_Y16
LOC_Os02g52510	NA	SNF2 family N-terminal domain containing protein, expressed	2	32125277	32134832	S2_32127914	G/A	2	32127914	6.24785e-05	0.250708	353	0.204667	0.242097	-2.86106	TSN	Group2	Stress_Y16
LOC_Os02g52510	NA	SNF2 family N-terminal domain containing protein, expressed	2	32125277	32134832	S2_32128428	C/T	2	32128428	6.27032e-05	0.252125	353	0.204667	0.242081	1.6223	TSN	Group2	Stress_Y16
LOC_Os02g52560	NA	xyloglucan fucosyltransferase, putative, expressed	2	32164510	32167819	S2_32166231	T/A	2	32166231	6.32797e-05	0.246459	353	0.204667	0.242039	1.69013	TSN	Group2	Stress_Y16
LOC_Os02g52580	NA	retrotransposon protein, putative, unclassified, expressed	2	32172681	32176147	S2_32173471	A/G	2	32173471	3.06136e-05	0.249292	353	0.204667	0.245338	15.4459	TSN	Group2	Stress_Y16
LOC_Os02g52580	NA	retrotransposon protein, putative, unclassified, expressed	2	32172681	32176147	S2_32173564	C/G	2	32173564	7.67758e-05	0.253541	353	0.204667	0.241166	-2.46875	TSN	Group2	Stress_Y16
LOC_Os02g52580	NA	retrotransposon protein, putative, unclassified, expressed	2	32172681	32176147	S2_32174681	A/G	2	32174681	4.16137e-05	0.252125	353	0.204667	0.24394	2.21098	TSN	Group2	Stress_Y16
LOC_Os02g52580	NA	retrotransposon protein, putative, unclassified, expressed	2	32172681	32176147	S2_32174750	C/T	2	32174750	8.04925e-05	0.256374	353	0.204667	0.240952	-3.03287	TSN	Group2	Stress_Y16
LOC_Os02g52610	NA	xyloglucan fucosyltransferase, putative, expressed	2	32179355	32187431	S2_32183399	A/G	2	32183399	4.88506e-05	0.276204	353	0.204667	0.243212	-1.43391	TSN	Group2	Stress_Y16
LOC_Os02g52630	NA	xyloglucan fucosyltransferase, putative, expressed	2	32191247	32193989	S2_32192207	G/T	2	32192207	2.27907e-05	0.253541	353	0.204667	0.246685	-0.122863	TSN	Group2	Stress_Y16
LOC_Os02g52630	NA	xyloglucan fucosyltransferase, putative, expressed	2	32191247	32193989	S2_32192241	G/A	2	32192241	5.5373e-05	0.250708	353	0.204667	0.242644	2.22296	TSN	Group2	Stress_Y16
LOC_Os02g52630	NA	xyloglucan fucosyltransferase, putative, expressed	2	32191247	32193989	S2_32192771	A/T	2	32192771	6.88031e-05	0.252125	353	0.204667	0.241661	2.1214	TSN	Group2	Stress_Y16
LOC_Os02g52630	NA	xyloglucan fucosyltransferase, putative, expressed	2	32191247	32193989	S2_32193868	T/G	2	32193868	6.07741e-05	0.252125	353	0.204667	0.242222	0.67364	TSN	Group2	Stress_Y16
LOC_Os02g52640	NA	xyloglucan fucosyltransferase, putative, expressed	2	32197044	32199488	S2_32198253	T/G	2	32198253	9.23728e-05	0.254958	353	0.204667	0.240332	1.83817	TSN	Group2	Stress_Y16
LOC_Os02g52640	NA	xyloglucan fucosyltransferase, putative, expressed	2	32197044	32199488	S2_32198635	T/C	2	32198635	2.5291e-05	0.260623	353	0.204667	0.246209	0.462254	TSN	Group2	Stress_Y16
LOC_Os02g52660	NA	expressed protein	2	32202514	32203569	S2_32202750	T/C	2	32202750	9.26443e-05	0.253541	353	0.204667	0.240319	0.614979	TSN	Group2	Stress_Y16
LOC_Os02g52660	NA	expressed protein	2	32202514	32203569	S2_32203208	A/G	2	32203208	3.45595e-05	0.252125	353	0.204667	0.244785	-0.448618	TSN	Group2	Stress_Y16
LOC_Os02g52660	NA	expressed protein	2	32202514	32203569	S2_32203226	A/G	2	32203226	3.49397e-05	0.253541	353	0.204667	0.244735	0.283827	TSN	Group2	Stress_Y16
LOC_Os02g52660	NA	expressed protein	2	32202514	32203569	S2_32203248	G/A	2	32203248	3.77804e-05	0.253541	353	0.204667	0.24438	-0.760241	TSN	Group2	Stress_Y16
LOC_Os02g52710	AmyI-1|RAmy1A	alpha-amylase precursor, putative, expressed	2	32248279	32250180	S2_32248605	A/G	2	32248605	6.08667e-05	0.259207	353	0.204667	0.242215	-3.48332	TSN	Group2	Stress_Y16
LOC_Os02g52730	NA	ferredoxin--nitrite reductase, putative, expressed	2	32254049	32257357	S2_32256357	G/A	2	32256357	4.88362e-05	0.25779	353	0.204667	0.243213	-1.15033	TSN	Group2	Stress_Y16
LOC_Os02g52730	NA	ferredoxin--nitrite reductase, putative, expressed	2	32254049	32257357	S2_32257153	A/G	2	32257153	5.75124e-05	0.260623	353	0.204667	0.242472	-2.58566	TSN	Group2	Stress_Y16
LOC_Os02g52730	NA	ferredoxin--nitrite reductase, putative, expressed	2	32254049	32257357	S2_32257161	A/G	2	32257161	1.63705e-05	0.266289	353	0.204667	0.248201	0.736646	TSN	Group2	Stress_Y16
LOC_Os02g52730	NA	ferredoxin--nitrite reductase, putative, expressed	2	32254049	32257357	S2_32257248	T/G	2	32257248	3.97735e-05	0.264873	353	0.204667	0.244146	-1.31943	TSN	Group2	Stress_Y16
LOC_Os02g52730	NA	ferredoxin--nitrite reductase, putative, expressed	2	32254049	32257357	S2_32257339	A/G	2	32257339	7.73954e-06	0.260623	353	0.204667	0.251652	-0.469744	TSN	Group2	Stress_Y16
LOC_Os02g52760	NA	hypothetical protein	2	32268903	32269399	S2_32269204	A/C	2	32269204	2.48575e-05	0.140227	353	0.204667	0.246288	1.66366	TSN	Group2	Stress_Y16
LOC_Os02g52760	NA	hypothetical protein	2	32268903	32269399	S2_32269340	A/G	2	32269340	5.10673e-05	0.252125	353	0.204667	0.243011	2.42099	TSN	Group2	Stress_Y16
LOC_Os02g52770	NA	expressed protein	2	32273867	32275255	S2_32274023	T/C	2	32274023	8.63775e-05	0.256374	353	0.204667	0.240634	-0.168387	TSN	Group2	Stress_Y16
LOC_Os02g52770	NA	expressed protein	2	32273867	32275255	S2_32274368	T/C	2	32274368	8.56325e-05	0.320113	353	0.204667	0.240673	3.19361	TSN	Group2	Stress_Y16
LOC_Os02g52820	NA	cold-induced protein, putative, expressed	2	32295320	32298691	S2_32295322	T/C	2	32295322	7.64231e-05	0.252125	353	0.204667	0.241187	0.561244	TSN	Group2	Stress_Y16
LOC_Os02g52830	NA	lipase, putative, expressed	2	32299774	32303982	S2_32303539	A/T	2	32303539	4.46287e-05	0.254958	353	0.204667	0.243622	0.200331	TSN	Group2	Stress_Y16
LOC_Os02g52840	FLS	flavonol synthase/flavanone 3-hydroxylase, putative, expressed	2	32310799	32312184	S2_32312089	T/C	2	32312089	5.94774e-05	0.267705	353	0.204667	0.24232	-0.702118	TSN	Group2	Stress_Y16
LOC_Os02g52850	NA	receptor-like protein kinase like protein, putative, expressed	2	32312866	32315992	S2_32315014	T/C	2	32315014	5.5821e-05	0.254958	353	0.204667	0.242607	-0.153168	TSN	Group2	Stress_Y16
LOC_Os02g52850	NA	receptor-like protein kinase like protein, putative, expressed	2	32312866	32315992	S2_32315671	A/C	2	32315671	3.57373e-05	0.263456	353	0.204667	0.244633	2.12403	TSN	Group2	Stress_Y16
LOC_Os02g52860	NA	phosphate carrier protein, mitochondrial precursor, putative, expressed	2	32319364	32323332	S2_32319425	A/T	2	32319425	5.90405e-05	0.260623	353	0.204667	0.242353	0.225062	TSN	Group2	Stress_Y16
LOC_Os02g52860	NA	phosphate carrier protein, mitochondrial precursor, putative, expressed	2	32319364	32323332	S2_32323213	A/C	2	32323213	4.03372e-05	0.253541	353	0.204667	0.244082	-1.44205	TSN	Group2	Stress_Y16
LOC_Os02g55120	NA	translation initiation factor IF-3, putative, expressed	2	33758966	33762633	S2_33760851	T/C	2	33760851	3.76741e-06	0.144476	353	0.204667	0.254991	0.28399	TSN	Group2	Stress_Y16
LOC_Os03g27484	NA	retrotransposon protein, putative, unclassified, expressed	3	15770461	15773174	S3_15773112	T/C	3	15773112	8.02982e-05	0.460568	317	0.046649	0.0952956	-1.15373	SSR	Group2	Stress_Y16
LOC_Os03g27484	NA	retrotransposon protein, putative, unclassified, expressed	3	15770461	15773174	S3_15773112	T/C	3	15773112	6.48389e-05	0.448485	330	0.0572766	0.104643	-1.21274	FGN	Group2	Stress_Y16
LOC_Os03g27870	NA	transposon protein, putative, CACTA, En/Spm sub-class, expressed	3	16008727	16015212	S3_16012266	A/G	3	16012266	6.11117e-05	0.452681	317	0.046649	0.0969538	0.979277	SSR	Group2	Stress_Y16
LOC_Os03g27970	NA	WD domain, G-beta repeat domain containing protein, expressed	3	16065984	16067702	S3_16067455	T/A	3	16067455	3.26455e-05	0.470032	317	0.046649	0.100781	-2.33154	SSR	Group2	Stress_Y16
LOC_Os03g27970	NA	WD domain, G-beta repeat domain containing protein, expressed	3	16065984	16067702	S3_16067455	T/A	3	16067455	9.72872e-05	0.459091	330	0.0572766	0.102312	-4.14059	FGN	Group2	Stress_Y16
LOC_Os03g28010	NA	retrotransposon protein, putative, unclassified, expressed	3	16093271	16103200	S3_16094717	T/A	3	16094717	5.89609e-05	0.455836	317	0.046649	0.0971717	-2.75887	SSR	Group2	Stress_Y16
LOC_Os03g28010	NA	retrotransposon protein, putative, unclassified, expressed	3	16093271	16103200	S3_16094717	T/A	3	16094717	6.10125e-05	0.445455	330	0.0572766	0.104993	1.43332	FGN	Group2	Stress_Y16
LOC_Os03g28030	NA	expressed protein	3	16113603	16115173	S3_16114203	C/T	3	16114203	1.29564e-06	0.457413	317	0.046649	0.120883	3.62617	SSR	Group2	Stress_Y16
LOC_Os03g28030	NA	expressed protein	3	16113603	16115173	S3_16114203	C/T	3	16114203	8.28845e-05	0.445455	330	0.0572766	0.103231	2.07627	FGN	Group2	Stress_Y16
LOC_Os03g28070	NA	expressed protein	3	16133593	16134773	S3_16133819	C/T	3	16133819	6.31611e-05	0.111111	387	0.00708178	0.0495135	-0.0146639	SN	Group2	Stress_Y16
LOC_Os03g28140	NA	1-phosphatidylinositol-4-phosphate 5-kinase/ zinc ion binding protein, putative, expressed	3	16182022	16192749	S3_16183113	A/G	3	16183113	9.78736e-05	0.471609	317	0.046649	0.0940971	1.80361	SSR	Group2	Stress_Y16
LOC_Os03g28140	NA	1-phosphatidylinositol-4-phosphate 5-kinase/ zinc ion binding protein, putative, expressed	3	16182022	16192749	S3_16183389	T/A	3	16183389	9.15857e-05	0.477918	317	0.046649	0.0944989	0.0563555	SSR	Group2	Stress_Y16
LOC_Os03g28140	NA	1-phosphatidylinositol-4-phosphate 5-kinase/ zinc ion binding protein, putative, expressed	3	16182022	16192749	S3_16187155	A/G	3	16187155	6.09599e-05	0.237879	330	0.0572766	0.104998	-4.40862	FGN	Group2	Stress_Y16
LOC_Os03g28140	NA	1-phosphatidylinositol-4-phosphate 5-kinase/ zinc ion binding protein, putative, expressed	3	16182022	16192749	S3_16187198	G/T	3	16187198	9.3611e-05	0.478188	298	0.0223987	0.0745812	1.19348	GY	Group2	Stress_Y16
LOC_Os03g28140	NA	1-phosphatidylinositol-4-phosphate 5-kinase/ zinc ion binding protein, putative, expressed	3	16182022	16192749	S3_16192678	T/G	3	16192678	6.48319e-05	0.228788	330	0.0572766	0.104644	-1.47964	FGN	Group2	Stress_Y16
LOC_Os03g28160	NA	jacalin-like lectin domain containing protein, expressed	3	16209132	16210085	S3_16209326	T/C	3	16209326	9.56086e-05	0.213636	330	0.0572766	0.102412	-1.9175	FGN	Group2	Stress_Y16
LOC_Os03g28289	NA	expressed protein	3	16280355	16282155	S3_16280457	C/A	3	16280457	3.94737e-05	0.485804	317	0.046649	0.0996191	-6.58012	SSR	Group2	Stress_Y16
LOC_Os03g28300	NA	protein kinase domain containing protein, expressed	3	16282710	16290482	S3_16283199	A/G	3	16283199	3.76588e-05	0.490536	317	0.046649	0.0999069	0.317117	SSR	Group2	Stress_Y16
LOC_Os03g28300	NA	protein kinase domain containing protein, expressed	3	16282710	16290482	S3_16285485	T/C	3	16285485	4.28606e-05	0.484227	317	0.046649	0.0991161	NA	SSR	Group2	Stress_Y16
LOC_Os03g28300	NA	protein kinase domain containing protein, expressed	3	16282710	16290482	S3_16285485	T/C	3	16285485	7.58319e-05	0.466667	330	0.0572766	0.103742	NA	FGN	Group2	Stress_Y16
LOC_Os03g28300	NA	protein kinase domain containing protein, expressed	3	16282710	16290482	S3_16285559	G/A	3	16285559	3.78368e-05	0.485804	317	0.046649	0.0998781	1.88436	SSR	Group2	Stress_Y16
LOC_Os03g28300	NA	protein kinase domain containing protein, expressed	3	16282710	16290482	S3_16286694	T/G	3	16286694	9.95081e-05	0.454259	317	0.046649	0.0939969	-0.767207	SSR	Group2	Stress_Y16
LOC_Os03g28300	NA	protein kinase domain containing protein, expressed	3	16282710	16290482	S3_16288485	A/G	3	16288485	6.52125e-05	0.466667	330	0.0572766	0.10461	2.98832	FGN	Group2	Stress_Y16
LOC_Os03g28300	NA	protein kinase domain containing protein, expressed	3	16282710	16290482	S3_16288485	A/G	3	16288485	1.37203e-05	0.484227	317	0.046649	0.106117	3.06973	SSR	Group2	Stress_Y16
LOC_Os03g28330	NA	sucrose synthase, putative, expressed	3	16301277	16307632	S3_16301618	G/A	3	16301618	6.56092e-05	0.462121	330	0.0572766	0.104575	4.30198	FGN	Group2	Stress_Y16
LOC_Os03g28330	NA	sucrose synthase, putative, expressed	3	16301277	16307632	S3_16301618	G/A	3	16301618	2.84758e-05	0.479495	317	0.046649	0.101619	2.2009	SSR	Group2	Stress_Y16
LOC_Os03g28330	NA	sucrose synthase, putative, expressed	3	16301277	16307632	S3_16305064	A/C	3	16305064	8.07703e-06	0.485804	317	0.046649	0.109403	0.180772	SSR	Group2	Stress_Y16
LOC_Os03g28969	NA	expressed protein	3	16443600	16446117	S3_16445310	T/C	3	16445310	2.78356e-05	0.455836	317	0.046649	0.101759	0.645446	SSR	Group2	Stress_Y16
LOC_Os03g28969	NA	expressed protein	3	16443600	16446117	S3_16445310	T/C	3	16445310	1.27272e-05	0.44697	330	0.0572766	0.114104	1.06498	FGN	Group2	Stress_Y16
LOC_Os03g29180	NA	ubiquinone biosynthesis protein COQ9, mitochondrial precursor, putative, expressed	3	16580151	16586153	S3_16581952	T/C	3	16581952	9.19789e-06	0.4653	317	0.046649	0.108595	0.769108	SSR	Group2	Stress_Y16
LOC_Os03g29180	NA	ubiquinone biosynthesis protein COQ9, mitochondrial precursor, putative, expressed	3	16580151	16586153	S3_16581952	T/C	3	16581952	1.45094e-06	0.457576	330	0.0572766	0.126966	-0.331613	FGN	Group2	Stress_Y16
LOC_Os03g29190	NA	PDI, putative, expressed	3	16590187	16595991	S3_16592238	A/G	3	16592238	2.27126e-06	0.45303	330	0.0572766	0.12429	2.14732	FGN	Group2	Stress_Y16
LOC_Os03g29190	NA	PDI, putative, expressed	3	16590187	16595991	S3_16592238	A/G	3	16592238	2.71272e-06	0.466877	317	0.046649	0.116223	4.28425	SSR	Group2	Stress_Y16
LOC_Os03g29260	EF-1beta2	elongation factor protein, putative, expressed	3	16654331	16658820	S3_16655682	G/A	3	16655682	1.56464e-05	0.473186	317	0.046649	0.105305	-0.116499	SSR	Group2	Stress_Y16
LOC_Os03g29260	EF-1beta2	elongation factor protein, putative, expressed	3	16654331	16658820	S3_16655682	G/A	3	16655682	5.90471e-06	0.463636	330	0.0572766	0.118623	0.404627	FGN	Group2	Stress_Y16
LOC_Os03g29290	NA	transposon protein, putative, CACTA, En/Spm sub-class, expressed	3	16676287	16679941	S3_16677763	C/G	3	16677763	4.11372e-05	0.157576	330	0.0572766	0.10727	-0.986622	FGN	Group2	Stress_Y16
LOC_Os03g29290	NA	transposon protein, putative, CACTA, En/Spm sub-class, expressed	3	16676287	16679941	S3_16678106	A/G	3	16678106	2.99495e-05	0.287879	330	0.0572766	0.109111	-0.30808	FGN	Group2	Stress_Y16
LOC_Os03g29290	NA	transposon protein, putative, CACTA, En/Spm sub-class, expressed	3	16676287	16679941	S3_16678376	G/A	3	16678376	9.55236e-06	0.213636	330	0.0572766	0.115788	-0.782742	FGN	Group2	Stress_Y16
LOC_Os03g29290	NA	transposon protein, putative, CACTA, En/Spm sub-class, expressed	3	16676287	16679941	S3_16678691	C/T	3	16678691	7.26579e-06	0.292424	330	0.0572766	0.117399	-1.20047	FGN	Group2	Stress_Y16
LOC_Os03g29290	NA	transposon protein, putative, CACTA, En/Spm sub-class, expressed	3	16676287	16679941	S3_16678691	C/T	3	16678691	5.09607e-05	0.285235	298	0.0223987	0.078627	0.942268	GY	Group2	Stress_Y16
LOC_Os03g29290	NA	transposon protein, putative, CACTA, En/Spm sub-class, expressed	3	16676287	16679941	S3_16678691	C/T	3	16678691	3.44936e-05	0.290221	317	0.046649	0.100444	-0.750546	SSR	Group2	Stress_Y16
LOC_Os03g29310	NA	transposon protein, putative, CACTA, En/Spm sub-class, expressed	3	16681864	16684886	S3_16682489	C/A	3	16682489	5.97505e-05	0.295455	330	0.0572766	0.105114	1.40314	FGN	Group2	Stress_Y16
LOC_Os03g29310	NA	transposon protein, putative, CACTA, En/Spm sub-class, expressed	3	16681864	16684886	S3_16683082	G/T	3	16683082	8.16132e-05	0.369697	330	0.0572766	0.10332	0.715013	FGN	Group2	Stress_Y16
LOC_Os03g29310	NA	transposon protein, putative, CACTA, En/Spm sub-class, expressed	3	16681864	16684886	S3_16684200	A/G	3	16684200	7.05815e-05	0.369697	330	0.0572766	0.104155	1.16501	FGN	Group2	Stress_Y16
LOC_Os03g29310	NA	transposon protein, putative, CACTA, En/Spm sub-class, expressed	3	16681864	16684886	S3_16684231	T/C	3	16684231	6.29792e-05	0.154545	330	0.0572766	0.104811	-0.977098	FGN	Group2	Stress_Y16
LOC_Os03g29350	NA	von Willebrand factor type A domain containing protein, expressed	3	16695922	16704617	S3_16698018	G/A	3	16698018	2.2776e-05	0.209091	330	0.0572766	0.110703	-1.70609	FGN	Group2	Stress_Y16
LOC_Os03g29350	NA	von Willebrand factor type A domain containing protein, expressed	3	16695922	16704617	S3_16699633	T/G	3	16699633	9.68253e-05	0.189394	330	0.0572766	0.102339	1.10775	FGN	Group2	Stress_Y16
LOC_Os03g29350	NA	von Willebrand factor type A domain containing protein, expressed	3	16695922	16704617	S3_16703703	C/G	3	16703703	2.93793e-05	0.206061	330	0.0572766	0.109222	1.7593	FGN	Group2	Stress_Y16
LOC_Os03g29350	NA	von Willebrand factor type A domain containing protein, expressed	3	16695922	16704617	S3_16703998	T/C	3	16703998	3.64622e-05	0.2	330	0.0572766	0.107969	-1.82943	FGN	Group2	Stress_Y16
LOC_Os03g29370	NA	hypothetical protein	3	16723110	16723877	S3_16723443	C/T	3	16723443	5.82288e-05	0.392424	330	0.0572766	0.105263	0.862767	FGN	Group2	Stress_Y16
LOC_Os03g29370	NA	hypothetical protein	3	16723110	16723877	S3_16723444	T/C	3	16723444	8.91927e-05	0.389394	330	0.0572766	0.10281	1.09476	FGN	Group2	Stress_Y16
LOC_Os03g29389	NA	hypothetical protein	3	16739597	16741076	S3_16740319	G/A	3	16740319	2.99002e-05	0.416667	330	0.0572766	0.10912	-0.622773	FGN	Group2	Stress_Y16
LOC_Os03g29389	NA	hypothetical protein	3	16739597	16741076	S3_16740483	A/C	3	16740483	7.67691e-05	0.210606	330	0.0572766	0.103671	1.69384	FGN	Group2	Stress_Y16
LOC_Os03g29389	NA	hypothetical protein	3	16739597	16741076	S3_16740497	A/C	3	16740497	1.4165e-05	0.460568	317	0.046649	0.10592	0.281009	SSR	Group2	Stress_Y16
LOC_Os03g29389	NA	hypothetical protein	3	16739597	16741076	S3_16740497	A/C	3	16740497	1.50293e-06	0.45303	330	0.0572766	0.126755	-1.48768	FGN	Group2	Stress_Y16
LOC_Os03g29410	NA	tyrosine protein kinase domain containing protein, putative, expressed	3	16749300	16754225	S3_16750312	A/C	3	16750312	5.81265e-05	0.192424	330	0.0572766	0.105273	-1.60654	FGN	Group2	Stress_Y16
LOC_Os03g29410	NA	tyrosine protein kinase domain containing protein, putative, expressed	3	16749300	16754225	S3_16750313	A/C	3	16750313	2.56492e-05	0.192424	330	0.0572766	0.110012	1.83928	FGN	Group2	Stress_Y16
LOC_Os03g29410	NA	tyrosine protein kinase domain containing protein, putative, expressed	3	16749300	16754225	S3_16751279	T/C	3	16751279	8.78077e-05	0.187879	330	0.0572766	0.1029	0.291164	FGN	Group2	Stress_Y16
LOC_Os03g29410	NA	tyrosine protein kinase domain containing protein, putative, expressed	3	16749300	16754225	S3_16752277	A/G	3	16752277	5.32987e-05	0.383333	330	0.0572766	0.105773	-2.02482	FGN	Group2	Stress_Y16
LOC_Os03g29410	NA	tyrosine protein kinase domain containing protein, putative, expressed	3	16749300	16754225	S3_16752941	C/G	3	16752941	7.39507e-05	0.210606	330	0.0572766	0.103886	0.638141	FGN	Group2	Stress_Y16
LOC_Os03g29410	NA	tyrosine protein kinase domain containing protein, putative, expressed	3	16749300	16754225	S3_16753042	A/T	3	16753042	7.1227e-05	0.289394	330	0.0572766	0.104102	-1.85209	FGN	Group2	Stress_Y16
LOC_Os03g29410	NA	tyrosine protein kinase domain containing protein, putative, expressed	3	16749300	16754225	S3_16753046	G/T	3	16753046	6.6069e-05	0.192424	330	0.0572766	0.104535	1.55446	FGN	Group2	Stress_Y16
LOC_Os03g29420	NA	hypothetical protein	3	16765551	16766685	S3_16766172	A/G	3	16766172	4.0541e-05	0.331818	330	0.0572766	0.107355	2.60616	FGN	Group2	Stress_Y16
LOC_Os03g29420	NA	hypothetical protein	3	16765551	16766685	S3_16766433	T/C	3	16766433	4.3478e-05	0.325758	330	0.0572766	0.10695	-1.21031	FGN	Group2	Stress_Y16
LOC_Os03g29430	NA	retrotransposon protein, putative, unclassified	3	16771142	16775434	S3_16772726	A/T	3	16772726	2.29654e-05	0.386364	330	0.0572766	0.110655	-1.6665	FGN	Group2	Stress_Y16
LOC_Os03g29430	NA	retrotransposon protein, putative, unclassified	3	16771142	16775434	S3_16773635	T/C	3	16773635	5.6545e-05	0.339394	330	0.0572766	0.105432	1.54369	FGN	Group2	Stress_Y16
LOC_Os03g29430	NA	retrotransposon protein, putative, unclassified	3	16771142	16775434	S3_16773660	G/A	3	16773660	4.44269e-05	0.342424	330	0.0572766	0.106825	-1.54369	FGN	Group2	Stress_Y16
LOC_Os03g29430	NA	retrotransposon protein, putative, unclassified	3	16771142	16775434	S3_16774820	A/G	3	16774820	4.71974e-05	0.271212	330	0.0572766	0.106475	-0.820079	FGN	Group2	Stress_Y16
LOC_Os03g29440	NA	retrotransposon protein, putative, unclassified, expressed	3	16778970	16781678	S3_16780771	T/C	3	16780771	9.77634e-05	0.383333	330	0.0572766	0.102284	-2.03915	FGN	Group2	Stress_Y16
LOC_Os03g29440	NA	retrotransposon protein, putative, unclassified, expressed	3	16778970	16781678	S3_16781002	A/G	3	16781002	2.02317e-05	0.357576	330	0.0572766	0.111394	2.02335	FGN	Group2	Stress_Y16
LOC_Os03g29440	NA	retrotransposon protein, putative, unclassified, expressed	3	16778970	16781678	S3_16781224	C/T	3	16781224	9.2204e-05	0.410606	330	0.0572766	0.10262	0.367509	FGN	Group2	Stress_Y16
LOC_Os03g29470	NA	transcription initiation factor IID, putative, expressed	3	16794234	16799486	S3_16796250	T/A	3	16796250	9.20534e-05	0.193939	330	0.0572766	0.102629	1.93613	FGN	Group2	Stress_Y16
LOC_Os03g29470	NA	transcription initiation factor IID, putative, expressed	3	16794234	16799486	S3_16796828	T/C	3	16796828	5.83651e-05	0.192424	330	0.0572766	0.105249	-1.71626	FGN	Group2	Stress_Y16
LOC_Os03g29510	NA	retrotransposon protein, putative, Ty3-gypsy subclass	3	16816331	16817970	S3_16816339	C/T	3	16816339	9.42727e-05	0.372727	330	0.0572766	0.102492	-1.30202	FGN	Group2	Stress_Y16
LOC_Os03g29510	NA	retrotransposon protein, putative, Ty3-gypsy subclass	3	16816331	16817970	S3_16816346	G/A	3	16816346	5.51529e-05	0.369697	330	0.0572766	0.105576	NA	FGN	Group2	Stress_Y16
LOC_Os03g29510	NA	retrotransposon protein, putative, Ty3-gypsy subclass	3	16816331	16817970	S3_16816451	C/G	3	16816451	5.0161e-05	0.356061	330	0.0572766	0.106123	-1.42077	FGN	Group2	Stress_Y16
LOC_Os03g29510	NA	retrotransposon protein, putative, Ty3-gypsy subclass	3	16816331	16817970	S3_16817115	G/C	3	16817115	6.20563e-05	0.392424	330	0.0572766	0.104896	-0.608952	FGN	Group2	Stress_Y16
LOC_Os03g29520	NA	retrotransposon protein, putative, unclassified, expressed	3	16820890	16829127	S3_16824338	A/G	3	16824338	6.52597e-05	0.237879	330	0.0572766	0.104606	3.47507	FGN	Group2	Stress_Y16
LOC_Os03g29520	NA	retrotransposon protein, putative, unclassified, expressed	3	16820890	16829127	S3_16825704	T/C	3	16825704	1.42013e-05	0.169697	330	0.0572766	0.113462	1.69932	FGN	Group2	Stress_Y16
LOC_Os03g29520	NA	retrotransposon protein, putative, unclassified, expressed	3	16820890	16829127	S3_16827549	A/G	3	16827549	3.1565e-05	0.165152	330	0.0572766	0.108806	NA	FGN	Group2	Stress_Y16
LOC_Os03g29540	NA	ATP-dependent protease, putative, expressed	3	16836622	16840754	S3_16839657	T/C	3	16839657	2.63776e-06	0.443939	330	0.0572766	0.1234	-2.72274	FGN	Group2	Stress_Y16
LOC_Os03g29540	NA	ATP-dependent protease, putative, expressed	3	16836622	16840754	S3_16839657	T/C	3	16839657	7.43136e-06	0.452681	317	0.046649	0.109921	0.351434	SSR	Group2	Stress_Y16
LOC_Os03g29540	NA	ATP-dependent protease, putative, expressed	3	16836622	16840754	S3_16839688	T/C	3	16839688	7.88788e-05	0.187879	330	0.0572766	0.103516	-0.111734	FGN	Group2	Stress_Y16
LOC_Os03g29540	NA	ATP-dependent protease, putative, expressed	3	16836622	16840754	S3_16839992	G/A	3	16839992	9.72646e-05	0.412121	330	0.0572766	0.102313	-0.215391	FGN	Group2	Stress_Y16
LOC_Os03g29540	NA	ATP-dependent protease, putative, expressed	3	16836622	16840754	S3_16840245	G/A	3	16840245	7.77844e-05	0.192424	330	0.0572766	0.103596	4.4968	FGN	Group2	Stress_Y16
LOC_Os03g29540	NA	ATP-dependent protease, putative, expressed	3	16836622	16840754	S3_16840381	C/T	3	16840381	7.82001e-05	0.363636	330	0.0572766	0.103565	4.21522	FGN	Group2	Stress_Y16
LOC_Os03g29560	NA	retrotransposon protein, putative, unclassified, expressed	3	16845706	16852808	S3_16847510	T/C	3	16847510	9.75264e-05	0.360606	330	0.0572766	0.102298	0.666196	FGN	Group2	Stress_Y16
LOC_Os03g29560	NA	retrotransposon protein, putative, unclassified, expressed	3	16845706	16852808	S3_16847917	C/T	3	16847917	4.64411e-05	0.334848	330	0.0572766	0.106569	0.671716	FGN	Group2	Stress_Y16
LOC_Os03g29560	NA	retrotransposon protein, putative, unclassified, expressed	3	16845706	16852808	S3_16848041	A/G	3	16848041	3.21395e-05	0.148485	330	0.0572766	0.108701	-0.169311	FGN	Group2	Stress_Y16
LOC_Os03g29570	NA	mps one binder kinase activator-like 1A, putative, expressed	3	16856521	16862763	S3_16862291	G/A	3	16862291	7.81327e-05	0.193939	330	0.0572766	0.10357	0.743152	FGN	Group2	Stress_Y16
LOC_Os03g29584	NA	expressed protein	3	16863935	16869048	S3_16864975	C/T	3	16864975	3.28502e-05	0.359091	330	0.0572766	0.108574	-3.67105	FGN	Group2	Stress_Y16
LOC_Os03g29584	NA	expressed protein	3	16863935	16869048	S3_16864975	C/T	3	16864975	5.41038e-05	0.350158	317	0.046649	0.0976951	1.22065	SSR	Group2	Stress_Y16
LOC_Os03g29584	NA	expressed protein	3	16863935	16869048	S3_16865123	C/G	3	16865123	6.58351e-05	0.372727	330	0.0572766	0.104555	-7.09824	FGN	Group2	Stress_Y16
LOC_Os03g29584	NA	expressed protein	3	16863935	16869048	S3_16865666	T/C	3	16865666	7.51767e-05	0.371212	330	0.0572766	0.103792	-5.51195	FGN	Group2	Stress_Y16
LOC_Os03g29584	NA	expressed protein	3	16863935	16869048	S3_16865802	A/C	3	16865802	5.89924e-05	0.195455	330	0.0572766	0.105188	3.27742	FGN	Group2	Stress_Y16
LOC_Os03g29584	NA	expressed protein	3	16863935	16869048	S3_16865866	A/G	3	16865866	8.99332e-05	0.372727	330	0.0572766	0.102763	0.0846351	FGN	Group2	Stress_Y16
LOC_Os03g29584	NA	expressed protein	3	16863935	16869048	S3_16866003	C/T	3	16866003	9.69974e-05	0.377273	330	0.0572766	0.102329	-1.2852	FGN	Group2	Stress_Y16
LOC_Os03g29584	NA	expressed protein	3	16863935	16869048	S3_16866218	A/T	3	16866218	6.78435e-05	0.210606	330	0.0572766	0.104382	4.27571	FGN	Group2	Stress_Y16
LOC_Os03g29584	NA	expressed protein	3	16863935	16869048	S3_16866254	T/C	3	16866254	9.10142e-05	0.204545	330	0.0572766	0.102694	7.83147	FGN	Group2	Stress_Y16
LOC_Os03g29584	NA	expressed protein	3	16863935	16869048	S3_16866547	G/A	3	16866547	5.61437e-07	0.457576	330	0.0572766	0.13267	6.966	FGN	Group2	Stress_Y16
LOC_Os03g29584	NA	expressed protein	3	16863935	16869048	S3_16866547	G/A	3	16866547	1.31231e-05	0.4653	317	0.046649	0.106393	1.74763	SSR	Group2	Stress_Y16
LOC_Os03g29650	NA	retrotransposon protein, putative, Ty3-gypsy subclass, expressed	3	16903662	16910223	S3_16904471	A/G	3	16904471	3.27413e-05	0.181818	330	0.0572766	0.108593	3.38183	FGN	Group2	Stress_Y16
LOC_Os03g29650	NA	retrotransposon protein, putative, Ty3-gypsy subclass, expressed	3	16903662	16910223	S3_16904914	A/G	3	16904914	8.57389e-05	0.398485	330	0.0572766	0.103037	0.734071	FGN	Group2	Stress_Y16
LOC_Os03g29650	NA	retrotransposon protein, putative, Ty3-gypsy subclass, expressed	3	16903662	16910223	S3_16906510	T/C	3	16906510	5.21011e-05	0.209091	330	0.0572766	0.105904	-0.565205	FGN	Group2	Stress_Y16
LOC_Os03g29650	NA	retrotransposon protein, putative, Ty3-gypsy subclass, expressed	3	16903662	16910223	S3_16908237	C/T	3	16908237	4.84401e-05	0.2	330	0.0572766	0.106325	-0.740574	FGN	Group2	Stress_Y16
LOC_Os03g29650	NA	retrotransposon protein, putative, Ty3-gypsy subclass, expressed	3	16903662	16910223	S3_16908929	C/T	3	16908929	8.29454e-05	0.371212	330	0.0572766	0.103227	2.17011	FGN	Group2	Stress_Y16
LOC_Os03g29650	NA	retrotransposon protein, putative, Ty3-gypsy subclass, expressed	3	16903662	16910223	S3_16909576	T/C	3	16909576	8.08583e-05	0.290909	330	0.0572766	0.103373	-0.121155	FGN	Group2	Stress_Y16
LOC_Os03g29650	NA	retrotransposon protein, putative, Ty3-gypsy subclass, expressed	3	16903662	16910223	S3_16909584	G/A	3	16909584	9.82903e-05	0.307576	330	0.0572766	0.102253	0.734801	FGN	Group2	Stress_Y16
LOC_Os03g29660	NA	retrotransposon protein, putative, unclassified, expressed	3	16910543	16913455	S3_16911031	A/G	3	16911031	5.97761e-05	0.368182	330	0.0572766	0.105111	-0.97642	FGN	Group2	Stress_Y16
LOC_Os03g29660	NA	retrotransposon protein, putative, unclassified, expressed	3	16910543	16913455	S3_16913020	A/T	3	16913020	8.43142e-05	0.256061	330	0.0572766	0.103133	0.423214	FGN	Group2	Stress_Y16
LOC_Os03g29940	NA	retrotransposon protein, putative, unclassified, expressed	3	17060068	17066694	S3_17061790	A/G	3	17061790	9.40322e-05	0.413636	330	0.0572766	0.102507	0.688067	FGN	Group2	Stress_Y16
LOC_Os03g29990	NA	expressed protein	3	17104259	17106268	S3_17104881	T/C	3	17104881	3.23702e-06	0.413636	330	0.0572766	0.122183	0.502266	FGN	Group2	Stress_Y16
LOC_Os03g29990	NA	expressed protein	3	17104259	17106268	S3_17104881	T/C	3	17104881	3.75282e-06	0.42429	317	0.046649	0.114187	0.0208622	SSR	Group2	Stress_Y16
LOC_Os03g31290	NA	membrane-anchored ubiquitin-fold protein, putative, expressed	3	17824178	17827706	S3_17827706	G/A	3	17827706	7.73156e-05	0.431818	330	0.0572766	0.103631	-0.256097	FGN	Group2	Stress_Y16
LOC_Os03g39660	NA	expressed protein	3	22056764	22058465	S3_22058161	G/A	3	22058161	9.96279e-05	0.15	220	0.0298025	0.100445	0.107654	TGW	Group2	Stress_Y16
LOC_Os03g44530	NA	GTPase of unknown function domain containing protein, putative, expressed	3	25062638	25066824	S3_25066483	A/G	3	25066483	3.57412e-05	0.0704545	220	0.0298025	0.109867	0.323501	TGW	Group2	Stress_Y16
LOC_Os03g58764	NA	OsFBDUF18 - F-box and DUF domain containing protein, expressed	3	33466091	33472069	S3_33468504	A/G	3	33468504	3.47637e-05	0.175385	325	0.0606353	0.112236	-0.262966	PN	Group2	Stress_Y16
LOC_Os03g60950	NA	expressed protein	3	34633591	34635264	S3_34633969	C/G	3	34633969	6.45779e-05	0.0742424	330	0.0572766	0.104666	-2.13232	FGN	Group2	Stress_Y16
LOC_Os03g60950	NA	expressed protein	3	34633591	34635264	S3_34634029	T/A	3	34634029	6.95255e-05	0.0818182	330	0.0572766	0.104241	2.25343	FGN	Group2	Stress_Y16
LOC_Os03g60992	NA	expressed protein	3	34646212	34653500	S3_34653326	C/T	3	34653326	7.78815e-05	0.069697	330	0.0572766	0.103589	2.56461	FGN	Group2	Stress_Y16
LOC_Os03g60992	NA	expressed protein	3	34646212	34653500	S3_34653327	A/C	3	34653327	5.07914e-05	0.0712121	330	0.0572766	0.106051	1.47538	FGN	Group2	Stress_Y16
LOC_Os04g23240	NA	transposon protein, putative, CACTA, En/Spm sub-class, expressed	4	13257602	13262452	S4_13260186	A/G	4	13260186	4.13524e-05	0.0509915	353	0.204667	0.243969	2.20245	TSN	Group2	Stress_Y16
LOC_Os04g23240	NA	transposon protein, putative, CACTA, En/Spm sub-class, expressed	4	13257602	13262452	S4_13261985	A/G	4	13261985	6.44707e-05	0.0793201	353	0.204667	0.241955	7.26625	TSN	Group2	Stress_Y16
LOC_Os04g32840	NA	formin-like protein 20, putative, expressed	4	19826312	19827902	S4_19827610	A/G	4	19827610	6.67482e-05	0.0679348	184	0.0118261	0.103379	0.0560104	PN	Group1	Stress_Y16
LOC_Os04g40180	NA	expressed protein	4	23912883	23915214	S4_23913126	C/T	4	23913126	6.87616e-05	0.295455	330	0.0572766	0.104305	1.93358	FGN	Group2	Stress_Y16
LOC_Os04g40180	NA	expressed protein	4	23912883	23915214	S4_23913145	T/A	4	23913145	8.71118e-05	0.284848	330	0.0572766	0.102946	-4.69669	FGN	Group2	Stress_Y16
LOC_Os04g40180	NA	expressed protein	4	23912883	23915214	S4_23913146	G/A	4	23913146	7.60488e-05	0.283333	330	0.0572766	0.103726	2.03819	FGN	Group2	Stress_Y16
LOC_Os04g40330	NA	OsFBX141 - F-box domain containing protein, expressed	4	23976077	23979533	S4_23976837	A/G	4	23976837	6.9378e-05	0.378788	330	0.0572766	0.104254	1.40841	FGN	Group2	Stress_Y16
LOC_Os04g40330	NA	OsFBX141 - F-box domain containing protein, expressed	4	23976077	23979533	S4_23976858	A/T	4	23976858	1.76083e-05	0.371212	330	0.0572766	0.112205	-1.41091	FGN	Group2	Stress_Y16
LOC_Os04g40370	NA	OsFBX142 - F-box domain containing protein, expressed	4	23998827	24002250	S4_24001913	G/A	4	24001913	4.31812e-05	0.263456	353	0.204667	0.243772	-1.65278	TSN	Group2	Stress_Y16
LOC_Os04g51690	NA	glycosyl hydrolase family 47 domain contain protein, expressed	4	30621160	30628372	S4_30621902	G/A	4	30621902	1.30491e-05	0.26087	184	0.0118261	0.122212	0.695797	PN	Group1	Stress_Y16
LOC_Os04g51690	NA	glycosyl hydrolase family 47 domain contain protein, expressed	4	30621160	30628372	S4_30622518	G/A	4	30622518	5.59318e-05	0.138587	184	0.0118261	0.105396	0.611951	PN	Group1	Stress_Y16
LOC_Os04g51690	NA	glycosyl hydrolase family 47 domain contain protein, expressed	4	30621160	30628372	S4_30622647	A/G	4	30622647	8.00657e-05	0.146739	184	0.0118261	0.10131	-0.604799	PN	Group1	Stress_Y16
LOC_Os04g51690	NA	glycosyl hydrolase family 47 domain contain protein, expressed	4	30621160	30628372	S4_30624598	A/C	4	30624598	3.83562e-05	0.144022	184	0.0118261	0.109717	0.645361	PN	Group1	Stress_Y16
LOC_Os04g51690	NA	glycosyl hydrolase family 47 domain contain protein, expressed	4	30621160	30628372	S4_30624599	C/G	4	30624599	8.25428e-05	0.152174	184	0.0118261	0.100964	0.64959	PN	Group1	Stress_Y16
LOC_Os04g51690	NA	glycosyl hydrolase family 47 domain contain protein, expressed	4	30621160	30628372	S4_30627822	T/C	4	30627822	5.24584e-05	0.141304	184	0.0118261	0.106128	-0.653391	PN	Group1	Stress_Y16
LOC_Os04g51690	NA	glycosyl hydrolase family 47 domain contain protein, expressed	4	30621160	30628372	S4_30628171	G/C	4	30628171	1.96007e-05	0.11413	184	0.0118261	0.117473	-0.452063	PN	Group1	Stress_Y16
LOC_Os04g51700	OsLig4|Lig4	DNA ligase I, ATP-dependent family protein, expressed	4	30629646	30638800	S4_30631385	A/T	4	30631385	1.31283e-05	0.222826	184	0.0118261	0.122142	-0.894692	PN	Group1	Stress_Y16
LOC_Os04g51760	NA	expressed protein	4	30671846	30673888	S4_30671977	A/G	4	30671977	2.5379e-05	0.111413	184	0.0118261	0.114479	0.653455	PN	Group1	Stress_Y16
LOC_Os04g51760	NA	expressed protein	4	30671846	30673888	S4_30672169	G/A	4	30672169	5.99778e-05	0.108696	184	0.0118261	0.104598	-0.764983	PN	Group1	Stress_Y16
LOC_Os04g51760	NA	expressed protein	4	30671846	30673888	S4_30672465	A/C	4	30672465	1.01764e-06	0.201087	184	0.0118261	0.152576	-0.697351	PN	Group1	Stress_Y16
LOC_Os04g51760	NA	expressed protein	4	30671846	30673888	S4_30672466	A/G	4	30672466	1.20142e-05	0.144022	184	0.0118261	0.123178	0.756296	PN	Group1	Stress_Y16
LOC_Os04g51760	NA	expressed protein	4	30671846	30673888	S4_30673437	A/G	4	30673437	2.0694e-05	0.203804	184	0.0118261	0.116843	-0.763789	PN	Group1	Stress_Y16
LOC_Os04g51760	NA	expressed protein	4	30671846	30673888	S4_30673529	T/G	4	30673529	1.22401e-05	0.192935	184	0.0118261	0.12296	0.637745	PN	Group1	Stress_Y16
LOC_Os04g51760	NA	expressed protein	4	30671846	30673888	S4_30673598	A/T	4	30673598	2.02993e-05	0.228261	184	0.0118261	0.117067	0.6986	PN	Group1	Stress_Y16
LOC_Os04g51770	NA	expressed protein	4	30678806	30681800	S4_30680573	A/G	4	30680573	2.5379e-05	0.111413	184	0.0118261	0.114479	-0.675236	PN	Group1	Stress_Y16
LOC_Os04g51780	NA	expressed protein	4	30682174	30685313	S4_30682954	G/A	4	30682954	2.86672e-05	0.108696	184	0.0118261	0.113071	-0.673459	PN	Group1	Stress_Y16
LOC_Os04g51792	NA	PAP fibrillin family domain containing protein, expressed	4	30688097	30689790	S4_30688750	C/A	4	30688750	1.63274e-05	0.11413	184	0.0118261	0.119598	NA	PN	Group1	Stress_Y16
LOC_Os04g51800	NA	MYB protein, putative, expressed	4	30702497	30710998	S4_30705926	A/C	4	30705926	6.49171e-05	0.146739	184	0.0118261	0.103696	-0.652008	PN	Group1	Stress_Y16
LOC_Os04g51800	NA	MYB protein, putative, expressed	4	30702497	30710998	S4_30706390	T/A	4	30706390	4.67345e-05	0.141304	184	0.0118261	0.107451	0.645823	PN	Group1	Stress_Y16
LOC_Os04g51809	NA	expressed protein	4	30716167	30722227	S4_30717034	A/G	4	30717034	5.42274e-05	0.13587	184	0.0118261	0.105749	-0.572728	PN	Group1	Stress_Y16
LOC_Os04g51809	NA	expressed protein	4	30716167	30722227	S4_30717256	C/T	4	30717256	4.14342e-05	0.130435	184	0.0118261	0.108831	0.656326	PN	Group1	Stress_Y16
LOC_Os04g51809	NA	expressed protein	4	30716167	30722227	S4_30717258	A/G	4	30717258	9.60607e-05	0.133152	184	0.0118261	0.0992451	-0.710768	PN	Group1	Stress_Y16
LOC_Os04g51809	NA	expressed protein	4	30716167	30722227	S4_30717380	G/C	4	30717380	6.38939e-05	0.17663	184	0.0118261	0.103877	-0.614953	PN	Group1	Stress_Y16
LOC_Os04g51809	NA	expressed protein	4	30716167	30722227	S4_30717520	G/A	4	30717520	5.27182e-05	0.138587	184	0.0118261	0.106072	0.631837	PN	Group1	Stress_Y16
LOC_Os04g51809	NA	expressed protein	4	30716167	30722227	S4_30717545	G/A	4	30717545	9.86777e-05	0.141304	184	0.0118261	0.0989408	-0.710268	PN	Group1	Stress_Y16
LOC_Os04g51809	NA	expressed protein	4	30716167	30722227	S4_30717698	T/C	4	30717698	7.11991e-05	0.138587	184	0.0118261	0.102644	0.614321	PN	Group1	Stress_Y16
LOC_Os04g51809	NA	expressed protein	4	30716167	30722227	S4_30717893	C/T	4	30717893	8.08931e-05	0.138587	184	0.0118261	0.101193	0.720894	PN	Group1	Stress_Y16
LOC_Os04g51809	NA	expressed protein	4	30716167	30722227	S4_30718059	A/G	4	30718059	8.21554e-05	0.138587	184	0.0118261	0.101018	-0.792033	PN	Group1	Stress_Y16
LOC_Os04g51809	NA	expressed protein	4	30716167	30722227	S4_30718070	T/C	4	30718070	5.20538e-05	0.138587	184	0.0118261	0.106217	0.78877	PN	Group1	Stress_Y16
LOC_Os04g51809	NA	expressed protein	4	30716167	30722227	S4_30718142	T/A	4	30718142	4.96452e-05	0.146739	184	0.0118261	0.106759	1.3058	PN	Group1	Stress_Y16
LOC_Os04g51809	NA	expressed protein	4	30716167	30722227	S4_30720069	C/T	4	30720069	4.87446e-05	0.133152	184	0.0118261	0.106968	0.749035	PN	Group1	Stress_Y16
LOC_Os04g51809	NA	expressed protein	4	30716167	30722227	S4_30721531	T/C	4	30721531	2.698e-05	0.144022	184	0.0118261	0.113772	-0.722833	PN	Group1	Stress_Y16
LOC_Os04g51809	NA	expressed protein	4	30716167	30722227	S4_30721537	A/G	4	30721537	1.34305e-05	0.138587	184	0.0118261	0.121876	0.650479	PN	Group1	Stress_Y16
LOC_Os04g51809	NA	expressed protein	4	30716167	30722227	S4_30721543	T/C	4	30721543	2.60574e-05	0.138587	184	0.0118261	0.114174	-0.757551	PN	Group1	Stress_Y16
LOC_Os04g51830	OsHKT1;4	OsHKT1;4 - Na+ transporter, expressed	4	30734183	30739334	S4_30734275	A/T	4	30734275	3.98194e-05	0.138587	184	0.0118261	0.109287	-0.743446	PN	Group1	Stress_Y16
LOC_Os04g51830	OsHKT1;4	OsHKT1;4 - Na+ transporter, expressed	4	30734183	30739334	S4_30736193	T/G	4	30736193	2.95317e-05	0.138587	184	0.0118261	0.112728	0.671564	PN	Group1	Stress_Y16
LOC_Os04g51830	OsHKT1;4	OsHKT1;4 - Na+ transporter, expressed	4	30734183	30739334	S4_30736574	C/T	4	30736574	4.28807e-05	0.133152	184	0.0118261	0.108437	-0.706559	PN	Group1	Stress_Y16
LOC_Os04g51830	OsHKT1;4	OsHKT1;4 - Na+ transporter, expressed	4	30734183	30739334	S4_30736617	T/C	4	30736617	1.55899e-05	0.130435	184	0.0118261	0.120136	-0.766516	PN	Group1	Stress_Y16
LOC_Os04g51830	OsHKT1;4	OsHKT1;4 - Na+ transporter, expressed	4	30734183	30739334	S4_30736845	C/A	4	30736845	2.81385e-05	0.13587	184	0.0118261	0.113286	0.794899	PN	Group1	Stress_Y16
LOC_Os04g51830	OsHKT1;4	OsHKT1;4 - Na+ transporter, expressed	4	30734183	30739334	S4_30736933	A/G	4	30736933	9.61657e-05	0.141304	184	0.0118261	0.0992327	0.689347	PN	Group1	Stress_Y16
LOC_Os04g51830	OsHKT1;4	OsHKT1;4 - Na+ transporter, expressed	4	30734183	30739334	S4_30737072	C/T	4	30737072	6.08293e-05	0.138587	184	0.0118261	0.104437	-0.718355	PN	Group1	Stress_Y16
LOC_Os04g51830	OsHKT1;4	OsHKT1;4 - Na+ transporter, expressed	4	30734183	30739334	S4_30737928	C/T	4	30737928	8.19599e-05	0.13587	184	0.0118261	0.101045	-0.738724	PN	Group1	Stress_Y16
LOC_Os04g51830	OsHKT1;4	OsHKT1;4 - Na+ transporter, expressed	4	30734183	30739334	S4_30737946	T/C	4	30737946	3.35564e-05	0.13587	184	0.0118261	0.111255	-0.722833	PN	Group1	Stress_Y16
LOC_Os04g51830	OsHKT1;4	OsHKT1;4 - Na+ transporter, expressed	4	30734183	30739334	S4_30738067	T/C	4	30738067	1.64648e-05	0.13587	184	0.0118261	0.1195	0.630982	PN	Group1	Stress_Y16
LOC_Os04g51830	OsHKT1;4	OsHKT1;4 - Na+ transporter, expressed	4	30734183	30739334	S4_30738092	A/G	4	30738092	5.91932e-05	0.149457	184	0.0118261	0.104749	-0.619021	PN	Group1	Stress_Y16
LOC_Os04g51850	NA	transposon protein, putative, CACTA, En/Spm sub-class	4	30748145	30749936	S4_30749536	C/T	4	30749536	2.69781e-05	0.0570652	184	0.0118261	0.113773	0.812947	PN	Group1	Stress_Y16
LOC_Os04g51930	NA	retrotransposon protein, putative, LINE subclass, expressed	4	30811261	30816943	S4_30812551	T/C	4	30812551	3.23041e-05	0.116848	184	0.0118261	0.111694	0.706999	PN	Group1	Stress_Y16
LOC_Os04g51930	NA	retrotransposon protein, putative, LINE subclass, expressed	4	30811261	30816943	S4_30813397	C/T	4	30813397	2.98069e-05	0.125	184	0.0118261	0.112621	-0.835399	PN	Group1	Stress_Y16
LOC_Os04g51930	NA	retrotransposon protein, putative, LINE subclass, expressed	4	30811261	30816943	S4_30813444	G/A	4	30813444	2.82095e-05	0.119565	184	0.0118261	0.113257	-0.972201	PN	Group1	Stress_Y16
LOC_Os04g51930	NA	retrotransposon protein, putative, LINE subclass, expressed	4	30811261	30816943	S4_30814058	G/A	4	30814058	4.11712e-05	0.127717	184	0.0118261	0.108904	0.715046	PN	Group1	Stress_Y16
LOC_Os04g52130	RLIN1	coproporphyrinogen III oxidase, chloroplast precursor, putative, expressed	4	30961604	30965503	S4_30962619	A/G	4	30962619	1.03857e-05	0.190217	184	0.0118261	0.124884	0.314993	PN	Group1	Stress_Y16
LOC_Os04g52140	OsCTR3	protein kinase domain containing protein, expressed	4	30974112	30979849	S4_30974542	C/T	4	30974542	9.76207e-05	0.168478	184	0.0118261	0.0990627	-0.429247	PN	Group1	Stress_Y16
LOC_Os04g52140	OsCTR3	protein kinase domain containing protein, expressed	4	30974112	30979849	S4_30975095	G/C	4	30975095	4.87157e-05	0.192935	184	0.0118261	0.106975	0.505989	PN	Group1	Stress_Y16
LOC_Os04g52140	OsCTR3	protein kinase domain containing protein, expressed	4	30974112	30979849	S4_30976306	G/A	4	30976306	7.3957e-05	0.171196	184	0.0118261	0.102212	0.506702	PN	Group1	Stress_Y16
LOC_Os04g52140	OsCTR3	protein kinase domain containing protein, expressed	4	30974112	30979849	S4_30978791	A/G	4	30978791	4.66371e-05	0.192935	184	0.0118261	0.107475	-0.608803	PN	Group1	Stress_Y16
LOC_Os04g52140	OsCTR3	protein kinase domain containing protein, expressed	4	30974112	30979849	S4_30979813	C/A	4	30979813	5.32236e-05	0.163043	184	0.0118261	0.105963	-0.451388	PN	Group1	Stress_Y16
LOC_Os04g52190	NA	vacuolar-sorting receptor precursor, putative, expressed	4	31003843	31008092	S4_31004468	C/G	4	31004468	4.38202e-06	0.241848	184	0.0118261	0.135065	-0.607254	PN	Group1	Stress_Y16
LOC_Os04g52190	NA	vacuolar-sorting receptor precursor, putative, expressed	4	31003843	31008092	S4_31005695	T/G	4	31005695	8.92632e-05	0.182065	184	0.0118261	0.100076	0.557712	PN	Group1	Stress_Y16
LOC_Os04g52200	NA	RNA recognition motif containing protein, putative, expressed	4	31007297	31013915	S4_31009177	A/T	4	31009177	6.31322e-05	0.184783	184	0.0118261	0.104014	0.709202	PN	Group1	Stress_Y16
LOC_Os04g52200	NA	RNA recognition motif containing protein, putative, expressed	4	31007297	31013915	S4_31013422	A/C	4	31013422	6.15627e-05	0.184783	184	0.0118261	0.104301	-0.760253	PN	Group1	Stress_Y16
LOC_Os04g52210	NA	terpene synthase, putative, expressed	4	31019367	31024260	S4_31024117	G/T	4	31024117	9.27008e-05	0.182065	184	0.0118261	0.0996483	-0.257338	PN	Group1	Stress_Y16
LOC_Os04g52230	OsKS1	ent-kaurene synthase, chloroplast precursor, putative, expressed	4	31026617	31031248	S4_31027329	A/G	4	31027329	3.74372e-05	0.182065	184	0.0118261	0.109996	0.208922	PN	Group1	Stress_Y16
LOC_Os04g52230	OsKS1	ent-kaurene synthase, chloroplast precursor, putative, expressed	4	31026617	31031248	S4_31029056	A/T	4	31029056	6.82405e-05	0.192935	184	0.0118261	0.103127	-0.256402	PN	Group1	Stress_Y16
LOC_Os04g52230	OsKS1	ent-kaurene synthase, chloroplast precursor, putative, expressed	4	31026617	31031248	S4_31029207	T/C	4	31029207	7.65166e-05	0.190217	184	0.0118261	0.101825	0.656581	PN	Group1	Stress_Y16
LOC_Os04g52230	OsKS1	ent-kaurene synthase, chloroplast precursor, putative, expressed	4	31026617	31031248	S4_31030699	G/A	4	31030699	3.11098e-05	0.190217	184	0.0118261	0.112128	-0.302578	PN	Group1	Stress_Y16
LOC_Os04g52230	OsKS1	ent-kaurene synthase, chloroplast precursor, putative, expressed	4	31026617	31031248	S4_31030709	A/G	4	31030709	6.68088e-05	0.182065	184	0.0118261	0.103369	-0.460353	PN	Group1	Stress_Y16
LOC_Os04g52240	KS2|OsKS2|OsKSL2	terpene synthase, putative, expressed	4	31035046	31043425	S4_31041948	C/T	4	31041948	8.82053e-05	0.195652	184	0.0118261	0.100212	1.43515	PN	Group1	Stress_Y16
LOC_Os04g52510	NA	glucosyltransferase, putative, expressed	4	31223396	31224544	S4_31224435	A/C	4	31224435	2.71884e-06	0.206522	184	0.0118261	0.14075	1.79986	PN	Group1	Stress_Y16
LOC_Os04g52510	NA	glucosyltransferase, putative, expressed	4	31223396	31224544	S4_31224498	A/G	4	31224498	7.32307e-06	0.201087	184	0.0118261	0.128991	1.79986	PN	Group1	Stress_Y16
LOC_Os04g52520	NA	APO, putative, expressed	4	31226016	31230567	S4_31227244	T/A	4	31227244	4.13047e-07	0.111413	184	0.0118261	0.163567	-0.219941	PN	Group1	Stress_Y16
LOC_Os04g52520	NA	APO, putative, expressed	4	31226016	31230567	S4_31228671	T/C	4	31228671	2.19351e-07	0.105978	184	0.0118261	0.171361	0.374864	PN	Group1	Stress_Y16
LOC_Os04g52520	NA	APO, putative, expressed	4	31226016	31230567	S4_31228676	T/C	4	31228676	2.19351e-07	0.105978	184	0.0118261	0.171361	1.8854	PN	Group1	Stress_Y16
LOC_Os04g52520	NA	APO, putative, expressed	4	31226016	31230567	S4_31228838	T/A	4	31228838	4.73256e-06	0.19837	184	0.0118261	0.134152	-1.80071	PN	Group1	Stress_Y16
LOC_Os04g52540	NA	retrotransposon protein, putative, unclassified, expressed	4	31239185	31243433	S4_31240137	C/T	4	31240137	1.47127e-07	0.111413	184	0.0118261	0.176312	-0.172616	PN	Group1	Stress_Y16
LOC_Os04g52550	NA	PAZ domain-containing protein, putative, expressed	4	31244448	31249676	S4_31246497	C/T	4	31246497	4.13047e-07	0.111413	184	0.0118261	0.163567	0.535162	PN	Group1	Stress_Y16
LOC_Os04g53510	NA	OsFBL20 - F-box domain and LRR containing protein, expressed	4	31875725	31879749	S4_31875967	T/C	4	31875967	3.62655e-05	0.345455	330	0.0572766	0.108	-1.26683	FGN	Group2	Stress_Y16
LOC_Os04g53510	NA	OsFBL20 - F-box domain and LRR containing protein, expressed	4	31875725	31879749	S4_31875967	T/C	4	31875967	3.18978e-05	0.343849	317	0.046649	0.100923	1.28341	SSR	Group2	Stress_Y16
LOC_Os05g05920	NA	desiccation-related protein PCC13-62 precursor, putative, expressed	5	2967576	2968672	S5_2967728	G/T	5	2967728	5.46462e-05	0.104816	353	0.204667	0.242704	-1.57929	TSN	Group2	Stress_Y16
LOC_Os05g11300	NA	expressed protein	5	6380147	6380983	S5_6380506	T/G	5	6380506	2.2733e-05	0.0512195	205	0.076618	0.163094	-1.76038	FGN	Group1	Stress_Y16
LOC_Os05g28560	NA	retrotransposon protein, putative, unclassified, expressed	5	16727981	16730840	S5_16729681	A/G	5	16729681	4.22992e-05	0.255385	325	0.0606353	0.111085	-0.368435	PN	Group2	Stress_Y16
LOC_Os05g29710	NA	RING-H2 finger protein, putative, expressed	5	17175702	17177087	S5_17177005	A/C	5	17177005	9.31491e-05	0.115152	330	0.0572766	0.102561	-3.11269	FGN	Group2	Stress_Y16
LOC_Os05g29730	NA	retrotransposon protein, putative, unclassified, expressed	5	17194534	17195602	S5_17194798	A/G	5	17194798	6.31855e-05	0.118182	330	0.0572766	0.104792	-13.5521	FGN	Group2	Stress_Y16
LOC_Os05g29730	NA	retrotransposon protein, putative, unclassified, expressed	5	17194534	17195602	S5_17195102	T/C	5	17195102	2.9181e-05	0.128788	330	0.0572766	0.109262	0.996543	FGN	Group2	Stress_Y16
LOC_Os05g29730	NA	retrotransposon protein, putative, unclassified, expressed	5	17194534	17195602	S5_17195249	T/A	5	17195249	3.97638e-05	0.322727	330	0.0572766	0.107467	-0.509883	FGN	Group2	Stress_Y16
LOC_Os05g29730	NA	retrotransposon protein, putative, unclassified, expressed	5	17194534	17195602	S5_17195379	A/G	5	17195379	2.61557e-05	0.156061	330	0.0572766	0.109898	-0.384092	FGN	Group2	Stress_Y16
LOC_Os05g29750	NA	cytochrome P450 71E1, putative, expressed	5	17202440	17204248	S5_17203375	T/C	5	17203375	4.69433e-05	0.101515	330	0.0572766	0.106506	-1.25561	FGN	Group2	Stress_Y16
LOC_Os05g29750	NA	cytochrome P450 71E1, putative, expressed	5	17202440	17204248	S5_17204248	T/C	5	17204248	5.00027e-05	0.107576	330	0.0572766	0.106142	2.87377	FGN	Group2	Stress_Y16
LOC_Os05g29760	NA	ferrochelatase-2, chloroplast precursor, putative, expressed	5	17209580	17216776	S5_17209889	C/T	5	17209889	7.61769e-05	0.127273	330	0.0572766	0.103716	-23.3235	FGN	Group2	Stress_Y16
LOC_Os05g29760	NA	ferrochelatase-2, chloroplast precursor, putative, expressed	5	17209580	17216776	S5_17210022	C/G	5	17210022	3.66786e-05	0.1	330	0.0572766	0.107935	-1.56349	FGN	Group2	Stress_Y16
LOC_Os05g29760	NA	ferrochelatase-2, chloroplast precursor, putative, expressed	5	17209580	17216776	S5_17210330	A/T	5	17210330	4.37792e-06	0.113636	330	0.0572766	0.120392	-1.22876	FGN	Group2	Stress_Y16
LOC_Os05g29770	NA	expressed protein	5	17216829	17220202	S5_17217077	T/C	5	17217077	2.3502e-05	0.113636	330	0.0572766	0.110521	-2.43788	FGN	Group2	Stress_Y16
LOC_Os05g29770	NA	expressed protein	5	17216829	17220202	S5_17217362	T/C	5	17217362	1.61152e-05	0.116667	330	0.0572766	0.112723	-0.233381	FGN	Group2	Stress_Y16
LOC_Os05g29770	NA	expressed protein	5	17216829	17220202	S5_17217649	A/G	5	17217649	2.26606e-05	0.115152	330	0.0572766	0.110733	1.01396	FGN	Group2	Stress_Y16
LOC_Os05g29770	NA	expressed protein	5	17216829	17220202	S5_17217790	T/C	5	17217790	1.62039e-05	0.112121	330	0.0572766	0.11269	1.30731	FGN	Group2	Stress_Y16
LOC_Os05g29770	NA	expressed protein	5	17216829	17220202	S5_17217941	T/C	5	17217941	2.96954e-05	0.110606	330	0.0572766	0.10916	-1.80613	FGN	Group2	Stress_Y16
LOC_Os05g29770	NA	expressed protein	5	17216829	17220202	S5_17218038	G/C	5	17218038	5.76711e-05	0.116667	330	0.0572766	0.105318	1.53595	FGN	Group2	Stress_Y16
LOC_Os05g29770	NA	expressed protein	5	17216829	17220202	S5_17218109	T/C	5	17218109	6.05686e-05	0.118182	330	0.0572766	0.105036	-6.01418	FGN	Group2	Stress_Y16
LOC_Os05g29770	NA	expressed protein	5	17216829	17220202	S5_17218120	T/C	5	17218120	7.83447e-05	0.101515	330	0.0572766	0.103555	-1.31212	FGN	Group2	Stress_Y16
LOC_Os05g29770	NA	expressed protein	5	17216829	17220202	S5_17218215	T/C	5	17218215	7.02108e-05	0.118182	330	0.0572766	0.104185	1.56894	FGN	Group2	Stress_Y16
LOC_Os05g29770	NA	expressed protein	5	17216829	17220202	S5_17218432	T/C	5	17218432	9.22362e-05	0.128788	330	0.0572766	0.102618	-2.58157	FGN	Group2	Stress_Y16
LOC_Os05g29770	NA	expressed protein	5	17216829	17220202	S5_17218640	A/T	5	17218640	2.94317e-05	0.119697	330	0.0572766	0.109212	1.2663	FGN	Group2	Stress_Y16
LOC_Os05g29770	NA	expressed protein	5	17216829	17220202	S5_17218757	A/G	5	17218757	1.41034e-05	0.107576	330	0.0572766	0.113503	-6.98075	FGN	Group2	Stress_Y16
LOC_Os05g29770	NA	expressed protein	5	17216829	17220202	S5_17219222	A/G	5	17219222	1.76145e-05	0.118182	330	0.0572766	0.112203	-1.47581	FGN	Group2	Stress_Y16
LOC_Os05g29770	NA	expressed protein	5	17216829	17220202	S5_17219954	T/C	5	17219954	3.14271e-05	0.119697	330	0.0572766	0.108831	0.00198532	FGN	Group2	Stress_Y16
LOC_Os05g30060	NA	retrotransposon protein, putative, unclassified, expressed	5	17390048	17392688	S5_17390298	C/T	5	17390298	5.11461e-05	0.0523077	325	0.0606353	0.109973	-0.323118	PN	Group2	Stress_Y16
LOC_Os05g30280	NA	Os5bglu20 - beta-glucosidase homologue, similar to G. max isohydroxyurate hydrolase, expressed	5	17547345	17552419	S5_17548853	C/T	5	17548853	1.44344e-05	0.136923	325	0.0606353	0.117424	-1.07161	PN	Group2	Stress_Y16
LOC_Os05g30440	NA	expressed protein	5	17641507	17642160	S5_17642094	T/C	5	17642094	9.84337e-05	0.121538	325	0.0606353	0.106159	0.39525	PN	Group2	Stress_Y16
LOC_Os05g30490	NA	harpin-induced protein 1 domain containing protein, expressed	5	17664455	17665237	S5_17665042	G/C	5	17665042	5.76104e-05	0.203077	325	0.0606353	0.109278	0.471079	PN	Group2	Stress_Y16
LOC_Os05g30790	NA	CW-type Zinc Finger, putative, expressed	5	17856296	17865189	S5_17862842	C/T	5	17862842	4.34205e-05	0.0569231	325	0.0606353	0.110932	0.518685	PN	Group2	Stress_Y16
LOC_Os05g30990	NA	zinc finger protein, putative, expressed	5	18003906	18007099	S5_18004131	T/C	5	18004131	2.5778e-05	0.127692	325	0.0606353	0.113996	0.0917197	PN	Group2	Stress_Y16
LOC_Os05g31310	NA	expressed protein	5	18200747	18201228	S5_18201078	T/C	5	18201078	8.56452e-05	0.234899	298	0.0223987	0.075171	-0.922719	GY	Group2	Stress_Y16
LOC_Os05g31320	NA	expressed protein	5	18203074	18205659	S5_18203361	A/G	5	18203361	5.4488e-05	0.355705	298	0.0223987	0.0781803	0.17686	GY	Group2	Stress_Y16
LOC_Os05g31320	NA	expressed protein	5	18203074	18205659	S5_18204762	A/G	5	18204762	3.80857e-05	0.39094	298	0.0223987	0.0805752	0.199659	GY	Group2	Stress_Y16
LOC_Os05g31320	NA	expressed protein	5	18203074	18205659	S5_18205619	G/A	5	18205619	8.82883e-05	0.236577	298	0.0223987	0.0749694	-0.156486	GY	Group2	Stress_Y16
LOC_Os05g31400	NA	retrotransposon protein, putative, unclassified, expressed	5	18258197	18261854	S5_18261300	A/G	5	18261300	9.64515e-05	0.243289	298	0.0223987	0.0743831	-0.0736154	GY	Group2	Stress_Y16
LOC_Os05g31410	NA	retrotransposon protein, putative, unclassified, expressed	5	18264107	18265637	S5_18264243	A/G	5	18264243	8.88677e-05	0.241611	298	0.0223987	0.074926	0.185855	GY	Group2	Stress_Y16
LOC_Os05g31410	NA	retrotransposon protein, putative, unclassified, expressed	5	18264107	18265637	S5_18265154	A/G	5	18265154	5.3244e-05	0.241611	298	0.0223987	0.0783344	NA	GY	Group2	Stress_Y16
LOC_Os05g31410	NA	retrotransposon protein, putative, unclassified, expressed	5	18264107	18265637	S5_18265617	T/C	5	18265617	7.24183e-05	0.357383	298	0.0223987	0.0762853	0.184049	GY	Group2	Stress_Y16
LOC_Os05g31420	NA	GRAS family transcription factor containing protein, expressed	5	18275763	18277445	S5_18275786	T/C	5	18275786	9.87223e-05	0.246644	298	0.0223987	0.074229	0.65118	GY	Group2	Stress_Y16
LOC_Os05g31450	NA	retrotransposon protein, putative, unclassified	5	18291424	18292438	S5_18292020	A/T	5	18292020	4.50519e-05	0.236577	298	0.0223987	0.0794506	0.100709	GY	Group2	Stress_Y16
LOC_Os05g40160	NA	NB-ARC domain containing protein, expressed	5	23586768	23590400	S5_23587723	T/C	5	23587723	2.13099e-05	0.0788043	184	0.0118261	0.116503	-0.730555	PN	Group1	Stress_Y16
LOC_Os05g40160	NA	NB-ARC domain containing protein, expressed	5	23586768	23590400	S5_23589268	T/G	5	23589268	4.20776e-05	0.0516304	184	0.0118261	0.108654	-0.419576	PN	Group1	Stress_Y16
LOC_Os05g40240	NA	expressed protein	5	23635727	23637842	S5_23637289	G/A	5	23637289	7.73144e-05	0.354545	220	0.0298025	0.102762	0.118403	TGW	Group2	Stress_Y16
LOC_Os05g40250	NA	expressed protein	5	23640200	23641733	S5_23640527	A/C	5	23640527	6.68422e-05	0.352273	220	0.0298025	0.104096	NA	TGW	Group2	Stress_Y16
LOC_Os05g40250	NA	expressed protein	5	23640200	23641733	S5_23640882	T/G	5	23640882	6.39449e-05	0.347727	220	0.0298025	0.104503	-0.0428565	TGW	Group2	Stress_Y16
LOC_Os05g40500	NA	F-box domain containing protein, expressed	5	23783787	23787925	S5_23784845	A/C	5	23784845	5.92252e-05	0.470455	220	0.0298025	0.105207	0.15498	TGW	Group2	Stress_Y16
LOC_Os05g40510	NA	expressed protein	5	23788811	23790004	S5_23789026	C/A	5	23789026	8.59479e-05	0.470455	220	0.0298025	0.101793	-0.512276	TGW	Group2	Stress_Y16
LOC_Os05g40520	NA	OsFBT8 - F-box and tubby domain containing protein, expressed	5	23792979	23794190	S5_23793698	G/C	5	23793698	6.35477e-05	0.352273	220	0.0298025	0.10456	-0.251103	TGW	Group2	Stress_Y16
LOC_Os05g43400	NA	expressed protein	5	25235840	25237695	S5_25237148	C/A	5	25237148	2.38469e-06	0.0625	184	0.0118261	0.142319	-0.40868	PN	Group1	Stress_Y16
LOC_Os05g45150	NA	anthocyanidin 5,3-O-glucosyltransferase, putative, expressed	5	26215283	26218140	S5_26216261	C/T	5	26216261	3.07853e-05	0.100543	184	0.0118261	0.112249	0.946029	PN	Group1	Stress_Y16
LOC_Os06g03220	NA	expressed protein	6	1218464	1219977	S6_1218616	C/T	6	1218616	5.84896e-05	0.135385	325	0.0606353	0.109189	-0.482982	PN	Group2	Stress_Y16
LOC_Os06g03240	Bph32	expressed protein	6	1223060	1223644	S6_1223600	C/G	6	1223600	3.02762e-06	0.152308	325	0.0606353	0.126756	1.11824	PN	Group2	Stress_Y16
LOC_Os06g03380	NA	expressed protein	6	1289047	1291621	S6_1289506	T/G	6	1289506	7.93589e-05	0.0953846	325	0.0606353	0.107411	1.02606	PN	Group2	Stress_Y16
LOC_Os06g03380	NA	expressed protein	6	1289047	1291621	S6_1290357	G/A	6	1290357	6.24e-05	0.0938462	325	0.0606353	0.108812	0.809214	PN	Group2	Stress_Y16
LOC_Os06g03380	NA	expressed protein	6	1289047	1291621	S6_1290393	C/T	6	1290393	7.93589e-05	0.0953846	325	0.0606353	0.107411	-0.530205	PN	Group2	Stress_Y16
LOC_Os06g03380	NA	expressed protein	6	1289047	1291621	S6_1290400	C/G	6	1290400	7.93589e-05	0.0953846	325	0.0606353	0.107411	-1.62603	PN	Group2	Stress_Y16
LOC_Os06g03380	NA	expressed protein	6	1289047	1291621	S6_1290401	A/T	6	1290401	7.93589e-05	0.0953846	325	0.0606353	0.107411	-0.476238	PN	Group2	Stress_Y16
LOC_Os06g03380	NA	expressed protein	6	1289047	1291621	S6_1290425	T/G	6	1290425	7.93589e-05	0.0953846	325	0.0606353	0.107411	-0.426899	PN	Group2	Stress_Y16
LOC_Os06g03500	NA	NBS-LRR disease resistance protein, putative, expressed	6	1347280	1351183	S6_1347921	G/A	6	1347921	2.4212e-05	0.204615	325	0.0606353	0.114365	0.0590268	PN	Group2	Stress_Y16
LOC_Os06g03500	NA	NBS-LRR disease resistance protein, putative, expressed	6	1347280	1351183	S6_1347924	G/A	6	1347924	5.31444e-06	0.201538	325	0.0606353	0.123378	-0.417703	PN	Group2	Stress_Y16
LOC_Os06g03540	NA	oligopeptide transporter, putative, expressed	6	1364906	1369008	S6_1365020	T/G	6	1365020	9.0023e-06	0.0923077	325	0.0606353	0.12023	0.568032	PN	Group2	Stress_Y16
LOC_Os06g03540	NA	oligopeptide transporter, putative, expressed	6	1364906	1369008	S6_1366197	A/T	6	1366197	1.83835e-05	0.0907692	325	0.0606353	0.115992	0.320898	PN	Group2	Stress_Y16
LOC_Os06g03540	NA	oligopeptide transporter, putative, expressed	6	1364906	1369008	S6_1368400	C/G	6	1368400	2.69215e-07	0.155385	325	0.0606353	0.141485	0.448352	PN	Group2	Stress_Y16
LOC_Os06g03550	NA	hypothetical protein	6	1370306	1370863	S6_1370508	T/C	6	1370508	5.5749e-06	0.150769	325	0.0606353	0.123091	0.254856	PN	Group2	Stress_Y16
LOC_Os06g03600	NA	transcriptional corepressor SEUSS, putative, expressed	6	1389013	1395804	S6_1389763	T/G	6	1389763	6.2706e-05	0.423077	325	0.0606353	0.108783	-0.0502639	PN	Group2	Stress_Y16
LOC_Os06g03600	NA	transcriptional corepressor SEUSS, putative, expressed	6	1389013	1395804	S6_1390282	C/T	6	1390282	2.84773e-05	0.423077	325	0.0606353	0.113409	-0.163666	PN	Group2	Stress_Y16
LOC_Os06g03600	NA	transcriptional corepressor SEUSS, putative, expressed	6	1389013	1395804	S6_1390338	G/T	6	1390338	3.56851e-06	0.203077	325	0.0606353	0.125767	-0.873569	PN	Group2	Stress_Y16
LOC_Os06g03600	NA	transcriptional corepressor SEUSS, putative, expressed	6	1389013	1395804	S6_1391691	T/A	6	1391691	1.52422e-06	0.206154	325	0.0606353	0.130901	0.399968	PN	Group2	Stress_Y16
LOC_Os06g03600	NA	transcriptional corepressor SEUSS, putative, expressed	6	1389013	1395804	S6_1394307	T/G	6	1394307	5.73517e-05	0.429231	325	0.0606353	0.109304	0.382294	PN	Group2	Stress_Y16
LOC_Os06g03600	NA	transcriptional corepressor SEUSS, putative, expressed	6	1389013	1395804	S6_1395038	G/C	6	1395038	6.42896e-05	0.204615	325	0.0606353	0.108638	0.961049	PN	Group2	Stress_Y16
LOC_Os06g03610	RUPO	TKL_IRAK_CrRLK1L-1.13 - The CrRLK1L-1 subfamily has homology to the CrRLK1L homolog, expressed	6	1397921	1400968	S6_1398815	T/C	6	1398815	2.17828e-05	0.103077	325	0.0606353	0.114989	0.898655	PN	Group2	Stress_Y16
LOC_Os06g03640	NA	BAG domain containing protein, expressed	6	1414221	1416618	S6_1415474	T/A	6	1415474	1.71049e-05	0.0938462	325	0.0606353	0.116418	0.287655	PN	Group2	Stress_Y16
LOC_Os06g03660	NA	peroxisomal biogenesis factor 11, putative, expressed	6	1423797	1427678	S6_1423985	C/T	6	1423985	1.50967e-05	0.0984615	325	0.0606353	0.117158	-0.833413	PN	Group2	Stress_Y16
LOC_Os06g03660	NA	peroxisomal biogenesis factor 11, putative, expressed	6	1423797	1427678	S6_1424606	A/G	6	1424606	8.86061e-05	0.0907692	325	0.0606353	0.10677	0.36982	PN	Group2	Stress_Y16
LOC_Os06g03682	NA	calcium-dependent protein kinase isoform AK1, putative, expressed	6	1445507	1448681	S6_1446148	A/G	6	1446148	4.49462e-05	0.203077	325	0.0606353	0.11073	-0.749016	PN	Group2	Stress_Y16
LOC_Os06g03682	NA	calcium-dependent protein kinase isoform AK1, putative, expressed	6	1445507	1448681	S6_1446275	A/G	6	1446275	1.48352e-05	0.421538	325	0.0606353	0.117261	0.115632	PN	Group2	Stress_Y16
LOC_Os06g03682	NA	calcium-dependent protein kinase isoform AK1, putative, expressed	6	1445507	1448681	S6_1446723	C/G	6	1446723	1.16025e-05	0.201538	325	0.0606353	0.11872	-1.43091	PN	Group2	Stress_Y16
LOC_Os06g03682	NA	calcium-dependent protein kinase isoform AK1, putative, expressed	6	1445507	1448681	S6_1446962	G/C	6	1446962	3.22098e-05	0.203077	325	0.0606353	0.112685	1.21938	PN	Group2	Stress_Y16
LOC_Os06g03682	NA	calcium-dependent protein kinase isoform AK1, putative, expressed	6	1445507	1448681	S6_1447352	A/G	6	1447352	3.62458e-05	0.203077	325	0.0606353	0.111991	0.438745	PN	Group2	Stress_Y16
LOC_Os06g03682	NA	calcium-dependent protein kinase isoform AK1, putative, expressed	6	1445507	1448681	S6_1447582	A/C	6	1447582	2.2389e-05	0.207692	325	0.0606353	0.114827	-0.977547	PN	Group2	Stress_Y16
LOC_Os06g03682	NA	calcium-dependent protein kinase isoform AK1, putative, expressed	6	1445507	1448681	S6_1447676	T/G	6	1447676	1.87281e-06	0.418462	325	0.0606353	0.129655	-0.900234	PN	Group2	Stress_Y16
LOC_Os06g03682	NA	calcium-dependent protein kinase isoform AK1, putative, expressed	6	1445507	1448681	S6_1447816	A/C	6	1447816	4.24282e-05	0.203077	325	0.0606353	0.111067	-1.32345	PN	Group2	Stress_Y16
LOC_Os06g03682	NA	calcium-dependent protein kinase isoform AK1, putative, expressed	6	1445507	1448681	S6_1448669	C/T	6	1448669	8.03014e-05	0.215385	325	0.0606353	0.107342	0.57498	PN	Group2	Stress_Y16
LOC_Os06g03710	DLT|OsGRAS-32|D62|GS6|SMOS2	DELLA protein SLR1, putative, expressed	6	1465499	1468600	S6_1468094	T/A	6	1468094	1.93671e-05	0.423077	325	0.0606353	0.115683	0.190317	PN	Group2	Stress_Y16
LOC_Os06g03750	NA	dehydration response related protein, putative, expressed	6	1478931	1485780	S6_1481386	C/T	6	1481386	7.55663e-06	0.252308	325	0.0606353	0.121274	1.11088	PN	Group2	Stress_Y16
LOC_Os06g03800	NA	pollen ankyrin, putative, expressed	6	1520743	1526081	S6_1521618	T/G	6	1521618	6.28821e-05	0.241602	387	0.00708178	0.0495362	0.230612	SN	Group2	Stress_Y16
LOC_Os06g03840	NA	H-BTB4 - Bric-a-Brac, Tramtrack, Broad Complex BTB domain with H family conserved sequence, expressed	6	1544044	1546216	S6_1545234	C/G	6	1545234	9.2376e-05	0.135385	325	0.0606353	0.106528	0.397922	PN	Group2	Stress_Y16
LOC_Os06g06550	NA	plant protein of unknown function domain containing protein, expressed	6	3074186	3077781	S6_3075718	T/C	6	3075718	2.54086e-05	0.365439	353	0.204667	0.246188	2.90013	TSN	Group2	Stress_Y16
LOC_Os06g37640	NA	expressed protein	6	22292246	22301030	S6_22300741	T/C	6	22300741	9.24468e-05	0.113636	330	0.0572766	0.102605	1.23992	FGN	Group2	Stress_Y16
LOC_Os06g37700	NA	expressed protein	6	22336716	22337519	S6_22337130	T/C	6	22337130	5.58746e-05	0.115152	330	0.0572766	0.105501	-2.66536	FGN	Group2	Stress_Y16
LOC_Os06g37700	NA	expressed protein	6	22336716	22337519	S6_22337450	G/C	6	22337450	8.54897e-05	0.119697	330	0.0572766	0.103053	1.35764	FGN	Group2	Stress_Y16
LOC_Os06g37750	NA	S-locus-like receptor protein kinase, putative, expressed	6	22352080	22354770	S6_22352580	C/T	6	22352580	3.99206e-05	0.133333	330	0.0572766	0.107444	3.1692	FGN	Group2	Stress_Y16
LOC_Os06g37750	NA	S-locus-like receptor protein kinase, putative, expressed	6	22352080	22354770	S6_22352780	G/A	6	22352780	3.36825e-05	0.0984848	330	0.0572766	0.108429	-2.84567	FGN	Group2	Stress_Y16
LOC_Os06g37750	NA	S-locus-like receptor protein kinase, putative, expressed	6	22352080	22354770	S6_22353389	T/C	6	22353389	4.44664e-06	0.104545	330	0.0572766	0.1203	1.32506	FGN	Group2	Stress_Y16
LOC_Os06g37750	NA	S-locus-like receptor protein kinase, putative, expressed	6	22352080	22354770	S6_22353518	C/G	6	22353518	4.28866e-06	0.116667	330	0.0572766	0.120514	-2.41552	FGN	Group2	Stress_Y16
LOC_Os06g37750	NA	S-locus-like receptor protein kinase, putative, expressed	6	22352080	22354770	S6_22353838	C/G	6	22353838	1.18064e-05	0.104545	330	0.0572766	0.114545	-1.22057	FGN	Group2	Stress_Y16
LOC_Os06g37750	NA	S-locus-like receptor protein kinase, putative, expressed	6	22352080	22354770	S6_22354169	C/A	6	22354169	3.72375e-06	0.104545	330	0.0572766	0.121351	2.4012	FGN	Group2	Stress_Y16
LOC_Os06g37750	NA	S-locus-like receptor protein kinase, putative, expressed	6	22352080	22354770	S6_22354169	C/A	6	22354169	4.45971e-05	0.102524	317	0.046649	0.0988735	1.04014	SSR	Group2	Stress_Y16
LOC_Os06g37750	NA	S-locus-like receptor protein kinase, putative, expressed	6	22352080	22354770	S6_22354379	A/C	6	22354379	8.24163e-06	0.116667	330	0.0572766	0.116657	-2.04501	FGN	Group2	Stress_Y16
LOC_Os06g37750	NA	S-locus-like receptor protein kinase, putative, expressed	6	22352080	22354770	S6_22354379	A/C	6	22354379	6.48287e-05	0.115142	317	0.046649	0.0965947	-1.93093	SSR	Group2	Stress_Y16
LOC_Os06g37750	NA	S-locus-like receptor protein kinase, putative, expressed	6	22352080	22354770	S6_22354500	T/C	6	22354500	1.95322e-05	0.1	330	0.0572766	0.111599	1.95822	FGN	Group2	Stress_Y16
LOC_Os06g37750	NA	S-locus-like receptor protein kinase, putative, expressed	6	22352080	22354770	S6_22354603	A/C	6	22354603	3.41468e-05	0.106061	330	0.0572766	0.108349	-1.09473	FGN	Group2	Stress_Y16
LOC_Os06g37760	NA	transposon protein, putative, unclassified, expressed	6	22356357	22360550	S6_22359593	C/A	6	22359593	1.00337e-05	0.112121	330	0.0572766	0.1155	-1.50026	FGN	Group2	Stress_Y16
LOC_Os06g37760	NA	transposon protein, putative, unclassified, expressed	6	22356357	22360550	S6_22359666	C/T	6	22359666	6.98898e-05	0.154545	330	0.0572766	0.104211	-2.57979	FGN	Group2	Stress_Y16
LOC_Os06g37760	NA	transposon protein, putative, unclassified, expressed	6	22356357	22360550	S6_22359749	C/T	6	22359749	3.97315e-05	0.231818	330	0.0572766	0.107471	-0.850447	FGN	Group2	Stress_Y16
LOC_Os06g37760	NA	transposon protein, putative, unclassified, expressed	6	22356357	22360550	S6_22360400	T/C	6	22360400	9.78834e-05	0.154545	330	0.0572766	0.102277	-3.01625	FGN	Group2	Stress_Y16
LOC_Os06g37760	NA	transposon protein, putative, unclassified, expressed	6	22356357	22360550	S6_22360458	A/G	6	22360458	6.70204e-05	0.113636	330	0.0572766	0.104453	1.86409	FGN	Group2	Stress_Y16
LOC_Os06g37770	NA	expressed protein	6	22361233	22361673	S6_22361366	C/T	6	22361366	4.84737e-05	0.142424	330	0.0572766	0.106321	2.19637	FGN	Group2	Stress_Y16
LOC_Os06g37770	NA	expressed protein	6	22361233	22361673	S6_22361388	T/C	6	22361388	2.96238e-05	0.104545	330	0.0572766	0.109174	-3.38037	FGN	Group2	Stress_Y16
LOC_Os06g37770	NA	expressed protein	6	22361233	22361673	S6_22361392	G/A	6	22361392	6.27772e-05	0.143533	317	0.046649	0.0967902	1.20788	SSR	Group2	Stress_Y16
LOC_Os06g37770	NA	expressed protein	6	22361233	22361673	S6_22361392	G/A	6	22361392	9.2626e-06	0.148485	330	0.0572766	0.11597	3.46523	FGN	Group2	Stress_Y16
LOC_Os06g37780	NA	hypothetical protein	6	22362321	22362710	S6_22362601	A/G	6	22362601	6.45041e-05	0.121212	330	0.0572766	0.104673	3.92215	FGN	Group2	Stress_Y16
LOC_Os06g37790	NA	expressed protein	6	22364633	22367812	S6_22364717	T/C	6	22364717	7.65549e-06	0.121212	330	0.0572766	0.117091	-0.980848	FGN	Group2	Stress_Y16
LOC_Os06g37790	NA	expressed protein	6	22364633	22367812	S6_22364884	A/G	6	22364884	1.44161e-05	0.112121	330	0.0572766	0.113374	13.0308	FGN	Group2	Stress_Y16
LOC_Os06g37790	NA	expressed protein	6	22364633	22367812	S6_22364948	G/C	6	22364948	3.82255e-06	0.113636	330	0.0572766	0.121196	1.408	FGN	Group2	Stress_Y16
LOC_Os06g37790	NA	expressed protein	6	22364633	22367812	S6_22364964	T/G	6	22364964	2.11492e-06	0.116667	330	0.0572766	0.124716	-1.19844	FGN	Group2	Stress_Y16
LOC_Os06g37790	NA	expressed protein	6	22364633	22367812	S6_22365049	T/C	6	22365049	3.6475e-06	0.115152	330	0.0572766	0.121474	-1.30399	FGN	Group2	Stress_Y16
LOC_Os06g37790	NA	expressed protein	6	22364633	22367812	S6_22365119	T/C	6	22365119	7.82156e-06	0.110606	330	0.0572766	0.116965	2.04365	FGN	Group2	Stress_Y16
LOC_Os06g37790	NA	expressed protein	6	22364633	22367812	S6_22365156	T/C	6	22365156	9.14318e-06	0.134848	330	0.0572766	0.116046	1.8581	FGN	Group2	Stress_Y16
LOC_Os06g37790	NA	expressed protein	6	22364633	22367812	S6_22365285	T/A	6	22365285	1.40338e-05	0.113636	330	0.0572766	0.113532	2.00716	FGN	Group2	Stress_Y16
LOC_Os06g37790	NA	expressed protein	6	22364633	22367812	S6_22365415	T/C	6	22365415	3.29495e-05	0.139394	330	0.0572766	0.108556	-1.83523	FGN	Group2	Stress_Y16
LOC_Os06g37790	NA	expressed protein	6	22364633	22367812	S6_22365419	A/G	6	22365419	2.6015e-06	0.118182	330	0.0572766	0.123482	1.99855	FGN	Group2	Stress_Y16
LOC_Os06g37790	NA	expressed protein	6	22364633	22367812	S6_22365465	A/C	6	22365465	7.20015e-07	0.122727	330	0.0572766	0.131171	2.49974	FGN	Group2	Stress_Y16
LOC_Os06g37790	NA	expressed protein	6	22364633	22367812	S6_22365465	A/C	6	22365465	4.98186e-05	0.116719	317	0.046649	0.098198	1.50527	SSR	Group2	Stress_Y16
LOC_Os06g37790	NA	expressed protein	6	22364633	22367812	S6_22365516	A/G	6	22365516	8.97945e-06	0.106061	330	0.0572766	0.116152	-2.13533	FGN	Group2	Stress_Y16
LOC_Os06g37790	NA	expressed protein	6	22364633	22367812	S6_22366075	T/C	6	22366075	2.36269e-05	0.119697	330	0.0572766	0.11049	-0.777424	FGN	Group2	Stress_Y16
LOC_Os06g37790	NA	expressed protein	6	22364633	22367812	S6_22366686	A/G	6	22366686	2.32934e-05	0.0909091	330	0.0572766	0.110573	-1.89837	FGN	Group2	Stress_Y16
LOC_Os06g37790	NA	expressed protein	6	22364633	22367812	S6_22366864	A/C	6	22366864	2.8559e-05	0.112121	330	0.0572766	0.109387	-1.82737	FGN	Group2	Stress_Y16
LOC_Os06g37790	NA	expressed protein	6	22364633	22367812	S6_22366894	G/A	6	22366894	9.04705e-05	0.137879	330	0.0572766	0.102729	-0.327623	FGN	Group2	Stress_Y16
LOC_Os06g37790	NA	expressed protein	6	22364633	22367812	S6_22367241	A/G	6	22367241	3.09538e-05	0.115152	330	0.0572766	0.108919	2.4225	FGN	Group2	Stress_Y16
LOC_Os06g37790	NA	expressed protein	6	22364633	22367812	S6_22367256	T/C	6	22367256	2.95801e-05	0.112121	330	0.0572766	0.109183	1.95622	FGN	Group2	Stress_Y16
LOC_Os06g37790	NA	expressed protein	6	22364633	22367812	S6_22367337	A/G	6	22367337	1.65742e-05	0.118182	330	0.0572766	0.112558	-1.46651	FGN	Group2	Stress_Y16
LOC_Os06g37790	NA	expressed protein	6	22364633	22367812	S6_22367392	G/A	6	22367392	8.47939e-05	0.139394	330	0.0572766	0.1031	-1.9171	FGN	Group2	Stress_Y16
LOC_Os06g37790	NA	expressed protein	6	22364633	22367812	S6_22367420	T/G	6	22367420	3.97053e-05	0.118182	330	0.0572766	0.107475	-1.47252	FGN	Group2	Stress_Y16
LOC_Os06g37790	NA	expressed protein	6	22364633	22367812	S6_22367767	T/C	6	22367767	4.06069e-05	0.136364	330	0.0572766	0.107345	-0.848029	FGN	Group2	Stress_Y16
LOC_Os06g37800	NA	conserved hypothetical protein	6	22370940	22371242	S6_22371022	G/A	6	22371022	5.62629e-05	0.119697	330	0.0572766	0.105461	-1.59482	FGN	Group2	Stress_Y16
LOC_Os06g37800	NA	conserved hypothetical protein	6	22370940	22371242	S6_22371050	T/C	6	22371050	1.48696e-05	0.0984848	330	0.0572766	0.113193	1.21084	FGN	Group2	Stress_Y16
LOC_Os06g37800	NA	conserved hypothetical protein	6	22370940	22371242	S6_22371112	T/C	6	22371112	5.13208e-05	0.124242	330	0.0572766	0.105991	-0.138089	FGN	Group2	Stress_Y16
LOC_Os06g37800	NA	conserved hypothetical protein	6	22370940	22371242	S6_22371193	T/C	6	22371193	8.29916e-06	0.10303	330	0.0572766	0.116616	-0.970549	FGN	Group2	Stress_Y16
LOC_Os06g37820	NA	Leucine Rich Repeat family protein, expressed	6	22376666	22387246	S6_22376702	A/C	6	22376702	1.20794e-05	0.104545	330	0.0572766	0.11441	1.16218	FGN	Group2	Stress_Y16
LOC_Os06g37820	NA	Leucine Rich Repeat family protein, expressed	6	22376666	22387246	S6_22383412	T/A	6	22383412	1.93642e-05	0.122727	330	0.0572766	0.11165	0.582182	FGN	Group2	Stress_Y16
LOC_Os06g37820	NA	Leucine Rich Repeat family protein, expressed	6	22376666	22387246	S6_22383445	T/G	6	22383445	3.49188e-05	0.110606	330	0.0572766	0.10822	0.549204	FGN	Group2	Stress_Y16
LOC_Os06g37820	NA	Leucine Rich Repeat family protein, expressed	6	22376666	22387246	S6_22385216	T/G	6	22385216	3.47464e-06	0.116667	330	0.0572766	0.121762	0.0730718	FGN	Group2	Stress_Y16
LOC_Os06g37820	NA	Leucine Rich Repeat family protein, expressed	6	22376666	22387246	S6_22386228	A/G	6	22386228	3.93462e-05	0.133333	330	0.0572766	0.107528	0.130522	FGN	Group2	Stress_Y16
LOC_Os06g37820	NA	Leucine Rich Repeat family protein, expressed	6	22376666	22387246	S6_22386286	T/C	6	22386286	3.69904e-05	0.125758	330	0.0572766	0.107886	2.01721	FGN	Group2	Stress_Y16
LOC_Os06g37820	NA	Leucine Rich Repeat family protein, expressed	6	22376666	22387246	S6_22386347	A/T	6	22386347	6.58893e-05	0.134848	330	0.0572766	0.104551	-0.819876	FGN	Group2	Stress_Y16
LOC_Os06g37820	NA	Leucine Rich Repeat family protein, expressed	6	22376666	22387246	S6_22386389	G/C	6	22386389	9.67226e-05	0.131818	330	0.0572766	0.102345	-1.31448	FGN	Group2	Stress_Y16
LOC_Os06g37820	NA	Leucine Rich Repeat family protein, expressed	6	22376666	22387246	S6_22386709	T/C	6	22386709	1.1794e-05	0.10303	330	0.0572766	0.114551	-0.780382	FGN	Group2	Stress_Y16
LOC_Os06g37820	NA	Leucine Rich Repeat family protein, expressed	6	22376666	22387246	S6_22386827	A/G	6	22386827	6.43972e-05	0.107256	317	0.046649	0.0966353	0.487365	SSR	Group2	Stress_Y16
LOC_Os06g37820	NA	Leucine Rich Repeat family protein, expressed	6	22376666	22387246	S6_22386827	A/G	6	22386827	1.38013e-05	0.110606	330	0.0572766	0.11363	0.30341	FGN	Group2	Stress_Y16
LOC_Os06g37830	NA	transposon protein, putative, CACTA, En/Spm sub-class, expressed	6	22388367	22390893	S6_22388905	T/C	6	22388905	2.3349e-05	0.0984848	330	0.0572766	0.110559	1.45059	FGN	Group2	Stress_Y16
LOC_Os06g37830	NA	transposon protein, putative, CACTA, En/Spm sub-class, expressed	6	22388367	22390893	S6_22389178	A/G	6	22389178	4.50138e-05	0.1	330	0.0572766	0.106749	-0.975372	FGN	Group2	Stress_Y16
LOC_Os06g37830	NA	transposon protein, putative, CACTA, En/Spm sub-class, expressed	6	22388367	22390893	S6_22390756	C/G	6	22390756	8.50339e-06	0.101515	330	0.0572766	0.116473	-1.34311	FGN	Group2	Stress_Y16
LOC_Os06g37830	NA	transposon protein, putative, CACTA, En/Spm sub-class, expressed	6	22388367	22390893	S6_22390861	C/G	6	22390861	5.82805e-06	0.101515	330	0.0572766	0.1187	2.41945	FGN	Group2	Stress_Y16
LOC_Os06g37840	NA	resistance protein, putative, expressed	6	22396862	22398668	S6_22397074	A/G	6	22397074	8.55159e-06	0.115152	330	0.0572766	0.116439	3.52828	FGN	Group2	Stress_Y16
LOC_Os06g37840	NA	resistance protein, putative, expressed	6	22396862	22398668	S6_22397134	T/C	6	22397134	6.57705e-05	0.109091	330	0.0572766	0.104561	0.437828	FGN	Group2	Stress_Y16
LOC_Os06g37840	NA	resistance protein, putative, expressed	6	22396862	22398668	S6_22397314	T/C	6	22397314	1.0295e-05	0.10303	330	0.0572766	0.115349	4.74384	FGN	Group2	Stress_Y16
LOC_Os06g37840	NA	resistance protein, putative, expressed	6	22396862	22398668	S6_22397365	T/C	6	22397365	2.68555e-05	0.106061	330	0.0572766	0.109744	-0.18135	FGN	Group2	Stress_Y16
LOC_Os06g37840	NA	resistance protein, putative, expressed	6	22396862	22398668	S6_22397427	A/G	6	22397427	4.63551e-05	0.118182	330	0.0572766	0.106579	-1.63021	FGN	Group2	Stress_Y16
LOC_Os06g37840	NA	resistance protein, putative, expressed	6	22396862	22398668	S6_22397539	G/A	6	22397539	2.30965e-05	0.0984848	330	0.0572766	0.110622	-1.1907	FGN	Group2	Stress_Y16
LOC_Os06g37850	NA	transposon protein, putative, CACTA, En/Spm sub-class, expressed	6	22405665	22407762	S6_22406169	C/G	6	22406169	6.70148e-06	0.101515	330	0.0572766	0.117876	1.92932	FGN	Group2	Stress_Y16
LOC_Os06g37850	NA	transposon protein, putative, CACTA, En/Spm sub-class, expressed	6	22405665	22407762	S6_22406432	A/G	6	22406432	9.37765e-06	0.10303	330	0.0572766	0.115897	1.44366	FGN	Group2	Stress_Y16
LOC_Os06g37850	NA	transposon protein, putative, CACTA, En/Spm sub-class, expressed	6	22405665	22407762	S6_22406603	A/G	6	22406603	4.21582e-06	0.101515	330	0.0572766	0.120616	3.01106	FGN	Group2	Stress_Y16
LOC_Os06g37860	NA	transposon protein, putative, CACTA, En/Spm sub-class, expressed	6	22416503	22419644	S6_22416551	G/C	6	22416551	4.81664e-05	0.145455	330	0.0572766	0.106358	-1.18209	FGN	Group2	Stress_Y16
LOC_Os06g37860	NA	transposon protein, putative, CACTA, En/Spm sub-class, expressed	6	22416503	22419644	S6_22416601	A/G	6	22416601	2.72282e-05	0.282334	317	0.046649	0.101894	-1.72882	SSR	Group2	Stress_Y16
LOC_Os06g37860	NA	transposon protein, putative, CACTA, En/Spm sub-class, expressed	6	22416503	22419644	S6_22416601	A/G	6	22416601	9.39491e-05	0.284848	330	0.0572766	0.102512	-0.597334	FGN	Group2	Stress_Y16
LOC_Os06g37860	NA	transposon protein, putative, CACTA, En/Spm sub-class, expressed	6	22416503	22419644	S6_22416916	C/G	6	22416916	4.04197e-05	0.14697	330	0.0572766	0.107372	1.78848	FGN	Group2	Stress_Y16
LOC_Os06g37860	NA	transposon protein, putative, CACTA, En/Spm sub-class, expressed	6	22416503	22419644	S6_22416937	T/C	6	22416937	7.2716e-05	0.15	330	0.0572766	0.103983	-1.99488	FGN	Group2	Stress_Y16
LOC_Os06g37860	NA	transposon protein, putative, CACTA, En/Spm sub-class, expressed	6	22416503	22419644	S6_22417006	A/C	6	22417006	9.17421e-05	0.154545	330	0.0572766	0.102648	-2.16318	FGN	Group2	Stress_Y16
LOC_Os06g37860	NA	transposon protein, putative, CACTA, En/Spm sub-class, expressed	6	22416503	22419644	S6_22418008	T/C	6	22418008	7.8657e-05	0.142424	330	0.0572766	0.103532	-1.21777	FGN	Group2	Stress_Y16
LOC_Os06g37860	NA	transposon protein, putative, CACTA, En/Spm sub-class, expressed	6	22416503	22419644	S6_22418086	T/C	6	22418086	8.20182e-05	0.146688	317	0.046649	0.0951672	0.192361	SSR	Group2	Stress_Y16
LOC_Os06g37880	NA	expressed protein	6	22428342	22430289	S6_22428643	A/G	6	22428643	2.7496e-05	0.115152	330	0.0572766	0.109607	2.64698	FGN	Group2	Stress_Y16
LOC_Os06g37880	NA	expressed protein	6	22428342	22430289	S6_22428701	A/G	6	22428701	9.30486e-06	0.10303	330	0.0572766	0.115943	-0.507856	FGN	Group2	Stress_Y16
LOC_Os06g37880	NA	expressed protein	6	22428342	22430289	S6_22429869	A/G	6	22429869	1.25482e-05	0.101515	330	0.0572766	0.114187	-2.46871	FGN	Group2	Stress_Y16
LOC_Os06g37880	NA	expressed protein	6	22428342	22430289	S6_22429998	T/A	6	22429998	2.36295e-06	0.101515	330	0.0572766	0.124055	-0.972834	FGN	Group2	Stress_Y16
LOC_Os06g37880	NA	expressed protein	6	22428342	22430289	S6_22429998	T/A	6	22429998	6.0372e-05	0.0993691	317	0.046649	0.0970278	-1.24318	SSR	Group2	Stress_Y16
LOC_Os06g37880	NA	expressed protein	6	22428342	22430289	S6_22430238	T/C	6	22430238	9.60438e-05	0.255521	317	0.046649	0.0942112	-1.771	SSR	Group2	Stress_Y16
LOC_Os06g37880	NA	expressed protein	6	22428342	22430289	S6_22430283	C/G	6	22430283	2.43887e-05	0.10303	330	0.0572766	0.110305	1.74546	FGN	Group2	Stress_Y16
LOC_Os06g38050	NA	transposon protein, putative, CACTA, En/Spm sub-class, expressed	6	22496593	22499835	S6_22498606	T/C	6	22498606	1.68957e-05	0.1	330	0.0572766	0.112446	2.60865	FGN	Group2	Stress_Y16
LOC_Os06g38050	NA	transposon protein, putative, CACTA, En/Spm sub-class, expressed	6	22496593	22499835	S6_22498967	C/T	6	22498967	7.89861e-06	0.101515	330	0.0572766	0.116907	0.487287	FGN	Group2	Stress_Y16
LOC_Os06g38050	NA	transposon protein, putative, CACTA, En/Spm sub-class, expressed	6	22496593	22499835	S6_22499548	T/C	6	22499548	3.79494e-06	0.1	330	0.0572766	0.121239	1.67153	FGN	Group2	Stress_Y16
LOC_Os06g38050	NA	transposon protein, putative, CACTA, En/Spm sub-class, expressed	6	22496593	22499835	S6_22499699	A/G	6	22499699	1.52479e-05	0.1	330	0.0572766	0.113046	-1.40565	FGN	Group2	Stress_Y16
LOC_Os06g38056	NA	expressed protein	6	22502203	22502822	S6_22502542	G/T	6	22502542	5.54521e-05	0.160883	317	0.046649	0.0975452	-1.53185	SSR	Group2	Stress_Y16
LOC_Os06g38080	NA	von Willebrand factor type A domain containing protein, putative, expressed	6	22522396	22526017	S6_22523688	T/C	6	22523688	5.44856e-05	0.125758	330	0.0572766	0.105646	-2.40197	FGN	Group2	Stress_Y16
LOC_Os06g38080	NA	von Willebrand factor type A domain containing protein, putative, expressed	6	22522396	22526017	S6_22523688	T/C	6	22523688	3.32339e-05	0.121451	317	0.046649	0.100672	-0.281556	SSR	Group2	Stress_Y16
LOC_Os06g38080	NA	von Willebrand factor type A domain containing protein, putative, expressed	6	22522396	22526017	S6_22524944	G/C	6	22524944	2.66771e-05	0.176656	317	0.046649	0.10202	-1.75864	SSR	Group2	Stress_Y16
LOC_Os06g38090	NA	transposon protein, putative, unclassified, expressed	6	22526687	22535530	S6_22527286	T/C	6	22527286	8.46918e-05	0.132492	317	0.046649	0.0949728	-1.61913	SSR	Group2	Stress_Y16
LOC_Os06g38090	NA	transposon protein, putative, unclassified, expressed	6	22526687	22535530	S6_22527286	T/C	6	22527286	8.74949e-05	0.136364	330	0.0572766	0.10292	0.325399	FGN	Group2	Stress_Y16
LOC_Os06g38090	NA	transposon protein, putative, unclassified, expressed	6	22526687	22535530	S6_22527850	A/C	6	22527850	7.10134e-05	0.123028	317	0.046649	0.0960412	-1.78886	SSR	Group2	Stress_Y16
LOC_Os06g38090	NA	transposon protein, putative, unclassified, expressed	6	22526687	22535530	S6_22527850	A/C	6	22527850	6.58043e-05	0.127273	330	0.0572766	0.104558	0.0622996	FGN	Group2	Stress_Y16
LOC_Os06g38090	NA	transposon protein, putative, unclassified, expressed	6	22526687	22535530	S6_22528175	T/C	6	22528175	8.56554e-05	0.131818	330	0.0572766	0.103042	-0.620537	FGN	Group2	Stress_Y16
LOC_Os06g38090	NA	transposon protein, putative, unclassified, expressed	6	22526687	22535530	S6_22528187	T/C	6	22528187	9.67336e-05	0.130303	330	0.0572766	0.102345	1.48068	FGN	Group2	Stress_Y16
LOC_Os06g38090	NA	transposon protein, putative, unclassified, expressed	6	22526687	22535530	S6_22528298	T/C	6	22528298	7.21809e-05	0.137879	330	0.0572766	0.104026	0.708931	FGN	Group2	Stress_Y16
LOC_Os06g38090	NA	transposon protein, putative, unclassified, expressed	6	22526687	22535530	S6_22528460	A/G	6	22528460	9.85828e-05	0.137879	330	0.0572766	0.102236	2.40872	FGN	Group2	Stress_Y16
LOC_Os06g38090	NA	transposon protein, putative, unclassified, expressed	6	22526687	22535530	S6_22528829	T/G	6	22528829	6.58947e-05	0.134848	330	0.0572766	0.10455	-1.33778	FGN	Group2	Stress_Y16
LOC_Os06g38090	NA	transposon protein, putative, unclassified, expressed	6	22526687	22535530	S6_22530499	C/T	6	22530499	2.3056e-05	0.134069	317	0.046649	0.102916	-0.407447	SSR	Group2	Stress_Y16
LOC_Os06g38090	NA	transposon protein, putative, unclassified, expressed	6	22526687	22535530	S6_22530499	C/T	6	22530499	8.61838e-05	0.136364	330	0.0572766	0.103007	-3.14607	FGN	Group2	Stress_Y16
LOC_Os06g38090	NA	transposon protein, putative, unclassified, expressed	6	22526687	22535530	S6_22530543	G/C	6	22530543	8.75887e-05	0.140379	317	0.046649	0.094769	-0.430299	SSR	Group2	Stress_Y16
LOC_Os06g38090	NA	transposon protein, putative, unclassified, expressed	6	22526687	22535530	S6_22531194	A/G	6	22531194	5.04116e-05	0.137879	330	0.0572766	0.106095	3.99293	FGN	Group2	Stress_Y16
LOC_Os06g38090	NA	transposon protein, putative, unclassified, expressed	6	22526687	22535530	S6_22531830	T/C	6	22531830	7.38886e-05	0.140909	330	0.0572766	0.103891	4.01455	FGN	Group2	Stress_Y16
LOC_Os06g38090	NA	transposon protein, putative, unclassified, expressed	6	22526687	22535530	S6_22531907	A/G	6	22531907	8.22201e-05	0.207576	330	0.0572766	0.103277	-2.4949	FGN	Group2	Stress_Y16
LOC_Os06g38090	NA	transposon protein, putative, unclassified, expressed	6	22526687	22535530	S6_22532462	A/G	6	22532462	2.38583e-05	0.174242	330	0.0572766	0.110433	-2.65838	FGN	Group2	Stress_Y16
LOC_Os06g38090	NA	transposon protein, putative, unclassified, expressed	6	22526687	22535530	S6_22532480	T/C	6	22532480	4.86511e-05	0.134848	330	0.0572766	0.1063	-3.57102	FGN	Group2	Stress_Y16
LOC_Os06g38090	NA	transposon protein, putative, unclassified, expressed	6	22526687	22535530	S6_22532480	T/C	6	22532480	9.49458e-05	0.132492	317	0.046649	0.0942808	-0.750335	SSR	Group2	Stress_Y16
LOC_Os06g38090	NA	transposon protein, putative, unclassified, expressed	6	22526687	22535530	S6_22532900	A/G	6	22532900	9.54748e-06	0.145455	330	0.0572766	0.115791	3.36642	FGN	Group2	Stress_Y16
LOC_Os06g38090	NA	transposon protein, putative, unclassified, expressed	6	22526687	22535530	S6_22532900	A/G	6	22532900	2.93826e-05	0.141956	317	0.046649	0.101427	0.588749	SSR	Group2	Stress_Y16
LOC_Os06g38090	NA	transposon protein, putative, unclassified, expressed	6	22526687	22535530	S6_22534153	A/G	6	22534153	3.71874e-05	0.119697	330	0.0572766	0.107855	-1.97685	FGN	Group2	Stress_Y16
LOC_Os06g38090	NA	transposon protein, putative, unclassified, expressed	6	22526687	22535530	S6_22534850	C/G	6	22534850	4.40381e-05	0.140909	330	0.0572766	0.106876	1.95928	FGN	Group2	Stress_Y16
LOC_Os06g38090	NA	transposon protein, putative, unclassified, expressed	6	22526687	22535530	S6_22535003	C/T	6	22535003	6.18602e-05	0.171212	330	0.0572766	0.104914	2.30959	FGN	Group2	Stress_Y16
LOC_Os06g38100	NA	S-locus-like receptor protein kinase, putative	6	22536600	22538235	S6_22536640	A/C	6	22536640	8.01554e-05	0.140909	330	0.0572766	0.103423	2.66382	FGN	Group2	Stress_Y16
LOC_Os06g38100	NA	S-locus-like receptor protein kinase, putative	6	22536600	22538235	S6_22536821	A/C	6	22536821	3.91279e-05	0.137879	330	0.0572766	0.10756	-1.34282	FGN	Group2	Stress_Y16
LOC_Os06g38100	NA	S-locus-like receptor protein kinase, putative	6	22536600	22538235	S6_22536821	A/C	6	22536821	4.81451e-05	0.134069	317	0.046649	0.0984064	-2.28049	SSR	Group2	Stress_Y16
LOC_Os06g38100	NA	S-locus-like receptor protein kinase, putative	6	22536600	22538235	S6_22537144	G/A	6	22537144	5.74634e-05	0.129338	317	0.046649	0.0973283	-0.0505251	SSR	Group2	Stress_Y16
LOC_Os06g38100	NA	S-locus-like receptor protein kinase, putative	6	22536600	22538235	S6_22537144	G/A	6	22537144	1.31026e-05	0.133333	330	0.0572766	0.113934	-1.81866	FGN	Group2	Stress_Y16
LOC_Os06g38294	NA	peptide transporter PTR2, putative, expressed	6	22655615	22665089	S6_22658872	T/G	6	22658872	3.96121e-05	0.143939	330	0.0572766	0.107489	-1.72311	FGN	Group2	Stress_Y16
LOC_Os06g38320	NA	expressed protein	6	22699041	22705078	S6_22701789	A/T	6	22701789	9.46859e-05	0.119697	330	0.0572766	0.102467	-2.73263	FGN	Group2	Stress_Y16
LOC_Os06g38320	NA	expressed protein	6	22699041	22705078	S6_22702223	T/C	6	22702223	5.76192e-05	0.128788	330	0.0572766	0.105323	0.484013	FGN	Group2	Stress_Y16
LOC_Os06g38320	NA	expressed protein	6	22699041	22705078	S6_22702227	C/T	6	22702227	8.57443e-05	0.127273	330	0.0572766	0.103036	0.107571	FGN	Group2	Stress_Y16
LOC_Os06g39800	NA	expressed protein	6	23649633	23649977	S6_23649718	G/A	6	23649718	5.87606e-05	0.0523077	325	0.0606353	0.109162	-0.22856	PN	Group2	Stress_Y16
LOC_Os06g44034	SDT	expressed protein	6	26554537	26561226	S6_26557577	T/C	6	26557577	9.46156e-05	0.190852	317	0.046649	0.0943019	0.316599	SSR	Group2	Stress_Y16
LOC_Os06g44040	NA	DOMON domain containing protein, expressed	6	26563139	26566299	S6_26563537	T/G	6	26563537	1.46403e-05	0.222397	317	0.046649	0.105716	0.788995	SSR	Group2	Stress_Y16
LOC_Os06g44050	Sdt97	methyladenine glycosylase, putative, expressed	6	26569416	26572458	S6_26571066	T/A	6	26571066	9.18171e-05	0.206625	317	0.046649	0.0944836	0.474963	SSR	Group2	Stress_Y16
LOC_Os06g44050	Sdt97	methyladenine glycosylase, putative, expressed	6	26569416	26572458	S6_26571186	C/G	6	26571186	4.09636e-05	0.197161	317	0.046649	0.0993926	1.1366	SSR	Group2	Stress_Y16
LOC_Os06g44050	Sdt97	methyladenine glycosylase, putative, expressed	6	26569416	26572458	S6_26571507	T/C	6	26571507	6.36664e-05	0.190852	317	0.046649	0.0967047	-0.34868	SSR	Group2	Stress_Y16
LOC_Os06g44050	Sdt97	methyladenine glycosylase, putative, expressed	6	26569416	26572458	S6_26572380	G/C	6	26572380	8.63385e-05	0.212934	317	0.046649	0.0948561	0.469792	SSR	Group2	Stress_Y16
LOC_Os06g44050	Sdt97	methyladenine glycosylase, putative, expressed	6	26569416	26572458	S6_26572383	G/C	6	26572383	7.77105e-05	0.276025	317	0.046649	0.0954943	-0.536384	SSR	Group2	Stress_Y16
LOC_Os06g44070	NA	retrotransposon protein, putative, unclassified, expressed	6	26581702	26583748	S6_26582325	C/T	6	26582325	6.38726e-05	0.378549	317	0.046649	0.0966851	1.07648	SSR	Group2	Stress_Y16
LOC_Os06g44070	NA	retrotransposon protein, putative, unclassified, expressed	6	26581702	26583748	S6_26583143	T/C	6	26583143	4.34609e-05	0.293375	317	0.046649	0.0990311	1.12301	SSR	Group2	Stress_Y16
LOC_Os06g44070	NA	retrotransposon protein, putative, unclassified, expressed	6	26581702	26583748	S6_26583611	G/A	6	26583611	8.19552e-05	0.217666	317	0.046649	0.0951718	0.55382	SSR	Group2	Stress_Y16
LOC_Os06g44080	NA	ubiquitin family protein, putative, expressed	6	26585560	26588132	S6_26586132	T/C	6	26586132	8.034e-05	0.200315	317	0.046649	0.0952925	-0.0830109	SSR	Group2	Stress_Y16
LOC_Os06g44080	NA	ubiquitin family protein, putative, expressed	6	26585560	26588132	S6_26586191	A/G	6	26586191	6.18039e-05	0.201893	317	0.046649	0.0968853	0.365395	SSR	Group2	Stress_Y16
LOC_Os06g44080	NA	ubiquitin family protein, putative, expressed	6	26585560	26588132	S6_26586216	T/C	6	26586216	5.7328e-05	0.20347	317	0.046649	0.0973427	-0.637651	SSR	Group2	Stress_Y16
LOC_Os07g02250	NA	expressed protein	7	722836	726496	S7_725279	A/G	7	725279	6.40378e-05	0.268182	330	0.0572766	0.104715	-3.17093	FGN	Group2	Stress_Y16
LOC_Os07g14990	NA	retrotransposon protein, putative, Ty3-gypsy subclass, expressed	7	8594496	8598397	S7_8595540	T/C	7	8595540	5.14592e-05	0.142424	330	0.0572766	0.105976	-4.09384	FGN	Group2	Stress_Y16
LOC_Os07g15020	NA	expressed protein	7	8609214	8611170	S7_8609822	T/A	7	8609822	5.92742e-06	0.148485	330	0.0572766	0.1186	3.75454	FGN	Group2	Stress_Y16
LOC_Os07g15290	NA	transposon protein, putative, CACTA, En/Spm sub-class, expressed	7	8819256	8822308	S7_8820852	T/A	7	8820852	2.1933e-05	0.140909	330	0.0572766	0.110923	-3.9978	FGN	Group2	Stress_Y16
LOC_Os07g18874	NA	white-brown complex homolog protein 11, putative, expressed	7	11170888	11182974	S7_11176864	A/G	7	11176864	8.00644e-05	0.125758	330	0.0572766	0.10343	-1.29385	FGN	Group2	Stress_Y16
LOC_Os07g23430	NA	fatty acid desaturase, putative, expressed	7	13219680	13224915	S7_13220758	G/A	7	13220758	5.6613e-06	0.142424	330	0.0572766	0.118871	NA	FGN	Group2	Stress_Y16
LOC_Os07g23580	NA	expressed protein	7	13330030	13330940	S7_13330500	C/T	7	13330500	8.18404e-05	0.293939	330	0.0572766	0.103304	NA	FGN	Group2	Stress_Y16
LOC_Os07g23800	NA	ribosomal protein S5, C-terminal domain containing protein, expressed	7	13441131	13442450	S7_13442389	A/G	7	13442389	8.27353e-05	0.118182	330	0.0572766	0.103241	NA	FGN	Group2	Stress_Y16
LOC_Os07g25440	NA	WD domain, G-beta repeat domain containing protein, expressed	7	14534478	14541920	S7_14538379	T/C	7	14538379	8.55922e-05	0.0978261	184	0.0118261	0.100553	-0.839378	PN	Group1	Stress_Y16
LOC_Os07g25630	NA	retrotransposon protein, putative, Ty3-gypsy subclass, expressed	7	14691470	14698390	S7_14695572	C/T	7	14695572	6.90453e-05	0.102349	298	0.0223987	0.0766026	-0.0790035	GY	Group2	Stress_Y16
LOC_Os07g27310	NA	CRAL/TRIO domain containing protein, expressed	7	15875835	15880856	S7_15878155	G/A	7	15878155	8.4022e-05	0.157576	330	0.0572766	0.103153	NA	FGN	Group2	Stress_Y16
LOC_Os07g27320	NA	glycosyl hydrolase family 10 protein, putative, expressed	7	15884357	15890032	S7_15886837	A/G	7	15886837	5.39338e-05	0.154545	330	0.0572766	0.105705	0.858641	FGN	Group2	Stress_Y16
LOC_Os07g27320	NA	glycosyl hydrolase family 10 protein, putative, expressed	7	15884357	15890032	S7_15887224	T/C	7	15887224	5.96421e-05	0.162121	330	0.0572766	0.105124	0.499158	FGN	Group2	Stress_Y16
LOC_Os07g27320	NA	glycosyl hydrolase family 10 protein, putative, expressed	7	15884357	15890032	S7_15887880	T/C	7	15887880	2.78866e-05	0.157576	330	0.0572766	0.109525	NA	FGN	Group2	Stress_Y16
LOC_Os07g27330	NA	no apical meristem protein, expressed	7	15899431	15902146	S7_15901451	T/G	7	15901451	7.4862e-05	0.156061	330	0.0572766	0.103816	1.25988	FGN	Group2	Stress_Y16
LOC_Os07g27900	NA	retrotransposon protein, putative, Ty1-copia subclass	7	16278537	16281387	S7_16278706	T/C	7	16278706	7.85399e-05	0.153846	325	0.0606353	0.107471	-0.501372	PN	Group2	Stress_Y16
LOC_Os07g31884	NA	MATE efflux family protein, putative, expressed	7	18956322	18963235	S7_18961870	T/C	7	18961870	8.22256e-05	0.446176	353	0.204667	0.240856	-14.7587	TSN	Group2	Stress_Y16
LOC_Os07g32050	NA	expressed protein	7	19058043	19059852	S7_19058992	A/T	7	19058992	2.3152e-05	0.156061	330	0.0572766	0.110608	-4.23701	FGN	Group2	Stress_Y16
LOC_Os07g33020	NA	hypothetical protein	7	19727306	19728143	S7_19728073	T/C	7	19728073	5.40624e-05	0.127479	353	0.204667	0.242752	-0.949636	TSN	Group2	Stress_Y16
LOC_Os07g33080	NA	expressed protein	7	19751197	19753691	S7_19752937	T/G	7	19752937	4.75404e-05	0.0689655	203	0.0411146	0.124474	-3.60945	TSN	Group1	Stress_Y16
LOC_Os07g33080	NA	expressed protein	7	19751197	19753691	S7_19753022	G/A	7	19753022	7.64754e-05	0.0676923	325	0.0606353	0.107626	0.2479	PN	Group2	Stress_Y16
LOC_Os07g33130	NA	retrotransposon protein, putative, unclassified, expressed	7	19783322	19786820	S7_19786171	C/T	7	19786171	5.78847e-05	0.0640394	203	0.0411146	0.122516	8.51627	TSN	Group1	Stress_Y16
LOC_Os07g33300	NA	expressed protein	7	19905025	19909628	S7_19908955	G/A	7	19908955	5.06451e-05	0.0591133	203	0.0411146	0.123844	-9.18592	TSN	Group1	Stress_Y16
LOC_Os07g35800	NA	hypothetical protein	7	21438147	21440196	S7_21439926	T/C	7	21439926	8.07174e-05	0.0678233	317	0.046649	0.0952641	0.515484	SSR	Group2	Stress_Y16
LOC_Os07g35810	NA	TKL_IRAK_DUF26-ld.6 - DUF26 kinases have homology to DUF26 containing loci, expressed	7	21441037	21444823	S7_21444003	T/C	7	21444003	1.62983e-05	0.119874	317	0.046649	0.105053	NA	SSR	Group2	Stress_Y16
LOC_Os07g35870	NA	basic helix-loop-helix DND-binding domain containing protein, expressed	7	21466736	21469857	S7_21468292	C/G	7	21468292	5.31921e-05	0.0694006	317	0.046649	0.0977987	0.472796	SSR	Group2	Stress_Y16
LOC_Os07g35870	NA	basic helix-loop-helix DND-binding domain containing protein, expressed	7	21466736	21469857	S7_21468954	C/G	7	21468954	4.82577e-05	0.104101	317	0.046649	0.0983922	-0.361154	SSR	Group2	Stress_Y16
LOC_Os07g35940	NA	beta-amylase, putative, expressed	7	21503815	21506356	S7_21504303	G/A	7	21504303	2.60597e-05	0.129338	317	0.046649	0.102164	1.28941	SSR	Group2	Stress_Y16
LOC_Os07g35940	NA	beta-amylase, putative, expressed	7	21503815	21506356	S7_21504304	C/T	7	21504304	8.02327e-05	0.138801	317	0.046649	0.0953006	-0.138804	SSR	Group2	Stress_Y16
LOC_Os07g35940	NA	beta-amylase, putative, expressed	7	21503815	21506356	S7_21504334	T/C	7	21504334	8.34038e-05	0.129338	317	0.046649	0.0950656	-1.31335	SSR	Group2	Stress_Y16
LOC_Os07g35940	NA	beta-amylase, putative, expressed	7	21503815	21506356	S7_21504457	C/A	7	21504457	9.75706e-05	0.132492	317	0.046649	0.0941158	-0.270015	SSR	Group2	Stress_Y16
LOC_Os07g35940	NA	beta-amylase, putative, expressed	7	21503815	21506356	S7_21504645	T/A	7	21504645	9.48516e-05	0.126183	317	0.046649	0.0942868	1.23785	SSR	Group2	Stress_Y16
LOC_Os07g35940	NA	beta-amylase, putative, expressed	7	21503815	21506356	S7_21504766	T/G	7	21504766	4.9307e-05	0.135647	317	0.046649	0.098261	0.302514	SSR	Group2	Stress_Y16
LOC_Os07g35940	NA	beta-amylase, putative, expressed	7	21503815	21506356	S7_21504992	G/C	7	21504992	9.73645e-05	0.135647	317	0.046649	0.0941286	-1.4403	SSR	Group2	Stress_Y16
LOC_Os07g35940	NA	beta-amylase, putative, expressed	7	21503815	21506356	S7_21505383	T/C	7	21505383	3.66677e-05	0.14511	317	0.046649	0.10007	-1.95173	SSR	Group2	Stress_Y16
LOC_Os07g35940	NA	beta-amylase, putative, expressed	7	21503815	21506356	S7_21505445	C/G	7	21505445	8.45155e-05	0.165615	317	0.046649	0.0949854	1.95173	SSR	Group2	Stress_Y16
LOC_Os07g35940	NA	beta-amylase, putative, expressed	7	21503815	21506356	S7_21506338	T/C	7	21506338	2.35414e-05	0.138801	317	0.046649	0.102788	4.32266	SSR	Group2	Stress_Y16
LOC_Os07g35950	NA	expressed protein	7	21509949	21510851	S7_21510057	A/G	7	21510057	7.64161e-05	0.159306	317	0.046649	0.0955962	-0.852856	SSR	Group2	Stress_Y16
LOC_Os07g35950	NA	expressed protein	7	21509949	21510851	S7_21510072	G/T	7	21510072	4.99529e-05	0.192429	317	0.046649	0.0981816	-3.2796	SSR	Group2	Stress_Y16
LOC_Os07g35960	NA	expressed protein	7	21513062	21517011	S7_21513088	C/A	7	21513088	6.13699e-05	0.165615	317	0.046649	0.0969281	-0.605025	SSR	Group2	Stress_Y16
LOC_Os07g35960	NA	expressed protein	7	21513062	21517011	S7_21513091	A/C	7	21513091	5.71185e-05	0.170347	317	0.046649	0.097365	0.293583	SSR	Group2	Stress_Y16
LOC_Os07g35960	NA	expressed protein	7	21513062	21517011	S7_21513463	A/C	7	21513463	8.7545e-05	0.181388	317	0.046649	0.0947721	0.450224	SSR	Group2	Stress_Y16
LOC_Os07g35960	NA	expressed protein	7	21513062	21517011	S7_21513539	A/G	7	21513539	5.93243e-06	0.255521	317	0.046649	0.111324	-3.05851	SSR	Group2	Stress_Y16
LOC_Os07g35960	NA	expressed protein	7	21513062	21517011	S7_21513553	T/A	7	21513553	2.12514e-05	0.244479	317	0.046649	0.103418	-4.07606	SSR	Group2	Stress_Y16
LOC_Os07g35960	NA	expressed protein	7	21513062	21517011	S7_21513587	G/A	7	21513587	3.28943e-05	0.249211	317	0.046649	0.100735	3.09997	SSR	Group2	Stress_Y16
LOC_Os07g35960	NA	expressed protein	7	21513062	21517011	S7_21513588	C/T	7	21513588	7.66489e-06	0.244479	317	0.046649	0.109729	5.71514	SSR	Group2	Stress_Y16
LOC_Os07g35960	NA	expressed protein	7	21513062	21517011	S7_21513716	T/C	7	21513716	6.25157e-05	0.249211	317	0.046649	0.0968156	0.742324	SSR	Group2	Stress_Y16
LOC_Os07g35960	NA	expressed protein	7	21513062	21517011	S7_21514070	A/G	7	21514070	1.34191e-05	0.148265	317	0.046649	0.106255	0.458769	SSR	Group2	Stress_Y16
LOC_Os07g35960	NA	expressed protein	7	21513062	21517011	S7_21514074	A/C	7	21514074	1.52595e-05	0.149842	317	0.046649	0.10546	-0.461135	SSR	Group2	Stress_Y16
LOC_Os07g35960	NA	expressed protein	7	21513062	21517011	S7_21514080	A/T	7	21514080	1.91614e-05	0.146688	317	0.046649	0.104055	0.262979	SSR	Group2	Stress_Y16
LOC_Os07g35960	NA	expressed protein	7	21513062	21517011	S7_21514084	T/G	7	21514084	7.95642e-05	0.149842	317	0.046649	0.0953513	2.80492	SSR	Group2	Stress_Y16
LOC_Os07g35960	NA	expressed protein	7	21513062	21517011	S7_21514088	T/C	7	21514088	2.73266e-05	0.146688	317	0.046649	0.101872	-1.05099	SSR	Group2	Stress_Y16
LOC_Os07g35960	NA	expressed protein	7	21513062	21517011	S7_21514419	T/C	7	21514419	9.82023e-05	0.135647	317	0.046649	0.0940768	-2.89402	SSR	Group2	Stress_Y16
LOC_Os07g35960	NA	expressed protein	7	21513062	21517011	S7_21514432	G/T	7	21514432	3.60657e-05	0.149842	317	0.046649	0.100171	-1.85935	SSR	Group2	Stress_Y16
LOC_Os07g35960	NA	expressed protein	7	21513062	21517011	S7_21514437	T/C	7	21514437	1.57053e-05	0.154574	317	0.046649	0.105282	2.16039	SSR	Group2	Stress_Y16
LOC_Os07g35960	NA	expressed protein	7	21513062	21517011	S7_21514440	C/T	7	21514440	8.4069e-06	0.156151	317	0.046649	0.109154	-3.02258	SSR	Group2	Stress_Y16
LOC_Os07g35960	NA	expressed protein	7	21513062	21517011	S7_21514442	G/A	7	21514442	9.00093e-06	0.157729	317	0.046649	0.10873	-1.43652	SSR	Group2	Stress_Y16
LOC_Os07g35960	NA	expressed protein	7	21513062	21517011	S7_21514448	T/A	7	21514448	3.14823e-05	0.148265	317	0.046649	0.101004	-2.16775	SSR	Group2	Stress_Y16
LOC_Os07g35960	NA	expressed protein	7	21513062	21517011	S7_21514450	A/G	7	21514450	5.46373e-05	0.14511	317	0.046649	0.0976354	-1.18039	SSR	Group2	Stress_Y16
LOC_Os07g35960	NA	expressed protein	7	21513062	21517011	S7_21514464	G/A	7	21514464	2.61391e-05	0.14511	317	0.046649	0.102145	2.88434	SSR	Group2	Stress_Y16
LOC_Os07g35960	NA	expressed protein	7	21513062	21517011	S7_21514472	C/A	7	21514472	3.4249e-05	0.154574	317	0.046649	0.100488	-0.400328	SSR	Group2	Stress_Y16
LOC_Os07g35960	NA	expressed protein	7	21513062	21517011	S7_21514546	T/G	7	21514546	9.67197e-05	0.135647	317	0.046649	0.0941688	0.472387	SSR	Group2	Stress_Y16
LOC_Os07g35960	NA	expressed protein	7	21513062	21517011	S7_21514548	C/T	7	21514548	9.93323e-05	0.134069	317	0.046649	0.0940076	-1.07622	SSR	Group2	Stress_Y16
LOC_Os07g35960	NA	expressed protein	7	21513062	21517011	S7_21514684	G/A	7	21514684	9.3648e-05	0.143533	317	0.046649	0.0943641	1.02793	SSR	Group2	Stress_Y16
LOC_Os07g35960	NA	expressed protein	7	21513062	21517011	S7_21514714	A/C	7	21514714	4.10396e-05	0.134069	317	0.046649	0.0993813	0.0221906	SSR	Group2	Stress_Y16
LOC_Os07g35970	NA	SMP-30/Gluconolaconase/LRE-like region containing protein, expressed	7	21518519	21519953	S7_21519584	G/T	7	21519584	9.18565e-05	0.15142	317	0.046649	0.094481	-0.861688	SSR	Group2	Stress_Y16
LOC_Os07g35970	NA	SMP-30/Gluconolaconase/LRE-like region containing protein, expressed	7	21518519	21519953	S7_21519585	G/C	7	21519585	7.54428e-05	0.149842	317	0.046649	0.0956739	-0.774737	SSR	Group2	Stress_Y16
LOC_Os07g36160	NA	expressed protein	7	21606078	21606308	S7_21606264	A/G	7	21606264	4.63387e-05	0.0662461	317	0.046649	0.0986397	-0.603474	SSR	Group2	Stress_Y16
LOC_Os07g36170	CIGR1	chitin-inducible gibberellin-responsive protein, putative, expressed	7	21614953	21620327	S7_21615236	G/C	7	21615236	9.02712e-05	0.0962145	317	0.046649	0.0945864	0.339188	SSR	Group2	Stress_Y16
LOC_Os07g36170	CIGR1	chitin-inducible gibberellin-responsive protein, putative, expressed	7	21614953	21620327	S7_21616743	A/C	7	21616743	8.04081e-05	0.0946372	317	0.046649	0.0952873	1.99017	SSR	Group2	Stress_Y16
LOC_Os07g36190	NA	hydrolase, NUDIX family, domain containing protein, expressed	7	21625619	21628826	S7_21627802	G/A	7	21627802	9.66934e-05	0.0583596	317	0.046649	0.0941705	-2.029	SSR	Group2	Stress_Y16
LOC_Os07g36200	NA	eukaryotic translation initiation factor-related, putative, expressed	7	21629471	21633103	S7_21631929	A/T	7	21631929	8.69947e-05	0.100946	317	0.046649	0.0948102	0.660295	SSR	Group2	Stress_Y16
LOC_Os07g36210	NA	expressed protein	7	21633805	21636606	S7_21635200	T/C	7	21635200	9.79861e-05	0.126183	317	0.046649	0.0940901	-2.30367	SSR	Group2	Stress_Y16
LOC_Os07g36210	NA	expressed protein	7	21633805	21636606	S7_21636097	C/T	7	21636097	3.47116e-05	0.11041	317	0.046649	0.100406	2.29488	SSR	Group2	Stress_Y16
LOC_Os07g36220	NA	expressed protein	7	21640582	21642237	S7_21641566	T/C	7	21641566	5.75253e-05	0.100946	317	0.046649	0.0973218	0.148684	SSR	Group2	Stress_Y16
LOC_Os07g37800	NA	bromodomain domain containing protein, expressed	7	22666036	22670152	S7_22668231	T/G	7	22668231	9.16517e-05	0.392351	353	0.204667	0.240367	7.68026	TSN	Group2	Stress_Y16
LOC_Os07g37910	NA	expressed protein	7	22748432	22750666	S7_22750065	A/T	7	22750065	7.77895e-05	0.215297	353	0.204667	0.241107	1.3143	TSN	Group2	Stress_Y16
LOC_Os07g43120	NA	transposon protein, putative, unclassified, expressed	7	25839984	25843873	S7_25843145	C/T	7	25843145	1.94921e-07	0.211356	317	0.046649	0.132969	-1.60355	SSR	Group2	Stress_Y16
LOC_Os08g03910	NA	retrotransposon protein, putative, unclassified	8	1863437	1865298	S8_1864354	T/C	8	1864354	4.83853e-05	0.082153	353	0.204667	0.243255	7.80966	TSN	Group2	Stress_Y16
LOC_Os08g04010	NA	2-aminoethanethiol dioxygenase, putative, expressed	8	1920499	1921701	S8_1921526	A/T	8	1921526	9.75923e-05	0.201133	353	0.204667	0.240084	5.08486	TSN	Group2	Stress_Y16
LOC_Os08g10260	NA	NBS-LRR disease resistance protein, putative, expressed	8	5964410	5967847	S8_5966413	T/A	8	5966413	6.40405e-05	0.0652174	184	0.0118261	0.103851	1.44506	PN	Group1	Stress_Y16
LOC_Os08g10260	NA	NBS-LRR disease resistance protein, putative, expressed	8	5964410	5967847	S8_5966432	T/C	8	5966432	6.40405e-05	0.0652174	184	0.0118261	0.103851	-0.553393	PN	Group1	Stress_Y16
LOC_Os08g10260	NA	NBS-LRR disease resistance protein, putative, expressed	8	5964410	5967847	S8_5966451	T/C	8	5966451	6.40405e-05	0.0652174	184	0.0118261	0.103851	-1.07376	PN	Group1	Stress_Y16
LOC_Os08g10260	NA	NBS-LRR disease resistance protein, putative, expressed	8	5964410	5967847	S8_5966485	A/C	8	5966485	3.96387e-05	0.0706522	184	0.0118261	0.10934	-0.496563	PN	Group1	Stress_Y16
LOC_Os08g10260	NA	NBS-LRR disease resistance protein, putative, expressed	8	5964410	5967847	S8_5966558	C/T	8	5966558	6.40405e-05	0.0652174	184	0.0118261	0.103851	0.374419	PN	Group1	Stress_Y16
LOC_Os08g10260	NA	NBS-LRR disease resistance protein, putative, expressed	8	5964410	5967847	S8_5966617	G/A	8	5966617	7.0714e-06	0.0706522	184	0.0118261	0.129403	0.115267	PN	Group1	Stress_Y16
LOC_Os08g10260	NA	NBS-LRR disease resistance protein, putative, expressed	8	5964410	5967847	S8_5966920	A/C	8	5966920	5.97093e-05	0.0679348	184	0.0118261	0.104649	-0.0298744	PN	Group1	Stress_Y16
LOC_Os08g10260	NA	NBS-LRR disease resistance protein, putative, expressed	8	5964410	5967847	S8_5967005	C/A	8	5967005	8.42497e-05	0.076087	184	0.0118261	0.100732	0.537362	PN	Group1	Stress_Y16
LOC_Os08g10260	NA	NBS-LRR disease resistance protein, putative, expressed	8	5964410	5967847	S8_5967019	G/C	8	5967019	9.53345e-05	0.0679348	184	0.0118261	0.099331	0.966708	PN	Group1	Stress_Y16
LOC_Os08g16280	NA	retrotransposon protein, putative, unclassified, expressed	8	9936371	9940801	S8_9940463	A/G	8	9940463	8.88411e-05	0.403941	203	0.0411146	0.118275	-0.365684	TSN	Group1	Stress_Y16
LOC_Os08g16290	NA	retrotransposon protein, putative, unclassified, expressed	8	9943177	9947104	S8_9944704	T/C	8	9944704	8.37774e-05	0.429348	184	0.0118261	0.100796	-0.230049	PN	Group1	Stress_Y16
LOC_Os08g16340	NA	transposon protein, putative, CACTA, En/Spm sub-class, expressed	8	9966407	9969917	S8_9966651	C/A	8	9966651	9.5523e-05	0.416256	203	0.0411146	0.11756	-2.3951	TSN	Group1	Stress_Y16
LOC_Os08g16380	NA	transposon protein, putative, CACTA, En/Spm sub-class	8	10012522	10014975	S8_10013395	A/G	8	10013395	5.72657e-05	0.359606	203	0.0411146	0.122622	3.08846	TSN	Group1	Stress_Y16
LOC_Os08g16380	NA	transposon protein, putative, CACTA, En/Spm sub-class	8	10012522	10014975	S8_10014121	A/G	8	10014121	9.07491e-05	0.371921	203	0.0411146	0.118066	3.02884	TSN	Group1	Stress_Y16
LOC_Os08g16390	NA	zinc knuckle family protein, expressed	8	10020618	10022124	S8_10021764	G/A	8	10021764	8.55293e-05	0.366995	203	0.0411146	0.11865	-2.79744	TSN	Group1	Stress_Y16
LOC_Os08g16420	NA	transposon protein, putative, CACTA, En/Spm sub-class, expressed	8	10036979	10039907	S8_10039656	T/C	8	10039656	8.09078e-05	0.349754	203	0.0411146	0.119199	3.12042	TSN	Group1	Stress_Y16
LOC_Os08g23990	NA	retrotransposon protein, putative, unclassified, expressed	8	14512278	14515209	S8_14512393	A/G	8	14512393	6.57334e-05	0.421951	205	0.076618	0.152989	-0.636685	FGN	Group1	Stress_Y16
LOC_Os08g23990	NA	retrotransposon protein, putative, unclassified, expressed	8	14512278	14515209	S8_14512443	A/G	8	14512443	6.31842e-05	0.426829	205	0.076618	0.153363	1.95596	FGN	Group1	Stress_Y16
LOC_Os08g24770	NA	protein kinase, putative, expressed	8	14997285	15006831	S8_15000860	T/C	8	15000860	5.75477e-05	0.434146	205	0.076618	0.154246	0.0749304	FGN	Group1	Stress_Y16
LOC_Os08g25490	NA	berberine and berberine like domain containing protein, expressed	8	15510426	15512115	S8_15510792	A/G	8	15510792	7.74787e-05	0.135906	298	0.0223987	0.0758364	-0.665273	GY	Group2	Stress_Y16
LOC_Os08g25600	NA	hypothetical protein	8	15575674	15578484	S8_15576192	T/C	8	15576192	6.4805e-05	0.112416	298	0.0223987	0.0770244	-0.95514	GY	Group2	Stress_Y16
LOC_Os08g25820	NA	myb-like DNA-binding domain containing protein, expressed	8	15710781	15716526	S8_15712130	G/A	8	15712130	1.3644e-05	0.217054	387	0.00708178	0.0574289	-0.925963	SN	Group2	Stress_Y16
LOC_Os08g31240	NA	FACT complex subunit SPT16, putative, expressed	8	19314778	19318231	S8_19317897	T/C	8	19317897	9.83395e-05	0.0906516	353	0.204667	0.24005	-4.29847	TSN	Group2	Stress_Y16
LOC_Os08g31680	NA	retrotransposon protein, putative, unclassified, expressed	8	19635976	19641581	S8_19640904	T/C	8	19640904	5.07796e-05	0.0520505	317	0.046649	0.0980815	-1.12834	SSR	Group2	Stress_Y16
LOC_Os08g33040	NA	retrotransposon protein, putative, unclassified, expressed	8	20511964	20519960	S8_20518674	A/G	8	20518674	9.104e-05	0.16	325	0.0606353	0.106613	-0.0447582	PN	Group2	Stress_Y16
LOC_Os09g02010	NA	expressed protein	9	696905	700837	S9_700579	A/G	9	700579	6.09775e-05	0.0865633	387	0.00708178	0.0496938	0.0162209	SN	Group2	Stress_Y16
LOC_Os09g06370	NA	retrotransposon, putative, centromere-specific	9	2994251	2996152	S9_2994781	T/C	9	2994781	7.21766e-05	0.124031	387	0.00708178	0.0488301	-0.0167476	SN	Group2	Stress_Y16
LOC_Os09g18490	NA	transposon protein, putative, CACTA, En/Spm sub-class, expressed	9	11332585	11336337	S9_11334496	T/G	9	11334496	4.62865e-05	0.157729	317	0.046649	0.0986466	-2.98141	SSR	Group2	Stress_Y16
LOC_Os09g18490	NA	transposon protein, putative, CACTA, En/Spm sub-class, expressed	9	11332585	11336337	S9_11334514	A/G	9	11334514	3.4473e-05	0.159306	317	0.046649	0.100448	-4.15743	SSR	Group2	Stress_Y16
LOC_Os09g20684	NA	SMP-30/Gluconolaconase/LRE-like region containing protein, expressed	9	12454365	12460996	S9_12460264	T/C	9	12460264	9.56151e-05	0.127692	325	0.0606353	0.106328	-0.0920278	PN	Group2	Stress_Y16
LOC_Os09g24710	NA	alpha/beta hydrolase fold, putative, expressed	9	14711584	14716765	S9_14713992	T/C	9	14713992	4.73141e-05	0.293624	298	0.0223987	0.0791231	-2.52396	GY	Group2	Stress_Y16
LOC_Os09g24710	NA	alpha/beta hydrolase fold, putative, expressed	9	14711584	14716765	S9_14715104	C/A	9	14715104	9.76438e-05	0.298658	298	0.0223987	0.0743017	-1.30751	GY	Group2	Stress_Y16
LOC_Os09g25100	NA	CAMK_KIN1/SNF1/Nim1_like.35 - CAMK includes calcium/calmodulin depedent protein kinases, expressed	9	15027140	15028689	S9_15028070	T/A	9	15028070	2.09387e-05	0.0893939	330	0.0572766	0.111194	-2.77145	FGN	Group2	Stress_Y16
LOC_Os09g27800	NA	retrotransposon protein, putative, unclassified, expressed	9	16913699	16918174	S9_16914147	T/C	9	16914147	4.10045e-05	0.0835694	353	0.204667	0.244007	-0.917347	TSN	Group2	Stress_Y16
LOC_Os09g28960	NA	retrotransposon protein, putative, unclassified	9	17616113	17618685	S9_17617384	T/C	9	17617384	5.69384e-05	0.0651558	353	0.204667	0.242517	1.01115	TSN	Group2	Stress_Y16
LOC_Os09g30140	NA	expressed protein	9	18331039	18333054	S9_18332620	A/G	9	18332620	7.67183e-05	0.206718	387	0.00708178	0.0485179	-0.0242009	SN	Group2	Stress_Y16
LOC_Os09g38850	OsDEES1|OsWAK91	OsWAK91 - OsWAK receptor-like protein kinase, expressed	9	22315726	22318865	S9_22318659	A/G	9	22318659	8.7325e-05	0.219799	298	0.0223987	0.0750421	-0.723152	GY	Group2	Stress_Y16
LOC_Os09g38850	OsDEES1|OsWAK91	OsWAK91 - OsWAK receptor-like protein kinase, expressed	9	22315726	22318865	S9_22318660	G/T	9	22318660	7.77422e-05	0.216443	298	0.0223987	0.0758138	-0.524484	GY	Group2	Stress_Y16
LOC_Os10g04980	NA	OsFBX365 - F-box domain containing protein, expressed	10	2422055	2426567	S10_2423514	T/A	10	2423514	6.37396e-05	0.147692	325	0.0606353	0.108688	-1.59144	PN	Group2	Stress_Y16
LOC_Os10g05088	NA	GDSL-like lipase/acylhydrolase, putative, expressed	10	2492588	2496864	S10_2496300	C/T	10	2496300	4.18143e-05	0.0892351	353	0.204667	0.243918	0.139277	TSN	Group2	Stress_Y16
LOC_Os10g21110	NA	glycosyl hydrolase family 10 protein, putative, expressed	10	10727317	10730929	S10_10730139	A/G	10	10730139	8.93705e-05	0.133152	184	0.0118261	0.100063	-1.46173	PN	Group1	Stress_Y16
LOC_Os10g21350	NA	retrotransposon protein, putative, unclassified, expressed	10	10921402	10925971	S10_10925308	G/A	10	10925308	1.76425e-05	0.0869565	184	0.0118261	0.118696	-2.00241	PN	Group1	Stress_Y16
LOC_Os10g24700	NA	retrotransposon protein, putative, Ty3-gypsy subclass, expressed	10	12694529	12701385	S10_12698105	G/C	10	12698105	5.87362e-05	0.184564	298	0.0223987	0.0776795	-0.782685	GY	Group2	Stress_Y16
LOC_Os11g07850	OsPTP2	Protein-tyrosine phosphatase domain containing protein, expressed	11	4004806	4012434	S11_4011703	G/A	11	4011703	3.93447e-05	0.163077	325	0.0606353	0.11151	-1.98683	PN	Group2	Stress_Y16
LOC_Os11g07880	NA	expressed protein	11	4043517	4045934	S11_4044453	G/A	11	4044453	1.33987e-05	0.178462	325	0.0606353	0.117865	-0.0118162	PN	Group2	Stress_Y16
LOC_Os11g08040	NA	retrotransposon protein, putative, unclassified, expressed	11	4182609	4183800	S11_4183655	G/A	11	4183655	5.98791e-05	0.104615	325	0.0606353	0.109052	-0.599459	PN	Group2	Stress_Y16
LOC_Os11g08050	NA	expressed protein	11	4184192	4192034	S11_4185957	T/A	11	4185957	9.01266e-05	0.143077	325	0.0606353	0.106671	-0.50427	PN	Group2	Stress_Y16
LOC_Os11g08300	NA	aldehyde dehydrogenase, putative, expressed	11	4375281	4380044	S11_4375899	G/A	11	4375899	6.80851e-05	0.369732	261	0.014456	0.0773389	-0.0955257	SN	Group1	Stress_Y16
LOC_Os11g08300	NA	aldehyde dehydrogenase, putative, expressed	11	4375281	4380044	S11_4376702	G/A	11	4376702	8.73725e-05	0.40613	261	0.014456	0.0754124	0.409093	SN	Group1	Stress_Y16
LOC_Os11g08300	NA	aldehyde dehydrogenase, putative, expressed	11	4375281	4380044	S11_4377114	G/A	11	4377114	6.1643e-05	0.425287	261	0.014456	0.0781085	-0.112835	SN	Group1	Stress_Y16
LOC_Os11g08300	NA	aldehyde dehydrogenase, putative, expressed	11	4375281	4380044	S11_4377147	G/A	11	4377147	6.97652e-05	0.427203	261	0.014456	0.0771504	-1.22694	SN	Group1	Stress_Y16
LOC_Os11g19450	NA	expressed protein	11	11192583	11197027	S11_11192753	T/A	11	11192753	7.86505e-05	0.0633075	387	0.00708178	0.0483907	-0.156005	SN	Group2	Stress_Y16
LOC_Os11g22310	NA	retrotransposon protein, putative, unclassified, expressed	11	12787732	12793310	S11_12787884	C/T	11	12787884	7.97453e-05	0.0530303	330	0.0572766	0.103453	-2.5229	FGN	Group2	Stress_Y16
LOC_Os11g22330	NA	retrotransposon protein, putative, Ty3-gypsy subclass, expressed	11	12798673	12801870	S11_12801332	A/T	11	12801332	9.56269e-05	0.481818	220	0.0298025	0.100819	-0.452391	TGW	Group2	Stress_Y16
LOC_Os11g22330	NA	retrotransposon protein, putative, Ty3-gypsy subclass, expressed	11	12798673	12801870	S11_12801359	T/C	11	12801359	7.82063e-05	0.486364	220	0.0298025	0.102657	-0.0038762	TGW	Group2	Stress_Y16
LOC_Os11g22380	NA	retrotransposon protein, putative, unclassified	11	12835931	12836377	S11_12836057	C/A	11	12836057	3.14361e-05	0.0615385	325	0.0606353	0.112828	-1.21049	PN	Group2	Stress_Y16
LOC_Os11g23140	NA	retrotransposon protein, putative, unclassified, expressed	11	13314442	13321122	S11_13316787	A/G	11	13316787	4.87172e-05	0.477273	220	0.0298025	0.107005	0.121011	TGW	Group2	Stress_Y16
LOC_Os11g23236	NA	retrotransposon protein, putative, Ty3-gypsy subclass, expressed	11	13397380	13400558	S11_13398416	T/A	11	13398416	8.60452e-05	0.475	220	0.0298025	0.101783	-0.0543168	TGW	Group2	Stress_Y16
LOC_Os11g23810	NA	transposon protein, putative, CACTA, En/Spm sub-class	11	13474498	13479980	S11_13477189	A/G	11	13477189	9.7989e-05	0.0984848	330	0.0572766	0.102271	-2.20829	FGN	Group2	Stress_Y16
LOC_Os11g24300	NA	exostosin, putative, expressed	11	13844635	13848755	S11_13845183	G/A	11	13845183	9.49095e-05	0.0906516	353	0.204667	0.24021	4.57483	TSN	Group2	Stress_Y16
LOC_Os11g25380	NA	retrotransposon protein, putative, Ty3-gypsy subclass, expressed	11	14464689	14468915	S11_14468256	G/A	11	14468256	5.19605e-05	0.134091	220	0.0298025	0.106411	-0.201728	TGW	Group2	Stress_Y16
LOC_Os11g25380	NA	retrotransposon protein, putative, Ty3-gypsy subclass, expressed	11	14464689	14468915	S11_14468297	G/A	11	14468297	7.46216e-05	0.143182	220	0.0298025	0.103087	0.0175731	TGW	Group2	Stress_Y16
LOC_Os11g26400	NA	retrotransposon, putative, centromere-specific, expressed	11	15121576	15122679	S11_15122050	A/G	11	15122050	8.60531e-05	0.0659091	220	0.0298025	0.101782	0.271081	TGW	Group2	Stress_Y16
LOC_Os11g26700	NA	expressed protein	11	15289422	15292376	S11_15290704	C/T	11	15290704	1.68305e-05	0.05	220	0.0298025	0.116876	-0.790486	TGW	Group2	Stress_Y16
LOC_Os11g30660	NA	conserved hypothetical protein	11	17850032	17851153	S11_17850373	A/T	11	17850373	9.23409e-05	0.343066	137	-0.0194531	0.105274	NA	GY	Group1	Stress_Y16
LOC_Os11g30730	NA	transposon protein, putative, CACTA, En/Spm sub-class, expressed	11	17892627	17894420	S11_17893551	T/A	11	17893551	3.86826e-05	0.29562	137	-0.0194531	0.119603	1.03303	GY	Group1	Stress_Y16
LOC_Os11g31990	NA	retrotransposon protein, putative, unclassified, expressed	11	18847099	18853089	S11_18850821	A/G	11	18850821	8.43578e-05	0.0909091	330	0.0572766	0.10313	3.61146	FGN	Group2	Stress_Y16
LOC_Os11g39140	NA	thioredoxin domain-containing protein 9, putative, expressed	11	23295112	23298744	S11_23295230	A/G	11	23295230	7.36885e-05	0.304615	325	0.0606353	0.107842	2.78723	PN	Group2	Stress_Y16
LOC_Os11g39140	NA	thioredoxin domain-containing protein 9, putative, expressed	11	23295112	23298744	S11_23295234	T/G	11	23295234	5.51083e-05	0.266154	325	0.0606353	0.109537	-2.01197	PN	Group2	Stress_Y16
LOC_Os11g43950	NA	dnaJ domain containing protein, expressed	11	26542837	26549304	S11_26547146	T/C	11	26547146	5.18971e-05	0.118297	317	0.046649	0.0979489	-1.70008	SSR	Group2	Stress_Y16
LOC_Os11g43950	NA	dnaJ domain containing protein, expressed	11	26542837	26549304	S11_26547647	T/G	11	26547647	9.77405e-05	0.113565	317	0.046649	0.0941053	2.01999	SSR	Group2	Stress_Y16
LOC_Os11g43950	NA	dnaJ domain containing protein, expressed	11	26542837	26549304	S11_26547985	T/C	11	26547985	3.60764e-05	0.116719	317	0.046649	0.10017	-0.277315	SSR	Group2	Stress_Y16
LOC_Os11g43960	ER-ANT1	mitochondrial carrier protein, putative, expressed	11	26549874	26552470	S11_26550339	G/T	11	26550339	6.57055e-05	0.116719	317	0.046649	0.0965131	1.3535	SSR	Group2	Stress_Y16
LOC_Os11g43970	NA	AAA-type ATPase family protein, putative, expressed	11	26552934	26563341	S11_26555686	T/G	11	26555686	8.89301e-05	0.115142	317	0.046649	0.094677	1.21645	SSR	Group2	Stress_Y16
LOC_Os11g43970	NA	AAA-type ATPase family protein, putative, expressed	11	26552934	26563341	S11_26556765	C/A	11	26556765	1.68498e-05	0.113565	317	0.046649	0.104848	-0.596367	SSR	Group2	Stress_Y16
LOC_Os11g43970	NA	AAA-type ATPase family protein, putative, expressed	11	26552934	26563341	S11_26560465	A/G	11	26560465	4.63879e-05	0.116719	317	0.046649	0.0986332	-2.69695	SSR	Group2	Stress_Y16
LOC_Os11g43970	NA	AAA-type ATPase family protein, putative, expressed	11	26552934	26563341	S11_26561233	G/A	11	26561233	9.52974e-05	0.116719	317	0.046649	0.0942584	-0.92518	SSR	Group2	Stress_Y16
LOC_Os11g43970	NA	AAA-type ATPase family protein, putative, expressed	11	26552934	26563341	S11_26561677	A/G	11	26561677	4.65249e-05	0.118297	317	0.046649	0.0986152	-0.555555	SSR	Group2	Stress_Y16
LOC_Os11g44000	NA	expressed protein	11	26583733	26586572	S11_26585643	T/C	11	26585643	7.34245e-05	0.18612	317	0.046649	0.0958385	2.80873	SSR	Group2	Stress_Y16
LOC_Os11g44000	NA	expressed protein	11	26583733	26586572	S11_26585838	A/G	11	26585838	9.90975e-05	0.219243	317	0.046649	0.0940219	1.86991	SSR	Group2	Stress_Y16
LOC_Os11g44000	NA	expressed protein	11	26583733	26586572	S11_26585895	T/C	11	26585895	1.77106e-05	0.175079	317	0.046649	0.104541	-0.977544	SSR	Group2	Stress_Y16
LOC_Os11g47350	NA	beta-D-xylosidase, putative, expressed	11	28483676	28486502	S11_28485673	C/A	11	28485673	3.36548e-05	0.0597826	184	0.0118261	0.111222	-0.65337	PN	Group1	Stress_Y16
LOC_Os11g47350	NA	beta-D-xylosidase, putative, expressed	11	28483676	28486502	S11_28485826	C/T	11	28485826	8.70423e-05	0.0706522	184	0.0118261	0.100362	0.405952	PN	Group1	Stress_Y16
LOC_Os11g47350	NA	beta-D-xylosidase, putative, expressed	11	28483676	28486502	S11_28486090	C/T	11	28486090	8.53396e-05	0.076087	184	0.0118261	0.100586	0.531919	PN	Group1	Stress_Y16
LOC_Os11g47350	NA	beta-D-xylosidase, putative, expressed	11	28483676	28486502	S11_28486440	A/G	11	28486440	8.87754e-05	0.0788043	184	0.0118261	0.100139	NA	PN	Group1	Stress_Y16
LOC_Os11g47447	NA	stripe rust resistance protein Yr10, putative, expressed	11	28653511	28655918	S11_28653524	A/C	11	28653524	2.74926e-05	0.0842391	184	0.0118261	0.113554	NA	PN	Group1	Stress_Y16
LOC_Os11g47447	NA	stripe rust resistance protein Yr10, putative, expressed	11	28653511	28655918	S11_28654202	G/A	11	28654202	6.287e-05	0.076087	184	0.0118261	0.104061	NA	PN	Group1	Stress_Y16
LOC_Os11g47447	NA	stripe rust resistance protein Yr10, putative, expressed	11	28653511	28655918	S11_28654295	G/A	11	28654295	6.20072e-05	0.0842391	184	0.0118261	0.104219	0.520569	PN	Group1	Stress_Y16
LOC_Os11g47447	NA	stripe rust resistance protein Yr10, putative, expressed	11	28653511	28655918	S11_28654541	T/C	11	28654541	2.37542e-05	0.076087	184	0.0118261	0.115245	-0.62992	PN	Group1	Stress_Y16
LOC_Os11g47447	NA	stripe rust resistance protein Yr10, putative, expressed	11	28653511	28655918	S11_28655556	A/C	11	28655556	8.70423e-05	0.0706522	184	0.0118261	0.100362	0.428125	PN	Group1	Stress_Y16
LOC_Os11g47447	NA	stripe rust resistance protein Yr10, putative, expressed	11	28653511	28655918	S11_28655561	A/G	11	28655561	8.70423e-05	0.0706522	184	0.0118261	0.100362	-0.0629064	PN	Group1	Stress_Y16
LOC_Os11g47447	NA	stripe rust resistance protein Yr10, putative, expressed	11	28653511	28655918	S11_28655782	A/G	11	28655782	5.30364e-05	0.0679348	184	0.0118261	0.106003	-0.197324	PN	Group1	Stress_Y16
LOC_Os11g47447	NA	stripe rust resistance protein Yr10, putative, expressed	11	28653511	28655918	S11_28655817	G/C	11	28655817	5.30643e-05	0.0788043	184	0.0118261	0.105997	-0.54257	PN	Group1	Stress_Y16
LOC_Os11g47460	NA	MYB family transcription factor, putative, expressed	11	28703899	28705306	S11_28705138	C/A	11	28705138	9.97192e-05	0.0679348	184	0.0118261	0.0988221	0.776449	PN	Group1	Stress_Y16
LOC_Os11g47460	NA	MYB family transcription factor, putative, expressed	11	28703899	28705306	S11_28705145	G/A	11	28705145	7.21168e-05	0.0652174	184	0.0118261	0.102498	0.684036	PN	Group1	Stress_Y16
LOC_Os11g47460	NA	MYB family transcription factor, putative, expressed	11	28703899	28705306	S11_28705147	C/T	11	28705147	7.21168e-05	0.0652174	184	0.0118261	0.102498	-0.642871	PN	Group1	Stress_Y16
LOC_Os11g47460	NA	MYB family transcription factor, putative, expressed	11	28703899	28705306	S11_28705161	G/A	11	28705161	6.76113e-05	0.0679348	184	0.0118261	0.103233	-0.521887	PN	Group1	Stress_Y16
LOC_Os11g47460	NA	MYB family transcription factor, putative, expressed	11	28703899	28705306	S11_28705185	A/G	11	28705185	7.21168e-05	0.0652174	184	0.0118261	0.102498	-0.49166	PN	Group1	Stress_Y16
LOC_Os11g47460	NA	MYB family transcription factor, putative, expressed	11	28703899	28705306	S11_28705273	C/T	11	28705273	8.7608e-05	0.0706522	184	0.0118261	0.100289	0.574513	PN	Group1	Stress_Y16
LOC_Os11g47480	NA	expressed protein	11	28713310	28715426	S11_28715364	A/G	11	28715364	6.78563e-05	0.0652174	184	0.0118261	0.103192	-0.321568	PN	Group1	Stress_Y16
LOC_Os11g47480	NA	expressed protein	11	28713310	28715426	S11_28715365	G/T	11	28715365	5.4862e-05	0.0625	184	0.0118261	0.105616	0.255665	PN	Group1	Stress_Y16
LOC_Os11g47480	NA	expressed protein	11	28713310	28715426	S11_28715368	A/G	11	28715368	6.78563e-05	0.0652174	184	0.0118261	0.103192	-0.0766036	PN	Group1	Stress_Y16
LOC_Os11g47530	NA	glycosyl hydrolase, putative, expressed	11	28733117	28734280	S11_28733787	A/C	11	28733787	1.3473e-05	0.168478	184	0.0118261	0.121839	-0.0172617	PN	Group1	Stress_Y16
LOC_Os12g01200	NA	senescence-induced receptor-like serine/threonine-protein kinase precursor, putative, expressed	12	112744	120807	S12_116175	A/G	12	116175	8.39531e-05	0.21813	353	0.204667	0.240762	0.663459	TSN	Group2	Stress_Y16
LOC_Os12g07870	NA	dehydration response related protein, putative, expressed	12	3979312	3981227	S12_3980322	A/G	12	3980322	3.50803e-05	0.118182	330	0.0572766	0.108193	-0.897434	FGN	Group2	Stress_Y16
LOC_Os12g08240	NA	expressed protein	12	4203828	4206452	S12_4205661	T/C	12	4205661	7.26488e-05	0.234848	330	0.0572766	0.103989	-1.31714	FGN	Group2	Stress_Y16
LOC_Os12g08240	NA	expressed protein	12	4203828	4206452	S12_4205881	T/A	12	4205881	3.9791e-05	0.112121	330	0.0572766	0.107463	3.47749	FGN	Group2	Stress_Y16
LOC_Os12g08240	NA	expressed protein	12	4203828	4206452	S12_4206398	T/C	12	4206398	7.7892e-05	0.272727	330	0.0572766	0.103588	0.108806	FGN	Group2	Stress_Y16
LOC_Os12g08250	NA	expressed protein	12	4207353	4207769	S12_4207604	A/G	12	4207604	5.27735e-05	0.118182	330	0.0572766	0.10583	-1.13987	FGN	Group2	Stress_Y16
LOC_Os12g08260	NA	dehydrogenase E1 component domain containing protein, expressed	12	4209130	4213475	S12_4209887	G/T	12	4209887	5.20783e-05	0.1	330	0.0572766	0.105907	4.37577	FGN	Group2	Stress_Y16
LOC_Os12g08270	NA	inositol-1-monophosphatase, putative, expressed	12	4213191	4216353	S12_4214215	C/T	12	4214215	5.31889e-05	0.164038	317	0.046649	0.097799	-1.04714	SSR	Group2	Stress_Y16
LOC_Os12g08270	NA	inositol-1-monophosphatase, putative, expressed	12	4213191	4216353	S12_4214223	G/A	12	4214223	2.11229e-05	0.164038	317	0.046649	0.103455	0.638959	SSR	Group2	Stress_Y16
LOC_Os12g08270	NA	inositol-1-monophosphatase, putative, expressed	12	4213191	4216353	S12_4214343	T/C	12	4214343	2.62735e-05	0.160883	317	0.046649	0.102113	0.891789	SSR	Group2	Stress_Y16
LOC_Os12g08270	NA	inositol-1-monophosphatase, putative, expressed	12	4213191	4216353	S12_4214343	T/C	12	4214343	5.5239e-05	0.165152	330	0.0572766	0.105567	-1.39694	FGN	Group2	Stress_Y16
LOC_Os12g08270	NA	inositol-1-monophosphatase, putative, expressed	12	4213191	4216353	S12_4214360	T/C	12	4214360	3.62002e-05	0.157729	317	0.046649	0.100149	-0.132834	SSR	Group2	Stress_Y16
LOC_Os12g08270	NA	inositol-1-monophosphatase, putative, expressed	12	4213191	4216353	S12_4214537	T/C	12	4214537	9.17283e-05	0.156151	317	0.046649	0.0944894	0.866522	SSR	Group2	Stress_Y16
LOC_Os12g08270	NA	inositol-1-monophosphatase, putative, expressed	12	4213191	4216353	S12_4214566	A/T	12	4214566	5.78413e-05	0.162461	317	0.046649	0.0972884	-0.536795	SSR	Group2	Stress_Y16
LOC_Os12g08270	NA	inositol-1-monophosphatase, putative, expressed	12	4213191	4216353	S12_4214566	A/T	12	4214566	7.49274e-05	0.168182	330	0.0572766	0.103811	2.41302	FGN	Group2	Stress_Y16
LOC_Os12g08270	NA	inositol-1-monophosphatase, putative, expressed	12	4213191	4216353	S12_4215193	C/G	12	4215193	8.14798e-05	0.159306	317	0.046649	0.0952071	-0.255445	SSR	Group2	Stress_Y16
LOC_Os12g08270	NA	inositol-1-monophosphatase, putative, expressed	12	4213191	4216353	S12_4215225	A/C	12	4215225	6.81312e-05	0.152997	317	0.046649	0.0962928	-0.0521379	SSR	Group2	Stress_Y16
LOC_Os12g08270	NA	inositol-1-monophosphatase, putative, expressed	12	4213191	4216353	S12_4215293	T/C	12	4215293	9.3278e-05	0.157729	317	0.046649	0.094388	-0.342724	SSR	Group2	Stress_Y16
LOC_Os12g08270	NA	inositol-1-monophosphatase, putative, expressed	12	4213191	4216353	S12_4215701	A/G	12	4215701	6.62699e-05	0.152997	317	0.046649	0.0964611	0.273563	SSR	Group2	Stress_Y16
LOC_Os12g08270	NA	inositol-1-monophosphatase, putative, expressed	12	4213191	4216353	S12_4216046	A/C	12	4216046	4.39216e-05	0.162461	317	0.046649	0.0989667	-0.768446	SSR	Group2	Stress_Y16
LOC_Os12g08280	OsSAL1|RHL	inositol-1-monophosphatase, putative, expressed	12	4216563	4219484	S12_4216810	C/T	12	4216810	8.79325e-05	0.1	330	0.0572766	0.102892	0.429897	FGN	Group2	Stress_Y16
LOC_Os12g08280	OsSAL1|RHL	inositol-1-monophosphatase, putative, expressed	12	4216563	4219484	S12_4217649	C/A	12	4217649	2.43537e-05	0.156151	317	0.046649	0.10258	-2.68621	SSR	Group2	Stress_Y16
LOC_Os12g08280	OsSAL1|RHL	inositol-1-monophosphatase, putative, expressed	12	4216563	4219484	S12_4217649	C/A	12	4217649	3.02555e-05	0.162121	330	0.0572766	0.109052	-1.11178	FGN	Group2	Stress_Y16
LOC_Os12g08280	OsSAL1|RHL	inositol-1-monophosphatase, putative, expressed	12	4216563	4219484	S12_4217772	T/G	12	4217772	2.31194e-05	0.165615	317	0.046649	0.102899	-1.26863	SSR	Group2	Stress_Y16
LOC_Os12g08280	OsSAL1|RHL	inositol-1-monophosphatase, putative, expressed	12	4216563	4219484	S12_4217925	T/G	12	4217925	9.93078e-05	0.162461	317	0.046649	0.0940091	0.680941	SSR	Group2	Stress_Y16
LOC_Os12g08280	OsSAL1|RHL	inositol-1-monophosphatase, putative, expressed	12	4216563	4219484	S12_4217941	G/C	12	4217941	6.37208e-05	0.162121	330	0.0572766	0.104743	0.665816	FGN	Group2	Stress_Y16
LOC_Os12g08280	OsSAL1|RHL	inositol-1-monophosphatase, putative, expressed	12	4216563	4219484	S12_4217941	G/C	12	4217941	9.84002e-05	0.156151	317	0.046649	0.0940646	-1.02927	SSR	Group2	Stress_Y16
LOC_Os12g08280	OsSAL1|RHL	inositol-1-monophosphatase, putative, expressed	12	4216563	4219484	S12_4218019	A/T	12	4218019	6.2772e-05	0.159091	330	0.0572766	0.10483	1.74523	FGN	Group2	Stress_Y16
LOC_Os12g08280	OsSAL1|RHL	inositol-1-monophosphatase, putative, expressed	12	4216563	4219484	S12_4218019	A/T	12	4218019	1.52725e-05	0.152997	317	0.046649	0.105455	-0.121687	SSR	Group2	Stress_Y16
LOC_Os12g08280	OsSAL1|RHL	inositol-1-monophosphatase, putative, expressed	12	4216563	4219484	S12_4218021	T/C	12	4218021	5.26111e-05	0.159306	317	0.046649	0.0978656	-1.28226	SSR	Group2	Stress_Y16
LOC_Os12g08280	OsSAL1|RHL	inositol-1-monophosphatase, putative, expressed	12	4216563	4219484	S12_4218056	C/G	12	4218056	8.34372e-05	0.159306	317	0.046649	0.0950632	-1.43847	SSR	Group2	Stress_Y16
LOC_Os12g08280	OsSAL1|RHL	inositol-1-monophosphatase, putative, expressed	12	4216563	4219484	S12_4218072	C/T	12	4218072	4.14223e-05	0.156151	317	0.046649	0.0993246	0.385299	SSR	Group2	Stress_Y16
LOC_Os12g08280	OsSAL1|RHL	inositol-1-monophosphatase, putative, expressed	12	4216563	4219484	S12_4218089	A/G	12	4218089	9.88749e-05	0.163636	330	0.0572766	0.102219	1.63036	FGN	Group2	Stress_Y16
LOC_Os12g08280	OsSAL1|RHL	inositol-1-monophosphatase, putative, expressed	12	4216563	4219484	S12_4218089	A/G	12	4218089	6.31897e-05	0.157729	317	0.046649	0.0967504	-0.163474	SSR	Group2	Stress_Y16
LOC_Os12g08280	OsSAL1|RHL	inositol-1-monophosphatase, putative, expressed	12	4216563	4219484	S12_4218109	C/T	12	4218109	9.85676e-05	0.159306	317	0.046649	0.0940544	0.426867	SSR	Group2	Stress_Y16
LOC_Os12g08280	OsSAL1|RHL	inositol-1-monophosphatase, putative, expressed	12	4216563	4219484	S12_4218359	A/T	12	4218359	8.87566e-06	0.154574	317	0.046649	0.108817	0.421614	SSR	Group2	Stress_Y16
LOC_Os12g08280	OsSAL1|RHL	inositol-1-monophosphatase, putative, expressed	12	4216563	4219484	S12_4218359	A/T	12	4218359	1.07957e-05	0.160606	330	0.0572766	0.11507	-1.43978	FGN	Group2	Stress_Y16
LOC_Os12g08280	OsSAL1|RHL	inositol-1-monophosphatase, putative, expressed	12	4216563	4219484	S12_4218363	C/T	12	4218363	7.71902e-06	0.154574	317	0.046649	0.109685	-1.23302	SSR	Group2	Stress_Y16
LOC_Os12g08280	OsSAL1|RHL	inositol-1-monophosphatase, putative, expressed	12	4216563	4219484	S12_4218363	C/T	12	4218363	7.90449e-06	0.160606	330	0.0572766	0.116903	-0.149401	FGN	Group2	Stress_Y16
LOC_Os12g08280	OsSAL1|RHL	inositol-1-monophosphatase, putative, expressed	12	4216563	4219484	S12_4218385	A/G	12	4218385	1.45492e-05	0.154574	317	0.046649	0.105755	-0.43314	SSR	Group2	Stress_Y16
LOC_Os12g08280	OsSAL1|RHL	inositol-1-monophosphatase, putative, expressed	12	4216563	4219484	S12_4218385	A/G	12	4218385	2.0408e-05	0.159091	330	0.0572766	0.111343	0.275192	FGN	Group2	Stress_Y16
LOC_Os12g08280	OsSAL1|RHL	inositol-1-monophosphatase, putative, expressed	12	4216563	4219484	S12_4218394	A/G	12	4218394	9.12145e-05	0.159091	330	0.0572766	0.102682	-0.64168	FGN	Group2	Stress_Y16
LOC_Os12g08280	OsSAL1|RHL	inositol-1-monophosphatase, putative, expressed	12	4216563	4219484	S12_4218394	A/G	12	4218394	7.2638e-05	0.152997	317	0.046649	0.0959039	-1.06614	SSR	Group2	Stress_Y16
LOC_Os12g08280	OsSAL1|RHL	inositol-1-monophosphatase, putative, expressed	12	4216563	4219484	S12_4218717	G/A	12	4218717	8.84513e-05	0.156061	330	0.0572766	0.102858	-1.22216	FGN	Group2	Stress_Y16
LOC_Os12g08280	OsSAL1|RHL	inositol-1-monophosphatase, putative, expressed	12	4216563	4219484	S12_4218717	G/A	12	4218717	3.76428e-05	0.149842	317	0.046649	0.0999095	0.438299	SSR	Group2	Stress_Y16
LOC_Os12g08280	OsSAL1|RHL	inositol-1-monophosphatase, putative, expressed	12	4216563	4219484	S12_4218726	T/C	12	4218726	5.15515e-05	0.148265	317	0.046649	0.0979896	-0.41702	SSR	Group2	Stress_Y16
LOC_Os12g08280	OsSAL1|RHL	inositol-1-monophosphatase, putative, expressed	12	4216563	4219484	S12_4218726	T/C	12	4218726	9.24782e-05	0.154545	330	0.0572766	0.102603	-0.758375	FGN	Group2	Stress_Y16
LOC_Os12g08280	OsSAL1|RHL	inositol-1-monophosphatase, putative, expressed	12	4216563	4219484	S12_4218811	A/T	12	4218811	9.54992e-05	0.149842	317	0.046649	0.0942456	0.627933	SSR	Group2	Stress_Y16
LOC_Os12g08280	OsSAL1|RHL	inositol-1-monophosphatase, putative, expressed	12	4216563	4219484	S12_4218859	A/G	12	4218859	7.4646e-05	0.149842	317	0.046649	0.0957384	-0.358092	SSR	Group2	Stress_Y16
LOC_Os12g08280	OsSAL1|RHL	inositol-1-monophosphatase, putative, expressed	12	4216563	4219484	S12_4218963	T/G	12	4218963	9.65381e-05	0.127273	330	0.0572766	0.102356	-0.440957	FGN	Group2	Stress_Y16
LOC_Os12g08280	OsSAL1|RHL	inositol-1-monophosphatase, putative, expressed	12	4216563	4219484	S12_4218964	C/A	12	4218964	9.65381e-05	0.127273	330	0.0572766	0.102356	0.109872	FGN	Group2	Stress_Y16
LOC_Os12g08280	OsSAL1|RHL	inositol-1-monophosphatase, putative, expressed	12	4216563	4219484	S12_4218967	G/A	12	4218967	6.36663e-05	0.125758	330	0.0572766	0.104748	1.22031	FGN	Group2	Stress_Y16
LOC_Os12g08280	OsSAL1|RHL	inositol-1-monophosphatase, putative, expressed	12	4216563	4219484	S12_4218969	G/C	12	4218969	6.66137e-05	0.128788	330	0.0572766	0.104488	-1.34073	FGN	Group2	Stress_Y16
LOC_Os12g08280	OsSAL1|RHL	inositol-1-monophosphatase, putative, expressed	12	4216563	4219484	S12_4218976	A/G	12	4218976	6.44211e-05	0.159091	330	0.0572766	0.10468	-1.23305	FGN	Group2	Stress_Y16
LOC_Os12g08280	OsSAL1|RHL	inositol-1-monophosphatase, putative, expressed	12	4216563	4219484	S12_4218976	A/G	12	4218976	1.79625e-05	0.15142	317	0.046649	0.104454	-0.839496	SSR	Group2	Stress_Y16
LOC_Os12g08280	OsSAL1|RHL	inositol-1-monophosphatase, putative, expressed	12	4216563	4219484	S12_4218987	G/T	12	4218987	7.68897e-05	0.160606	330	0.0572766	0.103662	0.345685	FGN	Group2	Stress_Y16
LOC_Os12g08280	OsSAL1|RHL	inositol-1-monophosphatase, putative, expressed	12	4216563	4219484	S12_4218987	G/T	12	4218987	1.59637e-05	0.152997	317	0.046649	0.105181	0.132575	SSR	Group2	Stress_Y16
LOC_Os12g08280	OsSAL1|RHL	inositol-1-monophosphatase, putative, expressed	12	4216563	4219484	S12_4219094	C/G	12	4219094	1.67594e-05	0.152997	317	0.046649	0.104881	0.38299	SSR	Group2	Stress_Y16
LOC_Os12g08280	OsSAL1|RHL	inositol-1-monophosphatase, putative, expressed	12	4216563	4219484	S12_4219094	C/G	12	4219094	5.44203e-05	0.159091	330	0.0572766	0.105653	-0.0758896	FGN	Group2	Stress_Y16
LOC_Os12g08280	OsSAL1|RHL	inositol-1-monophosphatase, putative, expressed	12	4216563	4219484	S12_4219124	T/A	12	4219124	1.5699e-05	0.154574	317	0.046649	0.105285	0.649734	SSR	Group2	Stress_Y16
LOC_Os12g08280	OsSAL1|RHL	inositol-1-monophosphatase, putative, expressed	12	4216563	4219484	S12_4219124	T/A	12	4219124	8.43274e-05	0.160606	330	0.0572766	0.103132	-6.28982	FGN	Group2	Stress_Y16
LOC_Os12g08280	OsSAL1|RHL	inositol-1-monophosphatase, putative, expressed	12	4216563	4219484	S12_4219156	G/A	12	4219156	7.85223e-05	0.160883	317	0.046649	0.0954313	0.220665	SSR	Group2	Stress_Y16
LOC_Os12g08280	OsSAL1|RHL	inositol-1-monophosphatase, putative, expressed	12	4216563	4219484	S12_4219159	T/C	12	4219159	7.76346e-05	0.162461	317	0.046649	0.0955002	6.61188	SSR	Group2	Stress_Y16
LOC_Os12g08280	OsSAL1|RHL	inositol-1-monophosphatase, putative, expressed	12	4216563	4219484	S12_4219199	A/C	12	4219199	6.18213e-05	0.157729	317	0.046649	0.0968835	-0.0287853	SSR	Group2	Stress_Y16
LOC_Os12g08280	OsSAL1|RHL	inositol-1-monophosphatase, putative, expressed	12	4216563	4219484	S12_4219208	G/C	12	4219208	3.91653e-05	0.154574	317	0.046649	0.099667	-0.375984	SSR	Group2	Stress_Y16
LOC_Os12g08280	OsSAL1|RHL	inositol-1-monophosphatase, putative, expressed	12	4216563	4219484	S12_4219208	G/C	12	4219208	7.03044e-05	0.160606	330	0.0572766	0.104177	-0.295831	FGN	Group2	Stress_Y16
LOC_Os12g08280	OsSAL1|RHL	inositol-1-monophosphatase, putative, expressed	12	4216563	4219484	S12_4219315	G/A	12	4219315	3.45872e-05	0.12776	317	0.046649	0.100428	-0.115084	SSR	Group2	Stress_Y16
LOC_Os12g08280	OsSAL1|RHL	inositol-1-monophosphatase, putative, expressed	12	4216563	4219484	S12_4219315	G/A	12	4219315	4.68101e-05	0.131818	330	0.0572766	0.106523	-0.87706	FGN	Group2	Stress_Y16
LOC_Os12g08280	OsSAL1|RHL	inositol-1-monophosphatase, putative, expressed	12	4216563	4219484	S12_4219317	G/A	12	4219317	2.36879e-05	0.126183	317	0.046649	0.10275	-8.22673	SSR	Group2	Stress_Y16
LOC_Os12g08280	OsSAL1|RHL	inositol-1-monophosphatase, putative, expressed	12	4216563	4219484	S12_4219317	G/A	12	4219317	3.19869e-05	0.130303	330	0.0572766	0.108728	-0.152255	FGN	Group2	Stress_Y16
LOC_Os12g08280	OsSAL1|RHL	inositol-1-monophosphatase, putative, expressed	12	4216563	4219484	S12_4219353	A/G	12	4219353	5.04243e-05	0.15142	317	0.046649	0.0981244	-0.372322	SSR	Group2	Stress_Y16
LOC_Os12g08280	OsSAL1|RHL	inositol-1-monophosphatase, putative, expressed	12	4216563	4219484	S12_4219377	C/G	12	4219377	6.81297e-05	0.146688	317	0.046649	0.0962929	0.360081	SSR	Group2	Stress_Y16
LOC_Os12g08280	OsSAL1|RHL	inositol-1-monophosphatase, putative, expressed	12	4216563	4219484	S12_4219451	A/C	12	4219451	1.19346e-05	0.140909	330	0.0572766	0.114481	NA	FGN	Group2	Stress_Y16
LOC_Os12g08280	OsSAL1|RHL	inositol-1-monophosphatase, putative, expressed	12	4216563	4219484	S12_4219451	A/C	12	4219451	2.9724e-05	0.137224	317	0.046649	0.101356	NA	SSR	Group2	Stress_Y16
LOC_Os12g08360	NA	expressed protein	12	4252924	4255134	S12_4253271	A/G	12	4253271	9.89382e-05	0.143939	330	0.0572766	0.102216	-0.0368743	FGN	Group2	Stress_Y16
LOC_Os12g12590	NA	NADP-dependent oxidoreductase, putative, expressed	12	6932582	6937071	S12_6934399	A/G	12	6934399	1.59302e-06	0.0991501	353	0.204667	0.259011	-0.549157	TSN	Group2	Stress_Y16
LOC_Os12g24410	NA	expressed protein	12	13924803	13932562	S12_13930075	G/C	12	13930075	9.89466e-05	0.0906516	353	0.204667	0.240022	-2.44652	TSN	Group2	Stress_Y16
LOC_Os12g25510	NA	retrotransposon protein, putative, unclassified, expressed	12	14762385	14767931	S12_14765416	T/C	12	14765416	6.68584e-06	0.470769	325	0.0606353	0.122005	-1.03217	PN	Group2	Stress_Y16
LOC_Os12g25520	NA	transposon protein, putative, unclassified, expressed	12	14775174	14777281	S12_14775998	G/A	12	14775998	1.96695e-05	0.384615	325	0.0606353	0.115592	0.0864421	PN	Group2	Stress_Y16
LOC_Os12g25640	NA	SAP domain containing protein, expressed	12	14838519	14845431	S12_14845165	A/C	12	14845165	2.73245e-05	0.493846	325	0.0606353	0.113653	0.327655	PN	Group2	Stress_Y16
LOC_Os12g25680	NA	Papain family cysteine protease domain containing protein, expressed	12	14883197	14885538	S12_14884948	T/C	12	14884948	5.39485e-05	0.427692	325	0.0606353	0.109662	-0.0346851	PN	Group2	Stress_Y16
LOC_Os12g26740	NA	retrotransposon protein, putative, unclassified, expressed	12	15669838	15672752	S12_15672078	T/C	12	15672078	1.87894e-05	0.101538	325	0.0606353	0.115863	-1.89981	PN	Group2	Stress_Y16
LOC_Os12g27460	NA	retrotransposon protein, putative, unclassified	12	16156063	16157956	S12_16157494	A/G	12	16157494	7.11572e-05	0.0772727	220	0.0298025	0.103522	0.468955	TGW	Group2	Stress_Y16
LOC_Os12g30180	NA	protein kinase domain containing protein, expressed	12	18115908	18120680	S12_18119722	T/C	12	18119722	6.68013e-05	0.0727273	330	0.0572766	0.104471	1.30216	FGN	Group2	Stress_Y16
LOC_Os01g04600	NA	expressed protein	1	2063612	2066083	S1_2066057	C/A	1	2066057	1.11314e-05	0.262452	261	0.291989	0.347346	-3.11533	HD	Group1	Stress_Y17
LOC_Os01g04610	NA	hypothetical protein	1	2068588	2069263	S1_2068891	A/C	1	2068891	1.2614e-05	0.243295	261	0.291989	0.346636	NA	HD	Group1	Stress_Y17
LOC_Os01g04660	NA	lipid phosphatase protein, putative, expressed	1	2097192	2100694	S1_2097535	A/T	1	2097535	6.74766e-05	0.264368	261	0.291989	0.337214	-0.930135	HD	Group1	Stress_Y17
LOC_Os01g04660	NA	lipid phosphatase protein, putative, expressed	1	2097192	2100694	S1_2097624	A/C	1	2097624	5.35742e-05	0.256705	261	0.291989	0.338499	NA	HD	Group1	Stress_Y17
LOC_Os01g04660	NA	lipid phosphatase protein, putative, expressed	1	2097192	2100694	S1_2098420	A/T	1	2098420	8.33897e-05	0.254789	261	0.291989	0.336039	-3.17501	HD	Group1	Stress_Y17
LOC_Os01g05540	NA	expressed protein	1	2640937	2644665	S1_2643077	A/C	1	2643077	6.39903e-05	0.165385	260	0.00614855	0.0703037	0.114738	TGW	Group2	Stress_Y17
LOC_Os01g05540	NA	expressed protein	1	2640937	2644665	S1_2644098	A/G	1	2644098	3.09686e-05	0.152778	216	0.101872	0.178703	-0.33429	TSN	Group1	Stress_Y17
LOC_Os01g05550	NA	expressed protein	1	2651134	2651589	S1_2651200	A/T	1	2651200	5.96034e-05	0.152778	216	0.101872	0.172992	12.41	TSN	Group1	Stress_Y17
LOC_Os01g05780	NA	expressed protein	1	2759369	2761393	S1_2759654	T/C	1	2759654	9.32486e-05	0.37963	216	0.101872	0.169119	13.2422	TSN	Group1	Stress_Y17
LOC_Os01g06080	NA	expressed protein	1	2901602	2903619	S1_2902933	A/T	1	2902933	4.8455e-05	0.362791	215	0.0572061	0.134131	1.88612	FGN	Group1	Stress_Y17
LOC_Os01g06080	NA	expressed protein	1	2901602	2903619	S1_2902933	A/T	1	2902933	9.82997e-05	0.372685	216	0.101872	0.168665	-6.48882	TSN	Group1	Stress_Y17
LOC_Os01g06140	NA	expressed protein	1	2925935	2928765	S1_2926503	C/T	1	2926503	7.7669e-05	0.37907	215	0.0572061	0.129811	NA	FGN	Group1	Stress_Y17
LOC_Os01g06140	NA	expressed protein	1	2925935	2928765	S1_2927141	A/G	1	2927141	9.02203e-05	0.351163	215	0.0572061	0.128446	3.35378	FGN	Group1	Stress_Y17
LOC_Os01g06250	NA	dirigent, putative, expressed	1	2966324	2967346	S1_2967184	G/A	1	2967184	6.04477e-05	0.362791	215	0.0572061	0.132103	-4.8085	FGN	Group1	Stress_Y17
LOC_Os01g06250	NA	dirigent, putative, expressed	1	2966324	2967346	S1_2967225	T/C	1	2967225	7.8035e-05	0.372093	215	0.0572061	0.129768	1.39049	FGN	Group1	Stress_Y17
LOC_Os01g06270	NA	expressed protein	1	2971125	2979313	S1_2972739	A/G	1	2972739	4.52979e-05	0.286047	215	0.0572061	0.134751	7.30537	FGN	Group1	Stress_Y17
LOC_Os01g06454	NA	heat shock protein DnaJ, putative, expressed	1	3041412	3044348	S1_3043265	C/T	1	3043265	8.94876e-05	0.362791	215	0.0572061	0.12852	-3.81436	FGN	Group1	Stress_Y17
LOC_Os01g06460	NA	uncharacterized Cys-rich domain containing protein, putative, expressed	1	3044483	3047221	S1_3046029	C/T	1	3046029	8.47952e-05	0.35814	215	0.0572061	0.129011	-1.66586	FGN	Group1	Stress_Y17
LOC_Os01g06460	NA	uncharacterized Cys-rich domain containing protein, putative, expressed	1	3044483	3047221	S1_3046380	T/G	1	3046380	3.10831e-05	0.35814	215	0.0572061	0.138224	-5.86688	FGN	Group1	Stress_Y17
LOC_Os01g06470	alpha2	expressed protein	1	3047504	3051989	S1_3048572	T/A	1	3048572	7.12124e-05	0.360465	215	0.0572061	0.130603	0.392621	FGN	Group1	Stress_Y17
LOC_Os01g06470	alpha2	expressed protein	1	3047504	3051989	S1_3049506	G/T	1	3049506	5.36708e-05	0.367442	215	0.0572061	0.133193	-4.29879	FGN	Group1	Stress_Y17
LOC_Os01g06470	alpha2	expressed protein	1	3047504	3051989	S1_3049506	G/T	1	3049506	8.89127e-05	0.37963	216	0.101872	0.16953	-12.0279	TSN	Group1	Stress_Y17
LOC_Os01g06490	NA	OsSCP1 - Putative Serine Carboxypeptidase homologue, expressed	1	3054465	3057198	S1_3054501	G/T	1	3054501	9.59e-05	0.353488	215	0.0572061	0.12789	0.678871	FGN	Group1	Stress_Y17
LOC_Os01g06490	NA	OsSCP1 - Putative Serine Carboxypeptidase homologue, expressed	1	3054465	3057198	S1_3054597	G/T	1	3054597	4.84483e-05	0.362791	215	0.0572061	0.134132	-0.0167447	FGN	Group1	Stress_Y17
LOC_Os01g06490	NA	OsSCP1 - Putative Serine Carboxypeptidase homologue, expressed	1	3054465	3057198	S1_3054604	C/A	1	3054604	4.89718e-05	0.360465	215	0.0572061	0.134034	-2.38968	FGN	Group1	Stress_Y17
LOC_Os01g06490	NA	OsSCP1 - Putative Serine Carboxypeptidase homologue, expressed	1	3054465	3057198	S1_3054965	C/A	1	3054965	8.56361e-05	0.35814	215	0.0572061	0.128921	1.69153	FGN	Group1	Stress_Y17
LOC_Os01g06490	NA	OsSCP1 - Putative Serine Carboxypeptidase homologue, expressed	1	3054465	3057198	S1_3054976	C/G	1	3054976	8.7176e-05	0.355814	215	0.0572061	0.128758	NA	FGN	Group1	Stress_Y17
LOC_Os01g06490	NA	OsSCP1 - Putative Serine Carboxypeptidase homologue, expressed	1	3054465	3057198	S1_3054986	A/T	1	3054986	6.52462e-05	0.37037	216	0.101872	0.172207	-9.18532	TSN	Group1	Stress_Y17
LOC_Os01g06490	NA	OsSCP1 - Putative Serine Carboxypeptidase homologue, expressed	1	3054465	3057198	S1_3054986	A/T	1	3054986	4.00027e-05	0.35814	215	0.0572061	0.135895	-3.84012	FGN	Group1	Stress_Y17
LOC_Os01g06490	NA	OsSCP1 - Putative Serine Carboxypeptidase homologue, expressed	1	3054465	3057198	S1_3054997	A/G	1	3054997	5.87121e-05	0.35814	215	0.0572061	0.132369	-3.40489	FGN	Group1	Stress_Y17
LOC_Os01g06490	NA	OsSCP1 - Putative Serine Carboxypeptidase homologue, expressed	1	3054465	3057198	S1_3056062	T/A	1	3056062	9.18137e-05	0.360465	215	0.0572061	0.128286	2.37035	FGN	Group1	Stress_Y17
LOC_Os01g06490	NA	OsSCP1 - Putative Serine Carboxypeptidase homologue, expressed	1	3054465	3057198	S1_3056407	C/T	1	3056407	1.25284e-05	0.367442	215	0.0572061	0.146679	NA	FGN	Group1	Stress_Y17
LOC_Os01g06490	NA	OsSCP1 - Putative Serine Carboxypeptidase homologue, expressed	1	3054465	3057198	S1_3056834	A/G	1	3056834	1.69344e-05	0.365116	215	0.0572061	0.143863	NA	FGN	Group1	Stress_Y17
LOC_Os01g06500	NA	PHLOEM 2-LIKE A5, putative, expressed	1	3058543	3059717	S1_3058936	A/G	1	3058936	9.72092e-05	0.365116	215	0.0572061	0.127767	NA	FGN	Group1	Stress_Y17
LOC_Os01g06500	NA	PHLOEM 2-LIKE A5, putative, expressed	1	3058543	3059717	S1_3059047	A/G	1	3059047	8.07238e-05	0.362791	215	0.0572061	0.129459	-2.32368	FGN	Group1	Stress_Y17
LOC_Os01g06500	NA	PHLOEM 2-LIKE A5, putative, expressed	1	3058543	3059717	S1_3059096	A/T	1	3059096	8.35054e-05	0.360465	215	0.0572061	0.12915	0.302359	FGN	Group1	Stress_Y17
LOC_Os01g06500	NA	PHLOEM 2-LIKE A5, putative, expressed	1	3058543	3059717	S1_3059171	T/C	1	3059171	5.62994e-05	0.360465	215	0.0572061	0.132754	-6.08856	FGN	Group1	Stress_Y17
LOC_Os01g06500	NA	PHLOEM 2-LIKE A5, putative, expressed	1	3058543	3059717	S1_3059274	C/A	1	3059274	8.03085e-05	0.377315	216	0.101872	0.170409	-9.74291	TSN	Group1	Stress_Y17
LOC_Os01g06500	NA	PHLOEM 2-LIKE A5, putative, expressed	1	3058543	3059717	S1_3059294	A/G	1	3059294	6.39699e-05	0.365116	215	0.0572061	0.131584	-6.56077	FGN	Group1	Stress_Y17
LOC_Os01g06500	NA	PHLOEM 2-LIKE A5, putative, expressed	1	3058543	3059717	S1_3059294	A/G	1	3059294	8.40072e-05	0.375	216	0.101872	0.17002	-16.4639	TSN	Group1	Stress_Y17
LOC_Os01g06500	NA	PHLOEM 2-LIKE A5, putative, expressed	1	3058543	3059717	S1_3059339	T/G	1	3059339	4.99112e-05	0.365116	215	0.0572061	0.133859	10.4178	FGN	Group1	Stress_Y17
LOC_Os01g06500	NA	PHLOEM 2-LIKE A5, putative, expressed	1	3058543	3059717	S1_3059539	T/G	1	3059539	5.45373e-05	0.360465	215	0.0572061	0.133046	5.21334	FGN	Group1	Stress_Y17
LOC_Os01g06500	NA	PHLOEM 2-LIKE A5, putative, expressed	1	3058543	3059717	S1_3059539	T/G	1	3059539	8.51174e-05	0.372685	216	0.101872	0.169907	13.7114	TSN	Group1	Stress_Y17
LOC_Os01g06510	NA	arginyl-tRNA synthetase, putative, expressed	1	3060994	3066189	S1_3061533	T/G	1	3061533	5.45785e-05	0.332558	215	0.0572061	0.133039	6.40854	FGN	Group1	Stress_Y17
LOC_Os01g06540	NA	PHD finger protein, putative, expressed	1	3083395	3084568	S1_3084261	T/A	1	3084261	9.57148e-05	0.362791	215	0.0572061	0.127908	NA	FGN	Group1	Stress_Y17
LOC_Os01g06550	NA	NF-X1-type zinc finger protein, putative, expressed	1	3085406	3090887	S1_3085417	T/C	1	3085417	3.1228e-05	0.339535	215	0.0572061	0.138181	-4.61909	FGN	Group1	Stress_Y17
LOC_Os01g06550	NA	NF-X1-type zinc finger protein, putative, expressed	1	3085406	3090887	S1_3085506	A/G	1	3085506	5.42328e-05	0.351163	215	0.0572061	0.133097	NA	FGN	Group1	Stress_Y17
LOC_Os01g06550	NA	NF-X1-type zinc finger protein, putative, expressed	1	3085406	3090887	S1_3086045	C/T	1	3086045	9.80708e-05	0.360465	215	0.0572061	0.127687	NA	FGN	Group1	Stress_Y17
LOC_Os01g06550	NA	NF-X1-type zinc finger protein, putative, expressed	1	3085406	3090887	S1_3087884	G/A	1	3087884	4.25531e-05	0.360465	215	0.0572061	0.135326	NA	FGN	Group1	Stress_Y17
LOC_Os01g06550	NA	NF-X1-type zinc finger protein, putative, expressed	1	3085406	3090887	S1_3088504	T/G	1	3088504	8.50183e-05	0.355814	215	0.0572061	0.128987	NA	FGN	Group1	Stress_Y17
LOC_Os01g06550	NA	NF-X1-type zinc finger protein, putative, expressed	1	3085406	3090887	S1_3090250	G/A	1	3090250	8.66158e-05	0.360465	215	0.0572061	0.128817	NA	FGN	Group1	Stress_Y17
LOC_Os01g06550	NA	NF-X1-type zinc finger protein, putative, expressed	1	3085406	3090887	S1_3090388	T/C	1	3090388	8.19531e-05	0.376744	215	0.0572061	0.129321	NA	FGN	Group1	Stress_Y17
LOC_Os01g06550	NA	NF-X1-type zinc finger protein, putative, expressed	1	3085406	3090887	S1_3090610	G/A	1	3090610	4.75318e-05	0.365116	215	0.0572061	0.134308	-7.81247	FGN	Group1	Stress_Y17
LOC_Os01g06560	NA	transcription factor HBP-1b, putative, expressed	1	3091123	3092865	S1_3091319	A/G	1	3091319	3.02587e-05	0.365741	216	0.101872	0.178907	NA	TSN	Group1	Stress_Y17
LOC_Os01g06560	NA	transcription factor HBP-1b, putative, expressed	1	3091123	3092865	S1_3091319	A/G	1	3091319	1.57729e-05	0.353488	215	0.0572061	0.144526	NA	FGN	Group1	Stress_Y17
LOC_Os01g06560	NA	transcription factor HBP-1b, putative, expressed	1	3091123	3092865	S1_3091340	A/T	1	3091340	4.42626e-05	0.360465	215	0.0572061	0.134963	NA	FGN	Group1	Stress_Y17
LOC_Os01g06560	NA	transcription factor HBP-1b, putative, expressed	1	3091123	3092865	S1_3091666	A/T	1	3091666	3.03596e-05	0.367442	215	0.0572061	0.138441	1.1938	FGN	Group1	Stress_Y17
LOC_Os01g06560	NA	transcription factor HBP-1b, putative, expressed	1	3091123	3092865	S1_3091990	T/G	1	3091990	6.21925e-05	0.367442	215	0.0572061	0.131842	0.561766	FGN	Group1	Stress_Y17
LOC_Os01g06560	NA	transcription factor HBP-1b, putative, expressed	1	3091123	3092865	S1_3092097	C/G	1	3092097	2.89075e-05	0.362791	215	0.0572061	0.138895	4.53472	FGN	Group1	Stress_Y17
LOC_Os01g06560	NA	transcription factor HBP-1b, putative, expressed	1	3091123	3092865	S1_3092446	T/C	1	3092446	4.90268e-05	0.353488	215	0.0572061	0.134023	-0.0549545	FGN	Group1	Stress_Y17
LOC_Os01g06570	NA	expressed protein	1	3095210	3095930	S1_3095470	G/A	1	3095470	6.83193e-06	0.344186	215	0.0572061	0.152379	NA	FGN	Group1	Stress_Y17
LOC_Os01g06570	NA	expressed protein	1	3095210	3095930	S1_3095473	T/C	1	3095473	5.39293e-05	0.339535	215	0.0572061	0.133148	NA	FGN	Group1	Stress_Y17
LOC_Os01g06570	NA	expressed protein	1	3095210	3095930	S1_3095484	A/G	1	3095484	8.70166e-05	0.339535	215	0.0572061	0.128775	NA	FGN	Group1	Stress_Y17
LOC_Os01g06570	NA	expressed protein	1	3095210	3095930	S1_3095644	T/C	1	3095644	7.46092e-05	0.35814	215	0.0572061	0.130178	NA	FGN	Group1	Stress_Y17
LOC_Os01g06590	NA	zinc finger, C3HC4 type domain containing protein, expressed	1	3099428	3105235	S1_3103802	T/C	1	3103802	8.78059e-05	0.35814	215	0.0572061	0.128693	-0.580366	FGN	Group1	Stress_Y17
LOC_Os01g06590	NA	zinc finger, C3HC4 type domain containing protein, expressed	1	3099428	3105235	S1_3104550	C/T	1	3104550	8.1525e-05	0.351163	215	0.0572061	0.129369	-2.41021	FGN	Group1	Stress_Y17
LOC_Os01g06600	NA	glutaryl-CoA dehydrogenase, mitochondrial precursor, putative, expressed	1	3108117	3113963	S1_3109290	T/A	1	3109290	4.42096e-05	0.369767	215	0.0572061	0.134974	-0.604046	FGN	Group1	Stress_Y17
LOC_Os01g06600	NA	glutaryl-CoA dehydrogenase, mitochondrial precursor, putative, expressed	1	3108117	3113963	S1_3109929	G/A	1	3109929	5.28704e-05	0.374419	215	0.0572061	0.13333	5.46402	FGN	Group1	Stress_Y17
LOC_Os01g06620	NA	expressed protein	1	3122888	3124069	S1_3123123	C/T	1	3123123	1.09813e-05	0.386047	215	0.0572061	0.147914	2.77846	FGN	Group1	Stress_Y17
LOC_Os01g10310	NA	expressed protein	1	5424059	5424571	S1_5424355	A/G	1	5424355	1.16758e-05	0.479487	390	0.164556	0.207257	0.443318	TSN	Group2	Stress_Y17
LOC_Os01g11150	NA	gibberellin 2-beta-dioxygenase, putative, expressed	1	5968819	5972489	S1_5970981	A/C	1	5970981	9.88543e-05	0.395078	386	0.0824141	0.119609	-1.26967	FGN	Group2	Stress_Y17
LOC_Os01g13070	NA	expressed protein	1	7276019	7277972	S1_7276532	T/G	1	7276532	2.9012e-05	0.0673077	208	0.104889	0.185198	1.0307	GY	Group1	Stress_Y17
LOC_Os01g13540	OsNIN-like3	NIN, putative, expressed	1	7571236	7576817	S1_7573554	C/T	1	7573554	6.05184e-05	0.134615	208	0.104889	0.178532	-1.16232	GY	Group1	Stress_Y17
LOC_Os01g15039	NA	pectinesterase, putative, expressed	1	8447460	8451535	S1_8450658	T/C	1	8450658	5.88413e-05	0.395397	239	0.0710264	0.137225	0.862246	PN	Group1	Stress_Y17
LOC_Os01g22780	NA	GDSL-like lipase/acylhydrolase, putative, expressed	1	12804579	12810224	S1_12805560	G/A	1	12805560	6.98293e-05	0.376697	442	0.0177114	0.0538719	0.0362608	SN	Group2	Stress_Y17
LOC_Os01g22780	NA	GDSL-like lipase/acylhydrolase, putative, expressed	1	12804579	12810224	S1_12806026	C/T	1	12806026	6.91856e-05	0.383484	442	0.0177114	0.0539127	-0.233591	SN	Group2	Stress_Y17
LOC_Os01g22780	NA	GDSL-like lipase/acylhydrolase, putative, expressed	1	12804579	12810224	S1_12807551	A/G	1	12807551	3.84052e-05	0.395928	442	0.0177114	0.0565134	0.0246556	SN	Group2	Stress_Y17
LOC_Os01g22780	NA	GDSL-like lipase/acylhydrolase, putative, expressed	1	12804579	12810224	S1_12807938	A/T	1	12807938	5.2225e-05	0.391403	442	0.0177114	0.0551534	0.358955	SN	Group2	Stress_Y17
LOC_Os01g22780	NA	GDSL-like lipase/acylhydrolase, putative, expressed	1	12804579	12810224	S1_12808276	G/C	1	12808276	7.75658e-05	0.41629	442	0.0177114	0.0534093	-0.0347791	SN	Group2	Stress_Y17
LOC_Os01g22794	NA	transposon protein, putative, CACTA, En/Spm sub-class, expressed	1	12814561	12817628	S1_12815164	C/T	1	12815164	7.06979e-05	0.322398	442	0.0177114	0.0538174	-0.0458174	SN	Group2	Stress_Y17
LOC_Os01g22794	NA	transposon protein, putative, CACTA, En/Spm sub-class, expressed	1	12814561	12817628	S1_12815275	C/T	1	12815275	3.234e-05	0.39819	442	0.0177114	0.0572756	-0.049271	SN	Group2	Stress_Y17
LOC_Os01g22794	NA	transposon protein, putative, CACTA, En/Spm sub-class, expressed	1	12814561	12817628	S1_12815577	T/C	1	12815577	8.57068e-05	0.393665	442	0.0177114	0.0529703	0.143035	SN	Group2	Stress_Y17
LOC_Os01g22794	NA	transposon protein, putative, CACTA, En/Spm sub-class, expressed	1	12814561	12817628	S1_12815975	T/C	1	12815975	6.85854e-05	0.393665	442	0.0177114	0.0539511	0.0729013	SN	Group2	Stress_Y17
LOC_Os01g22794	NA	transposon protein, putative, CACTA, En/Spm sub-class, expressed	1	12814561	12817628	S1_12816483	T/C	1	12816483	2.91758e-05	0.247738	442	0.0177114	0.0577328	0.0666921	SN	Group2	Stress_Y17
LOC_Os01g22830	NA	retrotransposon protein, putative, Ty3-gypsy subclass, expressed	1	12827289	12830974	S1_12829643	C/T	1	12829643	9.42745e-05	0.302036	442	0.0177114	0.0525517	0.00588537	SN	Group2	Stress_Y17
LOC_Os01g22850	NA	retrotransposon protein, putative, Ty3-gypsy subclass	1	12838715	12840323	S1_12839544	A/G	1	12839544	5.75598e-05	0.120192	208	0.104889	0.178984	-0.475877	GY	Group1	Stress_Y17
LOC_Os01g22850	NA	retrotransposon protein, putative, Ty3-gypsy subclass	1	12838715	12840323	S1_12840139	T/C	1	12840139	3.04708e-05	0.0600962	208	0.104889	0.184751	0.00613199	GY	Group1	Stress_Y17
LOC_Os01g22910	NA	retrotransposon protein, putative, unclassified, expressed	1	12875498	12882540	S1_12879503	G/T	1	12879503	4.22157e-05	0.399321	442	0.0177114	0.0560944	0.0579994	SN	Group2	Stress_Y17
LOC_Os01g22910	NA	retrotransposon protein, putative, unclassified, expressed	1	12875498	12882540	S1_12881673	G/A	1	12881673	2.88122e-06	0.0625	208	0.104889	0.206589	-0.223428	GY	Group1	Stress_Y17
LOC_Os01g22954	NA	serine carboxypeptidase, putative, expressed	1	12896174	12915380	S1_12897803	C/T	1	12897803	7.28943e-05	0.390271	442	0.0177114	0.0536827	-0.0742129	SN	Group2	Stress_Y17
LOC_Os01g22954	NA	serine carboxypeptidase, putative, expressed	1	12896174	12915380	S1_12899593	G/A	1	12899593	7.83193e-05	0.390271	442	0.0177114	0.0533667	-0.0739598	SN	Group2	Stress_Y17
LOC_Os01g22954	NA	serine carboxypeptidase, putative, expressed	1	12896174	12915380	S1_12909207	A/T	1	12909207	7.94678e-05	0.397059	442	0.0177114	0.0533027	0.0194386	SN	Group2	Stress_Y17
LOC_Os01g22954	NA	serine carboxypeptidase, putative, expressed	1	12896174	12915380	S1_12912873	A/G	1	12912873	9.77654e-05	0.391403	442	0.0177114	0.0523921	0.04637	SN	Group2	Stress_Y17
LOC_Os01g22954	NA	serine carboxypeptidase, putative, expressed	1	12896174	12915380	S1_12913236	A/G	1	12913236	8.50718e-05	0.403846	442	0.0177114	0.053003	-0.11468	SN	Group2	Stress_Y17
LOC_Os01g23070	NA	expressed protein	1	12980585	12982781	S1_12981474	A/C	1	12981474	5.0774e-05	0.375566	442	0.0177114	0.0552779	0.0036333	SN	Group2	Stress_Y17
LOC_Os01g23070	NA	expressed protein	1	12980585	12982781	S1_12981561	A/T	1	12981561	4.92701e-05	0.39819	442	0.0177114	0.0554108	-0.0123849	SN	Group2	Stress_Y17
LOC_Os01g23320	NA	retrotransposon, putative, centromere-specific, expressed	1	13094452	13097951	S1_13096280	A/C	1	13096280	6.06676e-05	0.429864	442	0.0177114	0.0544919	-0.0645286	SN	Group2	Stress_Y17
LOC_Os01g23320	NA	retrotransposon, putative, centromere-specific, expressed	1	13094452	13097951	S1_13096539	C/T	1	13096539	2.50199e-05	0.411765	442	0.0177114	0.058416	0.0217737	SN	Group2	Stress_Y17
LOC_Os01g23390	NA	hypothetical protein	1	13145219	13145659	S1_13145279	C/T	1	13145279	6.68883e-05	0.390271	442	0.0177114	0.0540615	-0.0263511	SN	Group2	Stress_Y17
LOC_Os01g23530	NA	terpene synthase, putative, expressed	1	13211987	13218563	S1_13217611	T/G	1	13217611	5.31661e-05	0.397059	442	0.0177114	0.0550745	-0.0910564	SN	Group2	Stress_Y17
LOC_Os01g23560	NA	retrotransposon protein, putative, unclassified, expressed	1	13228071	13229853	S1_13229349	C/G	1	13229349	9.58628e-05	0.244344	442	0.0177114	0.0524784	-0.268982	SN	Group2	Stress_Y17
LOC_Os01g23590	NA	suppressor of Mek, putative, expressed	1	13246387	13262228	S1_13257845	A/C	1	13257845	9.38463e-05	0.286199	442	0.0177114	0.0525717	0.0931482	SN	Group2	Stress_Y17
LOC_Os01g23620	OsSar1a	miro, putative, expressed	1	13286103	13288466	S1_13287924	G/A	1	13287924	3.69496e-05	0.0528846	208	0.104889	0.182998	-4.90716	GY	Group1	Stress_Y17
LOC_Os01g23640	NA	mov34/MPN/PAD-1 family protein, expressed	1	13296332	13305295	S1_13300007	T/C	1	13300007	3.55191e-05	0.294118	442	0.0177114	0.0568597	-0.130627	SN	Group2	Stress_Y17
LOC_Os01g23640	NA	mov34/MPN/PAD-1 family protein, expressed	1	13296332	13305295	S1_13303274	A/T	1	13303274	7.75833e-05	0.289593	442	0.0177114	0.0534083	0.152979	SN	Group2	Stress_Y17
LOC_Os01g23640	NA	mov34/MPN/PAD-1 family protein, expressed	1	13296332	13305295	S1_13303346	A/G	1	13303346	7.27927e-05	0.289593	442	0.0177114	0.0536888	-0.137181	SN	Group2	Stress_Y17
LOC_Os01g23650	NA	expressed protein	1	13309978	13310316	S1_13310006	A/G	1	13310006	8.76645e-05	0.289593	442	0.0177114	0.0528711	-0.166635	SN	Group2	Stress_Y17
LOC_Os01g23650	NA	expressed protein	1	13309978	13310316	S1_13310148	T/C	1	13310148	8.76431e-05	0.283937	442	0.0177114	0.0528721	0.314038	SN	Group2	Stress_Y17
LOC_Os01g23670	NA	retrotransposon protein, putative, unclassified	1	13314434	13315391	S1_13314482	A/T	1	13314482	7.76791e-05	0.289593	442	0.0177114	0.0534029	0.102817	SN	Group2	Stress_Y17
LOC_Os01g23680	NA	rossmann fold nucleotide-binding protein involved in DNA uptake, putative, expressed	1	13319295	13323947	S1_13321680	T/C	1	13321680	4.1385e-05	0.286199	442	0.0177114	0.0561824	-0.0585488	SN	Group2	Stress_Y17
LOC_Os01g23690	NA	expressed protein	1	13327424	13328163	S1_13327903	A/G	1	13327903	7.52356e-05	0.302036	442	0.0177114	0.0535435	-0.13105	SN	Group2	Stress_Y17
LOC_Os01g23710	NA	no apical meristem protein, putative, expressed	1	13342879	13345906	S1_13344635	A/G	1	13344635	9.71453e-05	0.286199	442	0.0177114	0.05242	-0.113323	SN	Group2	Stress_Y17
LOC_Os01g23730	NA	retrotransposon protein, putative, unclassified, expressed	1	13348568	13349371	S1_13349181	G/C	1	13349181	5.97831e-06	0.226244	442	0.0177114	0.064825	0.118507	SN	Group2	Stress_Y17
LOC_Os01g23730	NA	retrotransposon protein, putative, unclassified, expressed	1	13348568	13349371	S1_13349224	C/T	1	13349224	2.85376e-05	0.282805	442	0.0177114	0.0578311	-0.127181	SN	Group2	Stress_Y17
LOC_Os01g23740	NA	OsPDIL2-2 protein disulfide isomerase PDIL2-2, expressed	1	13353629	13357510	S1_13355126	G/C	1	13355126	9.66874e-05	0.286199	442	0.0177114	0.0524408	-0.0061588	SN	Group2	Stress_Y17
LOC_Os01g23770	NA	OsMADS94 - MADS-box family gene with M-beta type-box, expressed	1	13366416	13367710	S1_13366547	C/G	1	13366547	7.05813e-05	0.289593	442	0.0177114	0.0538247	-0.183669	SN	Group2	Stress_Y17
LOC_Os01g23770	NA	OsMADS94 - MADS-box family gene with M-beta type-box, expressed	1	13366416	13367710	S1_13367326	A/G	1	13367326	4.65808e-05	0.28733	442	0.0177114	0.055659	0.139285	SN	Group2	Stress_Y17
LOC_Os01g23770	NA	OsMADS94 - MADS-box family gene with M-beta type-box, expressed	1	13366416	13367710	S1_13367329	T/C	1	13367329	9.59294e-05	0.282805	442	0.0177114	0.0524753	-0.133845	SN	Group2	Stress_Y17
LOC_Os01g23800	NA	expressed protein	1	13389999	13392236	S1_13391639	T/G	1	13391639	1.65609e-05	0.433258	442	0.0177114	0.0602552	0.0160713	SN	Group2	Stress_Y17
LOC_Os01g23800	NA	expressed protein	1	13389999	13392236	S1_13391691	C/T	1	13391691	1.87518e-05	0.433258	442	0.0177114	0.0597007	0.0594706	SN	Group2	Stress_Y17
LOC_Os01g23830	NA	retrotransposon protein, putative, unclassified, expressed	1	13410760	13412091	S1_13411104	A/G	1	13411104	3.77978e-05	0.228507	442	0.0177114	0.056584	-0.118317	SN	Group2	Stress_Y17
LOC_Os01g23830	NA	retrotransposon protein, putative, unclassified, expressed	1	13410760	13412091	S1_13411230	T/G	1	13411230	8.25826e-05	0.426471	442	0.0177114	0.0531336	-0.0358939	SN	Group2	Stress_Y17
LOC_Os01g23830	NA	retrotransposon protein, putative, unclassified, expressed	1	13410760	13412091	S1_13411618	T/C	1	13411618	1.26608e-05	0.420814	442	0.0177114	0.0614558	0.0458807	SN	Group2	Stress_Y17
LOC_Os01g23830	NA	retrotransposon protein, putative, unclassified, expressed	1	13410760	13412091	S1_13411650	T/C	1	13411650	6.97127e-05	0.443439	442	0.0177114	0.0538792	0.0455788	SN	Group2	Stress_Y17
LOC_Os01g23850	NA	transposon protein, putative, CACTA, En/Spm sub-class, expressed	1	13422753	13424642	S1_13424481	T/G	1	13424481	6.16848e-05	0.434389	442	0.0177114	0.0544185	0.0649425	SN	Group2	Stress_Y17
LOC_Os01g23880	NA	expressed protein	1	13442496	13443696	S1_13442996	A/G	1	13442996	9.61692e-05	0.288462	442	0.0177114	0.0524644	-0.082832	SN	Group2	Stress_Y17
LOC_Os01g23940	NA	expressed protein	1	13467990	13469759	S1_13468618	A/G	1	13468618	9.0446e-05	0.315611	442	0.0177114	0.0527338	-0.131859	SN	Group2	Stress_Y17
LOC_Os01g23960	NA	retrotransposon protein, putative, Ty3-gypsy subclass, expressed	1	13475815	13482656	S1_13479568	A/C	1	13479568	7.6952e-05	0.253886	386	0.0824141	0.120795	0.0929441	FGN	Group2	Stress_Y17
LOC_Os01g24010	NA	pleiotropic drug resistance protein, putative, expressed	1	13517518	13528480	S1_13519861	T/C	1	13519861	9.84715e-05	0.288462	442	0.0177114	0.0523605	0.322729	SN	Group2	Stress_Y17
LOC_Os01g24030	NA	AMP-binding enzyme, putative, expressed	1	13539762	13541958	S1_13540520	T/C	1	13540520	9.15678e-06	0.487557	442	0.0177114	0.062908	0.0323003	SN	Group2	Stress_Y17
LOC_Os01g24050	NA	expressed protein	1	13550372	13556984	S1_13550671	T/C	1	13550671	1.7851e-05	0.476244	442	0.0177114	0.0599203	0.0337775	SN	Group2	Stress_Y17
LOC_Os01g24050	NA	expressed protein	1	13550372	13556984	S1_13551691	T/C	1	13551691	9.27867e-05	0.30543	442	0.0177114	0.0526216	0.0273109	SN	Group2	Stress_Y17
LOC_Os01g24070	NA	GATA zinc finger domain containing protein, expressed	1	13570607	13573322	S1_13570649	G/A	1	13570649	7.55817e-05	0.309955	442	0.0177114	0.0535233	-0.0811716	SN	Group2	Stress_Y17
LOC_Os01g24430	NA	expressed protein	1	13775186	13776654	S1_13776394	G/T	1	13776394	8.28598e-05	0.447964	442	0.0177114	0.0531189	0.202456	SN	Group2	Stress_Y17
LOC_Os01g24700	NA	expressed protein	1	13899523	13900729	S1_13899886	A/G	1	13899886	6.40248e-05	0.319005	442	0.0177114	0.0542543	-0.43749	SN	Group2	Stress_Y17
LOC_Os01g24700	NA	expressed protein	1	13899523	13900729	S1_13900106	T/C	1	13900106	9.74086e-05	0.364253	442	0.0177114	0.0524081	-0.318622	SN	Group2	Stress_Y17
LOC_Os01g24700	NA	expressed protein	1	13899523	13900729	S1_13900109	T/C	1	13900109	4.2025e-05	0.373303	442	0.0177114	0.0561144	0.312211	SN	Group2	Stress_Y17
LOC_Os01g24710	OsSalT	jacalin-like lectin domain containing protein, expressed	1	13903153	13904729	S1_13904237	A/G	1	13904237	7.46341e-05	0.321267	442	0.0177114	0.0535788	-0.252434	SN	Group2	Stress_Y17
LOC_Os01g24710	OsSalT	jacalin-like lectin domain containing protein, expressed	1	13903153	13904729	S1_13904465	C/T	1	13904465	4.94996e-05	0.337104	442	0.0177114	0.0553902	0.373894	SN	Group2	Stress_Y17
LOC_Os01g24710	OsSalT	jacalin-like lectin domain containing protein, expressed	1	13903153	13904729	S1_13904466	A/T	1	13904466	4.95311e-05	0.334842	442	0.0177114	0.0553874	-0.367311	SN	Group2	Stress_Y17
LOC_Os01g26330	NA	retrotransposon protein, putative, unclassified	1	14935709	14936233	S1_14935821	T/A	1	14935821	1.38077e-05	0.0600962	208	0.104889	0.192003	3.53915	GY	Group1	Stress_Y17
LOC_Os01g34040	NA	retrotransposon protein, putative, unclassified, expressed	1	18735691	18741725	S1_18740123	A/C	1	18740123	8.47924e-05	0.163706	394	0.0249396	0.0643915	-0.983698	GY	Group2	Stress_Y17
LOC_Os01g34200	NA	AATF, putative, expressed	1	18853567	18857379	S1_18853912	G/C	1	18853912	4.47337e-05	0.0708763	388	0.0378276	0.0805477	-0.247164	SSR	Group2	Stress_Y17
LOC_Os01g39730	NA	retrotransposon protein, putative, unclassified, expressed	1	22404937	22407221	S1_22406018	A/G	1	22406018	4.45689e-05	0.0558376	394	0.0249396	0.0675689	-0.0342879	GY	Group2	Stress_Y17
LOC_Os01g40860	NA	aldehyde dehydrogenase, putative, expressed	1	23097256	23106303	S1_23099676	T/C	1	23099676	6.56061e-05	0.132124	386	0.0824141	0.121551	1.60724	FGN	Group2	Stress_Y17
LOC_Os01g52750	NA	OsSub3 - Putative Subtilisin homologue, expressed	1	30344079	30349015	S1_30347746	A/C	1	30347746	3.06932e-05	0.187198	414	0.0226813	0.0650417	0.354259	PN	Group2	Stress_Y17
LOC_Os01g53880	IAA6|OsIAA6	OsIAA6 - Auxin-responsive Aux/IAA gene family member, expressed	1	30975765	30979770	S1_30977498	C/T	1	30977498	7.36027e-05	0.15942	414	0.0226813	0.0609199	0.261552	PN	Group2	Stress_Y17
LOC_Os01g54320	NA	hypothetical protein	1	31263003	31263206	S1_31263140	A/G	1	31263140	5.08925e-05	0.157005	414	0.0226813	0.0626542	-0.0733192	PN	Group2	Stress_Y17
LOC_Os01g54670	NA	coiled-coil domain-containing protein 25, putative, expressed	1	31453332	31457551	S1_31454834	A/T	1	31454834	2.52802e-05	0.141304	414	0.0226813	0.0659608	0.635044	PN	Group2	Stress_Y17
LOC_Os01g55050	NA	protein of unknown function DUF1421 domain containing protein, expressed	1	31651616	31656531	S1_31654389	A/C	1	31654389	7.29325e-05	0.153382	414	0.0226813	0.0609628	-0.529671	PN	Group2	Stress_Y17
LOC_Os01g59300	NA	expressed protein	1	34277161	34280811	S1_34277616	C/T	1	34277616	9.61006e-05	0.126923	260	0.00614855	0.0671238	-0.161881	TGW	Group2	Stress_Y17
LOC_Os01g59660	OsMYBGA|OsGAMYB	MYB family transcription factor, putative, expressed	1	34508364	34512781	S1_34508726	T/C	1	34508726	9.07854e-05	0.0705128	390	0.164556	0.198426	2.40394	TSN	Group2	Stress_Y17
LOC_Os01g59660	OsMYBGA|OsGAMYB	MYB family transcription factor, putative, expressed	1	34508364	34512781	S1_34508786	G/T	1	34508786	7.73629e-05	0.141026	390	0.164556	0.199108	2.40535	TSN	Group2	Stress_Y17
LOC_Os01g60270	NA	homeobox domain containing protein, expressed	1	34862487	34866145	S1_34862718	T/C	1	34862718	1.81251e-06	0.123077	390	0.164556	0.215425	4.07305	TSN	Group2	Stress_Y17
LOC_Os01g60290	NA	expressed protein	1	34885348	34888692	S1_34885907	A/G	1	34885907	4.00794e-05	0.189744	390	0.164556	0.201925	-3.86248	TSN	Group2	Stress_Y17
LOC_Os01g60290	NA	expressed protein	1	34885348	34888692	S1_34887378	T/C	1	34887378	1.5259e-05	0.138462	390	0.164556	0.206095	-3.62174	TSN	Group2	Stress_Y17
LOC_Os01g60290	NA	expressed protein	1	34885348	34888692	S1_34887754	G/A	1	34887754	3.27303e-05	0.130769	390	0.164556	0.202796	5.66563	TSN	Group2	Stress_Y17
LOC_Os01g60290	NA	expressed protein	1	34885348	34888692	S1_34887981	A/C	1	34887981	9.91301e-05	0.0807692	390	0.164556	0.198051	-3.10563	TSN	Group2	Stress_Y17
LOC_Os01g60309	NA	retrotransposon protein, putative, Ty1-copia subclass, expressed	1	34888313	34892807	S1_34889086	G/C	1	34889086	5.15171e-05	0.117949	390	0.164556	0.200847	-8.56462	TSN	Group2	Stress_Y17
LOC_Os01g60309	NA	retrotransposon protein, putative, Ty1-copia subclass, expressed	1	34888313	34892807	S1_34889555	G/C	1	34889555	5.73061e-05	0.189744	390	0.164556	0.200391	3.41453	TSN	Group2	Stress_Y17
LOC_Os01g60309	NA	retrotransposon protein, putative, Ty1-copia subclass, expressed	1	34888313	34892807	S1_34890240	C/T	1	34890240	9.88437e-05	0.188462	390	0.164556	0.198063	7.33618	TSN	Group2	Stress_Y17
LOC_Os01g65790	NA	pectinesterase, putative, expressed	1	38206872	38211799	S1_38209450	G/A	1	38209450	8.58517e-05	0.0974359	390	0.164556	0.198664	-3.97262	TSN	Group2	Stress_Y17
LOC_Os01g66850	NA	pectinacetylesterase domain containing protein, expressed	1	38812350	38815179	S1_38812769	A/G	1	38812769	8.91566e-05	0.148148	216	0.101872	0.169506	-10.8065	TSN	Group1	Stress_Y17
LOC_Os01g66990	NA	expressed protein	1	38904009	38909598	S1_38904558	A/G	1	38904558	5.74392e-05	0.159722	216	0.101872	0.173313	3.44762	TSN	Group1	Stress_Y17
LOC_Os01g66990	NA	expressed protein	1	38904009	38909598	S1_38905441	G/A	1	38905441	3.23333e-05	0.171296	216	0.101872	0.178326	-16.3594	TSN	Group1	Stress_Y17
LOC_Os01g72880	OsMLH1	DNA mismatch repair protein Mlh1, putative, expressed	1	42268880	42274913	S1_42272172	C/G	1	42272172	7.5733e-05	0.4819	442	0.0177114	0.0535145	0.250498	SN	Group2	Stress_Y17
LOC_Os01g72880	OsMLH1	DNA mismatch repair protein Mlh1, putative, expressed	1	42268880	42274913	S1_42273530	T/C	1	42273530	9.97467e-05	0.449095	442	0.0177114	0.052304	0.0687426	SN	Group2	Stress_Y17
LOC_Os01g72890	NA	transposon protein, putative, CACTA, En/Spm sub-class, expressed	1	42275543	42280567	S1_42276181	A/G	1	42276181	2.43128e-05	0.479638	442	0.0177114	0.0585436	-0.0747725	SN	Group2	Stress_Y17
LOC_Os01g72890	NA	transposon protein, putative, CACTA, En/Spm sub-class, expressed	1	42275543	42280567	S1_42278914	A/G	1	42278914	8.93704e-05	0.475113	442	0.0177114	0.0527864	-0.0599419	SN	Group2	Stress_Y17
LOC_Os02g01030	HSP40	tetratricopeptide repeat domain containing protein, expressed	2	14061	18598	S2_17321	G/A	2	17321	3.03153e-05	0.272031	261	0.291989	0.341685	-0.894248	HD	Group1	Stress_Y17
LOC_Os02g01110	NA	translation initiation factor IF-3, putative, expressed	2	59280	64726	S2_60863	G/T	2	60863	3.05371e-05	0.273946	261	0.291989	0.341644	0.334397	HD	Group1	Stress_Y17
LOC_Os02g01900	NA	expressed protein	2	491452	492759	S2_492171	G/C	2	492171	3.82984e-05	0.194588	388	0.0378276	0.0813204	0.444789	SSR	Group2	Stress_Y17
LOC_Os02g03360	NA	expressed protein	2	1360424	1363699	S2_1363330	A/G	2	1363330	3.4706e-05	0.162821	390	0.164556	0.202544	-1.95401	TSN	Group2	Stress_Y17
LOC_Os02g03600	NA	dnaJ domain containing protein, expressed	2	1468977	1474710	S2_1474664	A/T	2	1474664	1.84754e-05	0.134615	390	0.164556	0.205266	0.949219	TSN	Group2	Stress_Y17
LOC_Os02g05744	NA	endoglucanase, putative, expressed	2	2824360	2830402	S2_2830303	A/G	2	2830303	6.05749e-05	0.388889	261	0.291989	0.337814	-3.07308	HD	Group1	Stress_Y17
LOC_Os02g11020	CYP734A2	cytochrome P450 72A1, putative, expressed	2	5862711	5865569	S2_5863817	A/T	2	5863817	7.62116e-05	0.195596	386	0.0824141	0.12084	0.0877386	FGN	Group2	Stress_Y17
LOC_Os02g12650	NA	puromycin-sensitive aminopeptidase, putative, expressed	2	6599222	6606542	S2_6600130	T/C	2	6600130	5.83381e-05	0.0532995	394	0.0249396	0.0662362	1.85811	GY	Group2	Stress_Y17
LOC_Os02g19830	NA	retrotransposon protein, putative, Ty3-gypsy subclass, expressed	2	11616655	11621240	S2_11619930	A/G	2	11619930	4.90985e-05	0.189614	414	0.23349	0.264974	0.344641	HD	Group2	Stress_Y17
LOC_Os02g21400	NA	retrotransposon protein, putative, unclassified, expressed	2	12702403	12709678	S2_12705488	A/G	2	12705488	2.88181e-05	0.161836	414	0.23349	0.266948	-0.495417	HD	Group2	Stress_Y17
LOC_Os02g21730	NA	transposon protein, putative, CACTA, En/Spm sub-class, expressed	2	12914268	12917870	S2_12915577	C/G	2	12915577	8.04404e-05	0.0954106	414	0.0226813	0.0605033	-0.25047	PN	Group2	Stress_Y17
LOC_Os02g24430	NA	expressed protein	2	14161319	14171782	S2_14162336	C/G	2	14162336	8.87619e-05	0.0603774	265	0.000718228	0.0614254	0.0421731	SN	Group1	Stress_Y17
LOC_Os02g25170	NA	retrotransposon protein, putative, unclassified, expressed	2	14633772	14641650	S2_14637565	G/T	2	14637565	9.90835e-05	0.076087	414	0.0226813	0.0595274	-1.63317	PN	Group2	Stress_Y17
LOC_Os02g26270	NA	retrotransposon protein, putative, unclassified, expressed	2	15425492	15428958	S2_15425835	C/T	2	15425835	5.11021e-05	0.147343	414	0.0226813	0.0626348	1.62553	PN	Group2	Stress_Y17
LOC_Os02g30910	OsSWEET15	nodulin MtN3 family protein, putative, expressed	2	18454404	18457136	S2_18455951	G/A	2	18455951	6.21383e-05	0.403774	265	0.000718228	0.0641741	-0.0114103	SN	Group1	Stress_Y17
LOC_Os02g30920	NA	hypothetical protein	2	18469125	18470677	S2_18469733	C/T	2	18469733	4.78235e-05	0.40566	265	0.000718228	0.0662005	-0.0594603	SN	Group1	Stress_Y17
LOC_Os02g30920	NA	hypothetical protein	2	18469125	18470677	S2_18470247	T/C	2	18470247	8.22212e-05	0.415094	265	0.000718228	0.0620143	-0.446419	SN	Group1	Stress_Y17
LOC_Os02g30930	NA	expressed protein	2	18474494	18476089	S2_18475503	C/T	2	18475503	3.0513e-05	0.420755	265	0.000718228	0.069694	-0.113364	SN	Group1	Stress_Y17
LOC_Os02g30930	NA	expressed protein	2	18474494	18476089	S2_18475720	T/C	2	18475720	8.00532e-05	0.415094	265	0.000718228	0.0622201	-0.0233718	SN	Group1	Stress_Y17
LOC_Os02g30930	NA	expressed protein	2	18474494	18476089	S2_18475912	A/G	2	18475912	7.28485e-05	0.418868	265	0.000718228	0.0629467	-0.0379097	SN	Group1	Stress_Y17
LOC_Os02g30930	NA	expressed protein	2	18474494	18476089	S2_18476026	A/G	2	18476026	8.61256e-05	0.420755	265	0.000718228	0.0616573	-0.0674938	SN	Group1	Stress_Y17
LOC_Os02g30940	NA	expressed protein	2	18479186	18481348	S2_18479835	A/C	2	18479835	4.63933e-05	0.415094	265	0.000718228	0.066436	0.0286609	SN	Group1	Stress_Y17
LOC_Os02g30940	NA	expressed protein	2	18479186	18481348	S2_18481164	A/C	2	18481164	3.5726e-05	0.411321	265	0.000718228	0.0684656	-0.10233	SN	Group1	Stress_Y17
LOC_Os02g30974	NA	expressed protein	2	18501203	18509632	S2_18502171	G/A	2	18502171	1.73753e-05	0.413208	265	0.000718228	0.074099	0.240751	SN	Group1	Stress_Y17
LOC_Os02g30974	NA	expressed protein	2	18501203	18509632	S2_18502680	A/G	2	18502680	6.36722e-05	0.416981	265	0.000718228	0.0639857	0.0429525	SN	Group1	Stress_Y17
LOC_Os02g30974	NA	expressed protein	2	18501203	18509632	S2_18505413	A/G	2	18505413	3.62912e-05	0.411321	265	0.000718228	0.0683434	-0.124242	SN	Group1	Stress_Y17
LOC_Os02g30974	NA	expressed protein	2	18501203	18509632	S2_18506575	A/G	2	18506575	5.55992e-05	0.413208	265	0.000718228	0.0650338	0.0830069	SN	Group1	Stress_Y17
LOC_Os02g30974	NA	expressed protein	2	18501203	18509632	S2_18507312	C/T	2	18507312	3.71301e-05	0.415094	265	0.000718228	0.0681657	-0.0680469	SN	Group1	Stress_Y17
LOC_Os02g30990	NA	retrotransposon protein, putative, Ty3-gypsy subclass, expressed	2	18510791	18514563	S2_18510863	T/G	2	18510863	7.28203e-05	0.422642	265	0.000718228	0.0629497	-0.207918	SN	Group1	Stress_Y17
LOC_Os02g30990	NA	retrotransposon protein, putative, Ty3-gypsy subclass, expressed	2	18510791	18514563	S2_18511658	A/G	2	18511658	8.04688e-05	0.420755	265	0.000718228	0.0621802	-0.285277	SN	Group1	Stress_Y17
LOC_Os02g30990	NA	retrotransposon protein, putative, Ty3-gypsy subclass, expressed	2	18510791	18514563	S2_18512502	C/T	2	18512502	6.13069e-05	0.415094	265	0.000718228	0.0642782	0.0956335	SN	Group1	Stress_Y17
LOC_Os02g30990	NA	retrotransposon protein, putative, Ty3-gypsy subclass, expressed	2	18510791	18514563	S2_18512777	C/T	2	18512777	4.19408e-05	0.418868	265	0.000718228	0.0672189	-0.208146	SN	Group1	Stress_Y17
LOC_Os02g30990	NA	retrotransposon protein, putative, Ty3-gypsy subclass, expressed	2	18510791	18514563	S2_18513131	T/C	2	18513131	6.89881e-05	0.411321	265	0.000718228	0.0633667	0.447971	SN	Group1	Stress_Y17
LOC_Os02g30990	NA	retrotransposon protein, putative, Ty3-gypsy subclass, expressed	2	18510791	18514563	S2_18513192	A/T	2	18513192	6.41141e-05	0.415094	265	0.000718228	0.0639323	-0.10105	SN	Group1	Stress_Y17
LOC_Os02g30990	NA	retrotransposon protein, putative, Ty3-gypsy subclass, expressed	2	18510791	18514563	S2_18513421	A/G	2	18513421	7.19207e-05	0.415094	265	0.000718228	0.0630456	0.00296308	SN	Group1	Stress_Y17
LOC_Os02g31000	NA	retrotransposon protein, putative, unclassified, expressed	2	18515537	18518603	S2_18515979	T/C	2	18515979	4.77046e-05	0.415094	265	0.000718228	0.0662198	-0.00700185	SN	Group1	Stress_Y17
LOC_Os02g31000	NA	retrotransposon protein, putative, unclassified, expressed	2	18515537	18518603	S2_18516178	T/C	2	18516178	4.76328e-05	0.411321	265	0.000718228	0.0662315	0.0811947	SN	Group1	Stress_Y17
LOC_Os02g31000	NA	retrotransposon protein, putative, unclassified, expressed	2	18515537	18518603	S2_18516392	A/G	2	18516392	5.45228e-05	0.411321	265	0.000718228	0.0651851	0.0878715	SN	Group1	Stress_Y17
LOC_Os02g31000	NA	retrotransposon protein, putative, unclassified, expressed	2	18515537	18518603	S2_18516893	A/T	2	18516893	3.28471e-05	0.418868	265	0.000718228	0.0691196	0.134871	SN	Group1	Stress_Y17
LOC_Os02g31000	NA	retrotransposon protein, putative, unclassified, expressed	2	18515537	18518603	S2_18517665	A/G	2	18517665	6.87627e-05	0.416981	265	0.000718228	0.0633919	0.0743101	SN	Group1	Stress_Y17
LOC_Os02g31000	NA	retrotransposon protein, putative, unclassified, expressed	2	18515537	18518603	S2_18517925	G/A	2	18517925	7.17176e-05	0.411321	265	0.000718228	0.0630674	0.114961	SN	Group1	Stress_Y17
LOC_Os02g31010	NA	retrotransposon protein, putative, unclassified, expressed	2	18520242	18524015	S2_18521427	A/G	2	18521427	8.91068e-05	0.407547	265	0.000718228	0.0613956	-0.0594729	SN	Group1	Stress_Y17
LOC_Os02g31010	NA	retrotransposon protein, putative, unclassified, expressed	2	18520242	18524015	S2_18521690	T/C	2	18521690	6.69423e-05	0.413208	265	0.000718228	0.063599	-0.00498865	SN	Group1	Stress_Y17
LOC_Os02g31010	NA	retrotransposon protein, putative, unclassified, expressed	2	18520242	18524015	S2_18521711	A/T	2	18521711	6.74824e-05	0.413208	265	0.000718228	0.063537	-0.112046	SN	Group1	Stress_Y17
LOC_Os02g31010	NA	retrotransposon protein, putative, unclassified, expressed	2	18520242	18524015	S2_18521793	T/G	2	18521793	5.44134e-05	0.411321	265	0.000718228	0.0652006	-0.12093	SN	Group1	Stress_Y17
LOC_Os02g31010	NA	retrotransposon protein, putative, unclassified, expressed	2	18520242	18524015	S2_18522294	T/C	2	18522294	4.36758e-05	0.413208	265	0.000718228	0.0669043	0.0245689	SN	Group1	Stress_Y17
LOC_Os02g31010	NA	retrotransposon protein, putative, unclassified, expressed	2	18520242	18524015	S2_18523930	A/C	2	18523930	2.9751e-05	0.418868	265	0.000718228	0.0698912	-0.0120358	SN	Group1	Stress_Y17
LOC_Os02g31020	NA	expressed protein	2	18526922	18530034	S2_18527556	T/A	2	18527556	8.93414e-05	0.420755	265	0.000718228	0.0613754	-0.129565	SN	Group1	Stress_Y17
LOC_Os02g31020	NA	expressed protein	2	18526922	18530034	S2_18527825	C/T	2	18527825	2.87857e-05	0.416981	265	0.000718228	0.0701485	-0.153727	SN	Group1	Stress_Y17
LOC_Os02g31020	NA	expressed protein	2	18526922	18530034	S2_18528748	C/T	2	18528748	7.29069e-05	0.422642	265	0.000718228	0.0629406	-0.0722812	SN	Group1	Stress_Y17
LOC_Os02g31020	NA	expressed protein	2	18526922	18530034	S2_18529551	A/G	2	18529551	2.92442e-05	0.415094	265	0.000718228	0.0700252	-0.00147894	SN	Group1	Stress_Y17
LOC_Os02g31020	NA	expressed protein	2	18526922	18530034	S2_18529792	A/G	2	18529792	4.53203e-05	0.413208	265	0.000718228	0.0666175	-0.110271	SN	Group1	Stress_Y17
LOC_Os02g31020	NA	expressed protein	2	18526922	18530034	S2_18529943	G/C	2	18529943	6.54647e-05	0.420755	265	0.000718228	0.0637713	0.352569	SN	Group1	Stress_Y17
LOC_Os02g31020	NA	expressed protein	2	18526922	18530034	S2_18530000	A/G	2	18530000	6.82665e-05	0.416981	265	0.000718228	0.0634478	-0.0198393	SN	Group1	Stress_Y17
LOC_Os02g31030	NA	glycerophosphoryl diester phosphodiesterase family protein, putative, expressed	2	18537041	18540912	S2_18537250	C/A	2	18537250	5.75551e-05	0.403774	265	0.000718228	0.0647663	-0.0188401	SN	Group1	Stress_Y17
LOC_Os02g31030	NA	glycerophosphoryl diester phosphodiesterase family protein, putative, expressed	2	18537041	18540912	S2_18537829	G/A	2	18537829	8.0504e-05	0.403774	265	0.000718228	0.0621768	0.0706691	SN	Group1	Stress_Y17
LOC_Os02g31030	NA	glycerophosphoryl diester phosphodiesterase family protein, putative, expressed	2	18537041	18540912	S2_18540446	A/G	2	18540446	8.24725e-06	0.416981	265	0.000718228	0.0799734	-0.0809692	SN	Group1	Stress_Y17
LOC_Os02g31030	NA	glycerophosphoryl diester phosphodiesterase family protein, putative, expressed	2	18537041	18540912	S2_18540674	C/A	2	18540674	1.98883e-05	0.413208	265	0.000718228	0.0730396	0.553789	SN	Group1	Stress_Y17
LOC_Os02g31040	NA	dihydrolipoyllysine-residue succinyltransferase component of 2-oxoglutarate dehydrogenase complex, mitochondrial precursor, putative, expressed	2	18546692	18552235	S2_18548440	T/C	2	18548440	1.01998e-05	0.413208	265	0.000718228	0.0782932	-0.0977785	SN	Group1	Stress_Y17
LOC_Os02g31040	NA	dihydrolipoyllysine-residue succinyltransferase component of 2-oxoglutarate dehydrogenase complex, mitochondrial precursor, putative, expressed	2	18546692	18552235	S2_18548588	A/T	2	18548588	8.62255e-05	0.415094	265	0.000718228	0.0616484	-0.162265	SN	Group1	Stress_Y17
LOC_Os02g31040	NA	dihydrolipoyllysine-residue succinyltransferase component of 2-oxoglutarate dehydrogenase complex, mitochondrial precursor, putative, expressed	2	18546692	18552235	S2_18548756	A/G	2	18548756	6.29677e-05	0.413208	265	0.000718228	0.0640716	-0.0533142	SN	Group1	Stress_Y17
LOC_Os02g31040	NA	dihydrolipoyllysine-residue succinyltransferase component of 2-oxoglutarate dehydrogenase complex, mitochondrial precursor, putative, expressed	2	18546692	18552235	S2_18548952	T/C	2	18548952	4.19282e-05	0.420755	265	0.000718228	0.0672213	-0.131327	SN	Group1	Stress_Y17
LOC_Os02g31040	NA	dihydrolipoyllysine-residue succinyltransferase component of 2-oxoglutarate dehydrogenase complex, mitochondrial precursor, putative, expressed	2	18546692	18552235	S2_18549663	T/C	2	18549663	2.09642e-05	0.418868	265	0.000718228	0.0726269	0.0507363	SN	Group1	Stress_Y17
LOC_Os02g31040	NA	dihydrolipoyllysine-residue succinyltransferase component of 2-oxoglutarate dehydrogenase complex, mitochondrial precursor, putative, expressed	2	18546692	18552235	S2_18549674	G/A	2	18549674	3.03453e-05	0.422642	265	0.000718228	0.069737	0.0525554	SN	Group1	Stress_Y17
LOC_Os02g31040	NA	dihydrolipoyllysine-residue succinyltransferase component of 2-oxoglutarate dehydrogenase complex, mitochondrial precursor, putative, expressed	2	18546692	18552235	S2_18550965	G/A	2	18550965	1.45639e-05	0.416981	265	0.000718228	0.0754859	-0.170511	SN	Group1	Stress_Y17
LOC_Os02g31040	NA	dihydrolipoyllysine-residue succinyltransferase component of 2-oxoglutarate dehydrogenase complex, mitochondrial precursor, putative, expressed	2	18546692	18552235	S2_18551351	T/G	2	18551351	1.68941e-05	0.418868	265	0.000718228	0.0743195	-0.0934141	SN	Group1	Stress_Y17
LOC_Os02g31040	NA	dihydrolipoyllysine-residue succinyltransferase component of 2-oxoglutarate dehydrogenase complex, mitochondrial precursor, putative, expressed	2	18546692	18552235	S2_18551403	A/G	2	18551403	2.17146e-05	0.413208	265	0.000718228	0.0723515	-0.141738	SN	Group1	Stress_Y17
LOC_Os02g31040	NA	dihydrolipoyllysine-residue succinyltransferase component of 2-oxoglutarate dehydrogenase complex, mitochondrial precursor, putative, expressed	2	18546692	18552235	S2_18551539	G/C	2	18551539	4.71778e-05	0.411321	265	0.000718228	0.0663059	-0.18104	SN	Group1	Stress_Y17
LOC_Os02g31040	NA	dihydrolipoyllysine-residue succinyltransferase component of 2-oxoglutarate dehydrogenase complex, mitochondrial precursor, putative, expressed	2	18546692	18552235	S2_18551786	T/C	2	18551786	7.68221e-05	0.418868	265	0.000718228	0.0625374	0.129376	SN	Group1	Stress_Y17
LOC_Os02g31040	NA	dihydrolipoyllysine-residue succinyltransferase component of 2-oxoglutarate dehydrogenase complex, mitochondrial precursor, putative, expressed	2	18546692	18552235	S2_18551795	A/G	2	18551795	9.57919e-05	0.416981	265	0.000718228	0.0608396	-0.120581	SN	Group1	Stress_Y17
LOC_Os02g31050	NA	expressed protein	2	18553356	18554768	S2_18553650	T/C	2	18553650	2.39276e-05	0.411321	265	0.000718228	0.0715922	-0.032875	SN	Group1	Stress_Y17
LOC_Os02g31050	NA	expressed protein	2	18553356	18554768	S2_18553942	T/C	2	18553942	3.05213e-05	0.411321	265	0.000718228	0.0696919	0.0720521	SN	Group1	Stress_Y17
LOC_Os02g31050	NA	expressed protein	2	18553356	18554768	S2_18553946	A/G	2	18553946	3.05213e-05	0.411321	265	0.000718228	0.0696919	-0.103043	SN	Group1	Stress_Y17
LOC_Os02g31050	NA	expressed protein	2	18553356	18554768	S2_18554018	T/C	2	18554018	4.25039e-05	0.418868	265	0.000718228	0.0671154	-0.0896209	SN	Group1	Stress_Y17
LOC_Os02g31050	NA	expressed protein	2	18553356	18554768	S2_18554157	T/C	2	18554157	2.09744e-05	0.409434	265	0.000718228	0.072623	-0.175155	SN	Group1	Stress_Y17
LOC_Os02g31050	NA	expressed protein	2	18553356	18554768	S2_18554424	T/C	2	18554424	6.56644e-05	0.420755	265	0.000718228	0.0637478	0.195919	SN	Group1	Stress_Y17
LOC_Os02g31050	NA	expressed protein	2	18553356	18554768	S2_18554459	A/G	2	18554459	4.17816e-05	0.418868	265	0.000718228	0.0672485	0.0501151	SN	Group1	Stress_Y17
LOC_Os02g31050	NA	expressed protein	2	18553356	18554768	S2_18554509	G/A	2	18554509	4.79981e-05	0.416981	265	0.000718228	0.0661723	0.143496	SN	Group1	Stress_Y17
LOC_Os02g31050	NA	expressed protein	2	18553356	18554768	S2_18554683	G/A	2	18554683	2.65735e-05	0.416981	265	0.000718228	0.0707726	-0.0438897	SN	Group1	Stress_Y17
LOC_Os02g31060	NA	hypothetical protein	2	18556484	18556723	S2_18556567	T/C	2	18556567	1.50662e-05	0.411321	265	0.000718228	0.0752192	0.143496	SN	Group1	Stress_Y17
LOC_Os02g31070	NA	expressed protein	2	18564238	18568572	S2_18564891	A/G	2	18564891	7.3277e-05	0.424528	265	0.000718228	0.0629015	-0.134377	SN	Group1	Stress_Y17
LOC_Os02g31070	NA	expressed protein	2	18564238	18568572	S2_18564966	T/G	2	18564966	3.8081e-05	0.415094	265	0.000718228	0.0679691	-0.155216	SN	Group1	Stress_Y17
LOC_Os02g31070	NA	expressed protein	2	18564238	18568572	S2_18567171	A/G	2	18567171	7.41183e-05	0.437736	265	0.000718228	0.0628135	0.104987	SN	Group1	Stress_Y17
LOC_Os02g31070	NA	expressed protein	2	18564238	18568572	S2_18567522	G/A	2	18567522	4.77198e-05	0.422642	265	0.000718228	0.0662174	-0.105285	SN	Group1	Stress_Y17
LOC_Os02g31074	NA	expressed protein	2	18569765	18573161	S2_18572063	C/T	2	18572063	7.47468e-05	0.435849	265	0.000718228	0.0627484	0.123562	SN	Group1	Stress_Y17
LOC_Os02g31080	NA	hydroxyproline-rich glycoprotein family protein, putative, expressed	2	18575033	18581693	S2_18575231	A/G	2	18575231	5.02211e-05	0.418868	265	0.000718228	0.0658214	0.172234	SN	Group1	Stress_Y17
LOC_Os02g31080	NA	hydroxyproline-rich glycoprotein family protein, putative, expressed	2	18575033	18581693	S2_18576333	A/G	2	18576333	1.14145e-05	0.416981	265	0.000718228	0.0774051	0.133812	SN	Group1	Stress_Y17
LOC_Os02g31080	NA	hydroxyproline-rich glycoprotein family protein, putative, expressed	2	18575033	18581693	S2_18576535	C/G	2	18576535	4.57716e-05	0.415094	265	0.000718228	0.0665406	-0.0166609	SN	Group1	Stress_Y17
LOC_Os02g31080	NA	hydroxyproline-rich glycoprotein family protein, putative, expressed	2	18575033	18581693	S2_18577095	C/G	2	18577095	1.14961e-05	0.420755	265	0.000718228	0.0773489	0.0126616	SN	Group1	Stress_Y17
LOC_Os02g31080	NA	hydroxyproline-rich glycoprotein family protein, putative, expressed	2	18575033	18581693	S2_18579141	T/A	2	18579141	4.40915e-05	0.418868	265	0.000718228	0.0668307	-0.0133323	SN	Group1	Stress_Y17
LOC_Os02g31080	NA	hydroxyproline-rich glycoprotein family protein, putative, expressed	2	18575033	18581693	S2_18580120	G/A	2	18580120	2.7453e-05	0.415094	265	0.000718228	0.0705184	0.071987	SN	Group1	Stress_Y17
LOC_Os02g31080	NA	hydroxyproline-rich glycoprotein family protein, putative, expressed	2	18575033	18581693	S2_18580969	A/T	2	18580969	2.5236e-05	0.426415	265	0.000718228	0.071176	-0.0428623	SN	Group1	Stress_Y17
LOC_Os02g31080	NA	hydroxyproline-rich glycoprotein family protein, putative, expressed	2	18575033	18581693	S2_18581334	G/A	2	18581334	3.97296e-05	0.415094	265	0.000718228	0.0676397	-0.24967	SN	Group1	Stress_Y17
LOC_Os02g32504	NA	heparan-alpha-glucosaminide N-acetyltransferase, putative, expressed	2	19225374	19235632	S2_19233000	G/A	2	19233000	9.15255e-05	0.196226	265	0.000718228	0.0611897	0.261137	SN	Group1	Stress_Y17
LOC_Os02g32560	NA	retrotransposon protein, putative, LINE subclass, expressed	2	19277045	19279152	S2_19277866	G/A	2	19277866	8.8641e-05	0.273585	265	0.000718228	0.0614359	-0.0717331	SN	Group1	Stress_Y17
LOC_Os02g36490	NA	expressed protein	2	22038604	22042021	S2_22038738	A/C	2	22038738	7.68186e-05	0.207729	414	0.0226813	0.0607193	0.244952	PN	Group2	Stress_Y17
LOC_Os02g40410	NA	expressed protein	2	24471544	24477323	S2_24477251	A/G	2	24477251	6.65919e-05	0.283816	414	0.0226813	0.0613897	0.204351	PN	Group2	Stress_Y17
LOC_Os02g44430	NA	transposon protein, putative, unclassified, expressed	2	26902688	26904549	S2_26904075	A/G	2	26904075	4.81618e-05	0.0692308	390	0.164556	0.201136	1.14132	TSN	Group2	Stress_Y17
LOC_Os02g49700	NA	homeobox associated leucine zipper, putative, expressed	2	30381303	30383661	S2_30381323	A/C	2	30381323	5.14933e-07	0.0721154	208	0.104889	0.222958	1.38905	GY	Group1	Stress_Y17
LOC_Os02g49720	ALDH2a|OsALDH2B5	aldehyde dehydrogenase, putative, expressed	2	30392547	30396775	S2_30395641	A/C	2	30395641	3.99524e-09	0.0576923	208	0.104889	0.270986	2.39016	GY	Group1	Stress_Y17
LOC_Os02g49720	ALDH2a|OsALDH2B5	aldehyde dehydrogenase, putative, expressed	2	30392547	30396775	S2_30395862	T/C	2	30395862	1.59591e-06	0.0576923	208	0.104889	0.212166	-0.335853	GY	Group1	Stress_Y17
LOC_Os02g49730	NA	pre-mRNA processing ribonucleoprotein, binding region, putative, expressed	2	30398308	30403935	S2_30401571	T/C	2	30401571	3.30991e-08	0.0721154	208	0.104889	0.249758	-0.788066	GY	Group1	Stress_Y17
LOC_Os02g49730	NA	pre-mRNA processing ribonucleoprotein, binding region, putative, expressed	2	30398308	30403935	S2_30402689	A/C	2	30402689	5.00465e-08	0.0697115	208	0.104889	0.245666	-3.99386	GY	Group1	Stress_Y17
LOC_Os02g49730	NA	pre-mRNA processing ribonucleoprotein, binding region, putative, expressed	2	30398308	30403935	S2_30402812	A/G	2	30402812	7.71565e-06	0.0721154	208	0.104889	0.197385	-2.96711	GY	Group1	Stress_Y17
LOC_Os02g49730	NA	pre-mRNA processing ribonucleoprotein, binding region, putative, expressed	2	30398308	30403935	S2_30402863	A/G	2	30402863	6.89453e-05	0.387179	390	0.164556	0.1996	-2.70707	TSN	Group2	Stress_Y17
LOC_Os02g49730	NA	pre-mRNA processing ribonucleoprotein, binding region, putative, expressed	2	30398308	30403935	S2_30402909	G/A	2	30402909	9.74962e-08	0.0625	208	0.104889	0.239106	1.11469	GY	Group1	Stress_Y17
LOC_Os02g49730	NA	pre-mRNA processing ribonucleoprotein, binding region, putative, expressed	2	30398308	30403935	S2_30403026	G/C	2	30403026	3.15591e-06	0.0673077	208	0.104889	0.205733	0.0994768	GY	Group1	Stress_Y17
LOC_Os02g49730	NA	pre-mRNA processing ribonucleoprotein, binding region, putative, expressed	2	30398308	30403935	S2_30403652	C/T	2	30403652	1.33366e-09	0.0721154	208	0.104889	0.282199	3.13801	GY	Group1	Stress_Y17
LOC_Os02g49730	NA	pre-mRNA processing ribonucleoprotein, binding region, putative, expressed	2	30398308	30403935	S2_30403821	T/G	2	30403821	2.88191e-06	0.0913462	208	0.104889	0.206587	2.40461	GY	Group1	Stress_Y17
LOC_Os02g49730	NA	pre-mRNA processing ribonucleoprotein, binding region, putative, expressed	2	30398308	30403935	S2_30403821	T/G	2	30403821	3.28264e-05	0.411538	390	0.164556	0.202783	0.229447	TSN	Group2	Stress_Y17
LOC_Os02g49740	NA	expressed protein	2	30405081	30405557	S2_30405461	T/C	2	30405461	9.89274e-10	0.0649038	208	0.104889	0.285275	2.76886	GY	Group1	Stress_Y17
LOC_Os02g50530	NA	retrotransposon protein, putative, Ty1-copia subclass, expressed	2	30854040	30857665	S2_30856157	C/G	2	30856157	8.67898e-05	0.14372	414	0.0226813	0.0601474	0.197967	PN	Group2	Stress_Y17
LOC_Os02g50660	NA	transposon protein, putative, CACTA, En/Spm sub-class, expressed	2	30943536	30948223	S2_30948028	G/T	2	30948028	2.17352e-05	0.383333	390	0.164556	0.204563	13.7356	TSN	Group2	Stress_Y17
LOC_Os02g50680	NA	AAA-type ATPase family protein, putative, expressed	2	30958609	30965278	S2_30958816	A/G	2	30958816	6.975e-05	0.375641	390	0.164556	0.19955	0.921224	TSN	Group2	Stress_Y17
LOC_Os02g50680	NA	AAA-type ATPase family protein, putative, expressed	2	30958609	30965278	S2_30961261	G/A	2	30961261	2.93488e-05	0.379487	390	0.164556	0.203266	0.496704	TSN	Group2	Stress_Y17
LOC_Os02g50680	NA	AAA-type ATPase family protein, putative, expressed	2	30958609	30965278	S2_30962949	G/A	2	30962949	2.51849e-05	0.371795	390	0.164556	0.203926	0.254198	TSN	Group2	Stress_Y17
LOC_Os02g50680	NA	AAA-type ATPase family protein, putative, expressed	2	30958609	30965278	S2_30963161	A/T	2	30963161	3.85578e-05	0.370513	390	0.164556	0.202091	1.26557	TSN	Group2	Stress_Y17
LOC_Os02g50730	OsMMP1	metalloendoproteinase 1 precursor, putative, expressed	2	30980865	30982959	S2_30981088	C/T	2	30981088	9.65615e-05	0.371795	390	0.164556	0.198163	-1.19333	TSN	Group2	Stress_Y17
LOC_Os02g50730	OsMMP1	metalloendoproteinase 1 precursor, putative, expressed	2	30980865	30982959	S2_30982788	C/T	2	30982788	6.98416e-05	0.374359	390	0.164556	0.199545	0.131635	TSN	Group2	Stress_Y17
LOC_Os02g50750	NA	retrotransposon protein, putative, unclassified, expressed	2	30989308	30991033	S2_30989312	A/G	2	30989312	2.25383e-05	0.378205	390	0.164556	0.204406	-0.807708	TSN	Group2	Stress_Y17
LOC_Os02g50750	NA	retrotransposon protein, putative, unclassified, expressed	2	30989308	30991033	S2_30990228	T/C	2	30990228	1.3791e-05	0.235897	390	0.164556	0.206534	0.415797	TSN	Group2	Stress_Y17
LOC_Os02g50750	NA	retrotransposon protein, putative, unclassified, expressed	2	30989308	30991033	S2_30990736	T/A	2	30990736	8.38218e-07	0.420513	390	0.164556	0.218844	-1.16763	TSN	Group2	Stress_Y17
LOC_Os02g50750	NA	retrotransposon protein, putative, unclassified, expressed	2	30989308	30991033	S2_30990922	T/C	2	30990922	8.10194e-05	0.311538	390	0.164556	0.198911	-7.7014	TSN	Group2	Stress_Y17
LOC_Os02g50780	NA	glycosyl hydrolase family 47 domain contain protein, expressed	2	31003959	31008703	S2_31006307	G/C	2	31006307	2.78858e-05	0.378205	390	0.164556	0.203486	2.45819	TSN	Group2	Stress_Y17
LOC_Os02g50790	NA	nuclear-pore anchor, putative, expressed	2	31009161	31014905	S2_31009356	T/C	2	31009356	4.69069e-05	0.385897	390	0.164556	0.201249	-6.07351	TSN	Group2	Stress_Y17
LOC_Os02g50790	NA	nuclear-pore anchor, putative, expressed	2	31009161	31014905	S2_31011015	G/A	2	31011015	4.81478e-05	0.367949	390	0.164556	0.201137	-9.73089	TSN	Group2	Stress_Y17
LOC_Os02g50790	NA	nuclear-pore anchor, putative, expressed	2	31009161	31014905	S2_31011399	G/A	2	31011399	8.21475e-05	0.315385	390	0.164556	0.198852	-0.736491	TSN	Group2	Stress_Y17
LOC_Os02g50790	NA	nuclear-pore anchor, putative, expressed	2	31009161	31014905	S2_31013570	G/C	2	31013570	7.98377e-05	0.385897	390	0.164556	0.198973	-2.00756	TSN	Group2	Stress_Y17
LOC_Os02g50790	NA	nuclear-pore anchor, putative, expressed	2	31009161	31014905	S2_31013745	G/A	2	31013745	6.82337e-05	0.379487	390	0.164556	0.199644	0.267487	TSN	Group2	Stress_Y17
LOC_Os02g50790	NA	nuclear-pore anchor, putative, expressed	2	31009161	31014905	S2_31014704	A/G	2	31014704	2.27998e-05	0.370513	390	0.164556	0.204356	0.284107	TSN	Group2	Stress_Y17
LOC_Os02g50799	NA	nuclear-pore anchor, putative, expressed	2	31023241	31033605	S2_31025084	A/G	2	31025084	8.18945e-05	0.379487	390	0.164556	0.198865	-0.913651	TSN	Group2	Stress_Y17
LOC_Os02g50799	NA	nuclear-pore anchor, putative, expressed	2	31023241	31033605	S2_31026565	T/C	2	31026565	3.151e-05	0.382051	390	0.164556	0.20296	1.28559	TSN	Group2	Stress_Y17
LOC_Os02g50799	NA	nuclear-pore anchor, putative, expressed	2	31023241	31033605	S2_31027616	A/C	2	31027616	6.09785e-05	0.364103	390	0.164556	0.200125	1.03203	TSN	Group2	Stress_Y17
LOC_Os02g50799	NA	nuclear-pore anchor, putative, expressed	2	31023241	31033605	S2_31029720	A/G	2	31029720	2.63225e-05	0.371795	390	0.164556	0.203735	1.10444	TSN	Group2	Stress_Y17
LOC_Os02g50799	NA	nuclear-pore anchor, putative, expressed	2	31023241	31033605	S2_31030113	C/T	2	31030113	4.01051e-05	0.384615	390	0.164556	0.201922	-0.578303	TSN	Group2	Stress_Y17
LOC_Os02g50799	NA	nuclear-pore anchor, putative, expressed	2	31023241	31033605	S2_31030490	A/G	2	31030490	6.72926e-05	0.388462	390	0.164556	0.199704	-0.470448	TSN	Group2	Stress_Y17
LOC_Os02g50799	NA	nuclear-pore anchor, putative, expressed	2	31023241	31033605	S2_31031648	A/C	2	31031648	5.04661e-05	0.314103	390	0.164556	0.200935	0.65928	TSN	Group2	Stress_Y17
LOC_Os02g50799	NA	nuclear-pore anchor, putative, expressed	2	31023241	31033605	S2_31032028	A/G	2	31032028	4.38837e-05	0.374359	390	0.164556	0.201535	-0.757136	TSN	Group2	Stress_Y17
LOC_Os02g50850	NA	BAH domain containing protein, putative, expressed	2	31078543	31083937	S2_31078747	C/T	2	31078747	9.10733e-05	0.375641	390	0.164556	0.198412	1.26628	TSN	Group2	Stress_Y17
LOC_Os02g50880	NA	OsDegp3 - Putative Deg protease homologue, expressed	2	31096163	31101189	S2_31096653	A/C	2	31096653	2.24309e-05	0.323077	390	0.164556	0.204426	0.14065	TSN	Group2	Stress_Y17
LOC_Os02g50880	NA	OsDegp3 - Putative Deg protease homologue, expressed	2	31096163	31101189	S2_31097097	T/C	2	31097097	2.41195e-05	0.382051	390	0.164556	0.204113	-0.614205	TSN	Group2	Stress_Y17
LOC_Os02g50880	NA	OsDegp3 - Putative Deg protease homologue, expressed	2	31096163	31101189	S2_31098092	C/T	2	31098092	5.08224e-05	0.328205	390	0.164556	0.200905	1.14816	TSN	Group2	Stress_Y17
LOC_Os02g50880	NA	OsDegp3 - Putative Deg protease homologue, expressed	2	31096163	31101189	S2_31098436	C/T	2	31098436	1.08041e-05	0.378205	390	0.164556	0.207595	8.63499	TSN	Group2	Stress_Y17
LOC_Os02g50900	NA	expressed protein	2	31111840	31114614	S2_31113784	C/T	2	31113784	1.48687e-05	0.384615	390	0.164556	0.206207	-0.567801	TSN	Group2	Stress_Y17
LOC_Os02g50910	NA	expressed protein	2	31120608	31124019	S2_31123813	G/A	2	31123813	1.26634e-05	0.380769	390	0.164556	0.206904	9.81304	TSN	Group2	Stress_Y17
LOC_Os02g50950	NA	expressed protein	2	31150338	31151860	S2_31150941	C/T	2	31150941	2.58362e-05	0.391026	390	0.164556	0.203816	0.23321	TSN	Group2	Stress_Y17
LOC_Os02g50950	NA	expressed protein	2	31150338	31151860	S2_31150971	G/A	2	31150971	5.49104e-05	0.342308	390	0.164556	0.200574	-0.624562	TSN	Group2	Stress_Y17
LOC_Os02g50950	NA	expressed protein	2	31150338	31151860	S2_31150986	A/G	2	31150986	2.31733e-05	0.389744	390	0.164556	0.204286	1.4709	TSN	Group2	Stress_Y17
LOC_Os02g50950	NA	expressed protein	2	31150338	31151860	S2_31150989	A/G	2	31150989	2.19838e-05	0.389744	390	0.164556	0.204513	-1.26347	TSN	Group2	Stress_Y17
LOC_Os02g50960	OsPIN1|REH1|PIN1b	auxin efflux carrier component, putative, expressed	2	31158903	31162062	S2_31162025	A/G	2	31162025	5.91854e-05	0.389744	390	0.164556	0.200253	-0.94633	TSN	Group2	Stress_Y17
LOC_Os02g50990	NA	RING-H2 finger protein ATL1Q, putative, expressed	2	31190742	31195241	S2_31190783	G/A	2	31190783	5.52004e-05	0.302564	390	0.164556	0.200551	-0.0622943	TSN	Group2	Stress_Y17
LOC_Os02g52020	NA	retrotransposon protein, putative, Ty1-copia subclass, expressed	2	31842860	31846978	S2_31846920	T/A	2	31846920	1.09378e-06	0.361538	390	0.164556	0.217662	2.87247	TSN	Group2	Stress_Y17
LOC_Os02g52300	NA	CPuORF38 - conserved peptide uORF-containing transcript, expressed	2	32021572	32023233	S2_32021608	G/C	2	32021608	2.96473e-05	0.273077	390	0.164556	0.203222	0.140382	TSN	Group2	Stress_Y17
LOC_Os02g52390	NA	M16 domain containing zinc peptidase, putative, expressed	2	32062238	32070456	S2_32066171	C/T	2	32066171	6.97138e-05	0.267949	390	0.164556	0.199552	-3.42057	TSN	Group2	Stress_Y17
LOC_Os02g52410	NA	expressed protein	2	32071208	32080488	S2_32075498	T/C	2	32075498	7.80085e-05	0.278205	390	0.164556	0.199072	-3.84974	TSN	Group2	Stress_Y17
LOC_Os02g52410	NA	expressed protein	2	32071208	32080488	S2_32075506	T/G	2	32075506	9.1129e-05	0.14359	390	0.164556	0.19841	2.95435	TSN	Group2	Stress_Y17
LOC_Os02g52420	NA	peptidase, M24 family protein, putative, expressed	2	32081282	32085569	S2_32083255	G/A	2	32083255	3.77155e-05	0.269231	390	0.164556	0.202186	-4.1316	TSN	Group2	Stress_Y17
LOC_Os02g52430	NA	regulator of ribonuclease, putative, expressed	2	32088082	32090304	S2_32090060	A/G	2	32090060	8.2684e-06	0.288462	390	0.164556	0.20876	2.80769	TSN	Group2	Stress_Y17
LOC_Os02g52430	NA	regulator of ribonuclease, putative, expressed	2	32088082	32090304	S2_32090061	C/G	2	32090061	1.14106e-05	0.284615	390	0.164556	0.207357	-1.83339	TSN	Group2	Stress_Y17
LOC_Os02g52430	NA	regulator of ribonuclease, putative, expressed	2	32088082	32090304	S2_32090082	G/A	2	32090082	5.97848e-05	0.285897	390	0.164556	0.20021	-3.48455	TSN	Group2	Stress_Y17
LOC_Os02g52430	NA	regulator of ribonuclease, putative, expressed	2	32088082	32090304	S2_32090083	T/A	2	32090083	3.9476e-05	0.282051	390	0.164556	0.20199	3.50485	TSN	Group2	Stress_Y17
LOC_Os02g52450	NA	regulator of ribonuclease, putative, expressed	2	32092648	32094809	S2_32093595	T/C	2	32093595	6.21999e-05	0.271795	390	0.164556	0.20004	-3.83159	TSN	Group2	Stress_Y17
LOC_Os02g52450	NA	regulator of ribonuclease, putative, expressed	2	32092648	32094809	S2_32093781	T/C	2	32093781	9.46417e-05	0.282051	390	0.164556	0.198248	-4.76439	TSN	Group2	Stress_Y17
LOC_Os02g52450	NA	regulator of ribonuclease, putative, expressed	2	32092648	32094809	S2_32094328	C/A	2	32094328	5.53107e-05	0.283333	390	0.164556	0.200543	3.18766	TSN	Group2	Stress_Y17
LOC_Os02g52450	NA	regulator of ribonuclease, putative, expressed	2	32092648	32094809	S2_32094496	G/A	2	32094496	9.44749e-05	0.273077	390	0.164556	0.198256	3.97685	TSN	Group2	Stress_Y17
LOC_Os02g52450	NA	regulator of ribonuclease, putative, expressed	2	32092648	32094809	S2_32094525	C/A	2	32094525	4.01223e-05	0.265385	390	0.164556	0.20192	2.56845	TSN	Group2	Stress_Y17
LOC_Os02g52450	NA	regulator of ribonuclease, putative, expressed	2	32092648	32094809	S2_32094527	G/A	2	32094527	4.01223e-05	0.265385	390	0.164556	0.20192	3.55691	TSN	Group2	Stress_Y17
LOC_Os02g52450	NA	regulator of ribonuclease, putative, expressed	2	32092648	32094809	S2_32094532	A/T	2	32094532	8.71811e-05	0.266667	390	0.164556	0.198598	4.53729	TSN	Group2	Stress_Y17
LOC_Os02g52450	NA	regulator of ribonuclease, putative, expressed	2	32092648	32094809	S2_32094557	G/C	2	32094557	9.95676e-05	0.265385	390	0.164556	0.198032	-4.05579	TSN	Group2	Stress_Y17
LOC_Os02g52450	NA	regulator of ribonuclease, putative, expressed	2	32092648	32094809	S2_32094587	G/A	2	32094587	6.43215e-05	0.267949	390	0.164556	0.199897	-2.73118	TSN	Group2	Stress_Y17
LOC_Os02g52450	NA	regulator of ribonuclease, putative, expressed	2	32092648	32094809	S2_32094649	G/A	2	32094649	8.39774e-05	0.274359	390	0.164556	0.198758	-4.05145	TSN	Group2	Stress_Y17
LOC_Os02g52450	NA	regulator of ribonuclease, putative, expressed	2	32092648	32094809	S2_32094763	T/C	2	32094763	9.36255e-05	0.275641	390	0.164556	0.198294	4.24704	TSN	Group2	Stress_Y17
LOC_Os02g52460	NA	zinc knuckle domain containing protein, expressed	2	32095322	32098710	S2_32096338	G/A	2	32096338	3.73606e-05	0.270513	390	0.164556	0.202227	-4.00842	TSN	Group2	Stress_Y17
LOC_Os02g52460	NA	zinc knuckle domain containing protein, expressed	2	32095322	32098710	S2_32096351	A/C	2	32096351	4.97626e-05	0.283333	390	0.164556	0.200996	3.76533	TSN	Group2	Stress_Y17
LOC_Os02g52460	NA	zinc knuckle domain containing protein, expressed	2	32095322	32098710	S2_32096353	T/A	2	32096353	7.65997e-05	0.282051	390	0.164556	0.19915	-2.73595	TSN	Group2	Stress_Y17
LOC_Os02g52460	NA	zinc knuckle domain containing protein, expressed	2	32095322	32098710	S2_32096390	G/A	2	32096390	8.37683e-05	0.274359	390	0.164556	0.198769	-3.91799	TSN	Group2	Stress_Y17
LOC_Os02g52460	NA	zinc knuckle domain containing protein, expressed	2	32095322	32098710	S2_32096955	A/G	2	32096955	5.26925e-05	0.274359	390	0.164556	0.20075	NA	TSN	Group2	Stress_Y17
LOC_Os02g52460	NA	zinc knuckle domain containing protein, expressed	2	32095322	32098710	S2_32097180	T/C	2	32097180	6.93468e-05	0.273077	390	0.164556	0.199575	3.8377	TSN	Group2	Stress_Y17
LOC_Os02g52460	NA	zinc knuckle domain containing protein, expressed	2	32095322	32098710	S2_32097313	G/A	2	32097313	7.79316e-05	0.278205	390	0.164556	0.199077	3.67724	TSN	Group2	Stress_Y17
LOC_Os02g52460	NA	zinc knuckle domain containing protein, expressed	2	32095322	32098710	S2_32097577	C/T	2	32097577	4.25705e-05	0.273077	390	0.164556	0.201666	3.10309	TSN	Group2	Stress_Y17
LOC_Os02g52460	NA	zinc knuckle domain containing protein, expressed	2	32095322	32098710	S2_32097743	C/G	2	32097743	3.81146e-05	0.275641	390	0.164556	0.202141	-2.4564	TSN	Group2	Stress_Y17
LOC_Os02g52460	NA	zinc knuckle domain containing protein, expressed	2	32095322	32098710	S2_32097753	C/A	2	32097753	1.98005e-05	0.279487	390	0.164556	0.204966	2.63177	TSN	Group2	Stress_Y17
LOC_Os02g52460	NA	zinc knuckle domain containing protein, expressed	2	32095322	32098710	S2_32098165	A/T	2	32098165	8.11424e-05	0.287179	390	0.164556	0.198904	5.25462	TSN	Group2	Stress_Y17
LOC_Os02g52470	NA	ATP-binding domain-containing protein, putative, expressed	2	32099086	32102975	S2_32099891	G/A	2	32099891	5.46473e-05	0.271795	390	0.164556	0.200594	4.5619	TSN	Group2	Stress_Y17
LOC_Os02g52840	FLS	flavonol synthase/flavanone 3-hydroxylase, putative, expressed	2	32310799	32312184	S2_32311846	A/G	2	32311846	7.44513e-05	0.194444	216	0.101872	0.171064	NA	TSN	Group1	Stress_Y17
LOC_Os02g53020	NA	transposon protein, putative, CACTA, En/Spm sub-class, expressed	2	32447893	32451281	S2_32450388	A/C	2	32450388	4.07814e-05	0.0652174	414	0.0226813	0.0636984	0.0805426	PN	Group2	Stress_Y17
LOC_Os02g54210	NA	retrotransposon protein, putative, unclassified, expressed	2	33235639	33240969	S2_33238539	T/C	2	33238539	3.91016e-05	0.248718	390	0.164556	0.202031	3.05787	TSN	Group2	Stress_Y17
LOC_Os02g57250	OsIAA10	OsIAA10 - Auxin-responsive Aux/IAA gene family member, expressed	2	35073371	35075801	S2_35074430	A/G	2	35074430	9.86838e-05	0.108974	390	0.164556	0.19807	1.24282	TSN	Group2	Stress_Y17
LOC_Os02g57410	NA	OTU-like cysteine protease family protein, putative, expressed	2	35178242	35184158	S2_35178955	T/C	2	35178955	5.70481e-05	0.1	390	0.164556	0.20041	1.82888	TSN	Group2	Stress_Y17
LOC_Os02g57420	NA	protein kinase APK1A, chloroplast precursor, putative, expressed	2	35190393	35194311	S2_35191039	A/G	2	35191039	1.4173e-05	0.0910256	390	0.164556	0.206415	-1.26276	TSN	Group2	Stress_Y17
LOC_Os02g57430	NA	DNL zinc finger domain containing protein, putative, expressed	2	35199415	35200928	S2_35199472	A/C	2	35199472	2.10311e-05	0.0987179	390	0.164556	0.204705	-4.52518	TSN	Group2	Stress_Y17
LOC_Os02g57430	NA	DNL zinc finger domain containing protein, putative, expressed	2	35199415	35200928	S2_35200080	T/C	2	35200080	9.11907e-05	0.0961538	390	0.164556	0.198407	-1.53898	TSN	Group2	Stress_Y17
LOC_Os02g57430	NA	DNL zinc finger domain containing protein, putative, expressed	2	35199415	35200928	S2_35200356	A/C	2	35200356	7.94178e-05	0.0974359	390	0.164556	0.198996	3.37565	TSN	Group2	Stress_Y17
LOC_Os02g57450	NA	Ser/Thr protein phosphatase family protein, putative, expressed	2	35207612	35211426	S2_35208259	T/C	2	35208259	8.84117e-05	0.1	390	0.164556	0.198539	-3.40302	TSN	Group2	Stress_Y17
LOC_Os02g57450	NA	Ser/Thr protein phosphatase family protein, putative, expressed	2	35207612	35211426	S2_35208967	T/C	2	35208967	8.4897e-05	0.105128	390	0.164556	0.198711	0.693437	TSN	Group2	Stress_Y17
LOC_Os02g57450	NA	Ser/Thr protein phosphatase family protein, putative, expressed	2	35207612	35211426	S2_35211376	A/C	2	35211376	5.21885e-05	0.0974359	390	0.164556	0.200792	2.32161	TSN	Group2	Stress_Y17
LOC_Os02g57460	NA	RING-H2 finger protein ATL5G, putative, expressed	2	35216213	35217836	S2_35216593	C/G	2	35216593	3.31466e-05	0.0948718	390	0.164556	0.202742	-3.96699	TSN	Group2	Stress_Y17
LOC_Os02g57460	NA	RING-H2 finger protein ATL5G, putative, expressed	2	35216213	35217836	S2_35216987	A/G	2	35216987	6.97346e-05	0.0910256	390	0.164556	0.199551	-2.77582	TSN	Group2	Stress_Y17
LOC_Os02g57460	NA	RING-H2 finger protein ATL5G, putative, expressed	2	35216213	35217836	S2_35217191	C/T	2	35217191	7.86265e-05	0.103846	390	0.164556	0.199039	-2.53707	TSN	Group2	Stress_Y17
LOC_Os02g57460	NA	RING-H2 finger protein ATL5G, putative, expressed	2	35216213	35217836	S2_35217348	T/G	2	35217348	9.05686e-05	0.0935897	390	0.164556	0.198436	6.27576	TSN	Group2	Stress_Y17
LOC_Os02g57460	NA	RING-H2 finger protein ATL5G, putative, expressed	2	35216213	35217836	S2_35217669	A/G	2	35217669	3.18179e-05	0.0974359	390	0.164556	0.202918	1.93341	TSN	Group2	Stress_Y17
LOC_Os02g57470	NA	tetratricopeptide repeat containing protein, putative, expressed	2	35218310	35221098	S2_35219907	A/G	2	35219907	1.41362e-05	0.0974359	390	0.164556	0.206426	-3.96499	TSN	Group2	Stress_Y17
LOC_Os02g57470	NA	tetratricopeptide repeat containing protein, putative, expressed	2	35218310	35221098	S2_35219911	A/T	2	35219911	1.32111e-05	0.0961538	390	0.164556	0.20672	2.13076	TSN	Group2	Stress_Y17
LOC_Os02g57470	NA	tetratricopeptide repeat containing protein, putative, expressed	2	35218310	35221098	S2_35220825	T/C	2	35220825	8.94561e-06	0.0923077	390	0.164556	0.208417	0.27878	TSN	Group2	Stress_Y17
LOC_Os02g57500	NA	expressed protein	2	35230702	35233962	S2_35230706	A/C	2	35230706	7.65973e-05	0.111538	390	0.164556	0.19915	2.28607	TSN	Group2	Stress_Y17
LOC_Os02g57500	NA	expressed protein	2	35230702	35233962	S2_35230707	G/A	2	35230707	7.65973e-05	0.111538	390	0.164556	0.19915	-1.3254	TSN	Group2	Stress_Y17
LOC_Os02g57500	NA	expressed protein	2	35230702	35233962	S2_35230941	G/A	2	35230941	1.17882e-05	0.115385	390	0.164556	0.207216	3.74918	TSN	Group2	Stress_Y17
LOC_Os02g57500	NA	expressed protein	2	35230702	35233962	S2_35231370	A/G	2	35231370	3.35639e-05	0.112821	390	0.164556	0.202688	3.34016	TSN	Group2	Stress_Y17
LOC_Os02g57500	NA	expressed protein	2	35230702	35233962	S2_35231416	G/A	2	35231416	7.33702e-05	0.123077	390	0.164556	0.199334	4.72407	TSN	Group2	Stress_Y17
LOC_Os02g57500	NA	expressed protein	2	35230702	35233962	S2_35231423	C/T	2	35231423	6.13649e-05	0.119231	390	0.164556	0.200098	-4.30337	TSN	Group2	Stress_Y17
LOC_Os02g57500	NA	expressed protein	2	35230702	35233962	S2_35231970	T/C	2	35231970	5.10781e-05	0.111538	390	0.164556	0.200884	-9.4049	TSN	Group2	Stress_Y17
LOC_Os02g57500	NA	expressed protein	2	35230702	35233962	S2_35232755	T/A	2	35232755	3.31171e-05	0.121795	390	0.164556	0.202745	-0.432984	TSN	Group2	Stress_Y17
LOC_Os02g57500	NA	expressed protein	2	35230702	35233962	S2_35232851	T/G	2	35232851	6.43394e-05	0.110256	390	0.164556	0.199895	1.70263	TSN	Group2	Stress_Y17
LOC_Os02g57500	NA	expressed protein	2	35230702	35233962	S2_35232905	A/G	2	35232905	3.7561e-05	0.117949	390	0.164556	0.202204	-0.672362	TSN	Group2	Stress_Y17
LOC_Os02g57510	NA	SNARE domain containing protein, putative, expressed	2	35234126	35238028	S2_35234302	T/G	2	35234302	5.31254e-05	0.110256	390	0.164556	0.200715	-2.53304	TSN	Group2	Stress_Y17
LOC_Os02g57510	NA	SNARE domain containing protein, putative, expressed	2	35234126	35238028	S2_35234479	C/T	2	35234479	7.68537e-05	0.115385	390	0.164556	0.199136	0.589403	TSN	Group2	Stress_Y17
LOC_Os02g57510	NA	SNARE domain containing protein, putative, expressed	2	35234126	35238028	S2_35234612	T/C	2	35234612	7.45152e-05	0.114103	390	0.164556	0.199268	-3.31047	TSN	Group2	Stress_Y17
LOC_Os02g57510	NA	SNARE domain containing protein, putative, expressed	2	35234126	35238028	S2_35234967	T/C	2	35234967	6.93265e-05	0.112821	390	0.164556	0.199576	2.60477	TSN	Group2	Stress_Y17
LOC_Os02g57510	NA	SNARE domain containing protein, putative, expressed	2	35234126	35238028	S2_35235556	C/G	2	35235556	5.89673e-05	0.121795	390	0.164556	0.200268	0.345053	TSN	Group2	Stress_Y17
LOC_Os02g57510	NA	SNARE domain containing protein, putative, expressed	2	35234126	35238028	S2_35235716	G/C	2	35235716	2.84115e-05	0.111538	390	0.164556	0.203406	0.205925	TSN	Group2	Stress_Y17
LOC_Os02g57510	NA	SNARE domain containing protein, putative, expressed	2	35234126	35238028	S2_35236603	G/A	2	35236603	2.74207e-05	0.112821	390	0.164556	0.203559	6.58336	TSN	Group2	Stress_Y17
LOC_Os02g57510	NA	SNARE domain containing protein, putative, expressed	2	35234126	35238028	S2_35236681	A/G	2	35236681	2.47732e-05	0.112821	390	0.164556	0.203997	-0.729225	TSN	Group2	Stress_Y17
LOC_Os02g57510	NA	SNARE domain containing protein, putative, expressed	2	35234126	35238028	S2_35237381	C/T	2	35237381	4.09407e-05	0.202564	390	0.164556	0.201833	1.8566	TSN	Group2	Stress_Y17
LOC_Os02g57510	NA	SNARE domain containing protein, putative, expressed	2	35234126	35238028	S2_35237551	A/T	2	35237551	2.92138e-05	0.198718	390	0.164556	0.203286	1.23845	TSN	Group2	Stress_Y17
LOC_Os02g57540	NA	60S ribosomal protein L28-1, putative, expressed	2	35256139	35258235	S2_35256914	A/T	2	35256914	9.14424e-05	0.14359	390	0.164556	0.198395	-0.980065	TSN	Group2	Stress_Y17
LOC_Os03g07480	OsSUT1	sucrose transporter, putativ, expressed	3	3797691	3804132	S3_3799201	A/G	3	3799201	4.57199e-05	0.122596	208	0.104889	0.181066	-1.18919	GY	Group1	Stress_Y17
LOC_Os03g07480	OsSUT1	sucrose transporter, putativ, expressed	3	3797691	3804132	S3_3803487	T/C	3	3803487	3.12925e-05	0.132212	208	0.104889	0.184509	-1.23925	GY	Group1	Stress_Y17
LOC_Os03g11734	OsFRDL1	MATE efflux protein, putative, expressed	3	6131845	6142785	S3_6140974	A/G	3	6140974	4.71222e-05	0.456311	206	0.0254951	0.108986	-12.7867	SSR	Group1	Stress_Y17
LOC_Os03g12160	NA	leucine-rich repeat family protein, putative, expressed	3	6377128	6388758	S3_6385825	A/G	3	6385825	7.24484e-05	0.0848416	442	0.0177114	0.0537097	-0.08522	SN	Group2	Stress_Y17
LOC_Os03g12210	NA	expressed protein	3	6403235	6406930	S3_6405116	T/C	3	6405116	8.573e-05	0.0950226	442	0.0177114	0.0529691	-0.111817	SN	Group2	Stress_Y17
LOC_Os03g12310	NA	retrotransposon protein, putative, unclassified, expressed	3	6480424	6487514	S3_6481697	T/G	3	6481697	2.5828e-05	0.364078	206	0.0254951	0.115001	NA	SSR	Group1	Stress_Y17
LOC_Os03g14642	NA	LTPL107 - Protease inhibitor/seed storage/LTP family protein precursor, expressed	3	7958992	7959882	S3_7959768	C/T	3	7959768	1.29484e-05	0.132212	208	0.104889	0.192595	-8.0094	GY	Group1	Stress_Y17
LOC_Os03g14760	NA	retrotransposon protein, putative, unclassified, expressed	3	8024487	8027420	S3_8025176	C/T	3	8025176	2.27899e-05	0.0600962	208	0.104889	0.187403	7.89701	GY	Group1	Stress_Y17
LOC_Os03g14910	NA	expressed protein	3	8130192	8131506	S3_8131107	G/A	3	8131107	9.9208e-06	0.0961538	208	0.104889	0.195055	-5.20533	GY	Group1	Stress_Y17
LOC_Os03g16230	NA	oxidoreductase, short chain dehydrogenase/reductase family protein, putative, expressed	3	8949956	8952243	S3_8950142	G/T	3	8950142	2.17375e-05	0.329186	442	0.0177114	0.0590421	0.676584	SN	Group2	Stress_Y17
LOC_Os03g16230	NA	oxidoreductase, short chain dehydrogenase/reductase family protein, putative, expressed	3	8949956	8952243	S3_8950143	T/G	3	8950143	1.98166e-05	0.322398	442	0.0177114	0.0594544	-0.189891	SN	Group2	Stress_Y17
LOC_Os03g33760	NA	retrotransposon protein, putative, unclassified, expressed	3	19298845	19304398	S3_19300008	T/C	3	19300008	3.62756e-05	0.213942	208	0.104889	0.183165	0.230776	GY	Group1	Stress_Y17
LOC_Os03g47560	NA	retrotransposon protein, putative, unclassified, expressed	3	26892010	26896399	S3_26892642	C/T	3	26892642	9.32772e-05	0.0757919	442	0.0177114	0.0525984	0.0356811	SN	Group2	Stress_Y17
LOC_Os03g47580	NA	ubiquitin-conjugating enzyme, putative, expressed	3	26916173	26924643	S3_26924458	G/A	3	26924458	6.03468e-05	0.0735294	442	0.0177114	0.0545152	0.0114297	SN	Group2	Stress_Y17
LOC_Os03g48690	NA	retrotransposon protein, putative, unclassified, expressed	3	27752287	27755346	S3_27752385	A/G	3	27752385	1.08095e-05	0.0673077	208	0.104889	0.194261	-0.036564	GY	Group1	Stress_Y17
LOC_Os03g60930	NA	RNA recognition motif containing protein, putative, expressed	3	34618257	34625453	S3_34619251	A/C	3	34619251	5.90956e-05	0.0804598	261	0.291989	0.337952	0.532462	HD	Group1	Stress_Y17
LOC_Os04g02860	NA	disease resistance protein RPM1, putative, expressed	4	1113475	1118619	S4_1114993	A/G	4	1114993	8.51524e-05	0.0913462	208	0.104889	0.17546	-4.90306	GY	Group1	Stress_Y17
LOC_Os04g02860	NA	disease resistance protein RPM1, putative, expressed	4	1113475	1118619	S4_1115003	A/G	4	1115003	5.77024e-06	0.0576923	208	0.104889	0.200087	0.721377	GY	Group1	Stress_Y17
LOC_Os04g02860	NA	disease resistance protein RPM1, putative, expressed	4	1113475	1118619	S4_1115004	A/C	4	1115004	5.77024e-06	0.0576923	208	0.104889	0.200087	-7.0415	GY	Group1	Stress_Y17
LOC_Os04g02860	NA	disease resistance protein RPM1, putative, expressed	4	1113475	1118619	S4_1115264	T/C	4	1115264	8.87534e-07	0.0913462	208	0.104889	0.217745	-7.03972	GY	Group1	Stress_Y17
LOC_Os04g02860	NA	disease resistance protein RPM1, putative, expressed	4	1113475	1118619	S4_1115332	G/A	4	1115332	2.12524e-06	0.09375	208	0.104889	0.209457	1.55016	GY	Group1	Stress_Y17
LOC_Os04g02900	NA	dehydrogenase E1 component domain containing protein, expressed	4	1135879	1139939	S4_1135884	T/C	4	1135884	1.29384e-05	0.0913462	208	0.104889	0.192602	1.92731	GY	Group1	Stress_Y17
LOC_Os04g02900	NA	dehydrogenase E1 component domain containing protein, expressed	4	1135879	1139939	S4_1135977	A/C	4	1135977	2.75584e-05	0.0528846	208	0.104889	0.185667	-0.244846	GY	Group1	Stress_Y17
LOC_Os04g02960	NA	OsSub32 - Putative Subtilisin homologue, expressed	4	1184349	1197096	S4_1191440	A/T	4	1191440	7.42382e-05	0.0534884	215	0.0572061	0.130223	2.86083	FGN	Group1	Stress_Y17
LOC_Os04g03050	NA	OsSub34 - Putative Subtilisin homologue, expressed	4	1248450	1260291	S4_1254606	G/T	4	1254606	8.05181e-05	0.0581395	215	0.0572061	0.129482	8.71739	FGN	Group1	Stress_Y17
LOC_Os04g03050	NA	OsSub34 - Putative Subtilisin homologue, expressed	4	1248450	1260291	S4_1256394	A/G	4	1256394	1.39099e-05	0.0651163	215	0.0572061	0.1457	NA	FGN	Group1	Stress_Y17
LOC_Os04g03796	NA	OsSub37 - Putative Subtilisin homologue, expressed	4	1702003	1710519	S4_1705856	C/T	4	1705856	5.43422e-06	0.0673077	208	0.104889	0.200647	-3.5676	GY	Group1	Stress_Y17
LOC_Os04g03796	NA	OsSub37 - Putative Subtilisin homologue, expressed	4	1702003	1710519	S4_1709572	A/G	4	1709572	8.54174e-05	0.0504808	208	0.104889	0.175432	2.64362	GY	Group1	Stress_Y17
LOC_Os04g03796	NA	OsSub37 - Putative Subtilisin homologue, expressed	4	1702003	1710519	S4_1709945	A/G	4	1709945	1.44033e-05	0.0504808	208	0.104889	0.191614	4.36157	GY	Group1	Stress_Y17
LOC_Os04g03796	NA	OsSub37 - Putative Subtilisin homologue, expressed	4	1702003	1710519	S4_1709976	T/C	4	1709976	7.24192e-05	0.0552885	208	0.104889	0.176915	-2.5164	GY	Group1	Stress_Y17
LOC_Os04g03796	NA	OsSub37 - Putative Subtilisin homologue, expressed	4	1702003	1710519	S4_1710003	A/C	4	1710003	5.412e-05	0.0552885	208	0.104889	0.17954	-2.13472	GY	Group1	Stress_Y17
LOC_Os04g03796	NA	OsSub37 - Putative Subtilisin homologue, expressed	4	1702003	1710519	S4_1710356	C/T	4	1710356	2.10614e-05	0.0673077	208	0.104889	0.188125	-3.1672	GY	Group1	Stress_Y17
LOC_Os04g03810	NA	OsSub38 - Putative Subtilisin homologue, expressed	4	1714652	1720355	S4_1714848	C/T	4	1714848	2.85912e-05	0.0504808	208	0.104889	0.185332	-3.01159	GY	Group1	Stress_Y17
LOC_Os04g03810	NA	OsSub38 - Putative Subtilisin homologue, expressed	4	1714652	1720355	S4_1715299	A/T	4	1715299	3.18717e-05	0.0552885	208	0.104889	0.184342	2.04083	GY	Group1	Stress_Y17
LOC_Os04g03810	NA	OsSub38 - Putative Subtilisin homologue, expressed	4	1714652	1720355	S4_1715633	T/C	4	1715633	6.56877e-06	0.0552885	208	0.104889	0.19888	NA	GY	Group1	Stress_Y17
LOC_Os04g03810	NA	OsSub38 - Putative Subtilisin homologue, expressed	4	1714652	1720355	S4_1715636	A/G	4	1715636	2.09269e-05	0.0552885	208	0.104889	0.188183	-1.35936	GY	Group1	Stress_Y17
LOC_Os04g03810	NA	OsSub38 - Putative Subtilisin homologue, expressed	4	1714652	1720355	S4_1716661	G/T	4	1716661	1.92923e-05	0.0504808	208	0.104889	0.188929	-2.07655	GY	Group1	Stress_Y17
LOC_Os04g03810	NA	OsSub38 - Putative Subtilisin homologue, expressed	4	1714652	1720355	S4_1716855	C/T	4	1716855	3.9308e-05	0.0528846	208	0.104889	0.182436	1.49027	GY	Group1	Stress_Y17
LOC_Os04g05030	NA	serine-rich 25 kDa antigen protein, putative, expressed	4	2441510	2447788	S4_2445497	A/G	4	2445497	4.53852e-05	0.0528846	208	0.104889	0.181132	-2.64061	GY	Group1	Stress_Y17
LOC_Os04g08670	NA	retrotransposon protein, putative, unclassified, expressed	4	4708412	4711441	S4_4711278	T/C	4	4711278	2.11495e-05	0.103365	208	0.104889	0.188086	-2.66444	GY	Group1	Stress_Y17
LOC_Os04g08828	NA	cytochrome P450, putative, expressed	4	4874374	4878345	S4_4875618	A/T	4	4875618	9.03743e-05	0.0961538	208	0.104889	0.174926	0.265641	GY	Group1	Stress_Y17
LOC_Os04g09450	NA	expressed protein	4	5059699	5060958	S4_5060104	G/A	4	5060104	2.94674e-05	0.0913462	208	0.104889	0.185057	1.81906	GY	Group1	Stress_Y17
LOC_Os04g09460	NA	retrotransposon protein, putative, Ty3-gypsy subclass, expressed	4	5064784	5069776	S4_5066277	G/A	4	5066277	6.10196e-05	0.0961538	208	0.104889	0.178457	2.00346	GY	Group1	Stress_Y17
LOC_Os04g09460	NA	retrotransposon protein, putative, Ty3-gypsy subclass, expressed	4	5064784	5069776	S4_5069135	G/A	4	5069135	2.39722e-05	0.105769	208	0.104889	0.18694	-2.19719	GY	Group1	Stress_Y17
LOC_Os04g09460	NA	retrotransposon protein, putative, Ty3-gypsy subclass, expressed	4	5064784	5069776	S4_5069482	C/T	4	5069482	9.52506e-05	0.103365	208	0.104889	0.174456	0.30605	GY	Group1	Stress_Y17
LOC_Os04g09470	NA	retrotransposon protein, putative, Ty3-gypsy subclass, expressed	4	5070583	5076278	S4_5071044	G/A	4	5071044	1.82039e-05	0.105769	208	0.104889	0.189461	1.56175	GY	Group1	Stress_Y17
LOC_Os04g09470	NA	retrotransposon protein, putative, Ty3-gypsy subclass, expressed	4	5070583	5076278	S4_5071856	C/A	4	5071856	5.94068e-06	0.0817308	208	0.104889	0.199816	-1.91554	GY	Group1	Stress_Y17
LOC_Os04g09470	NA	retrotransposon protein, putative, Ty3-gypsy subclass, expressed	4	5070583	5076278	S4_5071888	C/T	4	5071888	9.05598e-05	0.0913462	208	0.104889	0.174908	1.56143	GY	Group1	Stress_Y17
LOC_Os04g09470	NA	retrotransposon protein, putative, Ty3-gypsy subclass, expressed	4	5070583	5076278	S4_5074210	T/C	4	5074210	4.27175e-05	0.0961538	208	0.104889	0.181681	-0.764589	GY	Group1	Stress_Y17
LOC_Os04g09470	NA	retrotransposon protein, putative, Ty3-gypsy subclass, expressed	4	5070583	5076278	S4_5074659	G/A	4	5074659	3.28368e-05	0.103365	208	0.104889	0.184071	1.92307	GY	Group1	Stress_Y17
LOC_Os04g09470	NA	retrotransposon protein, putative, Ty3-gypsy subclass, expressed	4	5070583	5076278	S4_5076102	C/T	4	5076102	4.56425e-05	0.0985577	208	0.104889	0.181081	0.128959	GY	Group1	Stress_Y17
LOC_Os04g09520	NA	LTPL59 - Protease inhibitor/seed storage/LTP family protein precursor, putative, expressed	4	5095629	5098648	S4_5095978	C/T	4	5095978	7.90946e-05	0.103365	208	0.104889	0.176123	-2.42277	GY	Group1	Stress_Y17
LOC_Os04g09550	NA	expressed protein	4	5128095	5129804	S4_5128681	T/A	4	5128681	6.84631e-05	0.0913462	208	0.104889	0.17742	-1.83625	GY	Group1	Stress_Y17
LOC_Os04g09580	NA	expressed protein	4	5135227	5142143	S4_5138326	T/C	4	5138326	2.07385e-05	0.0841346	208	0.104889	0.188266	-1.37128	GY	Group1	Stress_Y17
LOC_Os04g09580	NA	expressed protein	4	5135227	5142143	S4_5140987	C/T	4	5140987	7.1088e-06	0.09375	208	0.104889	0.198145	NA	GY	Group1	Stress_Y17
LOC_Os04g09604	NA	O-methyltransferase, putative, expressed	4	5161917	5167494	S4_5163007	A/G	4	5163007	9.54895e-05	0.0913462	208	0.104889	0.174433	-0.252754	GY	Group1	Stress_Y17
LOC_Os04g09604	NA	O-methyltransferase, putative, expressed	4	5161917	5167494	S4_5163023	A/G	4	5163023	3.76381e-05	0.0913462	208	0.104889	0.18283	0.741484	GY	Group1	Stress_Y17
LOC_Os04g09604	NA	O-methyltransferase, putative, expressed	4	5161917	5167494	S4_5163048	T/A	4	5163048	1.59723e-05	0.0985577	208	0.104889	0.190662	0.741484	GY	Group1	Stress_Y17
LOC_Os04g09900	OsCPS4|OsCyc1	ent-kaurene synthase, chloroplast precursor, putative, expressed	4	5318060	5326427	S4_5320968	C/T	4	5320968	9.68018e-05	0.0856481	216	0.101872	0.168797	-3.85104	TSN	Group1	Stress_Y17
LOC_Os04g09900	OsCPS4|OsCyc1	ent-kaurene synthase, chloroplast precursor, putative, expressed	4	5318060	5326427	S4_5320972	T/A	4	5320972	8.83906e-05	0.0833333	216	0.101872	0.169581	-0.208092	TSN	Group1	Stress_Y17
LOC_Os04g09900	OsCPS4|OsCyc1	ent-kaurene synthase, chloroplast precursor, putative, expressed	4	5318060	5326427	S4_5320972	T/A	4	5320972	8.59149e-05	0.0865385	208	0.104889	0.17538	0.444636	GY	Group1	Stress_Y17
LOC_Os04g10240	NA	nicotiana lesion-inducing like, putative, expressed	4	5526857	5530346	S4_5529954	C/T	4	5529954	7.71934e-05	0.194712	208	0.104889	0.176341	0.264216	GY	Group1	Stress_Y17
LOC_Os04g10360	NA	OsSub40 - Putative Subtilisin homologue, expressed	4	5596642	5599067	S4_5597802	G/T	4	5597802	6.31009e-05	0.0576923	208	0.104889	0.178155	1.20954	GY	Group1	Stress_Y17
LOC_Os04g10410	NA	amidase, putative, expressed	4	5644929	5649613	S4_5646387	T/C	4	5646387	2.90129e-05	0.1875	208	0.104889	0.185198	2.93869	GY	Group1	Stress_Y17
LOC_Os04g10410	NA	amidase, putative, expressed	4	5644929	5649613	S4_5647484	A/T	4	5647484	1.94131e-06	0.1875	208	0.104889	0.210312	-0.797339	GY	Group1	Stress_Y17
LOC_Os04g10410	NA	amidase, putative, expressed	4	5644929	5649613	S4_5648282	G/A	4	5648282	1.643e-05	0.0552885	208	0.104889	0.190403	2.19197	GY	Group1	Stress_Y17
LOC_Os04g10420	NA	CW7, putative, expressed	4	5655847	5666499	S4_5661531	A/G	4	5661531	4.80256e-05	0.192308	208	0.104889	0.18062	1.77003	GY	Group1	Stress_Y17
LOC_Os04g10420	NA	CW7, putative, expressed	4	5655847	5666499	S4_5666431	C/T	4	5666431	4.02822e-06	0.201923	208	0.104889	0.203444	0.502341	GY	Group1	Stress_Y17
LOC_Os04g10434	NA	amidase family protein, putative, expressed	4	5669157	5675737	S4_5672376	T/C	4	5672376	3.13921e-05	0.185096	208	0.104889	0.18448	1.2645	GY	Group1	Stress_Y17
LOC_Os04g10434	NA	amidase family protein, putative, expressed	4	5669157	5675737	S4_5672759	T/C	4	5672759	9.2209e-05	0.211538	208	0.104889	0.174746	-1.01688	GY	Group1	Stress_Y17
LOC_Os04g10910	NA	expressed protein	4	5911713	5914570	S4_5912546	T/C	4	5912546	8.09969e-05	0.101523	394	0.0249396	0.064617	NA	GY	Group2	Stress_Y17
LOC_Os04g11510	NA	methyl-CpG binding domain containing protein, expressed	4	6292199	6298189	S4_6298123	C/T	4	6298123	6.55621e-05	0.0502092	239	0.0710264	0.136356	-3.30024	PN	Group1	Stress_Y17
LOC_Os04g18700	NA	retrotransposon protein, putative, Ty3-gypsy subclass, expressed	4	10358400	10367540	S4_10359418	G/A	4	10359418	6.41153e-05	0.117268	388	0.0378276	0.0787617	-0.982182	SSR	Group2	Stress_Y17
LOC_Os04g19370	NA	hypothetical protein	4	10782300	10786750	S4_10782354	A/G	4	10782354	8.94499e-06	0.0790155	386	0.0824141	0.131106	-1.97635	FGN	Group2	Stress_Y17
LOC_Os04g21180	NA	retrotransposon protein, putative, Ty1-copia subclass, expressed	4	11921656	11925528	S4_11923749	A/G	4	11923749	3.55008e-05	0.0608808	386	0.0824141	0.124476	1.27585	FGN	Group2	Stress_Y17
LOC_Os04g29960	NA	OsWAK43 - OsWAK receptor-like protein kinase, expressed	4	17874313	17877280	S4_17875289	T/C	4	17875289	4.96135e-05	0.199519	208	0.104889	0.180326	NA	GY	Group1	Stress_Y17
LOC_Os04g29960	NA	OsWAK43 - OsWAK receptor-like protein kinase, expressed	4	17874313	17877280	S4_17876731	A/C	4	17876731	5.26126e-05	0.168269	208	0.104889	0.179796	-2.20229	GY	Group1	Stress_Y17
LOC_Os04g29960	NA	OsWAK43 - OsWAK receptor-like protein kinase, expressed	4	17874313	17877280	S4_17876744	C/T	4	17876744	1.50049e-05	0.170673	208	0.104889	0.191237	1.21584	GY	Group1	Stress_Y17
LOC_Os04g29960	NA	OsWAK43 - OsWAK receptor-like protein kinase, expressed	4	17874313	17877280	S4_17876746	A/T	4	17876746	2.08649e-05	0.175481	208	0.104889	0.188211	-0.697657	GY	Group1	Stress_Y17
LOC_Os04g38970	NA	protein binding protein, putative, expressed	4	23148230	23151738	S4_23148438	T/C	4	23148438	8.5932e-05	0.0752427	206	0.0254951	0.103028	1.76957	SSR	Group1	Stress_Y17
LOC_Os04g47059	Kala4|OsS1	TRANSPARENT TESTA 8, putative, expressed	4	27915598	27939824	S4_27917908	T/A	4	27917908	5.6007e-05	0.0627615	239	0.0710264	0.137622	-2.16411	PN	Group1	Stress_Y17
LOC_Os04g51690	NA	glycosyl hydrolase family 47 domain contain protein, expressed	4	30621160	30628372	S4_30622647	A/G	4	30622647	8.38686e-05	0.179916	239	0.0710264	0.134382	-1.23207	PN	Group1	Stress_Y17
LOC_Os04g51760	NA	expressed protein	4	30671846	30673888	S4_30672465	A/C	4	30672465	6.46355e-05	0.23431	239	0.0710264	0.13647	0.00572745	PN	Group1	Stress_Y17
LOC_Os04g51760	NA	expressed protein	4	30671846	30673888	S4_30672466	A/G	4	30672466	6.32975e-05	0.17364	239	0.0710264	0.136638	0.0538818	PN	Group1	Stress_Y17
LOC_Os04g51760	NA	expressed protein	4	30671846	30673888	S4_30673598	A/T	4	30673598	5.51409e-05	0.259414	239	0.0710264	0.137747	-0.276572	PN	Group1	Stress_Y17
LOC_Os04g51800	NA	MYB protein, putative, expressed	4	30702497	30710998	S4_30705926	A/C	4	30705926	7.29884e-05	0.177824	239	0.0710264	0.135495	0.114994	PN	Group1	Stress_Y17
LOC_Os04g51800	NA	MYB protein, putative, expressed	4	30702497	30710998	S4_30707407	A/T	4	30707407	5.61752e-05	0.16318	239	0.0710264	0.137597	-0.160146	PN	Group1	Stress_Y17
LOC_Os04g51809	NA	expressed protein	4	30716167	30722227	S4_30717034	A/G	4	30717034	5.38735e-05	0.158996	239	0.0710264	0.137934	0.153669	PN	Group1	Stress_Y17
LOC_Os04g51809	NA	expressed protein	4	30716167	30722227	S4_30717256	C/T	4	30717256	8.29821e-05	0.161088	239	0.0710264	0.134467	-0.120751	PN	Group1	Stress_Y17
LOC_Os04g51809	NA	expressed protein	4	30716167	30722227	S4_30717380	G/C	4	30717380	1.09461e-05	0.200837	239	0.0710264	0.150898	0.19034	PN	Group1	Stress_Y17
LOC_Os04g51809	NA	expressed protein	4	30716167	30722227	S4_30717698	T/C	4	30717698	4.22109e-05	0.167364	239	0.0710264	0.139901	-0.039715	PN	Group1	Stress_Y17
LOC_Os04g51809	NA	expressed protein	4	30716167	30722227	S4_30718142	T/A	4	30718142	8.28065e-05	0.171548	239	0.0710264	0.134484	2.51256	PN	Group1	Stress_Y17
LOC_Os04g51809	NA	expressed protein	4	30716167	30722227	S4_30719794	A/G	4	30719794	8.2621e-05	0.192469	239	0.0710264	0.134502	-0.351986	PN	Group1	Stress_Y17
LOC_Os04g51809	NA	expressed protein	4	30716167	30722227	S4_30720069	C/T	4	30720069	6.79968e-05	0.16318	239	0.0710264	0.136063	0.00536559	PN	Group1	Stress_Y17
LOC_Os04g51809	NA	expressed protein	4	30716167	30722227	S4_30721340	G/C	4	30721340	4.43991e-05	0.158996	239	0.0710264	0.139493	0.00658461	PN	Group1	Stress_Y17
LOC_Os04g51830	OsHKT1;4	OsHKT1;4 - Na+ transporter, expressed	4	30734183	30739334	S4_30736193	T/G	4	30736193	7.73822e-05	0.167364	239	0.0710264	0.135026	-0.287291	PN	Group1	Stress_Y17
LOC_Os04g51830	OsHKT1;4	OsHKT1;4 - Na+ transporter, expressed	4	30734183	30739334	S4_30736574	C/T	4	30736574	9.53453e-05	0.16318	239	0.0710264	0.133357	0.101257	PN	Group1	Stress_Y17
LOC_Os04g51830	OsHKT1;4	OsHKT1;4 - Na+ transporter, expressed	4	30734183	30739334	S4_30736617	T/C	4	30736617	4.2614e-05	0.16318	239	0.0710264	0.139824	0.0201666	PN	Group1	Stress_Y17
LOC_Os04g51830	OsHKT1;4	OsHKT1;4 - Na+ transporter, expressed	4	30734183	30739334	S4_30736845	C/A	4	30736845	5.42373e-05	0.165272	239	0.0710264	0.13788	-0.0858698	PN	Group1	Stress_Y17
LOC_Os04g51830	OsHKT1;4	OsHKT1;4 - Na+ transporter, expressed	4	30734183	30739334	S4_30737072	C/T	4	30737072	1.79034e-05	0.167364	239	0.0710264	0.146868	-0.338521	PN	Group1	Stress_Y17
LOC_Os04g51830	OsHKT1;4	OsHKT1;4 - Na+ transporter, expressed	4	30734183	30739334	S4_30737319	C/T	4	30737319	9.47797e-05	0.167364	239	0.0710264	0.133405	-0.660097	PN	Group1	Stress_Y17
LOC_Os04g51830	OsHKT1;4	OsHKT1;4 - Na+ transporter, expressed	4	30734183	30739334	S4_30737928	C/T	4	30737928	7.74323e-05	0.167364	239	0.0710264	0.135021	-0.0543075	PN	Group1	Stress_Y17
LOC_Os04g51830	OsHKT1;4	OsHKT1;4 - Na+ transporter, expressed	4	30734183	30739334	S4_30737946	T/C	4	30737946	7.29909e-05	0.169456	239	0.0710264	0.135495	-0.0916968	PN	Group1	Stress_Y17
LOC_Os04g51930	NA	retrotransposon protein, putative, LINE subclass, expressed	4	30811261	30816943	S4_30813917	G/A	4	30813917	5.38681e-05	0.108787	239	0.0710264	0.137935	0.29892	PN	Group1	Stress_Y17
LOC_Os04g51930	NA	retrotransposon protein, putative, LINE subclass, expressed	4	30811261	30816943	S4_30814058	G/A	4	30814058	7.89677e-05	0.161088	239	0.0710264	0.134864	-0.0233226	PN	Group1	Stress_Y17
LOC_Os04g52140	OsCTR3	protein kinase domain containing protein, expressed	4	30974112	30979849	S4_30979813	C/A	4	30979813	9.69721e-05	0.194561	239	0.0710264	0.133222	0.344697	PN	Group1	Stress_Y17
LOC_Os04g52270	NA	coatomer subunit epsilon, putative, expressed	4	31063845	31068874	S4_31065985	C/T	4	31065985	8.71237e-06	0.0769231	208	0.104889	0.196258	7.18455	GY	Group1	Stress_Y17
LOC_Os04g52270	NA	coatomer subunit epsilon, putative, expressed	4	31063845	31068874	S4_31067337	G/A	4	31067337	6.21695e-05	0.0793269	208	0.104889	0.178289	-5.83236	GY	Group1	Stress_Y17
LOC_Os04g52270	NA	coatomer subunit epsilon, putative, expressed	4	31063845	31068874	S4_31067673	T/A	4	31067673	4.61363e-05	0.0817308	208	0.104889	0.180984	1.13278	GY	Group1	Stress_Y17
LOC_Os04g52270	NA	coatomer subunit epsilon, putative, expressed	4	31063845	31068874	S4_31068114	G/A	4	31068114	4.61363e-05	0.0817308	208	0.104889	0.180984	-8.09456	GY	Group1	Stress_Y17
LOC_Os04g52280	FC1|OsCAD7	dehydrogenase, putative, expressed	4	31069545	31075601	S4_31069653	A/G	4	31069653	8.71237e-06	0.0769231	208	0.104889	0.196258	-0.542614	GY	Group1	Stress_Y17
LOC_Os04g52420	NA	expressed protein	4	31146981	31154686	S4_31149830	T/G	4	31149830	6.80737e-05	0.05	390	0.164556	0.199654	-0.834469	TSN	Group2	Stress_Y17
LOC_Os04g52820	NA	expressed protein	4	31448546	31452514	S4_31451783	T/A	4	31451783	8.87076e-06	0.0884615	390	0.164556	0.208454	4.33599	TSN	Group2	Stress_Y17
LOC_Os04g52830	Ctb1	OsFBK15 - F-box domain and kelch repeat containing protein, expressed	4	31458944	31462079	S4_31459521	T/G	4	31459521	9.08625e-05	0.074359	390	0.164556	0.198422	-4.28849	TSN	Group2	Stress_Y17
LOC_Os04g53250	NA	polyphenol oxidase protein, putative, expressed	4	31721718	31723105	S4_31722035	T/C	4	31722035	9.47544e-05	0.0871795	390	0.164556	0.198243	1.37239	TSN	Group2	Stress_Y17
LOC_Os04g53250	NA	polyphenol oxidase protein, putative, expressed	4	31721718	31723105	S4_31722168	T/G	4	31722168	4.62159e-05	0.110256	390	0.164556	0.201313	0.53516	TSN	Group2	Stress_Y17
LOC_Os04g53250	NA	polyphenol oxidase protein, putative, expressed	4	31721718	31723105	S4_31722495	A/G	4	31722495	7.48623e-05	0.0961538	390	0.164556	0.199248	NA	TSN	Group2	Stress_Y17
LOC_Os04g53250	NA	polyphenol oxidase protein, putative, expressed	4	31721718	31723105	S4_31722705	T/C	4	31722705	8.04474e-05	0.0871795	390	0.164556	0.198941	1.26837	TSN	Group2	Stress_Y17
LOC_Os04g53290	NA	polyphenol oxidase protein, putative, expressed	4	31740814	31741449	S4_31740920	T/C	4	31740920	8.67667e-06	0.0846154	390	0.164556	0.20855	7.21517	TSN	Group2	Stress_Y17
LOC_Os04g53290	NA	polyphenol oxidase protein, putative, expressed	4	31740814	31741449	S4_31741087	A/G	4	31741087	4.63639e-05	0.0871795	390	0.164556	0.201299	-2.19994	TSN	Group2	Stress_Y17
LOC_Os04g53300	NA	polyphenol oxidase, putative, expressed	4	31749103	31752274	S4_31750081	A/G	4	31750081	4.62297e-05	0.0505181	386	0.0824141	0.123216	0.952086	FGN	Group2	Stress_Y17
LOC_Os04g53360	NA	expressed protein	4	31777218	31780998	S4_31780371	T/C	4	31780371	7.0694e-05	0.0705128	390	0.164556	0.199493	2.25028	TSN	Group2	Stress_Y17
LOC_Os04g53360	NA	expressed protein	4	31777218	31780998	S4_31780371	T/C	4	31780371	8.72509e-05	0.0686528	386	0.0824141	0.1202	-0.346007	FGN	Group2	Stress_Y17
LOC_Os04g53400	NA	MBTB6 - Bric-a-Brac, Tramtrack, Broad Complex BTB domain with Meprin and TRAF Homology MATH domain, expressed	4	31809708	31810835	S4_31809878	T/C	4	31809878	7.96676e-05	0.0634715	386	0.0824141	0.12063	1.8879	FGN	Group2	Stress_Y17
LOC_Os04g55140	NA	retrotransposon protein, putative, Ty1-copia subclass, expressed	4	32781099	32784996	S4_32784106	A/G	4	32784106	1.94347e-05	0.192308	390	0.164556	0.205047	-6.14504	TSN	Group2	Stress_Y17
LOC_Os04g56040	NA	glycine rich protein family protein, putative, expressed	4	33377338	33378405	S4_33377778	C/T	4	33377778	3.76907e-05	0.239637	386	0.0824141	0.12419	-2.18104	FGN	Group2	Stress_Y17
LOC_Os04g56120	NA	protein kinase domain containing protein, expressed	4	33421535	33423302	S4_33421789	T/A	4	33421789	8.7715e-05	0.134715	386	0.0824141	0.120175	3.88549	FGN	Group2	Stress_Y17
LOC_Os05g01970	NA	NAD dependent epimerase/dehydratase family protein, putative, expressed	5	552021	561773	S5_556476	G/A	5	556476	9.84845e-05	0.0730769	390	0.164556	0.198079	-2.66157	TSN	Group2	Stress_Y17
LOC_Os05g02620	NA	expressed protein	5	912965	913746	S5_913127	G/C	5	913127	4.89598e-05	0.338083	386	0.0824141	0.122943	1.31397	FGN	Group2	Stress_Y17
LOC_Os05g02740	NA	expressed protein	5	986271	988521	S5_988413	G/T	5	988413	7.68465e-05	0.411917	386	0.0824141	0.120801	-1.54879	FGN	Group2	Stress_Y17
LOC_Os05g03360	NA	retrotransposon protein, putative, unclassified, expressed	5	1377715	1383864	S5_1378573	A/C	5	1378573	7.50976e-05	0.119247	239	0.0710264	0.135267	NA	PN	Group1	Stress_Y17
LOC_Os05g03360	NA	retrotransposon protein, putative, unclassified, expressed	5	1377715	1383864	S5_1381331	A/G	5	1381331	4.70576e-05	0.115063	239	0.0710264	0.139024	-1.7593	PN	Group1	Stress_Y17
LOC_Os05g03650	NA	retrotransposon protein, putative, unclassified, expressed	5	1576191	1582531	S5_1576538	A/G	5	1576538	9.54058e-05	0.176245	261	0.291989	0.335293	3.21014	HD	Group1	Stress_Y17
LOC_Os05g04220	OsGlnB	nitrogen regulatory protein P-II, putative, expressed	5	1924066	1927242	S5_1927087	C/A	5	1927087	2.3741e-05	0.274038	208	0.104889	0.187029	-1.78321	GY	Group1	Stress_Y17
LOC_Os05g04220	OsGlnB	nitrogen regulatory protein P-II, putative, expressed	5	1924066	1927242	S5_1927102	A/T	5	1927102	6.86873e-05	0.336538	208	0.104889	0.177391	0.881809	GY	Group1	Stress_Y17
LOC_Os05g04240	NA	GDSL-like lipase/acylhydrolase, putative, expressed	5	1931890	1934198	S5_1933397	C/A	5	1933397	3.49604e-05	0.341346	208	0.104889	0.183501	0.987957	GY	Group1	Stress_Y17
LOC_Os05g04330	NA	DNA methyltransferase protein, putative, expressed	5	1965596	1974888	S5_1965605	A/C	5	1965605	5.83353e-05	0.334135	208	0.104889	0.178863	-0.146911	GY	Group1	Stress_Y17
LOC_Os05g05720	NA	tetratricopeptide repeat domain containing protein, expressed	5	2852845	2859273	S5_2859108	C/T	5	2859108	4.24464e-05	0.0627615	239	0.0710264	0.139856	0.0136342	PN	Group1	Stress_Y17
LOC_Os05g05940	NA	stress-related protein, putative, expressed	5	2970758	2972775	S5_2971166	C/T	5	2971166	7.92279e-06	0.0585774	239	0.0710264	0.15356	0.0938653	PN	Group1	Stress_Y17
LOC_Os05g06940	OsCRSH3	relA-SpoT like protein RSH4, putative, expressed	5	3638117	3640497	S5_3639711	A/C	5	3639711	6.67392e-05	0.209302	215	0.0572061	0.131196	NA	FGN	Group1	Stress_Y17
LOC_Os05g06940	OsCRSH3	relA-SpoT like protein RSH4, putative, expressed	5	3638117	3640497	S5_3639711	A/C	5	3639711	3.92184e-05	0.216346	208	0.104889	0.182457	NA	GY	Group1	Stress_Y17
LOC_Os05g26000	NA	retrotransposon protein, putative, unclassified, expressed	5	15098890	15107170	S5_15107104	A/G	5	15107104	9.62296e-05	0.475728	206	0.0254951	0.101912	1.60946	SSR	Group1	Stress_Y17
LOC_Os05g27050	NA	peptide transporter, putative, expressed	5	15727606	15729187	S5_15727700	T/C	5	15727700	3.3519e-05	0.0558376	394	0.0249396	0.0689832	1.20047	GY	Group2	Stress_Y17
LOC_Os05g28540	NA	retrotransposon protein, putative, Ty3-gypsy subclass, expressed	5	16720159	16724460	S5_16721187	A/G	5	16721187	4.81794e-05	0.143396	265	0.000718228	0.0661431	0.262513	SN	Group1	Stress_Y17
LOC_Os05g29676	NA	RING-H2 finger protein, putative, expressed	5	17149339	17152306	S5_17152204	A/G	5	17152204	4.29531e-05	0.0541237	388	0.0378276	0.0807496	-3.64638	SSR	Group2	Stress_Y17
LOC_Os05g29700	NA	retrotransposon, putative, centromere-specific, expressed	5	17168356	17172253	S5_17171819	A/G	5	17171819	8.70475e-05	0.0708763	388	0.0378276	0.07725	0.121693	SSR	Group2	Stress_Y17
LOC_Os05g29710	NA	RING-H2 finger protein, putative, expressed	5	17175702	17177087	S5_17177005	A/C	5	17177005	1.9313e-05	0.114691	388	0.0378276	0.0847407	0.973332	SSR	Group2	Stress_Y17
LOC_Os05g29730	NA	retrotransposon protein, putative, unclassified, expressed	5	17194534	17195602	S5_17194798	A/G	5	17194798	6.81319e-06	0.114691	388	0.0378276	0.0899888	-0.689751	SSR	Group2	Stress_Y17
LOC_Os05g29730	NA	retrotransposon protein, putative, unclassified, expressed	5	17194534	17195602	S5_17194960	T/C	5	17194960	1.3017e-05	0.231959	388	0.0378276	0.086722	-0.898413	SSR	Group2	Stress_Y17
LOC_Os05g29730	NA	retrotransposon protein, putative, unclassified, expressed	5	17194534	17195602	S5_17195102	T/C	5	17195102	3.33911e-05	0.127577	388	0.0378276	0.0820035	0.319999	SSR	Group2	Stress_Y17
LOC_Os05g29730	NA	retrotransposon protein, putative, unclassified, expressed	5	17194534	17195602	S5_17195285	A/G	5	17195285	1.33437e-05	0.141753	388	0.0378276	0.0865973	-0.204301	SSR	Group2	Stress_Y17
LOC_Os05g29730	NA	retrotransposon protein, putative, unclassified, expressed	5	17194534	17195602	S5_17195379	A/G	5	17195379	1.75954e-05	0.150773	388	0.0378276	0.0852078	-5.16926	SSR	Group2	Stress_Y17
LOC_Os05g29735	NA	expressed protein	5	17197738	17198647	S5_17198053	T/C	5	17198053	1.00587e-05	0.154639	388	0.0378276	0.0880207	-0.233054	SSR	Group2	Stress_Y17
LOC_Os05g29750	NA	cytochrome P450 71E1, putative, expressed	5	17202440	17204248	S5_17203375	T/C	5	17203375	4.216e-06	0.103093	388	0.0378276	0.0924229	-0.474154	SSR	Group2	Stress_Y17
LOC_Os05g29750	NA	cytochrome P450 71E1, putative, expressed	5	17202440	17204248	S5_17204248	T/C	5	17204248	1.02901e-05	0.106959	388	0.0378276	0.087906	0.801058	SSR	Group2	Stress_Y17
LOC_Os05g29760	NA	ferrochelatase-2, chloroplast precursor, putative, expressed	5	17209580	17216776	S5_17209751	T/G	5	17209751	4.27828e-05	0.104381	388	0.0378276	0.0807694	0.176925	SSR	Group2	Stress_Y17
LOC_Os05g29760	NA	ferrochelatase-2, chloroplast precursor, putative, expressed	5	17209580	17216776	S5_17210022	C/G	5	17210022	6.36794e-05	0.0992268	388	0.0378276	0.0787955	-0.777213	SSR	Group2	Stress_Y17
LOC_Os05g29760	NA	ferrochelatase-2, chloroplast precursor, putative, expressed	5	17209580	17216776	S5_17210330	A/T	5	17210330	6.80928e-06	0.115979	388	0.0378276	0.0899917	-0.445917	SSR	Group2	Stress_Y17
LOC_Os05g29760	NA	ferrochelatase-2, chloroplast precursor, putative, expressed	5	17209580	17216776	S5_17215732	C/T	5	17215732	4.01585e-05	0.112113	388	0.0378276	0.0810843	-4.46332	SSR	Group2	Stress_Y17
LOC_Os05g29770	NA	expressed protein	5	17216829	17220202	S5_17217077	T/C	5	17217077	2.35928e-05	0.113402	388	0.0378276	0.0837384	-0.925358	SSR	Group2	Stress_Y17
LOC_Os05g29770	NA	expressed protein	5	17216829	17220202	S5_17217362	T/C	5	17217362	9.82356e-06	0.114691	388	0.0378276	0.08814	0.111022	SSR	Group2	Stress_Y17
LOC_Os05g29770	NA	expressed protein	5	17216829	17220202	S5_17217510	T/C	5	17217510	3.37405e-05	0.100515	388	0.0378276	0.0819516	-0.263826	SSR	Group2	Stress_Y17
LOC_Os05g29770	NA	expressed protein	5	17216829	17220202	S5_17217649	A/G	5	17217649	3.16127e-05	0.114691	388	0.0378276	0.0822765	0.163231	SSR	Group2	Stress_Y17
LOC_Os05g29770	NA	expressed protein	5	17216829	17220202	S5_17217790	T/C	5	17217790	1.75643e-05	0.112113	388	0.0378276	0.0852167	0.355437	SSR	Group2	Stress_Y17
[truncated: 291 more rows]

## Sheet: Table S3
Table S3 The known genes involved in rice salt stress recorded in QTARO and funricegenes databases
[truncated: 526 more rows]

[truncated: 4 more sheets: Table S4, Table S5, Table S6, Table S7]
